# Supplementary material for: Brønsted acid-enhanced copper-catalyzed atroposelective cycloisomerization to axially chiral arylquinolizones via dearomatization of pyridine
Source: PubMed Central journal article supplement (PMC8766466; doi:10.1038/s41467-022-27989-3), 2022-01-18
Supplement: 41467_2022_27989_MOESM1_ESM.pdf [file 41467_2022_27989_MOESM1_ESM.pdf]

## **Supplementary Information**

### **Brønsted Acid-Enhanced Copper-Catalyzed Atroposelective Cycloisomerization to Axially Chiral Arylquinolizones via Dearomatization of Pyridine**

Xiao-Long Min, Xiu-Lian Zhang, Wenbin Yi\* & Ying He\*

School of Chemistry and Chemical Engineering, Nanjing University of Science & Technology, Nanjing 210094, China

## Table of Contents

|                                                                                                                  |      |
|------------------------------------------------------------------------------------------------------------------|------|
| Supplementary Methods .....                                                                                      | S3   |
| General Information.....                                                                                         | S3   |
| General procedure A: Synthesis of substrate <b>1</b> from 2-substituted-1-ethynynaphthalene <sup>1</sup> .....   | S3   |
| General procedure B: Synthesis of 2-alkoxy-1-ethynynaphthalene from 2-naphthol.....                              | S4   |
| General procedure C: Synthesis of 1-ethynyl- <i>N,N</i> -dialkylnaphthalen-2-amine from<br>2-naphthylamine ..... | S5   |
| General procedure D: Synthesis of 2-halide-1-ethynynaphthalene from 1-Naphthylamine .....                        | S7   |
| General procedure E: Synthesis of 1-ethynyl-2-alkylnaphthalene from 2-alkylnaphthalene.....                      | S8   |
| General procedure F: Initial studies for the synthesis of <b>2a</b> .....                                        | S23  |
| Optimization of reaction conditions.....                                                                         | S23  |
| General procedure G: Comparison of (PhO) <sub>2</sub> POOH and CPA for the reaction .....                        | S25  |
| General procedure H: Synthesis of the enantioenriched products <b>2</b> .....                                    | S26  |
| Racemization experiments .....                                                                                   | S39  |
| Procedure for gram-scale reaction of <b>2b</b> .....                                                             | S44  |
| Synthetic transformations. ....                                                                                  | S44  |
| Application of <b>10</b> for enantioselective Michael addition. ....                                             | S52  |
| <sup>1</sup> H NMR and <sup>31</sup> P NMR spectrum of <b>1b</b> and CPA.....                                    | S53  |
| Dynamic <sup>1</sup> H NMR spectrum of <b>1k</b> and CPA .....                                                   | S55  |
| Linear effect of ligand and product.....                                                                         | S56  |
| The linear free energy relationship analysis <sup>a</sup> .....                                                  | S57  |
| Spectral data.....                                                                                               | S60  |
| HPLC data.....                                                                                                   | S125 |
| Supplementary References.....                                                                                    | S158 |

## Supplementary Methods

### General Information

Unless otherwise noted, all starting materials were purchased from commercial sources and used without any further purification. Anhydrous THF is obtained by distillation over sodium and benzophenone ketyl immediately before use. The analytical data for the known compounds were found to match with the literature data and stored at -30 °C under an inert atmosphere. Thin layer chromatograph plates were visualized under UV light (254 nm) or by staining with phosphomolybdic acid or KMnO<sub>4</sub> followed by heating. Abbreviations are reported as follows: DCM = dichloromethane, DCE = 1,2-dichloroethane, THF = tetrahydrofuran, DMF = *N,N*-dimethylformamide, EA = ethyl acetate, TLC = thin layer chromatograph, PMB = *p*-methoxybenzyl. Nuclear magnetic resonance (NMR) spectra were recorded using an AVANCE 500 Bruker spectrometer and chemical shifts were reported in ppm. Multiplicities are reported using the following abbreviations: s = singlet, d = doublet, t = triplet, q = quartet, m = multiplet. Melting points were measured on INESA SGW® X-4A. The optical rotation values were measured on Hanon instruments P850. High resolution mass spectral data were acquired on Thermo Fisher Q-Exactive-Focus. Enantiomeric excesses were determined on a Thermo Fisher UltiMate 3000 Chiral HPLC. X-ray crystallographic analysis was carried out by Bruker APEX-II CCD. Reflections were merged by SHEXL according to the crystal class for calculation of statistics and refinement.

### General procedure A: Synthesis of substrate 1 from 2-substituted-1-ethynynaphthalene<sup>1</sup>

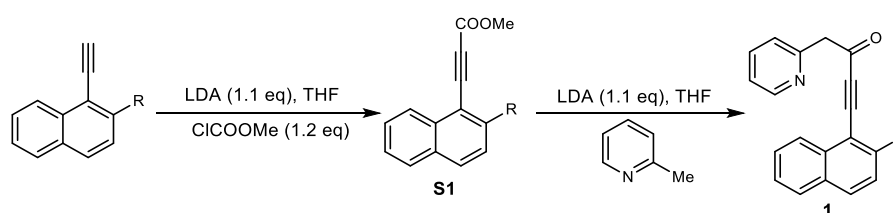

Under an argon atmosphere, to a flame-dried round-bottom flask equipped with a stirring bar was added corresponding 1-ethynynaphthalene (1.0 eq) and dry THF (0.5 M). After the mixture was cooled down to -78 °C, LDA (2 M in toluene) (1.1 eq) was added dropwise. The reaction was stirred at same temperature for 30 min. Methyl chloroformate (1.2 eq) was then added into the mixture. When the alkyne reacted completely, the mixture was quenched with saturated NH<sub>4</sub>Cl

aqueous. The aqueous layer was extracted with EA (20 mL×3). The combined extracts were washed with brine, dried over anhydrous Na<sub>2</sub>SO<sub>4</sub>, filtered and concentrated in vacuo. The crude product was purified by column chromatograph over silica gel to afford the corresponding ester **S1**.

Under an argon atmosphere, to a flame-dried round-bottom flask equipped with a stirring bar was added 2-methylpyridine (1.0 eq) and anhydrous THF (0.3 M). After the mixture was cooled down to -78 °C, LDA (2 M in toluene) (1.1 eq) was added dropwise. The reaction mixture was stirred at same temperature for 30 min. Then the above ester **S1** dissolved in THF was added to the reaction dropwise *via* syringe. When the raw material reacted completely, the mixture was quenched with saturated NH<sub>4</sub>Cl aqueous. The aqueous layer was extracted with EA (20 mL×3). The combined extracts were washed with brine, dried over anhydrous Na<sub>2</sub>SO<sub>4</sub>, filtered and concentrated in vacuo. The crude product was purified by column chromatograph over silica gel to afford the substrate.

#### General procedure B: Synthesis of 2-alkoxy-1-ethynynaphthalene from 2-naphthol

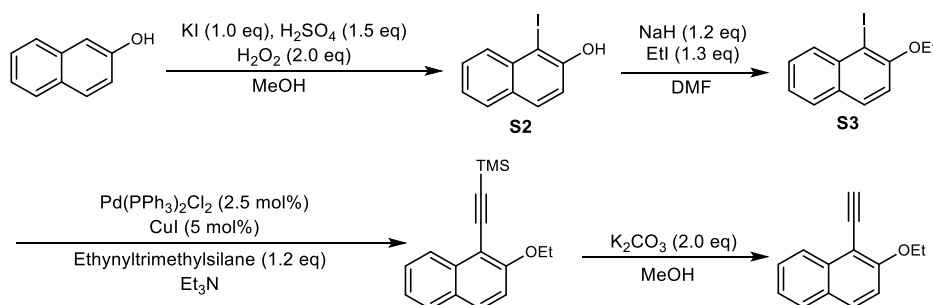

Under an argon atmosphere, to a flame-dried round-bottom flask equipped with a stirring bar was added 2-naphthol (1.0 eq), KI (1.0 eq) and MeOH (0.2 M). The reaction was cooled to 0 °C. Then concentrated H<sub>2</sub>SO<sub>4</sub> (1.5 eq) was added at the same temperature. Subsequently, H<sub>2</sub>O<sub>2</sub> (30 % in H<sub>2</sub>O, 2.0 eq) was added dropwise before the mixture slowly warmed up to room temperature. When the raw material reacted completely, the mixture was filtered. The filtrate was concentrated in vacuo. Then the residue was re-dissolved in water. The aqueous layer was extracted with EA (20 mL×2). The combined extracts were dried over anhydrous Na<sub>2</sub>SO<sub>4</sub>, filtered and concentrated in vacuo. The crude product was purified by column chromatograph over silica gel to afford **S2**.

Under an argon atmosphere, to a flame-dried round-bottom flask equipped with a stirring bar was added **S2** (1.0 eq) and DMF (0.3 M). The reaction was cooled to 0 °C before NaH (60%



dispersion in mineral oil) (1.2 eq) was added in portions. When the reaction was stirred at the same temperature for 1.0 h, EtI (1.3 eq) was added *via* syringe. The reaction was stirred for another 1.0 h at room temperature. When the raw material reacted completely, the mixture was quenched with saturated NH<sub>4</sub>Cl aqueous. The aqueous layer was extracted with EA (20 mL×3). The combined extracts were washed with brine, dried over anhydrous Na<sub>2</sub>SO<sub>4</sub>, filtered and concentrated in vacuo. The crude product was purified by column chromatograph over silica gel to afford the **S3**.

Under an argon atmosphere, to a flame-dried round-bottom flask equipped with a stirring bar was added **S3** (1.0 eq), ethynyltrimethylsilane (1.2 eq), CuI (5.0 mol%), Pd(PPh<sub>3</sub>)<sub>2</sub>Cl<sub>2</sub> (2.5 mol%) and Et<sub>3</sub>N (0.5 M). The mixture was stirred at room temperature overnight. Then the reaction was quenched with saturated NH<sub>4</sub>Cl aqueous. The aqueous layer was extracted with EA (20 mL×3). The combined extracts were dried over anhydrous Na<sub>2</sub>SO<sub>4</sub>, filtered and concentrated in vacuo. The crude product was used directly for next step without purification.

To a flame-dried round-bottom flask equipped with a stirring bar was added above crude product and K<sub>2</sub>CO<sub>3</sub> (2.0 eq). The mixture was dissolved in MeOH (0.5 M) and stirred at room temperature for 2.0 h before the solvent was removed in vacuo. Then the residue was re-dissolved in water. The aqueous layer was extracted with EA (20 mL×2). The combined extracts were dried over anhydrous Na<sub>2</sub>SO<sub>4</sub>, filtered and concentrated in vacuo. The crude product was purified by column chromatograph over silica gel to afford the 1-ethynyl-naphthalene. **1a**, **1b**, **1c**, **1d**, **1e**, **1f**, **1g**, **1r**, **1s**, **1t**, **1u**, **1v**, **1w**, **1x**, **1y** and **1z** were synthesized from this procedure and general procedure A.

### General procedure C: Synthesis of 1-ethynyl-*N,N*-dialkyl-naphthalen-2-amine from 2-naphthylamine

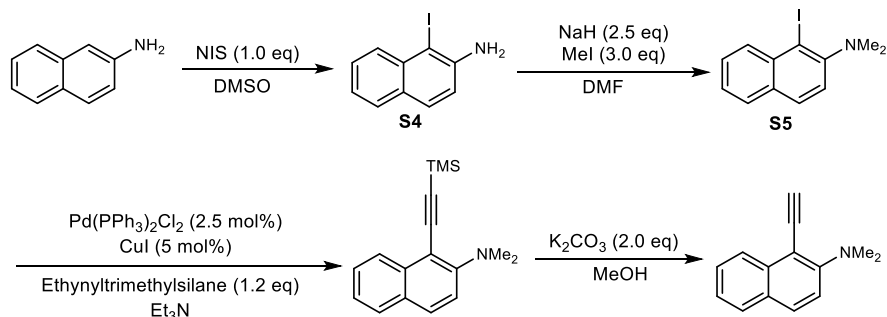

Under an argon atmosphere, to a flame-dried round-bottom flask equipped with a stirring bar was added 2-naphthylamine (1.0 eq), NIS (1.0 eq) and anhydrous DMSO (0.3 M). Then the reaction was stirred at room temperature for 2.0 h before the reaction was quenched with saturated NH<sub>4</sub>Cl aqueous. The aqueous layer was extracted with EA (20 mL×3). The combined extracts were dried over anhydrous Na<sub>2</sub>SO<sub>4</sub>, filtered and concentrated in vacuo. The crude product was purified by column chromatograph over silica gel to afford the **S4**.

Under an argon atmosphere, to a flame-dried round-bottom flask equipped with a stirring bar was added **S4** (1.0 eq) and DMF (0.3 M). The reaction was cooled to 0 °C before NaH (60% dispersion in mineral oil) (2.5 eq) was added in portions. When the reaction was stirred at the same temperature for 1.0 h, MeI (3.0 eq) was added *via* syringe. The reaction was stirred for another 1.0 h at room temperature. When the raw material reacted completely, the mixture was quenched with saturated NH<sub>4</sub>Cl aqueous. The aqueous layer was extracted with EA (20 mL×3). The combined extracts were washed with brine, dried over anhydrous Na<sub>2</sub>SO<sub>4</sub>, filtered and concentrated in vacuo. The crude product was purified by column chromatograph over silica gel to afford the **S5**.

Under an argon atmosphere, to a flame-dried round-bottom flask equipped with a stirring bar was added **S5** (1.0 eq), ethynyltrimethylsilane (1.2 eq), CuI (5.0 mol%), Pd(PPh<sub>3</sub>)<sub>2</sub>Cl<sub>2</sub> (2.5 mol%) and Et<sub>3</sub>N (0.5 M). The mixture was stirred at room temperature overnight. The reaction was then quenched with saturated NH<sub>4</sub>Cl aqueous. The aqueous layer was extracted with EA (20 mL×3). The combined extracts were dried over anhydrous Na<sub>2</sub>SO<sub>4</sub>, filtered and concentrated in vacuo. The crude product was used directly for next step without purification.

To a flame-dried round-bottom flask equipped with a stirring bar was added above crude product and K<sub>2</sub>CO<sub>3</sub> (2.0 eq). The mixture was dissolved in MeOH (0.5 M) and stirred at room temperature for 2.0 h before the solvent was removed in vacuo. Then the residue was re-dissolved in water. The aqueous layer was extracted with EA (20 mL×2). The combined extracts were dried over anhydrous Na<sub>2</sub>SO<sub>4</sub>, filtered and concentrated in vacuo. The crude product was purified by column chromatograph over silica gel to afford the 1-ethynyl-naphthalene. **1h** and **1i** were synthesized from this procedure and general procedure A.

### General procedure D: Synthesis of 2-halide-1-ethynynaphthalene from 1-Naphthylamine

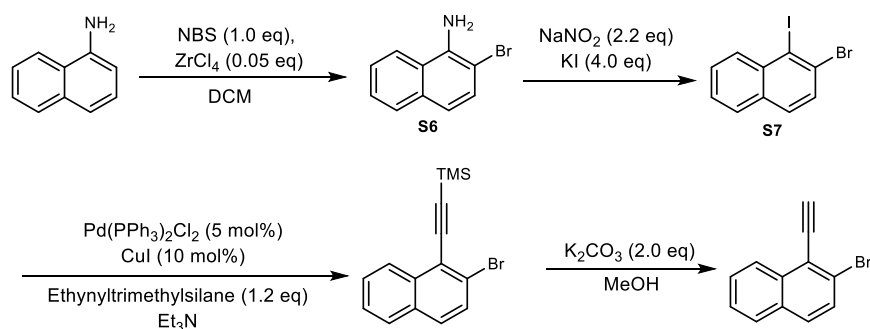

Under an argon atmosphere, to a flame-dried round-bottom flask equipped with a stirring bar was added NBS (1.0 eq) and DCM (0.2 M). The reaction was cooled to -78 °C before ZrCl<sub>4</sub> (0.05 eq) and 1-naphthylamine (1.0 eq) was added. The reaction was stirred at the same temperature for 1.0 h before saturated NaHCO<sub>3</sub> was added to quench the reaction. The aqueous layer was extracted with DCM (50 mL×2). The combined extracts were dried over anhydrous Na<sub>2</sub>SO<sub>4</sub>, filtered and concentrated in vacuo. The crude product was purified by column chromatograph over silica gel to afford the **S6**.<sup>2</sup>

To a flame-dried round-bottom flask equipped with a stirring bar was added **S6** (1.0 eq). Then concentrated HCl (4.0 eq) was added slowly. The mixture was stirred at room temperature for 20 min before the reaction was cooled to 0 °C. NaNO<sub>2</sub> (2.2 eq) was added into the mixture in portions while keep the temperature of the mixture low than 4 °C. The mixture was stirred at 0 °C for another 30 min before KI (4.0 eq) was added in one portion. The reaction was stirred at room temperature for 1.0 h and 60 °C for another 1.0 h. Then saturated Na<sub>2</sub>S<sub>2</sub>O<sub>3</sub> aqueous was added to quench the reaction. The aqueous layer was extracted with PE (50 mL×2). The combined extracts were dried over anhydrous Na<sub>2</sub>SO<sub>4</sub>, filtered and concentrated in vacuo. The crude product was purified by column chromatograph over silica gel to afford the **S7**.

Under an argon atmosphere, to a flame-dried round-bottom flask equipped with a stirring bar was added **S7** (1.0 eq), ethynyltrimethylsilane (1.2 eq), CuI (10 mol%), Pd(PPh<sub>3</sub>)<sub>2</sub>Cl<sub>2</sub> (5 mol%) and Et<sub>3</sub>N (0.5 M). The mixture was stirred at room temperature overnight. The reaction was then quenched with saturated NH<sub>4</sub>Cl aqueous. The aqueous layer was extracted with EA (20 mL×3). The combined extracts were dried over anhydrous Na<sub>2</sub>SO<sub>4</sub>, filtered and concentrated in vacuo. The crude product was used directly for next step without purification.

To a flame-dried round-bottom flask equipped with a stirring bar was added above crude product and  $K_2CO_3$  (2.0 eq). The mixture was dissolved in MeOH (0.5 M) and stirred at room temperature for 2.0 h before the solvent was removed in vacuo. Then the residue was re-dissolved in water. The aqueous layer was extracted with EA (20 mL $\times$ 2). The combined extracts were dried over anhydrous  $Na_2SO_4$ , filtered and concentrated in vacuo. The crude product was purified by column chromatograph over silica gel to afford the 1-ethynyl-naphthalene. **1n**, **1o**, **1p** and **1q** were synthesized from this procedure and general procedure A.

#### General procedure E: Synthesis of 1-ethynyl-2-alkylnaphthalene from 2-alkylnaphthalene

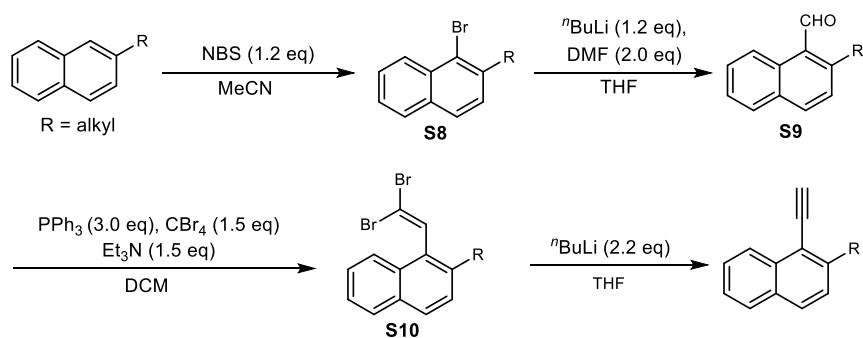

To a flame-dried round-bottom flask equipped with a stirring bar was added 2-alkylnaphthalene (1.0 eq), NBS (1.2 eq) and MeCN (0.5 M). The mixture was stirred at room temperature for 24 h. Then the reaction was quenched with saturated  $NH_4Cl$  aqueous. The aqueous layer was extracted with EA (20 mL $\times$ 3). The combined extracts were dried over anhydrous  $Na_2SO_4$ , filtered and concentrated in vacuo. The crude product was purified by column chromatograph over silica gel to afford **S8**.

To a flame-dried round-bottom flask equipped with a stirring bar was added **S8** and THF (0.3 M). The reaction was cooled to  $-78$  °C before  $nBuLi$  (2.5 M in THF) (1.2 eq) was added dropwise. The reaction was stirred at the same temperature for 1.0 h. Then anhydrous DMF (2.0 eq) was added. When the raw material reacted completely, the mixture was quenched with saturated  $NH_4Cl$  aqueous. The aqueous layer was extracted with EA (20 mL $\times$ 3). The combined extracts were washed with brine, dried over anhydrous  $Na_2SO_4$ , filtered and concentrated in vacuo. The crude product was purified by column chromatograph over silica gel to afford the **S9**.

To a flame-dried round-bottom flask equipped with a stirring bar was added  $PPh_3$  (3.0 eq),  $CBr_4$  (1.5 eq),  $Et_3N$  (1.5 eq) and DCM (0.3 M). The mixture was cooled to 0 °C. Then **S9** (1.0 eq)

dissolved in DCM (2.0 M) was added dropwise. The reaction was stirred at the same temperature for another 1.0 h. Hexane (0.1 M) was then added and the reaction was stirred overnight. When the raw material reacted completely, the mixture was filtered and concentrated in vacuo. The crude product was purified by column chromatograph over silica gel to afford the **S10**.

To a flame-dried round-bottom flask equipped with a stirring bar was added **S10** and THF (0.3 M). The reaction was cooled to -78 °C before <sup>n</sup>BuLi (2.5 M in THF) (2.2 eq) was added dropwise. The reaction was stirred at the same temperature for 2.0 h. When the raw material reacted completely, the mixture was quenched with saturated NH<sub>4</sub>Cl aqueous. The aqueous layer was extracted with EA (20 mL×3). The combined extracts were washed with brine, dried over anhydrous Na<sub>2</sub>SO<sub>4</sub>, filtered and concentrated in vacuo. The crude product was purified by column chromatograph over silica gel to afford the 1-ethynynaphthalene. **1j**, **1k**, **1l** and **1m** were synthesized from this procedure and general procedure **A**.

**1a**, 4-(2-methoxynaphthalen-1-yl)-1-(pyridin-2-yl)but-3-yn-2-one / (Z)-4-(2-methoxynaphthalen-1-yl)-1-(pyridin-2-yl)but-1-en-3-yn-2-ol

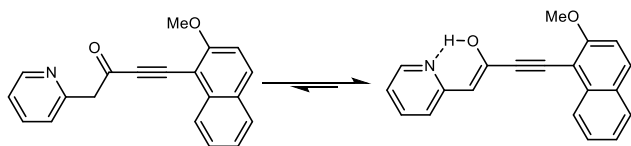

Yellow solid, m.p. 70-71 °C. <sup>1</sup>H NMR (500 MHz, Chloroform-*d*) δ: 8.37 (d, *J* = 8.5 Hz, 1H), 8.34 (s, 1H), 7.90 (d, *J* = 9.1 Hz, 1H), 7.83 (d, *J* = 8.1 Hz, 1H), 7.67 (td, *J* = 7.9, 1.6 Hz, 1H), 7.64 – 7.60 (m, 1H), 7.46 – 7.43 (m, 1H), 7.31 – 7.29 (m, 1H), 7.08 (d, *J* = 8.2 Hz, 1H), 7.05 (dd, *J* = 7.4, 5.5 Hz, 1H), 6.07 (s, 1H, *enol*), 4.10 (s, 3H). (*enol*: *keto* = 2.7 :1) <sup>13</sup>C NMR (126 MHz, Chloroform-*d*) δ: 160.85, 158.66, 156.81, 148.81, 148.76, 143.19, 136.39, 135.68, 133.51, 132.53, 130.08, 127.39, 127.28, 127.25, 127.11, 126.62, 124.26, 123.79, 123.67, 123.58, 123.32, 120.40, 118.00, 111.53, 111.18, 103.98, 102.78, 94.88, 83.82, 55.61, 55.50, 53.58. HRMS(ESI) *m/z*: calculated for [C<sub>20</sub>H<sub>15</sub>NO<sub>2</sub> + H]<sup>+</sup> 302.1181, found 302.1179.

**1b**, 4-(2-ethoxynaphthalen-1-yl)-1-(pyridin-2-yl)but-3-yn-2-one / (Z)-4-(2-ethoxynaphthalen-1-yl)-1-(pyridin-2-yl)but-1-en-3-yn-2-ol

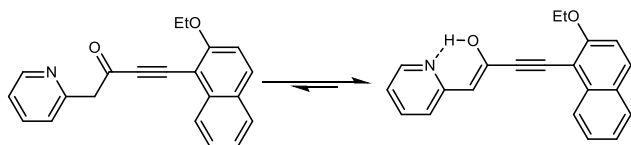

Yellow solid, m.p. 75-76 °C.  $^1\text{H NMR}$  (500 MHz, Chloroform-*d*)  $\delta$ : 8.38 (d,  $J = 8.5$  Hz, 1H), 8.33 (d,  $J = 5.3$  Hz, 1H), 7.87 (d,  $J = 9.1$  Hz, 1H), 7.84 – 7.80 (m, 1H), 7.67 (td,  $J = 7.8, 1.7$  Hz, 1H), 7.61 (t,  $J = 7.6$  Hz, 1H), 7.44 (dt,  $J = 13.3, 7.0$  Hz, 2H), 7.28 (d,  $J = 8.9$  Hz, 1H), 7.08 (d,  $J = 8.1$  Hz, 1H), 7.05 (dd,  $J = 7.3, 5.5$  Hz, 1H), 6.04 (s, 1H, *enol*), 4.36 – 4.34 (m, 2H), 1.59 (t,  $J = 7.0$  Hz, 3H). (*enol: keto = 2.5 :1*)  $^{13}\text{C NMR}$  (126 MHz, Chloroform-*d*)  $\delta$ : 158.23, 156.84, 148.95, 148.76, 143.19, 136.37, 135.65, 133.91, 133.53, 132.40, 129.92, 127.47, 127.24, 127.16, 127.06, 126.50, 124.35, 123.86, 123.61, 123.56, 123.34, 121.23, 120.39, 117.97, 113.29, 112.48, 104.76, 102.70, 96.67, 94.78, 84.02, 64.43, 64.20, 53.62, 14.10, 13.96. **HRMS(ESI) m/z**: calculated for  $[\text{C}_{21}\text{H}_{17}\text{NO}_2 + \text{H}]^+$  316.1138, found 316.1128.

**1c**, 4-(6-bromo-2-ethoxynaphthalen-1-yl)-1-(pyridin-2-yl)but-3-yn-2-one / (*Z*)-4-(6-bromo-2-ethoxynaphthalen-1-yl)-1-(pyridin-2-yl)but-1-en-3-yn-2-ol.

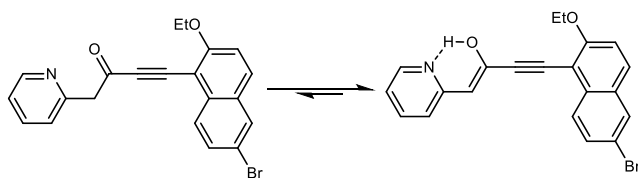

Yellow solid, m.p. 56-57 °C.  $^1\text{H NMR}$  (500 MHz, Chloroform-*d*)  $\delta$ : 8.34 – 8.27 (m, 1H), 8.20 (d,  $J = 9.0$  Hz, 1H), 7.91 (d,  $J = 2.0$  Hz, 1H), 7.70 (d,  $J = 9.1$  Hz, 1H), 7.63 (ddd,  $J = 8.8, 6.0, 1.9$  Hz, 2H), 7.23 (d,  $J = 9.1$  Hz, 1H), 7.06 (d,  $J = 8.1$  Hz, 1H), 7.04 – 6.99 (m, 1H), 6.01 (s, 1H, *enol*), 4.29 (q,  $J = 6.9$  Hz, 2H), 1.55 (t,  $J = 7.0$  Hz, 3H). (*enol: keto = 2.6 :1*)  $^{13}\text{C NMR}$  (126 MHz, Chloroform-*d*)  $\delta$ : 158.82, 156.76, 148.93, 148.74, 143.17, 136.40, 134.70, 129.74, 128.80, 128.66, 127.09, 126.75, 126.47, 125.96, 125.79, 123.47, 121.34, 121.25, 120.46, 118.06, 113.34, 103.98, 102.90, 95.10, 83.14, 64.36, 64.24, 53.70, 14.01, 13.88. **HRMS(ESI) m/z**: calculated for  $[\text{C}_{21}\text{H}_{16}\text{BrNO}_2 + \text{H}]^+$  394.0443, found 394.0442.

**1d**, 4-(7-bromo-2-ethoxynaphthalen-1-yl)-1-(pyridin-2-yl)but-3-yn-2-one / (*Z*)-4-(7-bromo-2-ethoxynaphthalen-1-yl)-1-(pyridin-2-yl)but-1-en-3-yn-2-ol

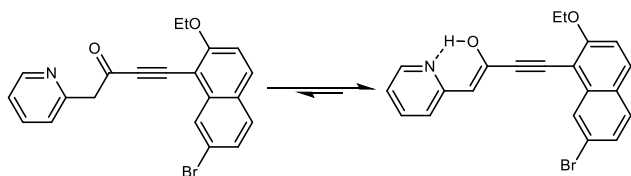

Yellow solid, m.p. 100-101 °C. <sup>1</sup>H NMR (500 MHz, Chloroform-*d*) δ: 8.48 (d, *J* = 1.9 Hz, 1H), 8.34 (dt, *J* = 5.2, 1.2 Hz, 1H), 7.81 (d, *J* = 9.0 Hz, 1H), 7.70 – 7.64 (m, 2H), 7.49 (dd, *J* = 8.7, 2.0 Hz, 1H), 7.27 (d, *J* = 9.0 Hz, 1H), 7.10 (dt, *J* = 8.1, 1.1 Hz, 1H), 7.07 (ddd, *J* = 7.4, 5.2, 1.1 Hz, 1H), 6.04 (s, 1H, *enol*), 4.37 – 4.31 (m, 2H), 1.58 (t, *J* = 6.9 Hz, 3H). (*enol*: *keto* = 3.8 :1) <sup>13</sup>C NMR (126 MHz, Chloroform-*d*) δ: 158.82, 156.76, 148.93, 148.74, 143.17, 136.40, 134.70, 129.74, 128.80, 128.66, 127.09, 126.75, 126.47, 125.96, 125.79, 123.47, 121.34, 121.25, 120.46, 118.06, 113.34, 103.98, 102.90, 95.10, 83.14, 64.36, 64.24, 53.70, 14.01, 13.88. HRMS(ESI) *m/z*: calculated for [C<sub>21</sub>H<sub>16</sub>BrNO<sub>2</sub> + H]<sup>+</sup> 394.0443, found 394.0440.

**1e**, 4-(2-ethoxy-7-phenylnaphthalen-1-yl)-1-(pyridin-2-yl)but-3-yn-2-one / (*Z*)-4-(2-ethoxy-7-phenylnaphthalen-1-yl)-1-(pyridin-2-yl)but-1-en-3-yn-2-ol

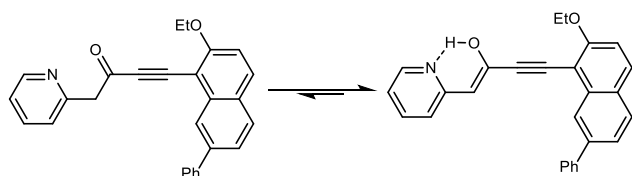

Yellow solid, m.p. 62-63 °C. <sup>1</sup>H NMR (500 MHz, Chloroform-*d*) δ: 8.62 (d, *J* = 1.8 Hz, 1H), 8.29 (d, *J* = 5.4 Hz, 1H), 7.89 – 7.81 (m, 3H), 7.81 (d, *J* = 7.7 Hz, 1H), 7.71 (dd, *J* = 8.4, 1.8 Hz, 1H), 7.63 – 7.56 (m, 3H), 7.47 (t, *J* = 7.4 Hz, 1H), 7.25 (d, *J* = 9.0 Hz, 1H), 7.03 (d, *J* = 8.1 Hz, 1H), 7.01 – 6.99 (m, 1H), 6.06 (s, 1H, *enol*), 4.33 (q, *J* = 7.0 Hz, 2H), 1.60 (t, *J* = 7.0 Hz, 3H). (*enol*: *keto* = 2.8 :1) <sup>13</sup>C NMR (126 MHz, Chloroform-*d*) δ: 160.83, 158.70, 156.71, 153.03, 149.23, 148.71, 143.02, 140.10, 139.96, 139.79, 139.13, 136.46, 135.64, 134.16, 133.85, 132.19, 129.75, 127.97, 127.92, 127.77, 126.81, 126.69, 126.66, 126.60, 126.32, 123.51, 123.34, 123.06, 122.15, 121.57, 121.22, 120.43, 118.00, 113.10, 112.28, 104.86, 102.70, 101.99, 96.22, 88.05, 84.13, 64.34, 64.14, 53.73, 14.14, 13.98. HRMS(ESI) *m/z*: calculated for [C<sub>27</sub>H<sub>11</sub>NO<sub>2</sub> + H]<sup>+</sup> 392.1651, found 392.1644.

**1f**, 4-(2-ethoxy-7-(phenylethynyl)naphthalen-1-yl)-1-(pyridin-2-yl)but-3-yn-2-one / (*Z*)-4-(2-ethoxy-7-(phenylethynyl)naphthalen-1-yl)-1-(pyridin-2-yl)but-1-en-3-yn-2-ol

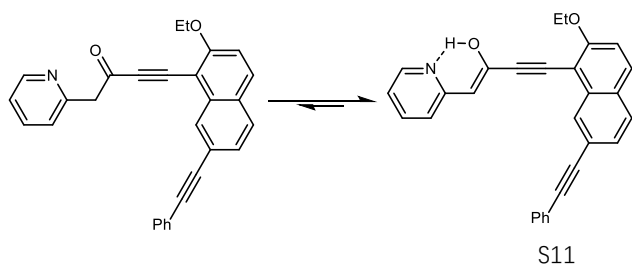

Yellow solid, m.p. 119-120 °C. <sup>1</sup>H NMR (500 MHz, Chloroform-*d*) δ: 8.54 (d, *J* = 1.4 Hz, 1H), 8.35 – 8.34 (m, 1H), 7.84 (d, *J* = 9.0 Hz, 1H), 7.79 (d, *J* = 8.5 Hz, 1H), 7.68 (ddt, *J* = 9.7, 4.4, 2.0 Hz, 3H), 7.54 (dd, *J* = 8.3, 1.8 Hz, 1H), 7.45 – 7.41 (m, 3H), 7.30 (d, *J* = 10.9 Hz, 1H), 7.10 (d, *J* = 8.2 Hz, 1H), 7.07 – 7.05 (m, 1H), 6.08 (s, 1H, *enol*), 4.38 – 4.35 (m, 3H), 1.60 (t, *J* = 6.9 Hz, 3H), 1.56 (t, *J* = 7.0 Hz, 1H). (*enol*: *keto* = 2.5 :1) <sup>13</sup>C NMR (126 MHz, Chloroform-*d*) δ: 160.84, 158.78, 156.82, 148.90, 143.19, 136.37, 135.71, 133.21, 131.97, 130.77, 130.75, 129.60, 127.75, 127.55, 127.45, 127.34, 127.16, 127.11, 126.77, 126.34, 126.04, 123.52, 122.26, 121.28, 120.45, 118.01, 113.70, 102.92, 95.19, 89.55, 89.08, 83.52, 64.40, 64.23, 53.71, 14.06, 13.93. HRMS(ESI) *m/z*: calculated for [C<sub>29</sub>H<sub>21</sub>NO<sub>2</sub> + H]<sup>+</sup> 416.1651, found 416.1649.

**1g**, 4-(2-((4-methoxybenzyl)oxy)naphthalen-1-yl)-1-(pyridin-2-yl)but-3-yn-2-one / (*Z*)-4-(2-((4-methoxybenzyl)oxy)naphthalen-1-yl)-1-(pyridin-2-yl)but-1-en-3-yn-2-ol.

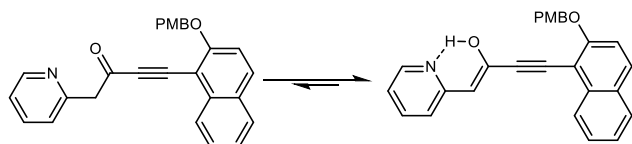

Yellow solid, m.p. 85-86 °C. <sup>1</sup>H NMR (500 MHz, Chloroform-*d*) δ: 8.41 (d, *J* = 8.4 Hz, 1H), 8.30 (d, *J* = 5.1 Hz, 1H), 7.81 (dd, *J* = 8.7, 3.4 Hz, 2H), 7.63 (dd, *J* = 7.9, 1.6 Hz, 2H), 7.54 (d, *J* = 8.3 Hz, 2H), 7.46 (d, *J* = 7.9 Hz, 1H), 7.28 (d, *J* = 9.0 Hz, 1H), 7.03 – 6.99 (m, 2H), 6.96 (t, *J* = 8.1 Hz, 2H), 5.99 (s, 1H, *enol*), 5.31 (s, 2H), 3.83 (s, 3H). (*enol*: *keto* = 3.2 :1) <sup>13</sup>C NMR (126 MHz, Chloroform-*d*) δ: 160.20, 158.46, 158.31, 158.13, 156.77, 153.08, 148.90, 143.20, 136.43, 135.69, 133.82, 133.40, 132.39, 129.91, 128.05, 127.83, 127.81, 127.69, 127.41, 127.32, 127.20, 127.15, 126.58, 124.39, 123.86, 123.75, 123.67, 123.57, 121.24, 120.39, 118.05, 114.05, 113.17, 113.03, 112.91, 105.51, 102.93, 96.82, 95.18, 87.85, 84.13, 70.32, 70.00, 54.27, 53.60. HRMS(ESI) *m/z*: calculated for [C<sub>27</sub>H<sub>11</sub>NO<sub>3</sub> + H]<sup>+</sup> 408.1600, found 408.1591.

**1h**, 4-(2-(dimethylamino)naphthalen-1-yl)-1-(pyridin-2-yl)but-3-yn-2-one / (*Z*)-4-(2-(dimethylamino)naphthalen-1-yl)-1-(pyridin-2-yl)but-1-en-3-yn-2-ol

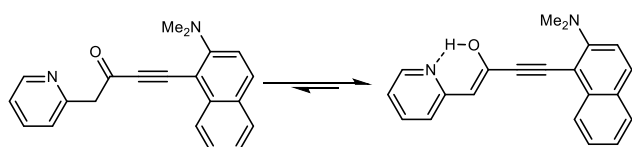

Yellow solid, m.p. 78-79 °C. <sup>1</sup>H NMR (500 MHz, Chloroform-*d*) δ: 8.69 (dd, *J* = 5.0, 1.8 Hz, 1H), 8.42 (d, *J* = 8.4 Hz, 1H), 8.32 – 8.20 (m, 1H), 7.96 (d, *J* = 8.5 Hz, 1H), 7.74 (ddd, *J* = 16.4,



7.0, 3.2 Hz, 3H), 7.59 (dtd,  $J = 12.1, 7.3, 6.7, 1.5$  Hz, 2H), 7.44 – 7.35 (m, 2H), 7.22 (d,  $J = 9.1$  Hz, 1H), 7.08 (d,  $J = 9.2$  Hz, 1H), 7.03 (d,  $J = 8.1$  Hz, 1H), 7.01 – 6.95 (m, 1H), 6.00 (s, 1H, *enol*), 4.30 (s, 1H, *keto*), 3.21 (s, 6H). (*enol*: *keto* = 1.4 :1)  $^{13}\text{C}$  NMR (126 MHz, Chloroform-*d*)  $\delta$ : 156.79, 155.56, 153.48, 153.39, 149.60, 148.75, 142.95, 136.42, 135.72, 135.07, 134.29, 131.69, 129.26, 127.09, 127.02, 126.98, 126.97, 126.42, 126.21, 123.85, 123.60, 123.19, 122.74, 122.62, 121.25, 120.32, 117.81, 116.73, 116.25, 103.95, 101.81, 99.50, 99.21, 96.71, 92.95, 87.48, 53.11, 42.63, 42.50, 28.75. HRMS(ESI)  $m/z$ : calculated for  $[\text{C}_{21}\text{H}_{18}\text{N}_2\text{O} + \text{H}]^+$  315.1497, found 315.1487.

**1i**, 4-(2-(dibenzylamino)naphthalen-1-yl)-1-(pyridin-2-yl)but-3-yn-2-one / (*Z*)-4-(2-(dibenzylamino)naphthalen-1-yl)-1-(pyridin-2-yl)but-1-en-3-yn-2-ol

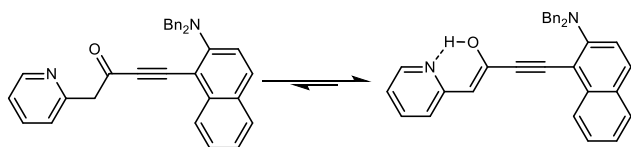

Yellow solid, m.p. 56-57 °C.  $^1\text{H}$  NMR (500 MHz, Chloroform-*d*)  $\delta$ : 8.49 (d,  $J = 8.4$  Hz, 1H), 8.35 – 8.28 (m, 1H), 7.77 (d,  $J = 8.2$  Hz, 1H), 7.70 (d,  $J = 9.0$  Hz, 1H), 7.46 (d,  $J = 7.4$  Hz, 5H), 7.41 – 7.34 (m, 4H), 7.32 – 7.29 (m, 4H), 7.21 (d,  $J = 9.0$  Hz, 1H), 7.04 (ddd,  $J = 7.4, 5.2, 1.1$  Hz, 1H), 6.93 (d,  $J = 8.1$  Hz, 1H), 5.49 (s, 1H, *enol*), 4.74 (s, 4H). (*enol*: *keto* = 3.2 :1)  $^{13}\text{C}$  NMR (126 MHz, Chloroform-*d*)  $\delta$ : 156.92, 154.16, 153.21, 151.67, 148.75, 143.29, 137.64, 136.98, 136.25, 135.59, 134.81, 134.17, 131.27, 129.00, 128.91, 128.26, 127.72, 127.51, 127.40, 127.26, 127.15, 127.06, 127.00, 126.91, 126.89, 126.86, 126.39, 126.22, 126.02, 125.93, 124.38, 123.80, 123.46, 123.37, 121.16, 120.39, 119.46, 119.12, 117.89, 107.33, 102.38, 98.97, 96.76, 90.41, 86.77, 55.43, 55.27, 52.92. HRMS(ESI)  $m/z$ : calculated for  $[\text{C}_{33}\text{H}_{26}\text{N}_2\text{O} + \text{H}]^+$  467.2123, found 467.2116.

**1j**, 4-(2-methylnaphthalen-1-yl)-1-(pyridin-2-yl)but-3-yn-2-one / (*Z*)-4-(2-methylnaphthalen-1-yl)-1-(pyridin-2-yl)but-1-en-3-yn-2-ol

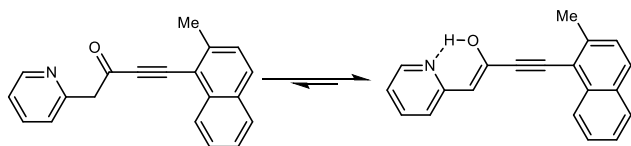

Yellow solid, m.p. 69-70 °C.  $^1\text{H}$  NMR (500 MHz, Chloroform-*d*)  $\delta$ : 8.45 (dd,  $J = 8.4, 1.0$  Hz, 1H), 8.34 (dt,  $J = 5.3, 1.3$  Hz, 1H), 7.86 (dd,  $J = 8.1, 4.5$  Hz, 1H), 7.81 (d,  $J = 8.3$  Hz, 1H), 7.68 (td,  $J = 7.8, 1.8$  Hz, 1H), 7.63 (ddd,  $J = 8.3, 6.8, 1.3$  Hz, 1H), 7.52 (ddd,  $J = 8.0, 6.8, 1.2$  Hz, 1H),

7.43 (dd,  $J = 12.4, 8.2$  Hz, 1H), 7.09 (dt,  $J = 8.1, 1.1$  Hz, 1H), 7.06 (ddd,  $J = 7.4, 5.3, 1.2$  Hz, 1H), 6.06 (s, 1H, *enol*), 2.77 (s, 3H). (*enol*: *keto* = 3.9 :1)  $^{13}\text{C}$  NMR (126 MHz, Chloroform-*d*)  $\delta$ : 156.72, 153.04, 148.89, 148.80, 143.15, 142.10, 139.25, 136.45, 136.00, 135.78, 132.99, 132.57, 130.46, 130.30, 130.06, 128.33, 127.95, 127.83, 127.21, 127.06, 126.96, 126.88, 126.59, 126.03, 124.14, 123.58, 123.30, 121.36, 120.42, 118.10, 117.09, 102.78, 96.01, 94.68, 85.96, 53.63, 20.44, 20.32. HRMS(ESI)  $m/z$ : calculated for  $[\text{C}_{20}\text{H}_{15}\text{NO} + \text{H}]^+$  286.1232, found 286.1227.

**1k**, 4-(2-ethylnaphthalen-1-yl)-1-(pyridin-2-yl)but-3-yn-2-one / (*Z*)-4-(2-ethylnaphthalen-1-yl)-1-(pyridin-2-yl)but-1-en-3-yn-2-ol

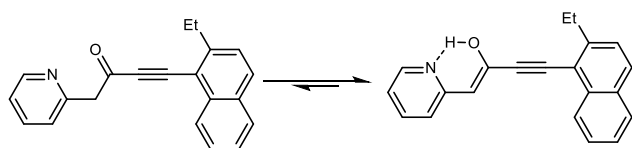

Yellow solid, m.p. 77-78 °C.  $^1\text{H}$  NMR (500 MHz, Chloroform-*d*)  $\delta$ : 8.49 (d,  $J = 8.4$  Hz, 1H), 8.31 (dd,  $J = 5.4, 1.7$  Hz, 1H), 7.86 (dd,  $J = 10.1, 8.2$  Hz, 2H), 7.65 (td,  $J = 7.6, 1.5$  Hz, 2H), 7.54 (ddd,  $J = 8.1, 6.8, 1.2$  Hz, 1H), 7.45 (d,  $J = 8.5$  Hz, 1H), 7.07 (d,  $J = 8.1$  Hz, 1H), 7.03 (ddd,  $J = 6.7, 5.4, 1.1$  Hz, 1H), 6.05 (s, 1H, *enol*), 3.16 (q,  $J = 7.6$  Hz, 2H), 1.44 (t,  $J = 7.6$  Hz, 3H). (*enol*: *keto* = 3.8 :1)  $^{13}\text{C}$  NMR (126 MHz, Chloroform-*d*)  $\delta$ : 156.66, 153.04, 148.94, 148.21, 145.36, 143.06, 136.50, 135.81, 133.08, 130.57, 130.49, 130.39, 128.37, 127.24, 127.10, 126.60, 126.05, 125.61, 125.08, 125.03, 124.72, 124.62, 123.58, 121.38, 120.44, 118.11, 116.32, 113.96, 102.76, 94.30, 85.68, 53.65, 27.54, 27.37, 14.36, 14.26. HRMS(ESI)  $m/z$ : calculated for  $[\text{C}_{21}\text{H}_{17}\text{NO} + \text{H}]^+$  300.1388, found 300.1385.

**1l**, 4-(2-butyl-naphthalen-1-yl)-1-(pyridin-2-yl)but-3-yn-2-one / (*Z*)-4-(2-butyl-naphthalen-1-yl)-1-(pyridin-2-yl)but-1-en-3-yn-2-ol

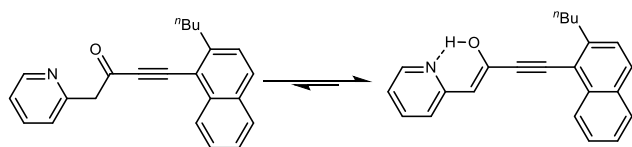

Yellow solid, m.p. 48-49 °C.  $^1\text{H}$  NMR (500 MHz, Chloroform-*d*)  $\delta$ : 8.47 (d,  $J = 8.4$  Hz, 1H), 8.37 – 8.34 (m, 1H), 7.85 (dd,  $J = 15.2, 8.4$  Hz, 2H), 7.69 (td,  $J = 7.8, 1.7$  Hz, 1H), 7.64 (ddd,  $J = 8.3, 6.8, 1.2$  Hz, 1H), 7.53 (td,  $J = 7.4, 6.6, 1.2$  Hz, 1H), 7.43 (d,  $J = 8.5$  Hz, 1H), 7.10 (d,  $J = 8.1$  Hz, 1H), 7.07 – 7.05 (m, 1H), 6.03 (s, 1H, *enol*), 3.12 (t,  $J = 7.7$  Hz, 2H), 1.84 – 1.78 (m, 2H), 1.54 – 1.50 (m, 2H), 1.05 (t,  $J = 7.4$  Hz, 3H). (*enol*: *keto* = 3.8:1)  $^{13}\text{C}$  NMR (126 MHz, Chloroform-*d*)  $\delta$ :

156.75, 148.90, 148.85, 144.15, 143.17, 136.45, 135.76, 133.06, 132.64, 130.53, 130.18, 128.08, 127.20, 127.04, 126.54, 126.27, 125.99, 125.11, 124.67, 123.53, 121.34, 120.42, 118.10, 116.70, 102.72, 94.14, 85.91, 53.61, 34.02, 33.89, 32.20, 32.14, 21.61, 21.43, 13.08, 13.05. **HRMS(ESI) m/z:** calculated for  $[C_{23}H_{21}NO + H]^+$  328.1701, found 328.1699.

**1m,** 4-(2-isopropyl-naphthalen-1-yl)-1-(pyridin-2-yl)but-3-yn-2-one / (Z)-4-(2-isopropyl-naphthalen-1-yl)-1-(pyridin-2-yl)but-1-en-3-yn-2-ol

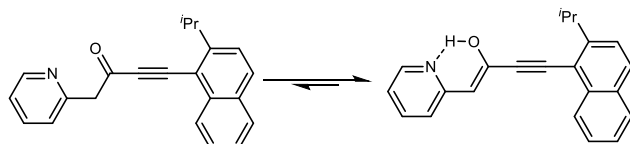

Yellow oil.  **$^1H$  NMR (500 MHz, Chloroform-*d*)**  $\delta$ : 8.52 (d,  $J = 8.4$  Hz, 1H), 8.32 – 8.30(m, 1H), 7.88 (dd,  $J = 10.8, 8.4$  Hz, 2H), 7.66 – 7.63 (m, 2H), 7.53 (d,  $J = 8.4$  Hz, 2H), 7.15 – 7.06 (m, 1H), 7.03 (ddd,  $J = 7.4, 5.3, 1.2$  Hz, 1H), 6.06 (s, 1H, *enol*), 3.92 (p,  $J = 6.9$  Hz, 1H), 1.45 (d,  $J = 7.0$  Hz, 6H). (*enol: keto = 3.8 :1*)  **$^{13}C$  NMR (126 MHz, Chloroform-*d*)**  $\delta$ : 156.66, 153.07, 152.26, 149.37, 148.98, 148.92, 145.36, 143.03, 136.51, 135.79, 133.00, 130.75, 130.62, 128.63, 127.08, 126.63, 126.08, 125.62, 125.29, 124.80, 123.59, 122.27, 122.17, 121.37, 120.44, 118.11, 115.81, 102.75, 95.97, 94.66, 88.85, 85.61, 53.65, 52.55, 31.35, 31.29, 27.54, 22.99, 22.34, 14.27. **HRMS(ESI) m/z:** calculated for  $[C_{22}H_{19}NO + H]^+$  314.1545, found 314.1541.

**1n,** 4-(2-phenyl-naphthalen-1-yl)-1-(pyridin-2-yl)but-3-yn-2-one / (Z)-4-(2-phenyl-naphthalen-1-yl)-1-(pyridin-2-yl)but-1-en-3-yn-2-ol

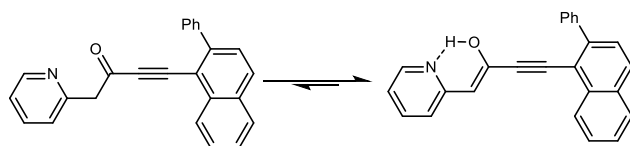

Yellow solid, m.p. 70-71 °C.  **$^1H$  NMR (500 MHz, Chloroform-*d*)**  $\delta$ : 8.62 (d,  $J = 8.6$  Hz, 1H), 8.31 (dd,  $J = 5.4, 1.7$  Hz, 1H), 7.97 (d,  $J = 8.5$  Hz, 1H), 7.94 (d,  $J = 8.3$  Hz, 1H), 7.82 (dd,  $J = 7.4, 1.7$  Hz, 2H), 7.73 – 7.71 (m, 1H), 7.68 – 7.62 (m, 2H), 7.62 (d,  $J = 4.5$  Hz, 1H), 7.61 – 7.55 (m, 2H), 7.50 (dd,  $J = 8.5, 6.3$  Hz, 1H), 7.04 (dd,  $J = 7.4, 5.4$  Hz, 1H), 7.01 (d,  $J = 8.1$  Hz, 1H), 5.73 (s, 1H, *enol*). (*enol: keto = 4.2 :1*)  **$^{13}C$  NMR (126 MHz, Chloroform-*d*)**  $\delta$ : 156.68, 148.73, 148.51, 143.21, 142.34, 139.74, 136.36, 135.62, 132.69, 131.10, 130.36, 128.83, 128.66, 128.35, 127.26, 127.20, 127.07, 127.02, 126.66, 126.47, 126.43, 126.38, 125.83, 125.52, 125.33, 123.46, 121.19,

120.40, 118.10, 116.18, 103.10, 93.54, 86.92, 53.28. **HRMS(ESI) m/z**: calculated for [C<sub>25</sub>H<sub>17</sub>NO + H]<sup>+</sup> 348.1388, found 348.1386.

**1o**, 4-([1,2'-binaphthalen]-1'-yl)-1-(pyridin-2-yl)but-3-yn-2-one / (Z)-4-([1,2'-binaphthalen]-1'-yl)-1-(pyridin-2-yl)but-1-en-3-yn-2-ol

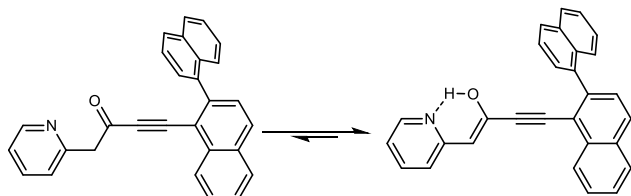

Yellow solid, m.p. 76-77 °C. **<sup>1</sup>H NMR (500 MHz, Chloroform-*d*)** δ: 8.66 (d, *J* = 8.3 Hz, 1H), 8.19 (d, *J* = 5.3 Hz, 1H), 8.03 (dt, *J* = 13.4, 7.2 Hz, 4H), 7.81 (d, *J* = 8.5 Hz, 1H), 7.74 (q, *J* = 7.1 Hz, 1H), 7.72 – 7.63 (m, 4H), 7.62 – 7.53 (m, 2H), 7.50 (t, *J* = 7.7 Hz, 1H), 7.95 – 6.93 (m, 1H), 6.79 (d, *J* = 8.1 Hz, 1H), 4.95 (d, *J* = 1.6 Hz, 1H, *enol*). (*enol*: *keto* = 3.3 :1) **<sup>13</sup>C NMR (126 MHz, Chloroform-*d*)** δ: 156.46, 152.38, 148.54, 148.08, 144.04, 143.09, 141.66, 137.94, 137.18, 136.25, 135.41, 132.69, 132.67, 132.39, 131.37, 130.87, 129.96, 127.87, 127.65, 127.52, 127.46, 127.43, 127.23, 127.17, 127.15, 127.02, 126.98, 126.54, 126.10, 125.82, 125.76, 125.54, 125.39, 125.32, 125.15, 125.11, 125.06, 124.81, 124.30, 124.27, 123.25, 121.01, 120.31, 118.51, 117.99, 103.17, 94.78, 94.32, 86.68, 53.03. **HRMS(ESI) m/z**: calculated for [C<sub>29</sub>H<sub>19</sub>NO + H]<sup>+</sup> 398.1545, found 398.1546.

**1p**, 4-(2-bromonaphthalen-1-yl)-1-(pyridin-2-yl)but-3-yn-2-one / (Z)-4-(2-bromonaphthalen-1-yl)-1-(pyridin-2-yl)but-1-en-3-yn-2-ol

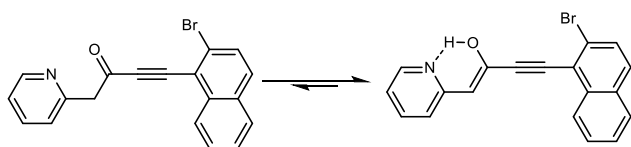

Yellow solid, m.p. 106-107 °C. **<sup>1</sup>H NMR (500 MHz, Chloroform-*d*)** δ: 8.40 (dd, *J* = 8.3, 1.1 Hz, 1H), 8.31 – 8.30 (m, 1H), 7.81 (d, *J* = 8.0 Hz, 1H), 7.75 (d, *J* = 8.8 Hz, 1H), 7.71 (d, *J* = 3.5 Hz, 1H), 7.70 – 7.65 (m, 2H), 7.62 – 7.57 (m, 1H), 7.13 – 7.11 (m, 1H), 7.10 – 7.07 (m, 1H), 6.06 (s, 1H, *enol*). (*enol*: *keto* = 10.5 :1) **<sup>13</sup>C NMR (126 MHz, Chloroform-*d*)** δ: 156.57, 148.24, 143.19, 136.54, 133.42, 130.60, 129.10, 128.55, 127.24, 126.97, 125.79, 125.39, 124.30, 120.60, 120.29, 118.35, 103.59, 94.85, 85.57, 53.55. **HRMS(ESI) m/z**: calculated for [C<sub>19</sub>H<sub>12</sub>BrNO + H]<sup>+</sup> 350.0181, found 350.0171.

**1q**, 4-(2-chloronaphthalen-1-yl)-1-(pyridin-2-yl)but-3-yn-2-one / (Z)-4-(2-chloronaphthalen-1-yl)-1-(pyridin-2-yl)but-1-en-3-yn-2-ol

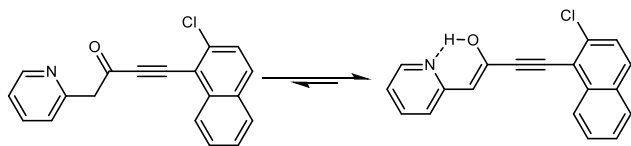

Yellow solid, m.p. 111-112 °C. <sup>1</sup>H NMR (500 MHz, Chloroform-*d*) δ: 8.43 (dd, *J* = 8.4, 1.0 Hz, 1H), 8.36 (dt, *J* = 5.2, 1.2 Hz, 1H), 7.88 (d, *J* = 8.1 Hz, 1H), 7.82 (d, *J* = 8.7 Hz, 1H), 7.72 – 7.66 (m, 2H), 7.58 (ddd, *J* = 8.2, 6.9, 1.2 Hz, 1H), 7.55 (d, *J* = 8.7 Hz, 1H), 7.13 – 7.09 (m, 2H), 6.11 (s, 1H, *enol*). (*enol*: *keto* = 6.3 :1) <sup>13</sup>C NMR (126 MHz, Chloroform-*d*) δ: 156.59, 148.14, 143.24, 136.52, 134.45, 133.09, 130.32, 129.09, 127.20, 126.96, 125.83, 125.65, 125.19, 120.60, 118.36, 117.77, 103.62, 98.94, 95.55, 83.71. HRMS(ESI) *m/z*: calculated for [C<sub>19</sub>H<sub>12</sub>ClNO + Na]<sup>+</sup> 328.0505, found 328.0503.

**1r**, 1-(3-bromopyridin-2-yl)-4-(2-ethoxynaphthalen-1-yl)but-3-yn-2-one / (Z)-1-(3-bromopyridin-2-yl)-4-(2-ethoxynaphthalen-1-yl)but-1-en-3-yn-2-ol

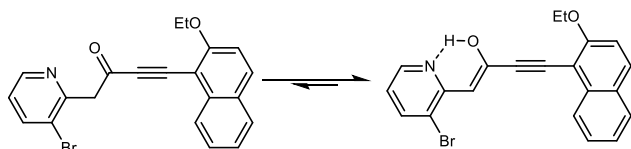

Yellow solid, m.p. 86-87 °C. <sup>1</sup>H NMR (500 MHz, Chloroform-*d*) δ: 8.36 (d, *J* = 8.5 Hz, 1H), 8.34 (dd, *J* = 4.9, 1.4 Hz, 1H), 7.92 (dd, *J* = 7.9, 1.4 Hz, 1H), 7.89 (d, *J* = 9.0 Hz, 1H), 7.83 (d, *J* = 8.2 Hz, 1H), 7.63 (ddd, *J* = 8.3, 6.8, 1.2 Hz, 1H), 7.46 – 7.43 (m, 2H), 7.29 (d, *J* = 9.0 Hz, 1H), 6.53 (s, 1H, *enol*), 4.55 (s, 1H, *keto*), 4.37 (t, *J* = 7.0 Hz, 2H), 1.61 (t, *J* = 7.0 Hz, 3H). (*enol*:*keto* = 2.7 :1) <sup>13</sup>C NMR (126 MHz, Chloroform-*d*) δ: 160.44, 158.53, 155.46, 149.17, 147.10, 142.78, 140.07, 139.35, 133.89, 133.45, 132.37, 130.20, 127.46, 127.25, 127.12, 127.08, 126.61, 124.30, 123.83, 123.55, 123.39, 122.71, 121.63, 119.05, 115.71, 113.24, 112.58, 104.53, 101.47, 94.50, 85.41, 64.47, 64.2, 53.11, 52.43, 14.08, 13.95. HRMS(ESI) *m/z*: calculated for [C<sub>21</sub>H<sub>16</sub>BrNO<sub>2</sub> + H]<sup>+</sup> 394.0443, found 394.0442.

**1s**, 1-(4-bromopyridin-2-yl)-4-(2-ethoxynaphthalen-1-yl)but-3-yn-2-one / (Z)-1-(4-bromopyridin-2-yl)-4-(2-ethoxynaphthalen-1-yl)but-1-en-3-yn-2-ol

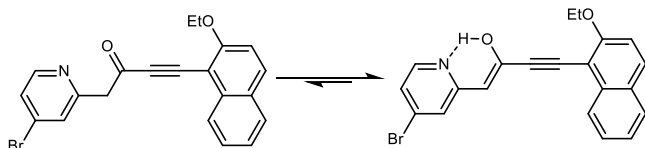

Yellow solid, m.p. 81-82 °C. **<sup>1</sup>H NMR (500 MHz, Chloroform-*d*)**  $\delta$ : 8.35 – 8.33 (m, 1H), 8.20 (d,  $J = 5.6$  Hz, 1H), 7.88 (d,  $J = 9.0$  Hz, 1H), 7.84 – 7.82 (m, 1H), 7.62 (ddd,  $J = 8.3, 6.8, 1.2$  Hz, 1H), 7.45 (ddd,  $J = 8.1, 6.7, 1.2$  Hz, 2H), 7.29 – 7.28 (m, 1H), 7.23 (dd,  $J = 5.6, 1.8$  Hz, 1H), 5.98 (s, 1H, *enol*), 4.38 – 4.35 (m, 2H), 1.60 – 1.56 (m, 3H). (*enol*: *keto* = 2.2 :1) **<sup>13</sup>C NMR (126 MHz, Chloroform-*d*)**  $\delta$ : 160.52, 158.40, 158.02, 154.55, 149.39, 148.69, 144.89, 133.90, 133.49, 132.73, 132.57, 130.19, 127.44, 127.31, 127.28, 127.15, 127.09, 126.92, 126.61, 124.66, 124.23, 123.75, 123.62, 123.38, 123.10, 121.54, 113.16, 112.41, 104.44, 102.43, 96.54, 94.12, 88.50, 64.40, 64.20, 53.05, 14.08, 13.96. **HRMS(ESI) m/z**: calculated for [C<sub>21</sub>H<sub>16</sub>BrNO<sub>2</sub> + H]<sup>+</sup> 416.0262, found 416.0257.

**1t**, 1-(4-chloropyridin-2-yl)-4-(2-ethoxynaphthalen-1-yl)but-3-yn-2-one / (*Z*)-1-(4-chloropyridin-2-yl)-4-(2-ethoxynaphthalen-1-yl)but-1-en-3-yn-2-ol

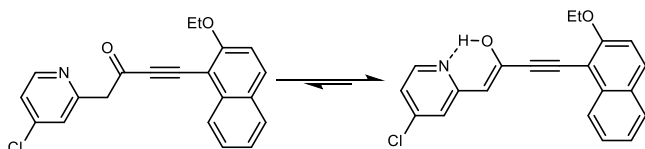

Yellow solid, m.p. 69-70 °C. **<sup>1</sup>H NMR (500 MHz, Chloroform-*d*)**  $\delta$ : 8.34 (d,  $J = 8.4$  Hz, 1H), 8.29 (d,  $J = 5.6$  Hz, 1H), 7.89 (d,  $J = 9.0$  Hz, 1H), 7.83 (t,  $J = 7.2$  Hz, 1H), 7.66 – 7.58 (m, 1H), 7.45 (ddd,  $J = 8.0, 6.8, 1.1$  Hz, 1H), 7.29 (d,  $J = 9.2$  Hz, 1H), 7.11 (d,  $J = 2.0$  Hz, 1H), 7.08 (dd,  $J = 5.6, 2.0$  Hz, 1H), 6.00 (s, 1H, *enol*), 4.39 – 4.34 (m, 2H), 1.58 (dt,  $J = 15.2, 6.9$  Hz, 3H). (*enol*: *keto* = 2.3 :1). **<sup>13</sup>C NMR (126 MHz, Chloroform-*d*)**  $\delta$ : 160.50, 158.40, 158.20, 154.68, 149.53, 148.68, 145.14, 143.98, 143.59, 133.91, 133.50, 132.55, 130.17, 127.45, 127.28, 127.09, 126.60, 124.24, 123.93, 123.76, 123.62, 123.38, 121.68, 119.97, 118.67, 113.20, 112.43, 104.49, 102.58, 94.11, 85.16, 64.42, 64.21, 53.13, 14.08, 13.94. **HRMS(ESI) m/z**: calculated for [C<sub>21</sub>H<sub>16</sub>ClNO<sub>2</sub> + H]<sup>+</sup> 350.0948, found 350.0945.

**1u**, 1-(5-bromopyridin-2-yl)-4-(2-ethoxynaphthalen-1-yl)but-3-yn-2-one / (*Z*)-1-(5-bromopyridin-2-yl)-4-(2-ethoxynaphthalen-1-yl)but-1-en-3-yn-2-ol

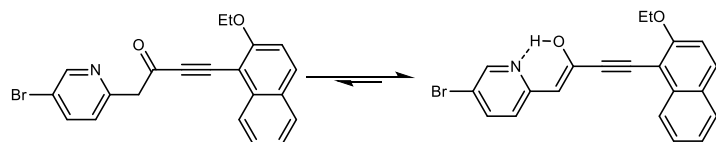

Yellow solid, m.p. 103-104 °C.  $^1\text{H NMR}$  (500 MHz, Chloroform-*d*)  $\delta$ : 8.49 (d,  $J = 2.3$  Hz, 1H), 8.34 (d,  $J = 8.4$  Hz, 1H), 7.87 (dd,  $J = 8.7, 3.4$  Hz, 1H), 7.83 (d,  $J = 7.9$  Hz, 1H), 7.78 (dd,  $J = 8.5, 2.4$  Hz, 1H), 7.65 – 7.58 (m, 1H), 7.44 (t,  $J = 7.5$  Hz, 2H), 7.28 (d,  $J = 9.1$  Hz, 1H), 7.00 (d,  $J = 8.5$  Hz, 1H), 6.03 (s, 1H, *enol*), 4.35 (q,  $J = 7.0$  Hz, 2H), 1.58 (t,  $J = 7.0$  Hz, 3H). (*enol*: *keto* = 2.4 :1)  $^{13}\text{C NMR}$  (126 MHz, Chloroform-*d*)  $\delta$ : 160.45, 158.33, 155.53, 149.79, 146.54, 146.00, 138.77, 138.19, 133.89, 133.47, 132.55, 130.11, 127.45, 127.28, 127.26, 127.10, 126.58, 124.89, 124.22, 123.73, 123.63, 123.37, 121.62, 118.52, 114.10, 113.20, 112.42, 104.53, 103.32, 94.00, 88.45, 85.25, 64.39, 64.18, 52.84, 14.08, 13.95. HRMS(ESI)  $m/z$ : calculated for  $[\text{C}_{21}\text{H}_{16}\text{BrNO}_2 + \text{H}]^+$  394.0443, found 394.0433.

**1v**, 4-(2-ethoxynaphthalen-1-yl)-1-(5-methylpyridin-2-yl)but-3-yn-2-one / (Z)-4-(2-ethoxynaphthalen-1-yl)-1-(5-methylpyridin-2-yl)but-1-en-3-yn-2-ol

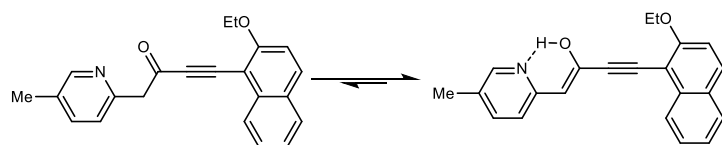

Yellow solid, m.p. 75-76 °C.  $^1\text{H NMR}$  (500 MHz, Chloroform-*d*)  $\delta$ : 8.37 (dd,  $J = 8.4, 1.0$  Hz, 1H), 8.21 (d,  $J = 2.0$  Hz, 1H), 7.87 (d,  $J = 9.0$  Hz, 1H), 7.85 – 7.77 (m, 1H), 7.61 (ddd,  $J = 8.3, 6.8, 1.3$  Hz, 1H), 7.57 – 7.54 (m, 1H), 7.44 (ddd,  $J = 8.2, 6.8, 1.2$  Hz, 1H), 7.29 (d,  $J = 9.1$  Hz, 1H), 7.02 (d,  $J = 8.2$  Hz, 1H), 6.03 (s, 1H, *enol*), 4.36 (q,  $J = 7.0$  Hz, 2H), 2.38 (s, 3H), 1.59 (t,  $J = 7.0$  Hz, 3H). (*enol*: *keto* = 2 :1)  $^{13}\text{C NMR}$  (126 MHz, Chloroform-*d*)  $\delta$ : 158.12, 154.44, 149.14, 147.05, 143.59, 137.19, 136.21, 133.53, 132.29, 129.74, 127.94, 127.50, 127.19, 127.07, 127.01, 126.44, 124.41, 123.94, 123.55, 123.31, 123.03, 119.99, 113.41, 112.56, 103.08, 96.65, 94.72, 83.82, 64.48, 64.23, 53.20, 17.30, 17.18, 14.10, 13.94. HRMS(ESI)  $m/z$ : calculated for  $[\text{C}_{22}\text{H}_{19}\text{NO}_2 + \text{H}]^+$  330.1494, found 330.1492.

**1w**, 4-(2-ethoxynaphthalen-1-yl)-1-(pyrazin-2-yl)but-3-yn-2-one / (Z)-4-(2-ethoxynaphthalen-1-yl)-1-(pyrazin-2-yl)but-1-en-3-yn-2-ol

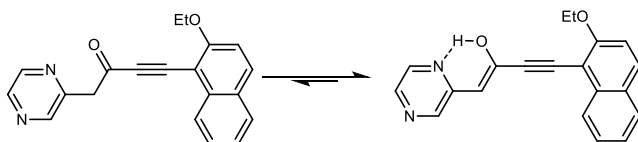

Yellow solid, m.p. 85-86 °C. **<sup>1</sup>H NMR (500 MHz, Chloroform-*d*)**  $\delta$ : 8.47 (d,  $J = 1.5$  Hz, 1H), 8.36 (d,  $J = 2.8$  Hz, 1H), 8.35 – 8.33 (m, 2H), 7.88 (d,  $J = 9.0$  Hz, 1H), 7.82 (t,  $J = 8.3$  Hz, 1H), 7.61 (dddd,  $J = 12.2, 8.4, 6.9, 1.3$  Hz, 1H), 7.44 (dddd,  $J = 8.1, 6.9, 2.9, 1.2$  Hz, 1H), 7.28 (d,  $J = 9.1$  Hz, 1H), 6.12 (s, 1H, *enol*), 4.39 – 4.33 (m, 2H), 1.61 – 1.56 (m, 3H), (*enol: keto = 1.1 :1*) **<sup>13</sup>C NMR (126 MHz, Chloroform-*d*)**  $\delta$ : 160.55, 158.51, 152.54, 149.11, 148.20, 144.92, 143.45, 142.77, 142.28, 139.05, 138.98, 133.89, 133.44, 132.72, 130.41, 127.40, 127.34, 127.32, 127.15, 127.12, 126.70, 124.11, 123.67, 123.65, 123.42, 113.03, 112.27, 104.12, 101.55, 100.95, 96.43, 93.55, 88.99, 86.04, 64.34, 64.13, 50.82, 14.06, 13.92. **HRMS(ESI) *m/z***: calculated for [C<sub>22</sub>H<sub>16</sub>N<sub>2</sub>O<sub>2</sub> + H]<sup>+</sup> 317.1290, found 317.1282.

**1x**, 4-(2-ethoxynaphthalen-1-yl)-1-(5-(4-(((3*aS*,5*aR*,8*aR*,8*bS*)-2,2,7,7-tetramethyltetrahydro-3*aH*-bis([1,3]dioxolo)[4,5-*b*:4',5'-*d*]pyran-3*a*-yl)methoxy)methyl)phenyl)pyridin-2-yl)but-3-yn-2-one / (*Z*)-4-(2-ethoxynaphthalen-1-yl)-1-(5-(4-(((3*aS*,5*aR*,8*aR*,8*bS*)-2,2,7,7-tetramethyltetrahydro-3*aH*-bis([1,3]dioxolo)[4,5-*b*:4',5'-*d*]pyran-3*a*-yl)methoxy)methyl)phenyl)pyridin-2-yl)but-1-en-3-yn-2-ol

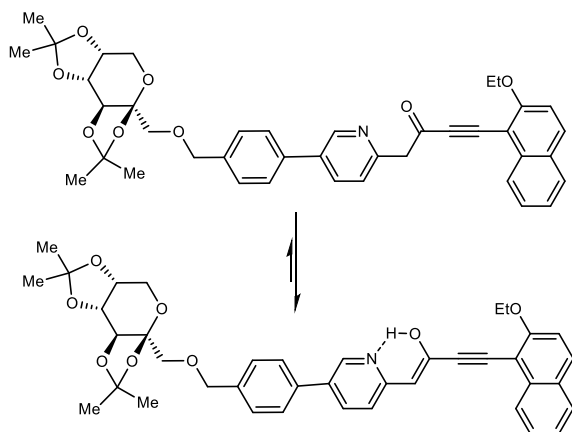

Yellow oil. **<sup>1</sup>H NMR (500 MHz, Chloroform-*d*)**  $\delta$ : 8.64 (d,  $J = 2.2$  Hz, 1H), 8.38 (dd,  $J = 8.6, 1.0$  Hz, 1H), 7.91 (dd,  $J = 8.4, 2.3$  Hz, 1H), 7.88 (d,  $J = 9.0$  Hz, 1H), 7.84 (d,  $J = 8.1$  Hz, 1H), 7.63 – 7.60 (m, 4H), 7.53 – 7.50 (m, 4H), 7.46 – 7.45 (m, 1H), 7.31 (s, 1H), 7.29 (d,  $J = 9.0$  Hz, 1H), 7.18 (dd,  $J = 8.4, 0.7$  Hz, 1H), 6.11 (s, 1H, *enol*), 4.78 (s, 1H), 4.71 (d,  $J = 1.9$  Hz, 1H), 4.68 – 4.66 (m, 2H), 4.51 (t,  $J = 2.6$  Hz, 1H), 4.39 – 4.36 (m, 3H), 3.99 (dd,  $J = 13.0, 2.0$  Hz, 1H), 3.81



(dd,  $J = 13.0, 0.8$  Hz, 1H), 3.74 – 3.68 (m, 3H), 1.62 (s, 3H), 1.61 (s, 3H), 1.50 (s, 3H), 1.48 (s, 3H), 1.40 (s, 3H). (*enol*: *keto* = 2.8 :1)  $^{13}\text{C}$  NMR (126 MHz, Chloroform-*d*)  $\delta$ : 158.24, 155.67, 147.68, 142.18, 137.09, 135.44, 134.49, 133.94, 133.52, 132.40, 131.12, 129.93, 127.48, 127.32, 127.23, 127.06, 126.52, 126.01, 125.54, 124.36, 123.85, 123.58, 123.35, 120.38, 113.30, 107.92, 107.59, 103.16, 101.68, 94.60, 84.58, 72.25, 70.68, 70.00, 69.20, 69.16, 64.45, 64.22, 60.02, 53.27, 25.60, 24.85, 24.46, 23.04, 14.11, 13.97. HRMS(ESI)  $m/z$ : calculated for  $[\text{C}_{40}\text{H}_{41}\text{NO}_8 + \text{H}]^+$  664.2910, found 664.2906.

**1y**, 4-(2-ethoxynaphthalen-1-yl)-1-(5-(4-(((*R*)-2,5,7,8-tetramethyl-2-((4*S*,8*R*))-4,8,12-trimethyltridecyl)chroman-6-yl)oxy)methyl)phenyl)pyridin-2-yl)but-3-yn-2-one / (*Z*)-4-(2-ethoxynaphthalen-1-yl)-1-(5-(4-(((*R*)-2,5,7,8-tetramethyl-2-((4*S*,8*R*))-4,8,12-trimethyltridecyl)chroman-6-yl)oxy)methyl)phenyl)pyridin-2-yl)but-1-en-3-yn-2-ol

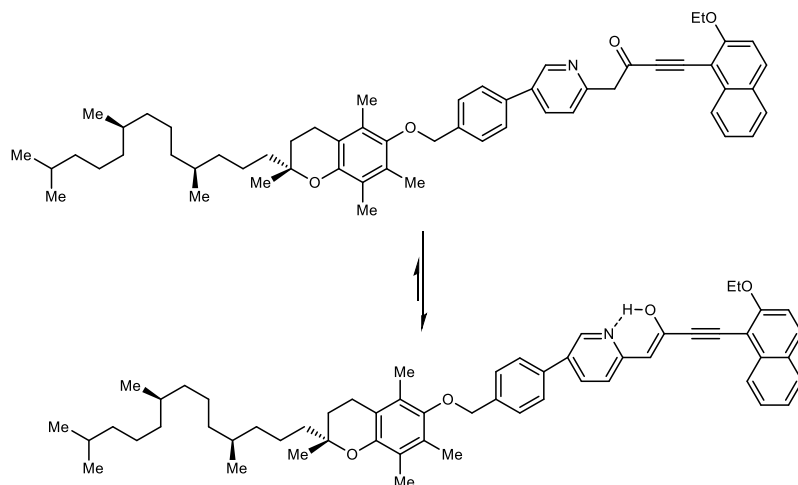

Yellow oil.  $^1\text{H}$  NMR (500 MHz, Chloroform-*d*)  $\delta$ : 8.66 (d,  $J = 2.3$  Hz, 1H), 8.44 (d,  $J = 2.8$  Hz, 1H), 7.95 – 7.90 (m, 1H), 7.88 (d,  $J = 9.0$  Hz, 1H), 7.85 (d,  $J = 8.1$  Hz, 1H), 7.72 – 7.63 (m, 5H), 7.47 (t,  $J = 7.5$  Hz, 1H), 7.29 (d,  $J = 9.1$  Hz, 1H), 7.17 (d,  $J = 8.4$  Hz, 1H), 6.14 (s, 1H, *enol*), 4.83 (d,  $J = 2.5$  Hz, 2H), 4.37 (q,  $J = 7.0$  Hz, 2H), 2.69 (t,  $J = 6.8$  Hz, 2H), 2.34 (s, 3H), 2.29 (s, 3H), 2.23 (s, 3H), 1.99 – 1.82 (m, 2H), 1.63 (dt,  $J = 13.7, 6.8$  Hz, 4H), 1.57 (d,  $J = 6.9$  Hz, 3H), 1.54 – 1.46 (m, 2H), 1.37 (d,  $J = 20.0$  Hz, 12H), 1.25 (ddt,  $J = 9.3, 6.6, 4.0$  Hz, 2H), 1.22 – 1.11 (m, 4H), 1.06 – 0.93 (m, 11H), 0.90 (d,  $J = 6.9$  Hz, 1H). (*enol*: *keto* = 4 :1)  $^{13}\text{C}$  NMR (126 MHz, Chloroform-*d*)  $\delta$ : 158.30, 155.71, 147.76, 147.13, 147.04, 142.20, 137.02, 135.64, 134.52, 134.01, 133.95, 133.56, 132.46, 131.10, 129.99, 127.52, 127.42, 127.37, 127.29, 127.22, 127.13, 126.90, 126.57, 126.19, 125.69, 124.94, 124.37, 123.85, 123.56, 123.38, 122.02, 120.45, 116.69,

113.27, 112.48, 104.79, 103.25, 96.79, 94.78, 84.71, 76.40, 76.15, 75.90, 73.88, 73.23, 70.51, 64.41, 64.21, 53.31, 49.16, 44.13, 39.09, 38.44, 36.53, 36.49, 36.36, 33.61, 31.86, 31.76, 30.68, 30.38, 27.04, 24.88, 23.88, 23.52, 22.94, 22.21, 21.81, 21.72, 21.29, 20.09, 19.76, 18.84, 18.75, 15.18, 14.15, 14.01, 11.97, 11.10, 10.93. **HRMS(ESI) m/z:** calculated for  $[C_{57}H_{71}NO_4 + H]^+$  834.5641, found 834.5633.

**1z**, 4-(2-ethoxynaphthalen-1-yl)-1-(5-(4-(((1*R*,2*S*,5*R*)-2-isopropyl-5-methylcyclohexyl)oxy)methyl)phenyl)pyridin-2-yl)but-3-yn-2-one / (Z)-4-(2-ethoxynaphthalen-1-yl)-1-(5-(4-(((1*R*,2*S*,5*R*)-2-isopropyl-5-methylcyclohexyl)oxy)-methyl)phenyl)pyridin-2-yl)but-1-en-3-yn-2-ol

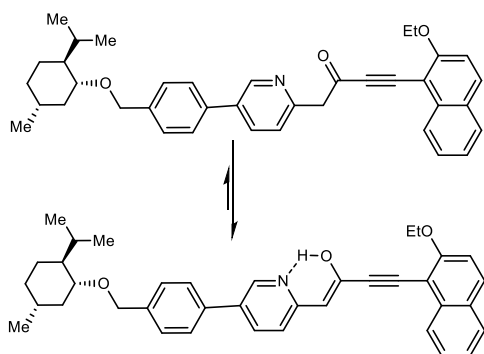

Yellow oil. **<sup>1</sup>H NMR (500 MHz, Chloroform-*d*)**  $\delta$ : 8.63 (d,  $J = 2.2$  Hz, 1H), 8.40 – 8.38 (m, 1H), 7.90 (dd,  $J = 8.4, 2.3$  Hz, 1H), 7.87 (d,  $J = 9.2$  Hz, 1H), 7.82 (dd,  $J = 9.1, 7.8$  Hz, 2H), 7.61 – 7.59 (m, 3H), 7.52 – 7.51 (m, 3H), 7.45 (ddd,  $J = 8.0, 6.7, 1.2$  Hz, 1H), 7.28 (d,  $J = 9.1$  Hz, 1H), 7.16 (d,  $J = 8.3$  Hz, 1H), 6.11 (s, 1H, *enol*), 4.77 (d,  $J = 11.6$  Hz, 1H), 4.50 (d,  $J = 11.6$  Hz, 1H), 4.36 (q,  $J = 7.0$  Hz, 2H), 3.27 (td,  $J = 10.6, 4.0$  Hz, 2H), 2.65 (s, 1H), 2.39 (dddt,  $J = 13.9, 6.8, 4.9, 2.5$  Hz, 2H), 2.27 (dt,  $J = 12.0, 2.0$  Hz, 2H), 1.71 (ddd,  $J = 13.5, 10.8, 3.1$  Hz, 4H), 1.60 (t,  $J = 7.0$  Hz, 3H), 1.41 – 1.37 (m, 1H), 1.02 – 0.97 (m, 10H), 0.81 (dd,  $J = 7.0, 4.1$  Hz, 6H). (*enol*: *keto* = 3.8 :1)

**<sup>13</sup>C NMR (126 MHz, Chloroform-*d*)**  $\delta$ : 158.24, 156.10, 155.61, 151.80, 147.65, 147.10, 146.44, 142.16, 138.18, 137.88, 135.98, 135.60, 135.29, 134.50, 133.95, 133.64, 133.52, 132.54, 132.42, 131.23, 129.94, 127.57, 127.51, 127.47, 127.44, 127.23, 127.19, 127.07, 126.53, 126.02, 125.88, 125.55, 124.36, 123.84, 123.58, 123.48, 123.35, 122.16, 120.38, 113.26, 112.46, 104.78, 103.19, 94.67, 84.58, 78.01, 77.96, 69.03, 68.98, 64.41, 53.28, 47.34, 39.33, 33.57, 30.59, 24.60, 24.58, 23.11, 22.28, 21.42, 20.06, 15.16, 15.13, 14.11, 13.97. **HRMS(ESI) m/z:** calculated for  $[C_{38}H_{41}NO_3 + H]^+$  560.3165, found 560.3154.

## General procedure F: Initial studies for the synthesis of 2a

To a vial was added catalyst (10 mol%), ligand (15 mol%), solvent (1.0 mL) and stirring bar. The vial was wrapped with Teflon tape and fitted with corresponding cap. The vial was stirred at room temperature for 30 min. Then the substrate **1a** (0.1 mmol, 1.0 eq) was added. The vial was stirred at 20 °C for a certain time. After the completion of the reaction detected by TLC, the mixture was diluted with DCM and washed with water for three times. The extracts were dried and concentrated in vacuo. The crude product was purified by column chromatograph over silica gel. The ee values were determined by chiral HPLC.

## Optimization of reaction conditions

Supplementary Table 1. Optimization of the catalyst.<sup>a</sup>

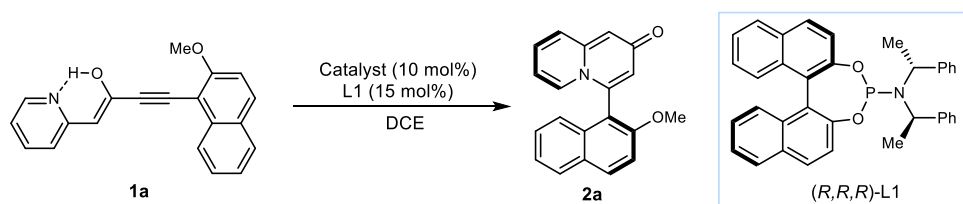

| Entry | Catalyst                                           | ee   |
|-------|----------------------------------------------------|------|
| 1     | Cu <sub>2</sub> O                                  | 63%  |
| 2     | [CuOTf] <sub>2</sub> C <sub>6</sub> H <sub>6</sub> | 33%  |
| 3     | CuOAc                                              | 60%  |
| 4     | CuF                                                | 64%  |
| 5     | CuCl                                               | 73%  |
| 6     | CuBr                                               | 65%  |
| 7     | CuI                                                | 54%  |
| 8     | Cu(MeCN) <sub>4</sub> PF <sub>6</sub>              | 61%  |
| 9     | CuBF <sub>4</sub>                                  | 36%  |
| 10    | (R)-TRIP-Cu                                        | 5%   |
| 11    | CuF <sub>2</sub>                                   | 62%  |
| 12    | Cu(OAc) <sub>2</sub>                               | 60%  |
| 13    | Cu(OTf) <sub>2</sub>                               | 46%  |
| 14    | CuSO <sub>4</sub>                                  | 69%  |
| 15    | AgOTf                                              | 29%  |
| 16    | Pd(PPh <sub>3</sub> ) <sub>2</sub> Cl <sub>2</sub> | N.D. |

<sup>a</sup>Reaction conditions: **1a** (0.1 mmol, 1.0 eq), catalyst (10 mol%), L1 (15 mol%), DCE (1.0 mL), 20 °C for 3 d. The ee values were determined by chiral HPLC.

**Supplementary Table 2. Effect of the solvent for the reaction <sup>a</sup>**

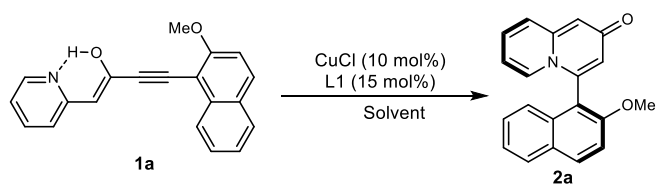

| Entry | Solvent           | ee   |
|-------|-------------------|------|
| 1     | Toluene           | 76%  |
| 2     | DCM               | 72%  |
| 3     | DCE               | 73%  |
| 4     | CHCl <sub>3</sub> | 70%  |
| 5     | MeCN              | 56%  |
| 6     | Et <sub>2</sub> O | 64%  |
| 7     | THF               | 69%  |
| 8     | MeOH              | 69%  |
| 9     | Dioxane           | 66%  |
| 10    | MTBE              | 60%  |
| 11    | Benzene           | 73%  |
| 12    | DMF               | N.D. |

<sup>a</sup> Reaction conditions: **1a** (0.1 mmol, 1.0 eq), CuCl (10 mol%), L1 (15 mol%), solvent (1.0 mL), 20 °C for 3 d. The ee values were determined by chiral HPLC.

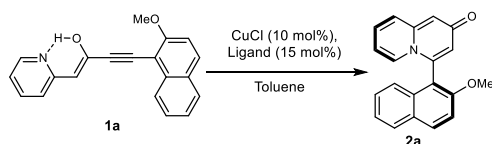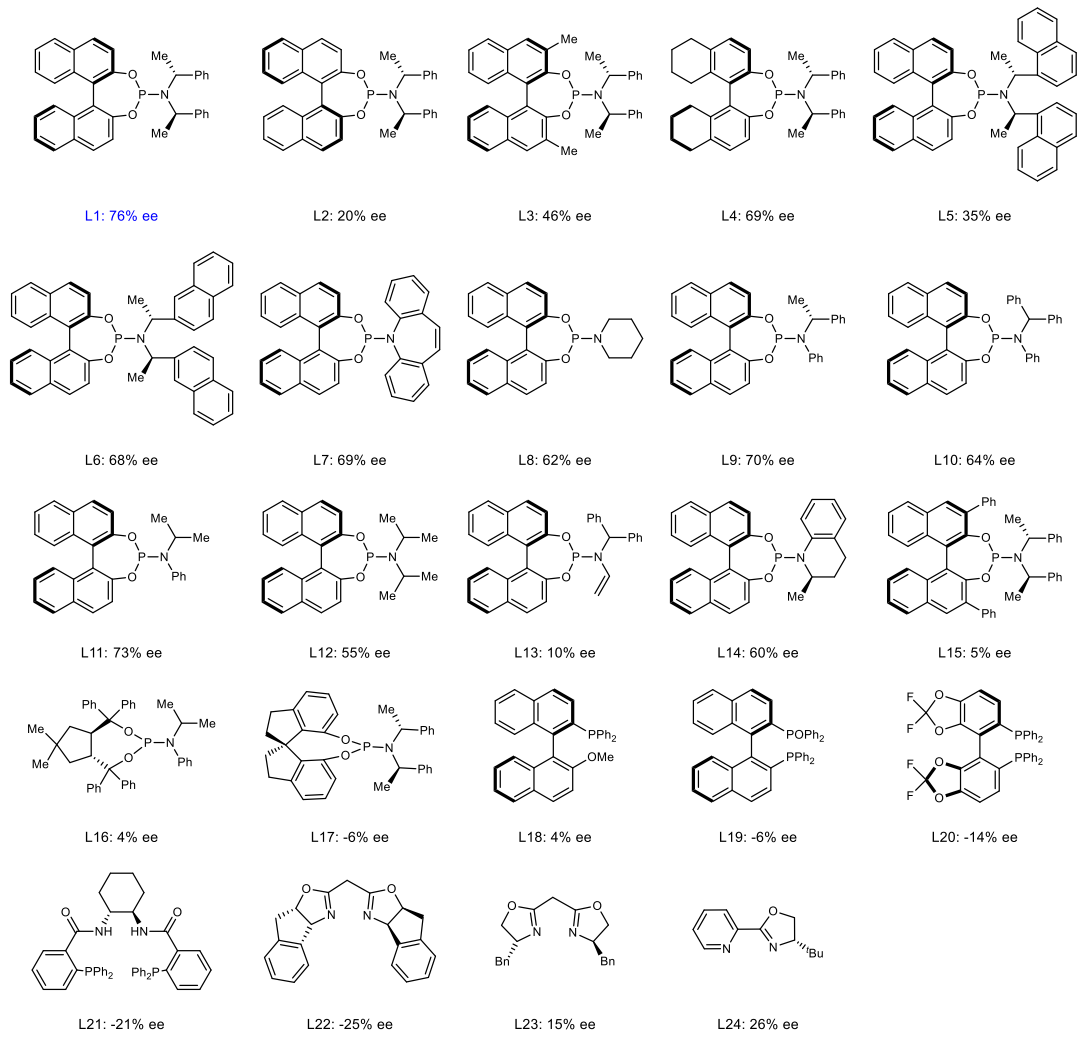

**Supplementary Fig. 1. Effect of the Ligand for the reaction.** Reaction conditions: **1a** (0.1 mmol, 1.0 eq), CuCl (10 mol%), Ligand (15 mol%), toluene (1.0 mL), 20 °C for 3 d. The ee values were determined by chiral HPLC.

#### General procedure G: Comparison of (PhO)<sub>2</sub>POOH and CPA for the reaction

To a vial was added of CuCl (1.0 mg, 10 mol%), L1 (8.5 mg, 15 mol%), toluene (2.0 mL) and stirring bar. The vial was wrapped with Teflon tape and fitted with corresponding cap. The vial was stirred at room temperature for 30 min. Then corresponding substrate (0.1 mmol, 1.0 eq) and phosphoric acid (0.1 mmol, 1.0 eq) were added into the mixture. The reaction was stirred at 20 °C for 36 h. Then, the mixture was diluted with EA and washed with water for three times. The

extracts were dried over anhydrous Na<sub>2</sub>SO<sub>4</sub> and concentrated under the vacuum. The product was purified by column chromatograph over silica gel. The ee values were determined by chiral HPLC.

**Supplementary Table 3. Comparison of (PhO)<sub>2</sub>POOH and CPA for the reaction <sup>a</sup>**

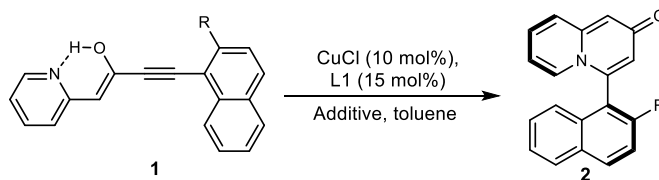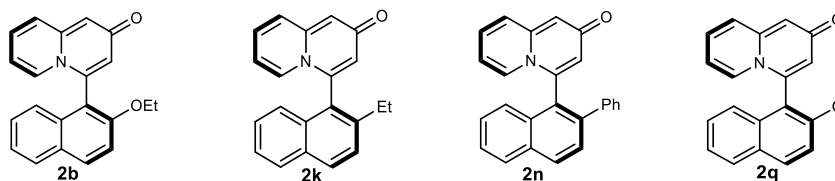

|                         | ee  | yield | ee  | yield | ee  | yield | ee  | yield |
|-------------------------|-----|-------|-----|-------|-----|-------|-----|-------|
| (PhO) <sub>2</sub> POOH | 80% | 85%   | 86% | 90%   | 94% | 95%   | 63% | 70%   |
| ( <i>rac</i> )-CPA      | 91% | 89%   | 88% | 97%   | 92% | 91%   | 62% | 72%   |
| ( <i>R</i> )-CPA        | 92% | 88%   | 88% | 94%   | 93% | 93%   | 62% | 73%   |

<sup>a</sup> Reaction conditions: **1** (0.1 mmol, 1.0 eq), CuCl (10 mol%), L1 (15 mol%), additive (0.1 mmol, 1.0 eq), toluene (2.0 mL), 20 °C for 3 d. The ee values were determined by chiral HPLC.

#### General procedure H: Synthesis of the enantioenriched products **2**

To a vial was added of CuCl (1.0 mg, 10 mol%), L1 (8.5 mg, 15 mol%), toluene (2.0 mL) and stirring bar. The vial was wrapped with Teflon tape and fitted with corresponding cap. The vial was stirred at room temperature for 30 min. Then the corresponding substrate (0.1 mmol, 1.0 eq) and chiral phosphoric acid (34.8 mg, 0.1 mmol, 1.0 eq) were added. The reaction was stirred at 20 °C for 36 h. Then, the mixture was diluted with EA and washed with water for three times. The extracts were dried and concentrated in vacuo. The crude product was purified by column chromatograph over silica gel. The ee values were determined by chiral HPLC.

#### **2a**, 4-(2-methoxynaphthalen-1-yl)-2*H*-quinolizin-2-one

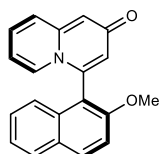

Following the general procedure **H**, **2a** was afforded as yellow solid (24.7 mg, 82 % yield), m.p. 91-92 °C.  $[\alpha]_{\text{D}}^{25} +70.0$  ( $c = 0.5$ ,  $\text{CHCl}_3$ ).  $^1\text{H NMR}$  (500 MHz, Chloroform-*d*)  $\delta$ : 8.12 (d,  $J = 9.1$  Hz, 1H), 7.93 (dd,  $J = 6.1, 3.4$  Hz, 1H), 7.46 – 7.43 (m, 3H), 7.36 – 7.30 (m, 3H), 7.13 (dd,  $J = 9.0, 6.4$  Hz, 1H), 6.84 (d,  $J = 4.9$  Hz, 2H), 6.39 (t,  $J = 6.9$  Hz, 1H), 3.90 (s, 3H).  $^{13}\text{C NMR}$  (126 MHz, Chloroform-*d*)  $\delta$ : 175.95, 154.90, 145.16, 141.46, 133.01, 132.25, 130.31, 128.90, 128.52, 128.41, 126.26, 125.71, 124.67, 123.69, 123.12, 115.90, 113.67, 112.70, 110.80, 56.47. **HRMS(ESI) m/z**: calculated for  $[\text{C}_{20}\text{H}_{15}\text{NO}_2 + \text{H}]^+$  302.1181, found 302.1176. **HPLC data** (Chiralpak AD column, hexane : isopropanol = 70 : 30, 1.0 mL/min):  $t_{\text{r}} = 19.2$  min (major),  $t_{\text{r}} = 31.1$  min (minor), ee = 76%.

**2b**, 4-(2-ethoxynaphthalen-1-yl)-2*H*-quinolizin-2-one

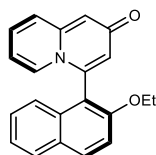

Following the general procedure **H**, **2b** was afforded as yellow solid (27.9 mg, 88% yield), m.p. 97-98 °C.  $[\alpha]_{\text{D}}^{25} +110.0$  ( $c = 0.5$ ,  $\text{CHCl}_3$ ).  $^1\text{H NMR}$  (500 MHz, Chloroform-*d*)  $\delta$ : 8.08 (d,  $J = 9.1$  Hz, 1H), 7.91 (dd,  $J = 6.5, 3.0$  Hz, 1H), 7.45 – 7.40 (m, 1H), 7.43 (d,  $J = 4.0$  Hz, 1H), 7.40 (s, 1H), 7.37 (dd,  $J = 8.8, 5.4$  Hz, 2H), 7.34 – 7.30 (m, 1H), 7.13 (dd,  $J = 9.0, 6.4$  Hz, 1H), 6.89 (s, 1H), 6.82 (s, 1H), 6.40 (t,  $J = 6.9$  Hz, 1H), 4.19 (qd,  $J = 7.0, 2.1$  Hz, 2H), 1.23 (t,  $J = 7.0$  Hz, 3H).  $^{13}\text{C NMR}$  (126 MHz, Chloroform-*d*)  $\delta$ : 174.85, 153.15, 144.02, 140.28, 131.44, 131.40, 128.43, 127.85, 127.48, 127.33, 127.00, 125.31, 123.46, 123.38, 122.37, 113.77, 112.85, 110.80, 110.38, 63.80, 13.76. **HRMS(ESI) m/z**: calculated for  $[\text{C}_{21}\text{H}_{17}\text{NO}_2 + \text{H}]^+$  316.1138, found 316.1128. **HPLC data** (Chiralpak OD column, hexane : isopropanol = 70 : 30, 1.0 mL/min):  $t_{\text{r}} = 8.1$  min (major),  $t_{\text{r}} = 15.6$  min (minor), ee = 92%.

**2c**, 4-(6-bromo-2-ethoxynaphthalen-1-yl)-2*H*-quinolizin-2-one

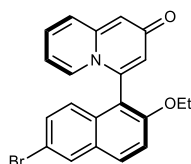

Following the general procedure **H**, **2c** was afforded as yellow solid (30.9 mg, 79 % yield), m.p. 52-53 °C.  $[\alpha]_{\text{D}}^{25} -255.2$  ( $c = 0.5$ ,  $\text{CHCl}_3$ ).  $^1\text{H NMR}$  (500 MHz, Chloroform-*d*)  $\delta$ : 8.08 (d,  $J = 2.0$

Hz, 1H), 8.00 (d,  $J = 9.1$  Hz, 1H), 7.51 (dd,  $J = 9.0, 2.0$  Hz, 1H), 7.44 (d,  $J = 9.3$  Hz, 1H), 7.31 (s, 1H), 7.31 – 7.27 (m, 2H), 7.13 (dd,  $J = 9.1, 6.4$  Hz, 1H), 6.82 (d,  $J = 15.8$  Hz, 2H), 6.40 (t,  $J = 6.7$  Hz, 1H), 4.20 (tt,  $J = 7.1, 3.5$  Hz, 2H), 1.24 (t,  $J = 7.0$  Hz, 3H).  **$^{13}\text{C}$  NMR (126 MHz, Chloroform-*d*)**  $\delta$ : 175.62, 154.51, 145.19, 140.89, 132.57, 131.62, 131.36, 131.05, 130.33, 129.96, 129.55, 129.32, 128.74, 125.21, 124.63, 123.38, 118.29, 114.94, 112.29, 65.01, 14.74. **HRMS(ESI)  $m/z$** : calculated for  $[\text{C}_{21}\text{H}_{16}\text{BrNO}_2 + \text{H}]^+$  394.0443, found 394.0442. **HPLC data** (Chiralpak OD column, hexane : isopropanol = 70 : 30, 1.0 mL/min):  $t_r = 7.9$  min (major),  $t_r = 11.7$  min (minor), ee = 90%.

**2d**, 4-(7-bromo-2-ethoxynaphthalen-1-yl)-2*H*-quinolizin-2-one

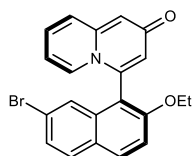

Following the general procedure **H**, **2d** was afforded as yellow solid (37.3 mg, 95 % yield), m.p. 66-67 °C.  $[\alpha]_{\text{D}}^{25} -148.4$  ( $c = 0.25$ ,  $\text{CHCl}_3$ ).  **$^1\text{H}$  NMR (500 MHz, Chloroform-*d*)**  $\delta$ : 8.03 (d,  $J = 9.0$  Hz, 1H), 7.75 (d,  $J = 8.6$  Hz, 1H), 7.52 (s, 1H), 7.47 (d,  $J = 8.6$  Hz, 1H), 7.40 (d,  $J = 9.0$  Hz, 1H), 7.32 – 7.25 (m, 2H), 7.12 (s, 1H), 6.83 (s, 2H), 6.42 (t,  $J = 6.7$  Hz, 1H), 4.16 (q,  $J = 7.2$  Hz, 2H), 1.18 (t,  $J = 6.9$  Hz, 3H).  **$^{13}\text{C}$  NMR (126 MHz, Chloroform-*d*)**  $\delta$ : 174.32, 153.97, 144.17, 139.97, 132.68, 131.61, 131.37, 129.03, 128.24, 127.83, 127.00, 126.26, 126.02, 124.32, 123.72, 121.83, 112.99, 112.89, 111.47, 63.90, 13.68. **HRMS(ESI)  $m/z$** : calculated for  $[\text{C}_{21}\text{H}_{16}\text{BrNO}_2 + \text{H}]^+$  394.0443, found 394.0440. **HPLC data** (Chiralpak OD column, hexane : isopropanol = 70 : 30, 1.0 mL/min):  $t_r = 6.9$  min (major),  $t_r = 10.7$  min (minor), ee = 91%.

**2e**, 4-(2-ethoxy-7-phenylnaphthalen-1-yl)-2*H*-quinolizin-2-one

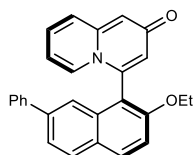

Following the general procedure **H**, **2e** was afforded as yellow solid (29.5 mg, 75 % yield), m.p. 66-67 °C.  $[\alpha]_{\text{D}}^{25} -482.5$  ( $c = 0.25$ ,  $\text{CHCl}_3$ ).  **$^1\text{H}$  NMR (500 MHz, Chloroform-*d*)**  $\delta$ : 8.11 (d,  $J = 9.1$  Hz, 1H), 7.99 (d,  $J = 8.5$  Hz, 1H), 7.70 (dd,  $J = 8.5, 1.6$  Hz, 1H), 7.56 (d,  $J = 7.7$  Hz, 3H), 7.43 (q,  $J = 9.2, 8.3$  Hz, 3H), 7.38 (t,  $J = 7.3$  Hz, 2H), 7.34 – 7.29 (m, 1H), 7.12 (dd,  $J = 9.0, 6.4$  Hz, 1H), 6.97 (s, 1H), 6.82 (s, 1H), 6.39 (t,  $J = 6.9$  Hz, 1H), 4.23 – 4.19 (m, 2H), 1.24 (t,  $J = 7.0$  Hz, 3H).



**<sup>13</sup>C NMR (126 MHz, Chloroform-*d*)**  $\delta$ : 175.88, 154.70, 145.29, 141.76, 141.08, 141.05, 140.56, 132.84, 132.37, 129.51, 129.04, 128.88, 128.79, 128.14, 127.77, 127.53, 124.65, 124.47, 124.45, 121.06, 115.04, 113.83, 112.31, 64.92, 14.80. **HRMS(ESI) m/z**: calculated for [C<sub>27</sub>H<sub>21</sub>NO<sub>2</sub> + H]<sup>+</sup> 392.1651, found 392.1644. **HPLC data** (Chiralpak OD column, hexane : isopropanol = 70 : 30, 1.0 mL/min): tr = 8.4 min (major), tr = 10.2 min (minor), ee = 84%.

**2f**, 4-(2-ethoxy-7-(phenylethynyl)naphthalen-1-yl)-2*H*-quinolizin-2-one

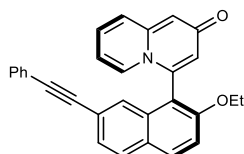

Following the general procedure **H**, **2f** was afforded as yellow solid (33.1 mg, 80 % yield), m.p. 70-71 °C. [ $\alpha$ ]<sub>D</sub><sup>25</sup> -562.3 (*c* = 0.5, CHCl<sub>3</sub>). **<sup>1</sup>H NMR (500 MHz, Chloroform-*d*)**  $\delta$ : 8.05 (d, *J* = 9.0 Hz, 1H), 7.87 (d, *J* = 8.4 Hz, 1H), 7.60 (s, 1H), 7.59 – 7.52 (m, 3H), 7.39 (d, *J* = 9.1 Hz, 1H), 7.35 – 7.31 (m, 4H), 7.29 (d, *J* = 9.4 Hz, 1H), 7.11 (t, *J* = 7.8 Hz, 1H), 6.87 (d, *J* = 7.3 Hz, 2H), 6.40 (t, *J* = 6.9 Hz, 1H), 4.17 (q, *J* = 7.0 Hz, 2H), 1.21 (t, *J* = 6.9 Hz, 3H). **<sup>13</sup>C NMR (126 MHz, Chloroform-*d*)**  $\delta$ : 175.63, 154.76, 145.23, 141.17, 132.42, 132.25, 131.89, 131.67, 129.43, 129.01, 128.86, 128.57, 128.54, 128.44, 128.33, 128.18, 127.12, 126.50, 124.54, 122.94, 122.74, 114.38, 114.32, 112.36, 91.09, 89.40, 64.85, 14.71. **HRMS(ESI) m/z**: calculated for [C<sub>29</sub>H<sub>21</sub>NO<sub>2</sub> + H]<sup>+</sup> 416.1651, found 416.1648. **HPLC data** (Chiralpak AD column, hexane : isopropanol = 65:35, 1.0 mL/min): tr = 9.2 min (major), tr = 12.4 min (minor), ee = 95%.

**2g**, 4-(2-((4-methoxybenzyl)oxy)naphthalen-1-yl)-2*H*-quinolizin-2-one

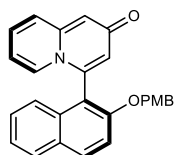

Following the general procedure **H**, **2g** was afforded as yellow solid (32.0 mg, 78 % yield), m.p. 63-64 °C. [ $\alpha$ ]<sub>D</sub><sup>25</sup> -183.5 (*c* = 0.5, CHCl<sub>3</sub>). **<sup>1</sup>H NMR (500 MHz, Chloroform-*d*)**  $\delta$ : 8.06 (d, *J* = 9.1 Hz, 1H), 7.91 (dd, *J* = 6.2, 3.3 Hz, 1H), 7.48 – 7.43 (m, 3H), 7.38 – 7.36 (m, 1H), 7.32 – 7.29 (m, 2H), 7.11 (d, *J* = 8.3 Hz, 3H), 6.86 (s, 2H), 6.82 (d, *J* = 8.1 Hz, 2H), 6.35 (t, *J* = 6.9 Hz, 1H), 5.16 (s, 2H), 3.80 (s, 3H). **<sup>13</sup>C NMR (126 MHz, Chloroform-*d*)**  $\delta$ : 175.80, 159.46, 153.98, 145.13, 141.35, 132.44, 132.44, 129.50, 129.15, 128.67, 128.56, 128.41, 128.17, 126.26, 124.78, 124.48, 123.48, 115.60, 114.80, 114.01, 112.05, 111.59, 111.49, 70.92, 55.26. **HRMS(ESI) m/z**:

calculated for  $[C_{27}H_{21}NO_3 + H]^+$  408.1600, found 408.1590. **HPLC data** (Chiralpak OD column, hexane : isopropanol = 70 : 30, 1.0 mL/min):  $t_r = 13.4$  min (major),  $t_r = 23.1$  min (minor), ee = 91%.

**2h**, 4-(2-(dimethylamino)naphthalen-1-yl)-2*H*-quinolizin-2-one

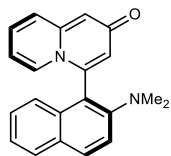

Following the general procedure **H**, **2h** was afforded as yellow solid (28.0 mg, 89 % yield), m.p. 204-205 °C.  $[\alpha]_D^{25} +48.0$  ( $c = 1.0$ ,  $CHCl_3$ ).  **$^1H$  NMR (500 MHz, Chloroform-*d*)**  $\delta$ : 8.02 (d,  $J = 9.0$  Hz, 1H), 7.88 (dd,  $J = 7.3, 2.0$  Hz, 1H), 7.48 (d,  $J = 9.0$  Hz, 1H), 7.42 (ddd,  $J = 8.0, 6.1, 1.5$  Hz, 2H), 7.38 (d,  $J = 7.6$  Hz, 1H), 7.33 – 7.31 (m, 2H), 7.15 (dd,  $J = 9.1, 6.5$  Hz, 1H), 6.98 (s, 1H), 6.84 (s, 1H), 6.43 – 6.40 (m, 1H), 2.70 (s, 6H).  **$^{13}C$  NMR (126 MHz, Chloroform-*d*)**  $\delta$ : 167.66, 150.92, 149.50, 145.37, 132.93, 132.50, 132.07, 131.07, 130.18, 130.00, 129.71, 128.80, 128.23, 127.03, 125.91, 125.04, 124.66, 122.29, 119.45, 116.76, 43.66. **HRMS(ESI) m/z**: calculated for  $[C_{21}H_{18}N_2O + H]^+$  315.1497, found 315.1488. **HPLC data** (Chiralpak OD column, hexane : isopropanol = 70 : 30, 1.0 mL/min):  $t_r = 7.7$  min (major),  $t_r = 10.9$  min (minor), ee = 92%.

**2i**, 4-(2-(dibenzylamino)naphthalen-1-yl)-2*H*-quinolizin-2-one

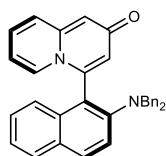

Following the general procedure **H**, **2i** was afforded as yellow solid (38.6 mg, 83 % yield), m.p. 75-76 °C.  $[\alpha]_D^{25} -131.4$  ( $c = 0.5$ ,  $CHCl_3$ ).  **$^1H$  NMR (500 MHz, Chloroform-*d*)**  $\delta$ : 8.03 (d,  $J = 8.9$  Hz, 1H), 7.93 (d,  $J = 8.1$  Hz, 1H), 7.51 (dd,  $J = 8.0, 6.2$  Hz, 2H), 7.44 (td,  $J = 7.5, 6.7, 1.3$  Hz, 1H), 7.37 (d,  $J = 8.5$  Hz, 1H), 7.32 (t,  $J = 4.6$  Hz, 1H), 7.22 – 7.21 (m, 6H), 7.06 (dd,  $J = 9.1, 6.4$  Hz, 1H), 7.01 (d,  $J = 7.4$  Hz, 1H), 6.96 (dd,  $J = 6.5, 2.9$  Hz, 4H), 6.89 (d,  $J = 2.7$  Hz, 1H), 6.82 (d,  $J = 2.7$  Hz, 1H), 6.15 – 6.12 (m, 1H), 4.11 (s, 4H).  **$^{13}C$  NMR (126 MHz, Chloroform-*d*)**  $\delta$ : 174.35, 147.66, 143.99, 141.83, 136.14, 131.39, 130.29, 129.89, 128.23, 127.66, 127.45, 127.30, 127.28, 126.83, 126.32, 125.85, 124.80, 123.42, 123.05, 121.91, 111.16, 110.58, 56.37. **HRMS(ESI) m/z**: calculated for  $[C_{33}H_{26}N_2O + H]^+$  467.2123, found 467.2116. **HPLC data** (Chiralpak AD column,

hexane : isopropanol = 70 : 30, 1.0 mL/min):  $t_r$  = 10.5 min (major),  $t_r$  = 17.1 min (minor), ee = 98%.

**2j**, 4-(2-methylnaphthalen-1-yl)-2*H*-quinolizin-2-one

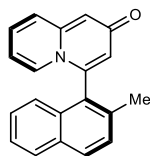

Following the general procedure **H**, **2j** was afforded as yellow solid (22.1 mg, 77 % yield), m.p. 45-46 °C.  $[\alpha]_D^{25}$  -133.2 ( $c$  = 0.3, CHCl<sub>3</sub>). **<sup>1</sup>H NMR (500 MHz, Chloroform-*d*)**  $\delta$ : 8.01 (d,  $J$  = 8.4 Hz, 1H), 7.95 (d,  $J$  = 8.2 Hz, 1H), 7.54 (dt,  $J$  = 7.7, 3.3 Hz, 2H), 7.45 (t,  $J$  = 7.8 Hz, 1H), 7.34 (d,  $J$  = 9.2 Hz, 1H), 7.29 (d,  $J$  = 8.4 Hz, 1H), 7.18 – 7.09 (m, 2H), 6.90 – 6.89 (m, 2H), 6.39 (t,  $J$  = 6.9 Hz, 1H), 2.29 (s, 3H). **<sup>13</sup>C NMR (126 MHz, Chloroform-*d*)**  $\delta$ : 175.75, 145.04, 143.39, 135.59, 132.16, 131.47, 130.47, 128.86, 128.64, 128.61, 128.43, 127.80, 127.76, 126.13, 125.67, 124.80, 124.04, 112.59, 111.81, 19.89. **HRMS(ESI)  $m/z$** : calculated for [C<sub>20</sub>H<sub>15</sub>NO + H]<sup>+</sup> 286.1232, found 286.1227. **HPLC data** (Chiralpak IG column, hexane : isopropanol = 50 : 50, 1.0 mL/min):  $t_r$  = 21.3 min (major),  $t_r$  = 15.1 min (minor), ee = 85%.

**2k**, 4-(2-ethylnaphthalen-1-yl)-2*H*-quinolizin-2-one

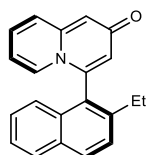

Following the general procedure **H**, **2k** was afforded as yellow solid (28.1 mg, 94 % yield), m.p. 66-67 °C.  $[\alpha]_D^{25}$  +210.4 ( $c$  = 0.5, CHCl<sub>3</sub>). **<sup>1</sup>H NMR (500 MHz, Chloroform-*d*)**  $\delta$ : 8.04 (d,  $J$  = 8.5 Hz, 1H), 7.95 (d,  $J$  = 8.2 Hz, 1H), 7.58 (d,  $J$  = 8.5 Hz, 1H), 7.53 (t,  $J$  = 7.5 Hz, 1H), 7.44 (t,  $J$  = 7.7 Hz, 1H), 7.27 (t,  $J$  = 9.7 Hz, 2H), 7.14 (d,  $J$  = 7.4 Hz, 1H), 7.08 (t,  $J$  = 7.9 Hz, 1H), 6.90 (s, 1H), 6.81 (s, 1H), 6.34 – 6.31 (m, 1H), 2.66 – 2.54 (m, 1H), 2.52 – 2.47 (m, 1H), 1.20 (t,  $J$  = 7.6 Hz, 3H). **<sup>13</sup>C NMR (126 MHz, Chloroform-*d*)**  $\delta$ : 174.68, 143.91, 142.03, 140.49, 139.05, 131.11, 130.32, 129.75, 128.13, 127.48, 127.37, 126.70, 126.10, 126.07, 125.16, 123.70, 123.22, 111.25, 110.93, 25.81, 14.37. **HRMS(ESI)  $m/z$** : calculated for [C<sub>21</sub>H<sub>17</sub>NO + H]<sup>+</sup> 300.1388, found 300.1386. **HPLC data** (Chiralpak IG column, hexane : isopropanol = 50 : 50, 1.0 mL/min):  $t_r$  = 16.3 min (major),  $t_r$  = 24.9 min (minor), ee = 88%.

**2l**, 4-(2-butylnaphthalen-1-yl)-2*H*-quinolizin-2-one

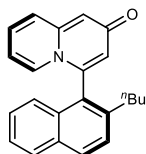

Following the general procedure **H**, **2l** was afforded as yellow solid (26.8 mg, 82 % yield), m.p. 34-35 °C.  $[\alpha]_D^{25}$  -116.8 ( $c = 0.5$ ,  $\text{CHCl}_3$ ). **<sup>1</sup>H NMR (500 MHz, Chloroform-*d*)**  $\delta$ : 8.01 (d,  $J = 8.5$  Hz, 1H), 7.92 (d,  $J = 8.1$  Hz, 1H), 7.55 (d,  $J = 8.5$  Hz, 1H), 7.50 (t,  $J = 7.5$  Hz, 1H), 7.41 (t,  $J = 7.7$  Hz, 1H), 7.28 (d,  $J = 9.0$  Hz, 1H), 7.24 (d,  $J = 8.4$  Hz, 1H), 7.11 (d,  $J = 7.4$  Hz, 1H), 7.09 – 7.07 (m, 1H), 6.88 – 6.87 (m, 1H), 6.78 (s, 1H), 6.31 (t,  $J = 6.9$  Hz, 1H), 2.64 – 2.58 (m, 1H), 2.45 – 2.39 (m, 1H), 1.61 – 1.49 (m, 2H), 1.29 – 1.23 (m, 2H), 0.82 (t,  $J = 7.3$  Hz, 3H). **<sup>13</sup>C NMR (126 MHz, Chloroform-*d*)**  $\delta$ : 174.66, 143.89, 142.07, 139.29, 131.08, 131.00, 130.35, 129.56, 129.52, 128.15, 127.52, 127.36, 126.66, 126.57, 126.32, 125.14, 123.64, 123.20, 111.23, 32.36, 32.02, 21.58, 12.76. **HRMS(ESI) m/z**: calculated for  $[\text{C}_{23}\text{H}_{21}\text{NO} + \text{H}]^+$  328.1701, found 328.1698. **HPLC data** (Chiralpak OD column, hexane : isopropanol = 70 : 30, 1.0 mL/min):  $t_r = 21.1$  min (major),  $t_r = 36.9$  min (minor), ee = 91%.

**2m**, 4-(2-isopropyl-naphthalen-1-yl)-2H-quinolizin-2-one

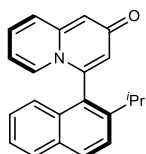

Following the general procedure **H**, **2m** was afforded as yellow solid (29.8 mg, 95 % yield), m.p. 120-121 °C.  $[\alpha]_D^{25}$  -128.0 ( $c = 0.3$ ,  $\text{CHCl}_3$ ). **<sup>1</sup>H NMR (500 MHz, Chloroform-*d*)**  $\delta$ : 8.06 (dd,  $J = 16.9$ , 8.6 Hz, 1H), 7.94 (d,  $J = 8.1$  Hz, 1H), 7.61 (dd,  $J = 10.2$ , 8.6 Hz, 1H), 7.53 (t,  $J = 7.5$  Hz, 1H), 7.43 (t,  $J = 7.6$  Hz, 1H), 7.31 (s, 1H), 7.24 (d,  $J = 8.6$  Hz, 1H), 7.16 (dd,  $J = 14.7$ , 7.4 Hz, 1H), 7.10 (dd,  $J = 9.1$ , 6.5 Hz, 1H), 6.90 – 6.89 (m, 1H), 6.82 (s, 1H), 6.34 (t,  $J = 7.0$  Hz, 1H), 2.79 (p,  $J = 6.8$  Hz, 1H), 1.27 (d,  $J = 6.8$  Hz, 3H), 1.20 (d,  $J = 6.8$  Hz, 3H). **<sup>13</sup>C NMR (126 MHz, Chloroform-*d*)**  $\delta$ : 174.61, 144.81, 143.93, 142.17, 140.49, 131.16, 130.15, 130.07, 129.77, 128.20, 127.56, 127.32, 126.70, 125.24, 123.75, 123.47, 123.21, 122.93, 111.25, 30.35, 23.12, 22.36. **HRMS(ESI) m/z**: calculated for  $[\text{C}_{22}\text{H}_{19}\text{NO} + \text{H}]^+$  314.1545, found 314.1541. **HPLC data** (Chiralpak IA column, hexane : isopropanol = 70: 30, 1.0 mL/min):  $t_r = 38.1$  min (major),  $t_r = 21.1$  min (minor), ee = 93%.

**2n**, 4-(2-phenylnaphthalen-1-yl)-2H-quinolizin-2-one

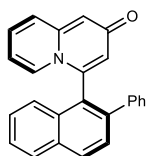

Following the general procedure **H**, **2n** was afforded as yellow solid (32.4 mg, 93 % yield), m.p. 51-52 °C.  $[\alpha]_{\text{D}}^{25} +288.5$  ( $c = 0.5$ ,  $\text{CHCl}_3$ ).  **$^1\text{H}$  NMR (500 MHz, Chloroform-*d*)**  $\delta$ : 8.17 (d,  $J = 8.5$  Hz, 1H), 8.04 (d,  $J = 8.2$  Hz, 1H), 7.68 (d,  $J = 8.5$  Hz, 1H), 7.62 (t,  $J = 7.5$  Hz, 1H), 7.52 (t,  $J = 7.6$  Hz, 1H), 7.41 (t,  $J = 8.1$  Hz, 2H), 7.29 (d,  $J = 8.7$  Hz, 1H), 7.24 – 7.23 (m, 3H), 7.16 (t,  $J = 7.7$  Hz, 3H), 6.98 (s, 1H), 6.89 (s, 1H), 6.46 (d,  $J = 7.2$  Hz, 1H).  **$^{13}\text{C}$  NMR (126 MHz, Chloroform-*d*)**  $\delta$ : 172.97, 143.67, 142.36, 139.52, 138.56, 131.81, 130.16, 130.01, 128.46, 128.34, 128.05, 127.61, 127.39, 127.27, 127.16, 126.94, 126.00, 125.90, 125.49, 123.86, 123.56, 112.32, 110.52. **HRMS(ESI)  $m/z$** : calculated for  $[\text{C}_{25}\text{H}_{17}\text{NO}_2 + \text{H}]^+$  348.1388, found 348.1386. **HPLC data** (Chiralpak OD column, hexane : isopropanol = 70 : 30, 1.0 mL/min):  $t_{\text{r}} = 6.9$  min (major),  $t_{\text{r}} = 10.3$  min (minor), ee = 93%.

**2o**, 4-([1,2'-binaphthalen]-1'-yl)-2H-quinolizin-2-one

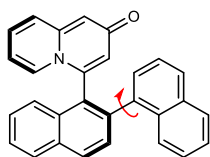

Following the general procedure **H**, **2o** was afforded as yellow solid (35.0 mg, 89 % yield), m.p. 80-81 °C.  $[\alpha]_{\text{D}}^{25} -76.0$  ( $c = 0.5$ ,  $\text{CHCl}_3$ ). PS: There are conformers existed around the red arrow. The rotation barrier is 18.9 kcal/mol by calculation at the M062X/6-311+G(d,p),SMD(Toluene)//M062X/6-31g(d) level.  **$^1\text{H}$  NMR (500 MHz, Chloroform-*d*)**  $\delta$ : 8.19 (dd,  $J = 12.1, 8.4$  Hz, 2H), 8.10 (d,  $J = 8.2$  Hz, 2H), 7.85 (d,  $J = 8.1$  Hz, 1H), 7.82 (d,  $J = 8.2$  Hz, 1H), 7.77 (d,  $J = 8.3$  Hz, 2H), 7.74 (t,  $J = 9.0$  Hz, 1H), 7.70 – 7.64 (m, 4H), 7.60 (d,  $J = 8.5$  Hz, 1H), 7.51 – 7.45 (m, 4H), 7.45 – 7.37 (m, 4H), 7.37 – 7.32 (m, 4H), 7.21 (t,  $J = 7.7$  Hz, 2H), 7.16 (d,  $J = 9.2$  Hz, 2H), 7.09 (dd,  $J = 9.2, 6.4$  Hz, 2H), 7.06 – 6.95 (m, 1H), 6.91 (s, 1H), 6.56 (d,  $J = 2.7$  Hz, 1H), 6.50 (dd,  $J = 7.5, 2.7$  Hz, 2H), 6.47 (d,  $J = 6.3$  Hz, 2H), 5.95 (s, 1H).  **$^{13}\text{C}$  NMR (126 MHz, Chloroform-*d*)**  $\delta$ : 174.20, 173.76, 143.43, 143.32, 141.97, 141.12, 138.38, 137.81, 136.37, 134.91, 132.57, 132.53, 132.03, 131.91, 130.81, 130.73, 130.27, 130.20, 129.03, 129.01, 128.54, 128.30, 128.27, 127.93, 127.89, 127.70, 127.59, 127.57, 127.37, 127.33, 127.24, 127.18, 127.09, 127.04, 126.15, 126.10, 125.80, 125.32, 124.82, 124.66, 124.22, 124.10, 124.07, 123.98, 123.67, 123.41, 123.25, 123.12,

111.12, 110.70, 110.50, 110.45. **HRMS(ESI) m/z**: calculated for  $[C_{29}H_{19}NO + H]^+$  398.1545, found 398.1544. **HPLC data** (Chiralpak IA column, hexane : isopropanol = 80: 20, 1.0 mL/min):  $tr = 31.3$  min (major),  $tr = 45.5$  min (minor),  $ee = 99\%$ .

**2p**, 4-(2-bromonaphthalen-1-yl)-2*H*-quinolizin-2-one

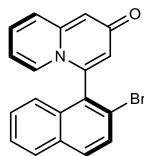

Following the general procedure **H**, **2p** was afforded as yellow solid (29.1 mg, 83 % yield), m.p. 62-63 °C.  $[\alpha]_D^{25} -130.6$  ( $c = 0.3$ ,  $CHCl_3$ ).  **$^1H$  NMR (500 MHz, Chloroform-*d*)**  $\delta$ : 7.98 (dd,  $J = 8.5$ , 5.1 Hz, 2H), 7.82 (d,  $J = 8.8$  Hz, 1H), 7.62 (t,  $J = 7.6$  Hz, 1H), 7.51 (t,  $J = 7.7$  Hz, 1H), 7.42 (d,  $J = 8.5$  Hz, 1H), 7.31 (s, 1H), 7.14 – 7.09 (m, 2H), 6.87 (s, 1H), 6.82 (s, 1H), 6.40 (t,  $J = 6.9$  Hz, 1H).  **$^{13}C$  NMR (126 MHz, Chloroform-*d*)**  $\delta$ : 174.59, 143.87, 141.60, 131.66, 131.39, 130.96, 129.04, 128.86, 128.46, 127.69, 127.64, 127.62, 127.56, 126.32, 123.80, 123.57, 122.02, 111.58, 111.22. **HRMS(ESI) m/z**: calculated for  $[C_{19}H_{12}BrNO + H]^+$  350.0181, found 350.0171. **HPLC data** (Chiralpak AD column, hexane : isopropanol = 70 : 30, 1.0 mL/min):  $tr = 17.1$  min (minor),  $tr = 22.0$  min (major),  $ee = 66\%$ .

**2q**, 4-(2-chloronaphthalen-1-yl)-2*H*-quinolizin-2-one

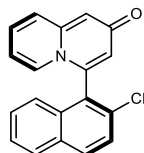

Following the general procedure **H**, **2q** was afforded as yellow solid (22.3 mg, 73 % yield), m.p. 59-60 °C.  $[\alpha]_D^{25} -42.3$  ( $c = 0.5$ ,  $CHCl_3$ ).  **$^1H$  NMR (500 MHz, Chloroform-*d*)**  $\delta$ : 8.01 (dd,  $J = 10.6$ , 8.3 Hz, 2H), 7.85 – 7.54 (m, 2H), 7.48 (s, 1H), 7.33 (d,  $J = 7.8$  Hz, 1H), 7.16 – 7.15 (m, 3H), 6.92 (s, 2H), 6.44 (s, 1H).  **$^{13}C$  NMR (126 MHz, Chloroform-*d*)**  $\delta$ : 175.36, 145.03, 141.15, 139.23, 132.71, 132.30, 132.13, 128.81, 128.76, 128.67, 128.64, 127.57, 127.23, 127.08, 126.07, 124.86, 124.33, 112.92, 112.13. **HRMS(ESI) m/z**: calculated for  $[C_{19}H_{12}ClNO + H]^+$  306.0686, found 306.0682. **HPLC data** (Chiralpak AD column, hexane : isopropanol = 70 : 30, 1.0 mL/min):  $tr = 18.0$  min (minor),  $tr = 23.0$  min (major),  $ee = 63\%$ .

**2r**, 9-bromo-4-(2-ethoxynaphthalen-1-yl)-2*H*-quinolizin-2-one

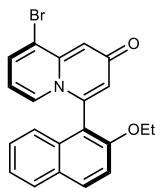

Following the general procedure **H**, **2r** was afforded as yellow solid (27.8 mg, 70 % yield), m.p. 58-59 °C.  $[\alpha]_D^{25}$  -222.4 ( $c = 0.5$ ,  $\text{CHCl}_3$ ). **<sup>1</sup>H NMR (500 MHz, Chloroform-*d*)**  $\delta$ : 8.09 (d,  $J = 8.8$  Hz, 1H), 7.91 (d,  $J = 6.8$  Hz, 1H), 7.79 (t,  $J = 9.8$  Hz, 1H), 7.53 (s, 1H), 7.44 – 7.41 (m, 3H), 7.30 (d,  $J = 9.9$  Hz, 2H), 6.96 (s, 1H), 6.35 (s, 1H), 4.19 – 4.16 (m, 2H), 1.21 (s, 3H). **<sup>13</sup>C NMR (126 MHz, Chloroform-*d*)**  $\delta$ : 176.51, 154.21, 143.39, 142.76, 132.80, 132.60, 132.58, 132.32, 129.53, 128.92, 128.47, 128.28, 124.63, 123.20, 117.63, 114.65, 113.84, 111.06, 111.04, 64.93, 14.82. **HRMS(ESI) m/z**: calculated for  $[\text{C}_{21}\text{H}_{16}\text{BrNO}_2 + \text{H}]^+$  394.0443, found 394.0440. **HPLC data** (Chiralpak OD column, hexane : isopropanol = 70 : 30, 1.0 mL/min):  $t_r = 9.5$  min (major),  $t_r = 16.7$  min (minor), ee = 84%.

**2s**, 8-bromo-4-(2-ethoxynaphthalen-1-yl)-2H-quinolizin-2-one

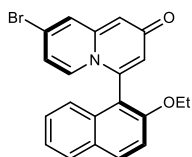

Following the general procedure **H**, **2s** was afforded as yellow solid (34.2 mg, 87 % yield), m.p. 65-66 °C.  $[\alpha]_D^{25}$  -207.4 ( $c = 0.5$ ,  $\text{CHCl}_3$ ). **<sup>1</sup>H NMR (500 MHz, Chloroform-*d*)**  $\delta$ : 8.07 (d,  $J = 9.1$  Hz, 1H), 7.90 – 7.88 (m, 1H), 7.43 (t,  $J = 3.7$  Hz, 3H), 7.40 (d,  $J = 9.2$  Hz, 1H), 7.36 – 7.35 (m, 1H), 7.16 (d,  $J = 7.7$  Hz, 1H), 6.81 (s, 1H), 6.63 (s, 1H), 6.38 (dd,  $J = 7.8, 2.1$  Hz, 1H), 4.20 – 3.17 (m, 2H), 1.25 (t,  $J = 6.9$  Hz, 3H). **<sup>13</sup>C NMR (126 MHz, Chloroform-*d*)**  $\delta$ : 176.06, 154.26, 145.08, 141.70, 132.83, 132.36, 130.41, 128.94, 128.47, 128.30, 125.67, 124.65, 123.52, 123.21, 115.63, 114.25, 114.09, 113.83, 110.98, 64.95, 14.83. **HRMS(ESI) m/z**: calculated for  $[\text{C}_{21}\text{H}_{16}\text{BrNO}_2 + \text{H}]^+$  394.0443, found 394.0439. **HPLC data** (Chiralpak AD column, hexane : isopropanol = 70 : 30, 1.0 mL/min):  $t_r = 33.6$  min (major),  $t_r = 16.5$  min (minor), ee = 88%.

**2t**, 8-chloro-4-(2-ethoxynaphthalen-1-yl)-2H-quinolizin-2-one

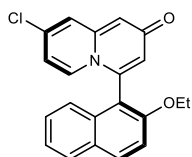

Following the general procedure **H**, **2t** was afforded as yellow solid (34.1 mg, 98 % yield), m.p. 47-48 °C.  $[\alpha]_{\text{D}}^{25}$  -284.3 ( $c = 0.25$ ,  $\text{CHCl}_3$ ).  $^1\text{H NMR}$  (500 MHz, Chloroform-*d*)  $\delta$ : 8.10 (d,  $J = 9.1$  Hz, 1H), 7.93 – 7.91 (m, 1H), 7.47 – 7.45 (m, 2H), 7.42 (d,  $J = 9.1$  Hz, 1H), 7.41 – 7.38 (m, 1H), 7.27 (d,  $J = 7.7$  Hz, 2H), 6.83 (s, 1H), 6.69 (s, 1H), 6.30 (dd,  $J = 7.7, 2.4$  Hz, 1H), 4.21 (qd,  $J = 7.0, 4.6$  Hz, 2H), 1.27 (t,  $J = 6.9$  Hz, 3H).  $^{13}\text{C NMR}$  (126 MHz, Chloroform-*d*)  $\delta$ : 175.01, 153.23, 143.88, 140.53, 134.30, 131.75, 131.37, 129.75, 127.91, 127.41, 127.30, 125.34, 123.66, 122.26, 121.09, 113.35, 112.78, 112.25, 109.98, 63.94, 13.81. HRMS(ESI)  $m/z$ : calculated for  $[\text{C}_{21}\text{H}_{16}\text{ClNO}_2 + \text{H}]^+$  350.0948, found 350.0945. HPLC data (Chiralpak OD column, hexane : isopropanol = 70 : 30, 1.0 mL/min):  $t_r = 9.2$  min (major),  $t_r = 21.8$  min (minor), ee = 95%.

**2u**, 7-bromo-4-(2-ethoxynaphthalen-1-yl)-2*H*-quinolizin-2-one

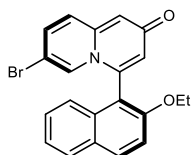

Following the general procedure **H**, **2u** was afforded as yellow solid (21.9 mg, 56 % yield), m.p. 73-74 °C.  $[\alpha]_{\text{D}}^{25}$  -289.8 ( $c = 0.2$ ,  $\text{CHCl}_3$ ).  $^1\text{H NMR}$  (500 MHz, Chloroform-*d*)  $\delta$ : 8.12 (d,  $J = 9.1$  Hz, 1H), 7.94 (dd,  $J = 6.7, 2.7$  Hz, 1H), 7.48 (q,  $J = 3.3$  Hz, 2H), 7.45 – 7.42 (m, 2H), 7.39 – 7.27 (m, 1H), 7.20 (d,  $J = 9.6$  Hz, 1H), 7.12 (dd,  $J = 9.6, 1.7$  Hz, 1H), 6.84 (d,  $J = 2.7$  Hz, 1H), 6.77 (d,  $J = 2.8$  Hz, 1H), 4.28 – 4.20 (m, 2H), 1.28 (t,  $J = 7.0$  Hz, 3H).  $^{13}\text{C NMR}$  (126 MHz, Chloroform-*d*)  $\delta$ : 174.94, 153.14, 142.10, 140.18, 131.85, 131.45, 130.67, 127.99, 127.93, 127.42, 127.27, 125.82, 124.49, 123.67, 122.39, 113.21, 112.70, 111.44, 105.02, 63.85, 13.77. HRMS(ESI)  $m/z$ : calculated for  $[\text{C}_{21}\text{H}_{16}\text{BrNO}_2 + \text{H}]^+$  394.0443, found 394.0439. HPLC data (Chiralpak IG column, hexane : isopropanol = 45: 55, 1.0 mL/min):  $t_r = 37.7$  min (major),  $t_r = 18.3$  min (minor), ee = 94%.

**2v**, 4-(2-ethoxynaphthalen-1-yl)-7-methyl-2*H*-quinolizin-2-one

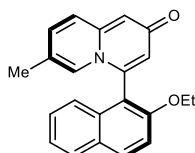

Following the general procedure **H**, **2v** was afforded as yellow solid (31.9 mg, 96 % yield), m.p. 47-48 °C.  $[\alpha]_{\text{D}}^{25}$  -261.0 ( $c = 0.5$ ,  $\text{CHCl}_3$ ).  $^1\text{H NMR}$  (500 MHz, Chloroform-*d*)  $\delta$ : 8.10 (d,  $J = 9.1$  Hz, 1H), 7.93 (dd,  $J = 6.4, 3.3$  Hz, 1H), 7.46 – 7.44 (m, 3H), 7.39 (d,  $J = 5.7$  Hz, 1H), 7.27 (d,  $J =$



9.2 Hz, 1H), 7.13 (s, 1H), 7.01 (d,  $J = 9.1$  Hz, 1H), 6.86 – 6.86 (m, 1H), 6.81 (s, 1H), 4.22 – 4.19 (m, 2H), 2.01 (s, 3H), 1.24 (t,  $J = 7.0$  Hz, 3H).  $^{13}\text{C}$  NMR (126 MHz, Chloroform-*d*)  $\delta$ : 174.36, 153.18, 142.97, 140.04, 131.54, 131.39, 130.85, 127.98, 127.31, 127.03, 125.32, 124.99, 123.54, 123.24, 122.59, 120.65, 114.27, 113.05, 110.28, 63.94, 17.10, 13.79. HRMS(ESI)  $m/z$ : calculated for  $[\text{C}_{22}\text{H}_{19}\text{NO}_2 + \text{H}]^+$  330.1494, found 330.1492. HPLC data (Chiralpak OD column, hexane : isopropanol = 70 : 30, 1.0 mL/min):  $t_r = 7.7$  min (major),  $t_r = 13.1$  min (minor), ee = 94%.

**2w**, 6-(2-ethoxynaphthalen-1-yl)-8*H*-pyrido[1,2-*a*]pyrazin-8-one

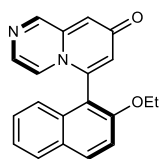

Following the general procedure **H**, **2w** was afforded as white solid (29.0 mg, 92 % yield), m.p. 181-182 °C  $[\alpha]_D^{25} +43.2$  ( $c = 0.5$ ,  $\text{CHCl}_3$ ).  $^1\text{H}$  NMR (500 MHz, Chloroform-*d*)  $\delta$ : 8.74 (s, 1H), 8.09 (d,  $J = 9.1$  Hz, 1H), 7.91 – 7.89 (m, 1H), 7.45 – 7.42 (m, 3H), 7.33 (dd,  $J = 11.6, 5.1$  Hz, 2H), 7.03 (d,  $J = 4.8$  Hz, 1H), 6.93 (d,  $J = 8.9$  Hz, 2H), 4.19 (p,  $J = 6.7$  Hz, 2H), 1.24 (t,  $J = 6.9$  Hz, 3H).  $^{13}\text{C}$  NMR (126 MHz, Chloroform-*d*)  $\delta$ : 175.78, 153.26, 151.31, 140.59, 132.02, 131.26, 127.84, 127.59, 127.49, 127.36, 126.41, 123.67, 122.06, 119.10, 112.92, 112.90, 112.58, 111.93, 63.87, 13.77. HRMS(ESI)  $m/z$ : calculated for  $[\text{C}_{20}\text{H}_{16}\text{N}_2\text{O}_2 + \text{H}]^+$  317.1290, found 317.1282. HPLC data (Chiralpak AD column, hexane : isopropanol = 70 : 30, 1.0 mL/min):  $t_r = 14.4$  min (minor),  $t_r = 15.7$  min (major), ee = 85%.

**2x**, 4-(2-ethoxynaphthalen-1-yl)-7-(4-(((3*aS*,5*aR*,8*aR*,8*bS*)-2,2,7,7-tetramethyltetrahydro-3*aH*-bis([1,3]dioxolo)[4,5-*b*:4',5'-*d*]pyran-3*a*-yl)methoxy)methyl)phenyl)-2*H*-quinolizin-2-one

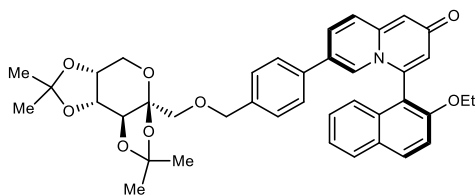

Following the general procedure **H**, **2x** was afforded as yellow solid (51.7 mg, 78 % yield), m.p. 55-56 °C.  $[\alpha]_D^{25} +79.0$  ( $c = 1.3$ ,  $\text{CHCl}_3$ ).  $^1\text{H}$  NMR (500 MHz, Chloroform-*d*)  $\delta$ : 8.11 (d,  $J = 9.1$  Hz, 1H), 7.93 (dd,  $J = 7.5, 2.6$  Hz, 1H), 7.56 (s, 1H), 7.46 (d,  $J = 4.9$  Hz, 6H), 7.32 – 7.31 (m, 3H), 7.15 (d,  $J = 7.9$  Hz, 2H), 6.94 – 6.92 (m, 1H), 4.64 (t,  $J = 11.5$  Hz, 1H), 4.60 – 4.57 (m, 2H), 4.42 (d,  $J = 2.6$  Hz, 1H), 4.26 – 4.20 (m, 3H), 3.93 (dd,  $J = 13.0, 1.8$  Hz, 1H), 3.75 (d,  $J = 13.0$  Hz, 1H),

3.62 – 3.56 (m, 2H), 1.56 (s, 3H), 1.41 (s, 3H), 1.38 (s, 3H), 1.34 (s, 3H), 1.23 (t,  $J = 6.9$  Hz, 3H).  $^{13}\text{C}$  NMR (126 MHz, Chloroform-*d*)  $\delta$ : 154.36, 153.00, 144.36, 138.91, 134.55, 133.25, 132.34, 130.41, 129.02, 128.85, 128.62, 128.45, 128.33, 127.80, 126.48, 126.33, 125.81, 124.71, 123.18, 123.00, 120.55, 113.75, 108.84, 108.54, 102.61, 73.00, 71.73, 70.96, 70.16, 65.01, 61.01, 26.59, 25.80, 25.44, 24.04, 14.83. HRMS(ESI)  $m/z$ : calculated for  $[\text{C}_{40}\text{H}_{41}\text{NO}_8 + \text{H}]^+$  664.2910, found 664.2906.

**2y**, 4-(2-ethoxynaphthalen-1-yl)-7-(4-((((*R*)-2,5,7,8-tetramethyl-2-((4*S*, 8*R*)-4,8,12-trimethyltridec-*yl*)chroman-6-yl)oxy)methyl)phenyl)-2*H*-quinolizin-2-one

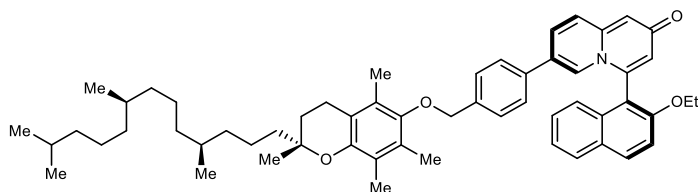

Following the general procedure **H**, **2y** was afforded as yellow solid (74.2 mg, 89 % yield), m.p. 35-36 °C.  $[\alpha]_{\text{D}}^{25} -73$  ( $c = 0.5$ ,  $\text{CHCl}_3$ ).  $^1\text{H}$  NMR (500 MHz, Chloroform-*d*)  $\delta$ : 8.06 (d,  $J = 9.1$  Hz, 1H), 7.89 (d,  $J = 7.4$  Hz, 1H), 7.61 (s, 1H), 7.51 (s, 1H), 7.44 (d,  $J = 6.7$  Hz, 4H), 7.39 (s, 3H), 7.18 (d,  $J = 7.9$  Hz, 2H), 6.89 (s, 1H), 6.83 (s, 1H), 4.63 (s, 2H), 4.19 (q,  $J = 7.0$  Hz, 2H), 2.58 (dd,  $J = 17.3, 10.0$  Hz, 3H), 2.22 (d,  $J = 14.6$  Hz, 3H), 2.16 (s, 3H), 2.12 (s, 3H), 2.09 (s, 3H), 1.79 (dq,  $J = 18.3, 6.5$  Hz, 2H), 1.54 (dq,  $J = 13.4, 7.3, 6.3$  Hz, 3H), 1.39 (d,  $J = 6.6$  Hz, 2H), 1.31 – 1.18 (m, 12H), 1.09 – 1.05 (m, 3H), 0.93 – 0.79 (m, 15H).  $^{13}\text{C}$  NMR (126 MHz, Chloroform-*d*)  $\delta$ : 174.89, 153.25, 147.01, 146.89, 143.01, 140.60, 137.28, 134.40, 131.66, 131.51, 128.04, 128.00, 127.49, 127.41, 127.27, 127.24, 127.20, 126.71, 126.03, 125.59, 125.23, 124.75, 123.80, 123.61, 122.55, 122.00, 116.64, 113.85, 112.82, 73.86, 73.24, 72.88, 63.99, 39.03, 38.37, 36.45, 36.41, 36.29, 31.80, 31.69, 30.28, 26.98, 23.80, 23.44, 22.87, 21.73, 21.63, 20.02, 18.76, 18.67, 13.86, 11.80, 10.93, 10.81. HRMS(ESI)  $m/z$ : calculated for  $[\text{C}_{57}\text{H}_{71}\text{NO}_4 + \text{H}]^+$  834.5641, found 834.5638.

**2z**, 4-(2-ethoxynaphthalen-1-yl)-7-(4-((((1*R*,2*S*,5*R*)-2-isopropyl-5-methyl cyclohexyl)oxy)methyl)phenyl)-2*H*-quinolizin-2-one

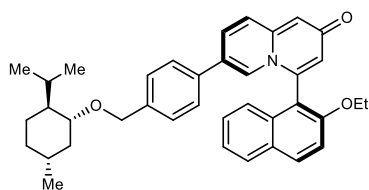

Following the general procedure **H**, **2z** was afforded as yellow solid (41.4 mg, 74 % yield), m.p. 55-56 °C.  $[\alpha]_D^{25}$  -164.6 ( $c = 1.5$ ,  $\text{CHCl}_3$ ).  $^1\text{H NMR}$  (500 MHz, Chloroform-*d*)  $\delta$ : 8.10 (d,  $J = 9.1$  Hz, 1H), 7.93 (dd,  $J = 7.8, 2.1$  Hz, 1H), 7.51 (d,  $J = 1.4$  Hz, 1H), 7.48 (t,  $J = 2.7$  Hz, 2H), 7.43 (d,  $J = 9.2$  Hz, 1H), 7.40 (dd,  $J = 3.6, 1.2$  Hz, 2H), 7.32 (d,  $J = 7.8$  Hz, 3H), 7.16 – 7.15 (m, 2H), 6.91 (d,  $J = 2.7$  Hz, 1H), 6.82 (d,  $J = 2.7$  Hz, 1H), 4.64 (d,  $J = 11.6$  Hz, 1H), 4.37 (d,  $J = 11.6$  Hz, 1H), 4.22 (q,  $J = 7.0$  Hz, 2H), 3.18 (td,  $J = 10.5, 4.1$  Hz, 1H), 2.27 (td,  $J = 7.0, 2.8$  Hz, 1H), 2.18 (ddt,  $J = 12.2, 3.8, 1.9$  Hz, 1H), 1.67 (ddt,  $J = 18.5, 12.9, 3.4$  Hz, 2H), 1.38 (dd,  $J = 6.6, 3.3$  Hz, 2H), 1.30 (d,  $J = 4.2$  Hz, 3H), 1.25 (t,  $J = 7.0$  Hz, 3H), 0.96 (d,  $J = 6.6$  Hz, 3H), 0.91 (d,  $J = 7.1$  Hz, 3H), 0.73 (d,  $J = 6.9$  Hz, 3H).  $^{13}\text{C NMR}$  (126 MHz, Chloroform-*d*)  $\delta$ : 174.87, 153.21, 142.97, 140.54, 138.43, 134.01, 131.62, 131.48, 128.09, 127.97, 127.39, 127.38, 127.16, 125.61, 125.48, 125.09, 124.52, 123.69, 123.58, 122.55, 113.81, 112.78, 110.40, 78.11, 68.81, 63.94, 47.24, 39.26, 33.49, 30.53, 28.70, 24.54, 22.20, 21.34, 19.99, 15.07, 13.84. HRMS(ESI)  $m/z$ : calculated for  $[\text{C}_{38}\text{H}_{41}\text{NO}_3 + \text{H}]^+$  560.3165, found 560.3161.

### Racemization experiments

Compounds **2g**, **2i**, **2k**, **2n** or **2q** (0.1 mmol) was dissolved in chlorobenzene (2.0 mL) in a sealed tube, respectively. The tube was placed in a metal heating plate at 140 °C. At given interval of time, small samples were removed and subjected into HPLC to measure the enantiomeric excess.

The enantiomerisation barrier, corresponding to barrier to rotation for **2g**, **2i**, **2k**, **2n** and **2q** atropisomers, was obtained by kinetic of racemization of an enantiomer.<sup>3</sup> The slope of the first-order kinetic line gives the racemization constant ( $k_{\text{racemization}} = 2 \times k_{\text{enantiomerisation}}$ ). Eyring equation gives the enantiomerisation barrier from enantiomerisation constant ( $k_{\text{enantiomerisation}}$ ),  $R = 8.31451 \text{ J K}^{-1} \text{ mol}^{-1}$ ,  $h = 6.62608 \times 10^{-34} \text{ J s}$  and  $k_B = 1.38066 \times 10^{-23} \text{ J K}^{-1}$ .

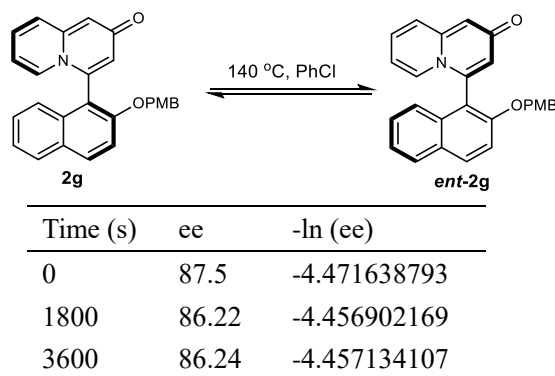

|        |       |              |
|--------|-------|--------------|
| 14400  | 80.86 | -4.392719264 |
| 57600  | 75.1  | -4.318820559 |
| 86400  | 69.66 | -4.243626265 |
| 115200 | 69.98 | -4.248209487 |
| 144000 | 68.34 | -4.224495247 |
| 201600 | 63.96 | -4.158257888 |
| 388800 | 42.26 | -3.743841012 |
| 475200 | 33.44 | -3.509752788 |
| 561600 | 28.56 | -3.352007137 |
| 648000 | 21.66 | -3.075467242 |
| 734400 | 16.04 | -2.775085602 |
| 820800 | 15.8  | -2.76000994  |
| 907200 | 10.56 | -2.357073278 |
| 993600 | 7.06  | -1.954445052 |

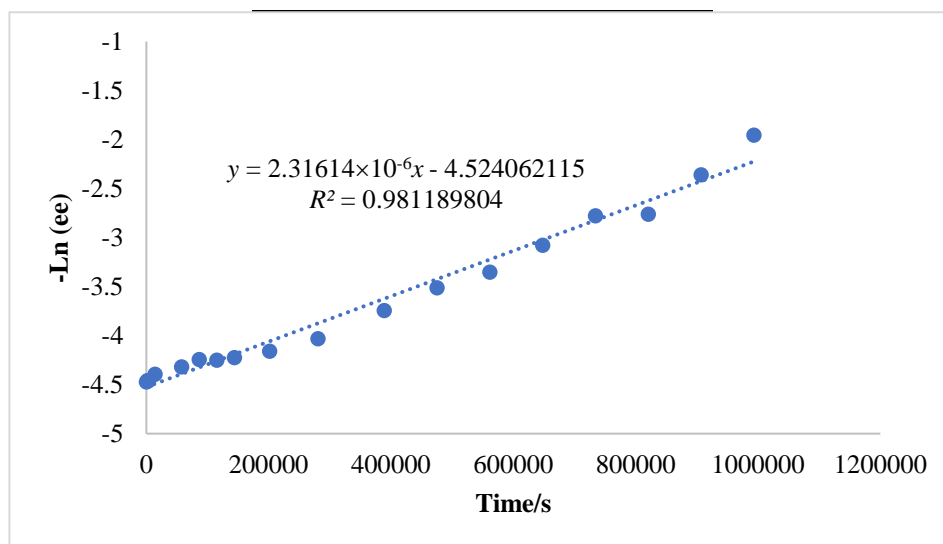

**Supplementary Fig. 2. Racemization experiments of 2g.**

$k_{2g \text{ racemization}} = 2.31614 \times 10^{-6} \text{ s}^{-1}$ ,  $k_{2g \text{ enantiomerisation}} = 1.15807 \times 10^{-6} \text{ s}^{-1}$ ;

$T^{140}_{1/2} = 83.1 \text{ h}$ ;  $\Delta G^\ddagger = 35.08 \text{ kcal mol}^{-1}$ .

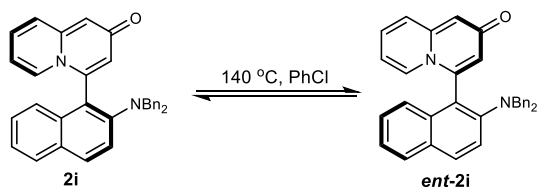

| Time (s) | ee    | -ln (ee)     |
|----------|-------|--------------|
| 0        | 96.76 | -4.572233686 |
| 43200    | 96.06 | -4.564972996 |
| 86400    | 96.0  | -4.564348191 |
| 129600   | 95.3  | -4.557029811 |

|        |       |              |
|--------|-------|--------------|
| 172800 | 94.58 | -4.549446037 |
| 216000 | 93.18 | -4.534533106 |
| 302400 | 92.76 | -4.530015512 |
| 388800 | 91.28 | -4.513931706 |
| 475200 | 89.9  | -4.498697941 |
| 561600 | 89.08 | -4.489534842 |
| 648000 | 87.32 | -4.469579532 |
| 734400 | 87.16 | -4.46774551  |

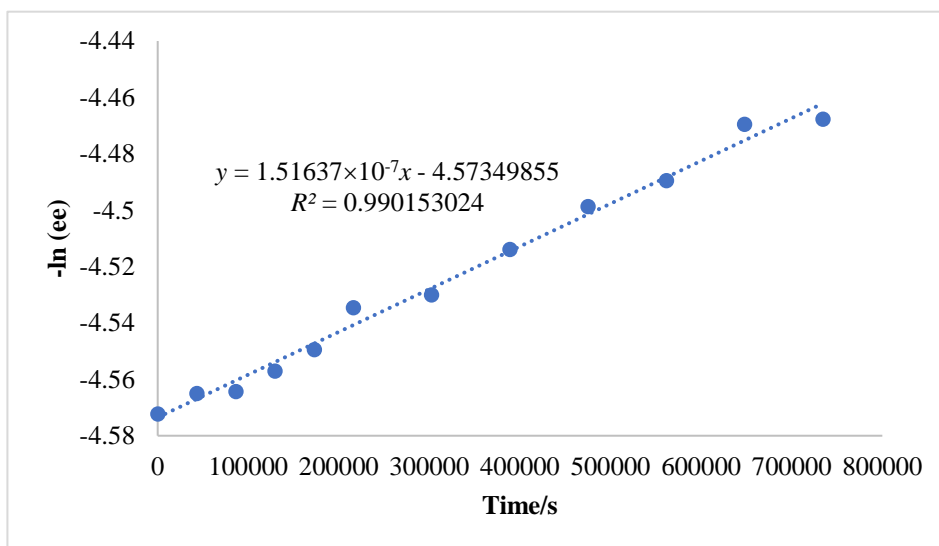

**Supplementary Fig. 3. Racemization experiments of 2i.**

$k_{2i \text{ racemization}} = 1.51637 \times 10^{-7} \text{ s}^{-1}$ ,  $k_{2i \text{ enantiomerisation}} = 7.58185 \times 10^{-8} \text{ s}^{-1}$ ;

$T^{140}_{1/2} = 1269.7 \text{ h}$ ;  $\Delta G^\ddagger = 37.32 \text{ kcal mol}^{-1}$ .

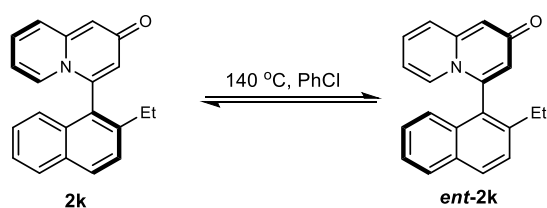

| Time (s) | ee    | $-\ln(\text{ee})$ |
|----------|-------|-------------------|
| 0        | 85.0  | -4.4426513        |
| 86400    | 84.92 | -4.4417096        |
| 172800   | 84.6  | -4.4379343        |
| 216000   | 84.56 | -4.4374613        |
| 302400   | 84.32 | -4.4346191        |
| 388800   | 84.28 | -4.4341446        |
| 475200   | 84.14 | -4.4324821        |

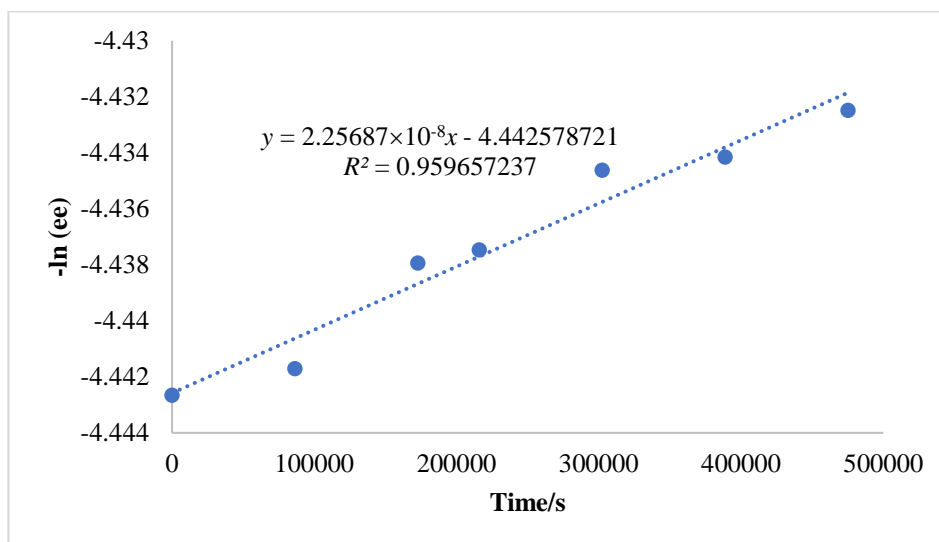

Supplementary Fig. 4. Racemization experiments of 2k.

$k_{2k \text{ racemization}} = 2.25687 \times 10^{-8} \text{ s}^{-1}$ ,  $k_{2k \text{ enantiomerisation}} = 1.28435 \times 10^{-8} \text{ s}^{-1}$ ;

$T^{140}_{1/2} = 8531.3 \text{ h}$ ;  $\Delta G^\ddagger = 38.88 \text{ kcal mol}^{-1}$ .

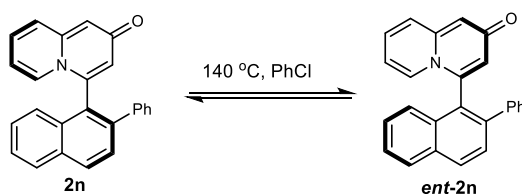

| Time (s) | ee    | $-\ln(\text{ee})$ |
|----------|-------|-------------------|
| 0        | 92.0  | -4.521788577      |
| 86400    | 90.36 | -4.503801692      |
| 129600   | 87.54 | -4.472095832      |
| 172800   | 86.18 | -4.456438132      |
| 216000   | 87.02 | -4.466137977      |
| 302400   | 84.46 | -4.43627805       |
| 388800   | 83.19 | -4.421127148      |
| 475200   | 82.46 | -4.412313327      |
| 568800   | 81.62 | -4.40207433       |
| 648000   | 79.9  | -4.380775853      |

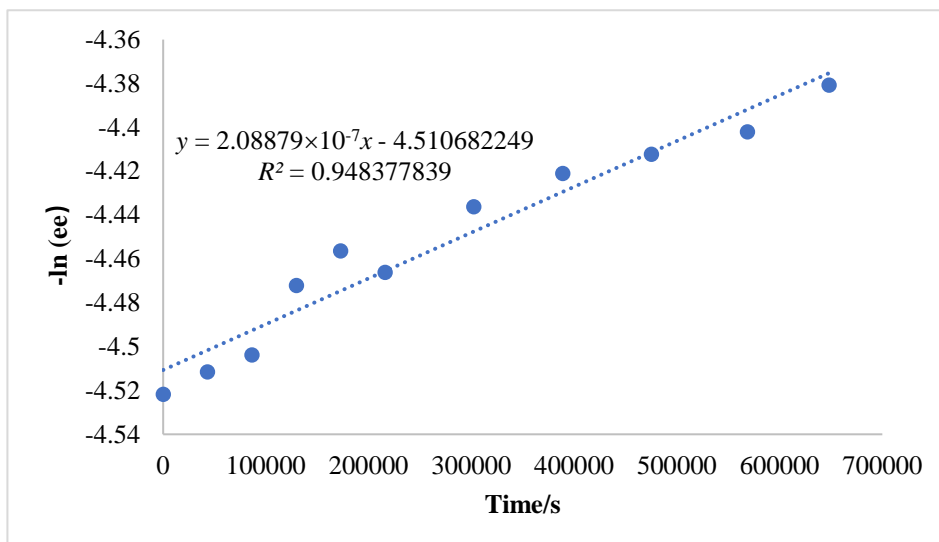

**Supplementary Fig. 5. Racemization experiments of 2n.**

$k_{2n \text{ racemization}} = 2.08879 \times 10^{-7} \text{ s}^{-1}$ ,  $k_{2n \text{ enantiomerisation}} = 1.04439 \times 10^{-7} \text{ s}^{-1}$ ;

$T^{140}_{1/2} = 921.8 \text{ h}$ ;  $\Delta G^\ddagger = 37.05 \text{ kcal mol}^{-1}$ .

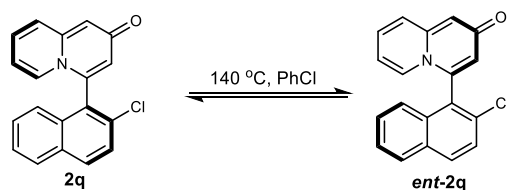

| Time (s) | ee    | -ln(ee)      |
|----------|-------|--------------|
| 0        | 62.84 | -4.140591813 |
| 43200    | 62.56 | -4.136126096 |
| 129600   | 62.08 | -4.128423876 |
| 216000   | 61.56 | -4.120012309 |
| 302400   | 61.36 | -4.116758157 |
| 475200   | 60.93 | -4.109725664 |
| 568800   | 60.63 | -4.10478982  |

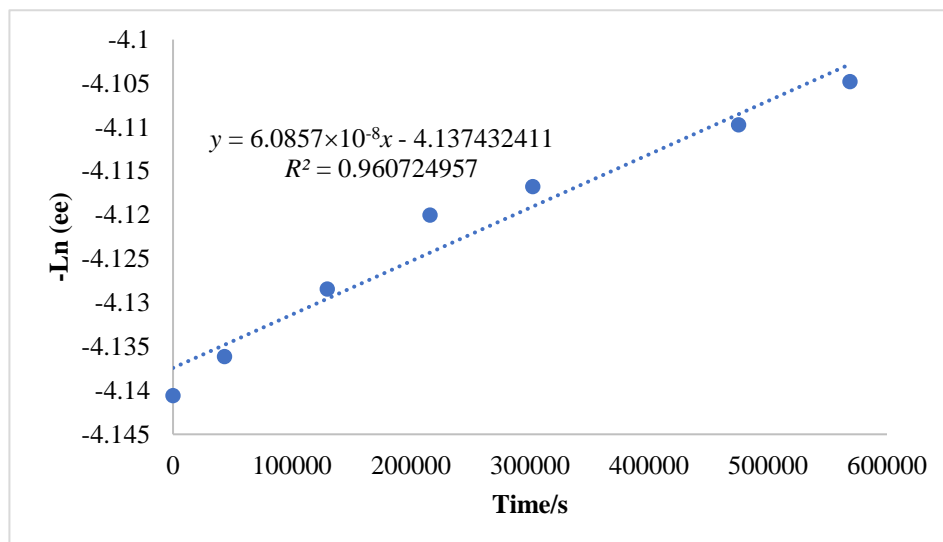

**Supplementary Fig. 6. Racemization experiments of 2q.**

$k_{2q}$  racemization =  $6.0857 \times 10^{-8} \text{ s}^{-1}$ ,  $k_{2q}$  enantiomerisation =  $3.0428 \times 10^{-8} \text{ s}^{-1}$ ;

$T^{140}_{1/2} = 3163.8 \text{ h}$ ;  $\Delta G^\ddagger = 38.21 \text{ kcal mol}^{-1}$ .

**Procedure for gram-scale reaction of 2b.**

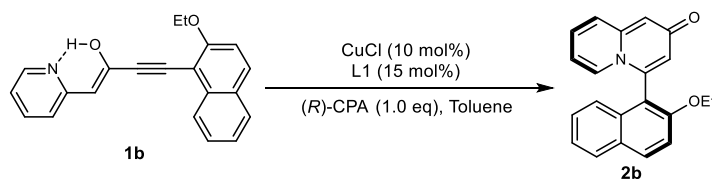

To a flame-dried round-bottom flask equipped with a stirring bar was added CuCl (40 mg, 10 mol%), **L1** (340 mg, 15 mol%) and toluene (50 mL). The reaction was stirred at room temperature for 30 min. Then the corresponding substrate **1b** (1260 mg, 4 mmol, 1.0 eq) and chiral phosphoric acid (1390 mg, 4 mmol, 1.0 eq) were added. The reaction was stirred at 20 °C for 36 h. Then, the mixture was diluted with EA and washed with 1 N NaOH for three times. The combined extracts were dried over anhydrous Na<sub>2</sub>SO<sub>4</sub>, filtered and concentrated in vacuo. The product was purified by column chromatograph over silica gel affording **2b** in 86% yield (1.09 g) with 92% ee.

**Synthetic transformations.**

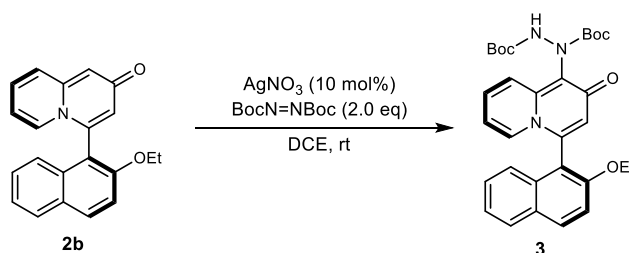



To a 2 dram scintillation vial equipped with a magnetic stirring bar was added substrate **2b** (31.5 mg, 1.0 eq), diazene compound (46 mg, 2.0 eq) and AgNO<sub>3</sub> (1.7 mg, 10 mol%). The vial was then charged with DCE (1.0 mL) and stirred at room temperature for a certain time. After the completion of the reaction (detected by TLC), saturated NH<sub>4</sub>Cl aqueous was added and the reaction mixture was extracted with DCM (10 mL×3). The combined extracts were washed with brine, dried with Na<sub>2</sub>SO<sub>4</sub>, filtered and concentrated in vacuo. The residue was purified by column chromatograph over silica gel to afford **3**.

**3**, di-*tert*-butyl 1-(4-(2-ethoxynaphthalen-1-yl)-2-oxo-2*H*-quinolizin-1-yl) -hydrazine-1,2-dicarboxylate

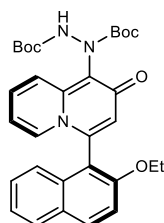

26.2 mg, 48% yield, white solid, m.p. 111-112 °C. [ $\alpha$ ]<sub>D</sub><sup>25</sup> -160.3 (*c* = 0.4, CHCl<sub>3</sub>). **<sup>1</sup>H NMR (500 MHz, Chloroform-*d*)**  $\delta$ : 8.42 – 8.26 (m, 1H), 8.09 (d, *J* = 9.2 Hz, 1H), 7.96 – 7.90 (m, 1H), 7.42 (td, *J* = 18.2, 14.6, 11.2 Hz, 5H), 7.31 (d, *J* = 8.5 Hz, 1H), 6.96 (s, 1H), 6.45 (t, *J* = 7.1 Hz, 1H), 4.19 (ddd, *J* = 16.6, 10.5, 4.9 Hz, 2H), 1.62 – 1.40 (m, 18H), 1.30 – 1.28 (m, 3H). **<sup>13</sup>C NMR (126 MHz, Chloroform-*d*)**  $\delta$ : 170.33, 154.86, 153.22, 142.46, 140.09, 138.23, 131.53, 128.29, 127.88, 127.30, 127.18, 125.60, 123.60, 122.57, 120.82, 113.77, 112.79, 111.44, 79.59, 63.85, 28.67, 27.35, 27.32, 27.16, 26.96, 21.66, 13.78. **HRMS(ESI) m/z**: calculated for [C<sub>31</sub>H<sub>35</sub>N<sub>3</sub>O<sub>6</sub> + H]<sup>+</sup> 546.2604, found 546.2594. **HPLC data** (Chiralpak AD column, hexane : isopropanol = 85: 15, 1.0 mL/min);, tr = 10.2 min (major), tr = 19.6 min (minor), ee = 88%.

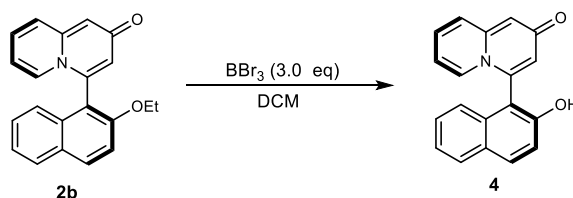

To a 2 dram scintillation vial equipped with a magnetic stirring bar was added substrate **2b** (315 mg, 1.0 mmol, 1.0 eq). The vial was then charged with DCM (10 mL) and stirred at -78 °C for a certain time. Then BBr<sub>3</sub> (750 mg, 3 mmol, 3.0 eq) was added slowly. The vial was warmed up to room temperature and stirred for a certain time. After the completion of the reaction detected

by TLC, saturated NH<sub>4</sub>Cl aqueous was added and the reaction mixture was extracted with DCM (10 mL×3). The combined extracts were washed with brine, dried with Na<sub>2</sub>SO<sub>4</sub>, filtered and concentrated in vacuo. The residue was purified by column chromatograph over silica gel to afford **4**.

**4**, 4-(2-hydroxynaphthalen-1-yl)-2*H*-quinolizin-2-one

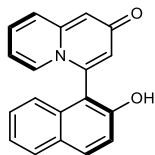

273 mg, 95% yield, white solid, m.p. 76-77 °C.  $[\alpha]_D^{25}$  -152.5 ( $c = 0.3$ , MeOH). **<sup>1</sup>H NMR (500 MHz, DMSO-*d*<sub>6</sub>)**  $\delta$ : 8.07 (d,  $J = 9.0$  Hz, 1H), 7.95 (dd,  $J = 7.0, 2.2$  Hz, 1H), 7.72 (d,  $J = 9.0$  Hz, 1H), 7.61 (d,  $J = 7.4$  Hz, 1H), 7.46 (dd,  $J = 9.0, 6.6$  Hz, 1H), 7.42 – 7.37 (m, 3H), 7.22 – 7.20 (m, 1H), 6.97 (d,  $J = 2.8$  Hz, 1H), 6.82 (d,  $J = 2.8$  Hz, 1H), 6.78 (t,  $J = 7.0$  Hz, 1H), 4.40 (s, 1H). **<sup>13</sup>C NMR (126 MHz, DMSO-*d*<sub>6</sub>)**  $\delta$ : 174.60, 154.19, 145.54, 142.08, 132.84, 132.48, 129.91, 128.91, 128.30, 128.22, 125.79, 124.55, 123.87, 122.85, 118.82, 113.20, 111.55, 110.71, 59.92, 49.07. **HRMS(ESI) m/z**: calculated for [C<sub>40</sub>H<sub>30</sub>N<sub>2</sub>O<sub>4</sub> + H]<sup>+</sup> 288.1025, found 288.1021. **HPLC data** (Chiralpak IA column, hexane : isopropanol = 65: 35, 1.0 mL/min):  $t_r = 25.2$  min (major),  $t_r = 33.0$  min (minor), ee = 92%.

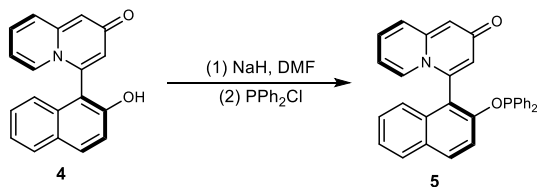

To a 2 dram scintillation vial equipped with a magnetic stirring bar was added substrate **4** (28.8 mg, 0.1 mmol, 1.0 eq), DMF (1.0 mL). The vial was cooled to 0 °C and stirred at the same temperature for a 10 min. Then NaH (60% dispersion in mineral oil) (8.0 mg, 0.2 mmol, 2.0 eq) was added and the mixture was stirred at this temperature for 30 min. Subsequently, ClPPh<sub>2</sub> (44 mg, 0.2 mmol, 2.0 eq) was added and the reaction was warmed up to room temperature. After the completion of the reaction detected by TLC, saturated NH<sub>4</sub>Cl aqueous was added and the reaction mixture was extracted with EA (10 mL×3). The combined extracts were washed with brine, dried with Na<sub>2</sub>SO<sub>4</sub>, filtered and concentrated in vacuo. The residue was purified by column chromatograph over silica gel to afford **5**.

5, 4-(2-((diphenylphosphanyl)oxy)naphthalen-1-yl)-2H-quinolizin-2-one

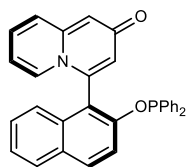

28.5 mg, 61% yield, white solid, m.p. 72-73 °C.  $[\alpha]_D^{25}$  -84.0 ( $c = 0.9$ ,  $\text{CHCl}_3$ ).  **$^1\text{H NMR}$  (500 MHz, Chloroform-*d*)**  $\delta$ : 7.98 (d,  $J = 9.1$  Hz, 1H), 7.91 – 7.89 (m, 1H), 7.85 (d,  $J = 9.1$  Hz, 1H), 7.72 – 7.68 (m, 2H), 7.50 (dtd,  $J = 8.1, 4.3, 1.5$  Hz, 2H), 7.49 – 7.37 (m, 7H), 7.26 – 7.20 (m, 4H), 7.00 (dd,  $J = 9.1, 6.5$  Hz, 1H), 6.81 (d,  $J = 2.7$  Hz, 1H), 6.75 (d,  $J = 2.7$  Hz, 1H), 6.28 – 6.25 (m, 1H).  **$^{13}\text{C NMR}$  (126 MHz, Chloroform-*d*)**  $\delta$ : 174.24, 146.28, 146.22, 144.06, 138.97, 131.97, 131.57, 130.93, 130.64, 130.55, 129.89, 129.81, 128.53, 127.93, 127.83, 127.58, 127.56, 127.48, 127.43, 125.61, 125.21, 123.26, 123.04, 119.22, 117.70, 111.33, 110.69.  **$^{31}\text{P NMR}$  (202 MHz, Chloroform-*d*)**  $\delta$ : 32.15. **HRMS(ESI)  $m/z$** : calculated for  $[\text{C}_{31}\text{H}_{22}\text{NO}_2\text{P} + \text{H}]^+$  472.1466, found 472.1461. **HPLC data** (Chiralpak IA column, hexane : isopropanol = 70: 30, 1.0 mL/min):  $t_r = 22.6$  min (major),  $t_r = 17.6$  min (minor), ee = 90%.

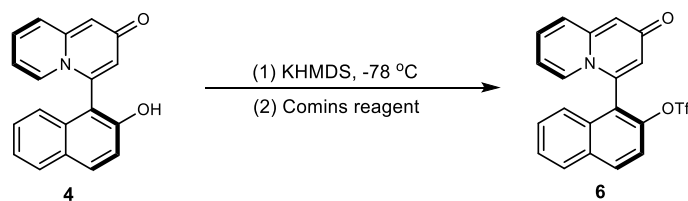

To a flame-dried round-bottom flask equipped with a magnetic stirring bar was added substrate **4** (288 mg, 1.0 mmol, 1.0 eq). The vial was then charged with THF (10 mL) and stirred at -78 °C for a certain time. Then KHMDS (1.0 M in THF, 2.0 mL, 2.0 eq) was added. The reaction was stirred at the same temperature for 1.0 h. Then Comins reagent (780 mg, 2.0 eq) was added in portions and the reaction was stirred at the same temperature for same time. After the completion of the reaction detected by TLC, saturated  $\text{NH}_4\text{Cl}$  aqueous was added and the reaction mixture was extracted with EA (10 mL $\times$ 3). The combined extracts were washed with brine, dried with  $\text{Na}_2\text{SO}_4$ , filtered and concentrated in vacuo. The residue was purified by column chromatograph over silica gel to afford **6**.

6, 1-(2-oxo-2H-quinolizin-4-yl)naphthalen-2-yl trifluoromethanesulfonate

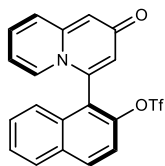

348.6 mg, 83% yield, white solid, m.p. 94-95 °C.  $[\alpha]_{\text{D}}^{25}$  -52.8 ( $c = 0.5$ ,  $\text{CHCl}_3$ ).  **$^1\text{H NMR}$  (500 MHz, Chloroform-*d*)**  $\delta$ : 8.27 (d,  $J = 9.2$  Hz, 1H), 8.09 (d,  $J = 8.2$  Hz, 1H), 7.69 (t,  $J = 7.6$  Hz, 1H), 7.64 – 7.58 (m, 2H), 7.48 (d,  $J = 8.9$  Hz, 1H), 7.38 – 7.31 (m, 3H), 7.10 (s, 1H), 7.02 (s, 1H), 6.65 (t,  $J = 6.9$  Hz, 1H).  **$^{13}\text{C NMR}$  (126 MHz, Chloroform-*d*)**  $\delta$ : 172.57, 144.56, 143.79, 136.95, 133.07, 131.56, 130.42, 129.36, 128.78, 128.43, 128.10, 127.38, 125.08, 124.02, 123.54, 120.96, 118.62, 115.88, 113.48, 110.79.  **$^{19}\text{F NMR}$  (470 MHz, Chloroform-*d*)**  $\delta$ : -73.80. **HRMS(ESI)  $m/z$** : calculated for  $[\text{C}_{20}\text{H}_{12}\text{F}_3\text{NO}_4\text{S} + \text{H}]^+$  420.0517, found 420.0507. **HPLC data** (Chiralpak OD column, hexane : isopropanol = 70: 30, 1.0 mL/min):  $t_{\text{r}} = 7.0$  min (major),  $t_{\text{r}} = 10.7$  min (minor),  $ee = 91\%$ .

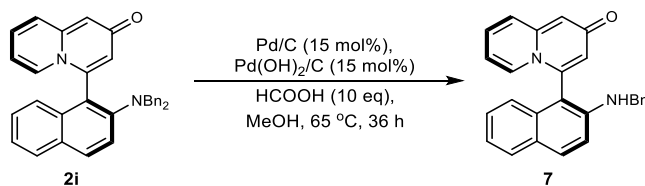

To a 2 dram scintillation vial equipped with a magnetic stirring bar was added substrate **2i** (46.6 mg, 0.1 mmol, 1.0 eq), HCOOH (46 mg, 1 mmol, 10 eq), Pd/C (0.015 mmol, 15 mol%), PdOH/C (0.015 mmol, 15 mol%) and MeOH (1.0 mL). The vial was stirred at 65 °C for a certain time. After the completion of the reaction detected by TLC, saturated  $\text{NH}_4\text{Cl}$  aqueous was added and the reaction mixture was extracted with DCM (10 mL $\times$ 3). The combined extracts were washed with brine, dried with  $\text{Na}_2\text{SO}_4$ , filtered and concentrated in vacuo. The residue was purified by column chromatograph over silica gel to afford **7**.

**7, 4-(2-(benzylamino)naphthalen-1-yl)-2H-quinolizin-2-one**

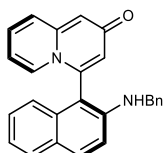

30.4 mg, 81% yield, white solid, m.p. 217-218 °C.  $[\alpha]_{\text{D}}^{25}$  -43.0 ( $c = 0.2$ ,  $\text{CHCl}_3$ ).  **$^1\text{H NMR}$  (500 MHz, Chloroform-*d*)**  $\delta$ : 7.86 (d,  $J = 9.0$  Hz, 1H), 7.78 (d,  $J = 8.0$  Hz, 1H), 7.37 – 7.34 (m, 2H), 7.29 – 7.27 (m, 6H), 7.21 (q,  $J = 4.4$  Hz, 1H), 7.13 (dd,  $J = 8.8, 4.8$  Hz, 2H), 7.02 (d,  $J = 8.4$  Hz,

1H), 6.97 (d,  $J = 2.8$  Hz, 1H), 6.72 (d,  $J = 2.7$  Hz, 1H), 6.38 (t,  $J = 6.9$  Hz, 1H), 5.14 (s, 1H), 4.54 (dd,  $J = 6.0, 3.8$  Hz, 2H).  $^{13}\text{C}$  NMR (126 MHz, Chloroform-*d*)  $\delta$ : 175.06, 144.66, 143.14, 140.72, 137.96, 131.55, 130.88, 128.25, 127.90, 127.65, 127.37, 126.96, 126.19, 126.07, 125.90, 125.71, 123.65, 121.63, 121.04, 113.16, 111.31, 110.89, 106.99, 46.30. HRMS(ESI)  $m/z$ : calculated for  $[\text{C}_{26}\text{H}_{20}\text{N}_2\text{O} + \text{H}]^+$  377.1654, found 377.1651. HPLC data (Chiralpak IG column, hexane : isopropanol = 50: 50, 1.0 mL/min): tr = 28.0 min (major), tr = 13.6 min (minor), ee = 97%.

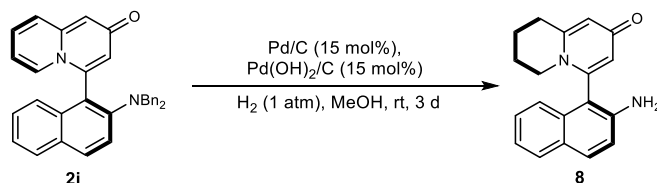

To a 2 dram scintillation vial equipped with a magnetic stirring bar was added substrate **2i** (46 mg, 0.1 mmol, 1.0 eq), Pd/C (0.015 mmol, 15 mol%), Pd(OH)<sub>2</sub>/C (0.015 mmol, 15 mol%) and MeOH (1.0 mL). The vial was purged with N<sub>2</sub> for 3 times and then charged with a H<sub>2</sub> balloon. The mixture was stirred at room temperature for a certain time. After the completion of the reaction detected by TLC, saturated NH<sub>4</sub>Cl aqueous was added and the reaction mixture was extracted with DCM (10 mL×3). The combined extracts were washed with brine, dried with Na<sub>2</sub>SO<sub>4</sub>, filtered and concentrated in vacuo. The residue was purified by column chromatograph over silica gel to afford **8**.<sup>4</sup>

**8**, 4-(2-aminonaphthalen-1-yl)-6,7,8,9-tetrahydro-2*H*-quinolizin-2-one

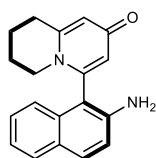

26 mg, 89% yield, white solid, m.p. 295-296 °C.  $[\alpha]_{\text{D}}^{25}$  -19.6 ( $c = 0.5$ , CHCl<sub>3</sub>).  $^1\text{H}$  NMR (500 MHz, Chloroform-*d*)  $\delta$ : 7.91 (d,  $J = 9.0$  Hz, 1H), 7.80 (dd,  $J = 8.2, 1.3$  Hz, 1H), 7.41 (ddd,  $J = 8.4, 6.8, 1.3$  Hz, 1H), 7.29 (ddd,  $J = 8.0, 6.8, 1.2$  Hz, 1H), 7.17 (dd,  $J = 8.9, 2.2$  Hz, 2H), 6.51 – 6.49 (m, 2H),  $\delta$  3.53 (ddd,  $J = 12.6, 7.2, 5.2$  Hz, 1H), 3.45 (ddd,  $J = 13.6, 7.0, 5.3$  Hz, 1H), 2.97 (s, 2H), 2.93 (t,  $J = 6.8$  Hz, 2H), 1.89 (dt,  $J = 11.9, 6.7$  Hz, 2H), 1.79 (td,  $J = 7.0, 5.3$  Hz, 2H).  $^{13}\text{C}$  NMR (126 MHz, Chloroform-*d*)  $\delta$ : 178.01, 150.73, 146.66, 142.36, 138.13, 131.60, 130.05, 127.71, 126.24, 125.77, 121.46, 120.10, 116.08, 112.98, 109.69, 46.47, 44.79, 27.79, 21.59. HRMS(ESI)  $m/z$ : calculated for  $[\text{C}_{19}\text{H}_{18}\text{N}_2\text{O} + \text{H}]^+$  291.1497, found 291.1489. HPLC data

(Chiralpak AD column, hexane : isopropanol = 70: 30, 1.0 mL/min):  $t_r$  = 12.1 min (major),  $t_r$  = 14.7 min (minor), ee = 99%.

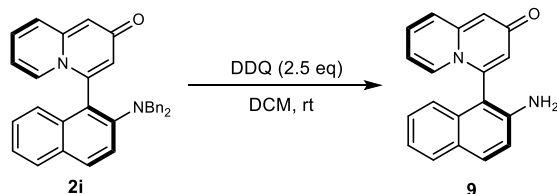

To a flame-dried round-bottom flask equipped with a magnetic stirring bar was added substrate **2i** (466 mg, 1.0 mmol, 1.0 eq), DDQ (270 mg, 2.5 mmol, 2.5 eq). The vial was then charged with DCM (10 mL) and stirred at room temperature for a certain time. After the completion of the reaction detected by TLC, saturated  $\text{NH}_4\text{Cl}$  aqueous was added and the reaction mixture was extracted with DCM (10 mL $\times$ 3). The combined extracts were washed with brine, dried with  $\text{Na}_2\text{SO}_4$ , filtered and concentrated in vacuo. The residue was purified by column chromatograph over silica gel to afford **9**.

#### **9**, 4-(2-aminonaphthalen-1-yl)-2*H*-quinolizin-2-one

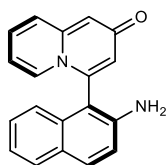

60.1 mg, 21% yield, white solid, m.p. 209-210 °C.  $[\alpha]_D^{25}$  -25.9 ( $c$  = 0.5,  $\text{CHCl}_3$ ).  **$^1\text{H NMR}$  (500 MHz, Chloroform-*d*)**  $\delta$ : 7.81 (d,  $J$  = 8.8 Hz, 1H), 7.77 (d,  $J$  = 7.8 Hz, 1H), 7.40 (d,  $J$  = 7.2 Hz, 1H), 7.32 – 7.28 (m, 3H), 7.13 (t,  $J$  = 7.2 Hz, 2H), 7.01 – 6.98 (m, 2H), 6.75 (s, 1H), 6.40 (t,  $J$  = 6.9 Hz, 1H), 4.45 (s, 2H).  **$^{13}\text{C NMR}$  (126 MHz, Chloroform-*d*)**  $\delta$ : 174.35, 144.68, 142.67, 141.11, 131.49, 130.82, 128.42, 128.33, 127.45, 126.92, 126.41, 125.34, 123.68, 121.82, 121.01, 117.54, 111.98, 110.49, 106.31. **HRMS(ESI)  $m/z$** : calculated for  $[\text{C}_{19}\text{H}_{14}\text{N}_2\text{O} + \text{H}]^+$  287.1184, found 287.1179. **HPLC data** (Chiralpak IG column, hexane : isopropanol = 50: 50, 1.0 mL/min):  $t_r$  = 17.0 min (major),  $t_r$  = 11.1 min (minor), ee = 98%.

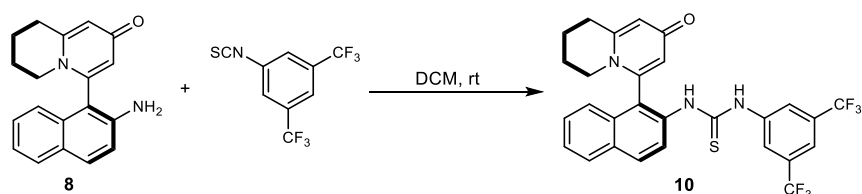

To a 2 dram scintillation vial equipped with a magnetic stirring bar was added substrate **8** (29.1 mg, 0.1 mmol, 1.0 eq), 3, 5-bis(trifluoromethyl)phenyl isothiocyanate (67.8 mg, 0.25 mmol, 2.5 eq). The vial was then charged with DCM (1.0 mL) and stirred at room temperature for a certain time. After the completion of the reaction detected by TLC, saturated NH<sub>4</sub>Cl aqueous was added and the reaction mixture was exacted with DCM (10 mL×3). The combined extracts were washed with brine, dried with Na<sub>2</sub>SO<sub>4</sub>, filtered and concentrated in vacuo. The residue was purified by column chromatograph over silica gel to afford **10**.

**10**, 1-(3,5-bis(trifluoromethyl)phenyl)-3-(1-(2-oxo-6,7,8,9-tetrahydro-2H-quinolizin-4-yl)naphthalen-2-yl)thiourea

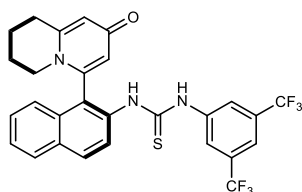

37.5 mg, 67 % yield, white solid, m.p. 138-139 °C.  $[\alpha]_D^{25} +205.0$  ( $c = 0.5$ , CHCl<sub>3</sub>). **<sup>1</sup>H NMR (500 MHz, Chloroform-*d*)**  $\delta$ : 11.71 (s, 1H), 10.52 (s, 1H), 8.49 (s, 2H), 8.11 (d,  $J = 8.7$  Hz, 1H), 8.01 (d,  $J = 8.9$  Hz, 1H), 7.94 (d,  $J = 8.1$  Hz, 1H), 7.63 (d,  $J = 14.4$  Hz, 1H), 7.55 (t,  $J = 7.5$  Hz, 1H), 7.49 (d,  $J = 8.2$  Hz, 1H), 7.36 (d,  $J = 8.5$  Hz, 1H), 6.49 (s, 1H), 6.38 (s, 1H), 3.95 (t,  $J = 10.1$  Hz, 1H), 3.46 (dd,  $J = 13.5, 6.6$  Hz, 1H), 2.93 (s, 2H), 1.89 – 1.75 (m, 4H). **<sup>13</sup>C NMR (126 MHz, Chloroform-*d*)**  $\delta$ : 179.86, 176.23, 151.94, 147.44, 140.73, 134.90, 130.96, 130.73, 130.70, 130.43, 128.07 (q,  $J = 128.07$ ), 126.50, 125.64, 124.30, 123.47, 122.96, 121.30, 120.74, 119.89, 115.99, 115.54, 46.58, 27.91, 21.28, 17.12. **<sup>19</sup>F NMR (470 MHz, Chloroform-*d*)**  $\delta$ : -62.82. **HRMS(ESI) m/z**: calculated for [C<sub>28</sub>H<sub>21</sub>F<sub>6</sub>N<sub>3</sub>OS+ Na]<sup>+</sup> 584.1207, found 584.1199. **HPLC data** (Chiralpak OD column, hexane : isopropanol = 70: 30, 1.0 mL/min):  $t_r = 4.1$  min (major),  $t_r = 6.5$  min (minor), ee = 99%.

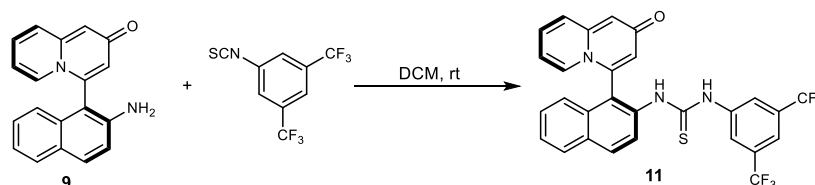

To a 2 dram scintillation vial equipped with a magnetic stirring bar was added substrate **9** (28.7 mg, 0.1 mmol, 1.0 eq), 3, 5-bis(trifluoromethyl)phenyl isothiocyanate (67.8 mg, 0.25 mmol,

2.5 eq). The vial was then charged with DCM (1.0 mL) and stirred at room temperature for a certain time. After the completion of the reaction detected by TLC, saturated NH<sub>4</sub>Cl aqueous was added and the reaction mixture was extracted with DCM (10 mL×3). The combined extracts were washed with brine, dried with Na<sub>2</sub>SO<sub>4</sub>, filtered and concentrated in vacuo. The residue was purified by column chromatograph over silica gel to afford **11**.

**11**, 1-(3,5-bis(trifluoromethyl)phenyl)-3-(1-(2-oxo-2*H*-quinolizin-4-yl) naphthalen-2-yl)thiourea

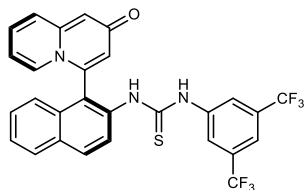

25.4 mg, 46% yield, white solid, m.p. 120-121 °C.  $[\alpha]_D^{25} +57.0$  ( $c = 0.1$ , CHCl<sub>3</sub>). **<sup>1</sup>H NMR (500 MHz, Chloroform-*d*)**  $\delta$ : 11.52 (s, 1H), 10.59 (s, 1H), 8.36 (s, 2H), 8.21 (d,  $J = 8.9$  Hz, 1H), 8.11 (d,  $J = 8.9$  Hz, 1H), 7.99 (d,  $J = 8.2$  Hz, 1H), 7.84 (d,  $J = 7.4$  Hz, 1H), 7.63 (s, 1H), 7.57 (t,  $J = 7.6$  Hz, 1H), 7.44 (t,  $J = 7.7$  Hz, 1H), 7.34 (d,  $J = 4.4$  Hz, 2H), 7.28 (d,  $J = 8.5$  Hz, 1H), 6.98 (s, 1H), 6.65 (q,  $J = 3.9$  Hz, 1H), 6.57 (s, 1H). **<sup>13</sup>C NMR (126 MHz, Chloroform-*d*)**  $\delta$ : 181.43, 173.86, 145.86, 142.10, 141.42, 141.36, 137.14, 132.08, 131.83 (q,  $J = 130.44$ ), 131.12, 130.82, 130.47, 128.69, 127.84, 127.79, 126.72, 126.17, 124.42, 124.22, 123.71, 123.18, 122.26, 117.27, 114.41, 110.73. **<sup>19</sup>F NMR (470 MHz, Chloroform-*d*)**  $\delta$ : -62.83. **HRMS(ESI) m/z**: calculated for [C<sub>28</sub>H<sub>17</sub>F<sub>6</sub>N<sub>3</sub>OS + H]<sup>+</sup> 558.1075, found 558.1069. **HPLC data** (Chiralpak OD column, hexane : isopropanol = 70: 30, 1.0 mL/min): tr = 4.5 min (major), tr = 8.2 min (minor), ee = 97%.

#### Application of **10** for enantioselective Michael addition.

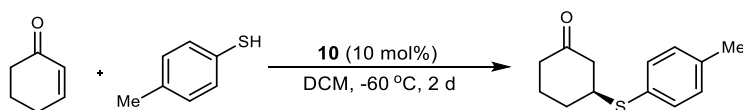

To a 2 dram scintillation vial equipped with a magnetic stirring bar was added cyclohex-2-en-1-one (9 mg, 0.1 mmol, 1.0 eq), catalyst **10** (5.8 mg, 0.01 mmol, 10 mol%) and DCM (1.0 mL). The vial was cooled to -60 °C. After the reaction was stirred at this temperature for 10 min, 4-methylbenzenethiol (24.8 mg, 0.2 mmol, 2.0 eq) was added and the mixture was stirred at the same temperature for 2 days. Then the saturated NH<sub>4</sub>Cl aqueous was added to quench the reaction. The reaction mixture was warmed up to room temperature and extracted with DCM (10 mL×3). The combined extracts were washed with brine, dried with Na<sub>2</sub>SO<sub>4</sub>, filtered and



concentrated in vacuo. The residue was purified by column chromatograph over silica gel to afford the desired product.<sup>5</sup> 16.5 mg, 76% yield. **HPLC data** (Daicel Chiralpak AD column, hexane : isopropanol = 90: 10, 1.0 mL/min):  $t_r = 6.3$  min (major),  $t_r = 7.1$  min (minor), ee = 39%.

## Supplementary Discussion

### <sup>1</sup>H NMR and <sup>31</sup>P NMR spectrum of **1b** and CPA

Considering the co-existence of the *enol* and *keto* equivalent of **1b**, we investigated the interactions of (*R*)-CPA and **1b** by <sup>1</sup>H-NMR and <sup>31</sup>P-NMR. As can be seen from Supplementary Fig. 7, the original ratio of *enol/keto* was calculated as 2.5:1 by <sup>1</sup>H-NMR spectroscopy, and the H<sub>a</sub> and H<sub>b</sub> signals were recorded as  $\delta$  4.31 and  $\delta$  5.99. In the case of addition of (*R*)-CPA (Supplementary Fig. 8), the ratio of *enol/keto* was decreased to 1.4/1. Moreover, the mixture of (*R*)-CPA (1.0 equiv) and **1b** (1.0 equiv) exhibited, two signals ( $\delta$  4.50 and  $\delta$  5.92) for H<sub>a</sub> and H<sub>b</sub> respectively, at a significantly different chemical shift compared to **1b** in the absence of the CPA additive. The interactions were further confirmed by <sup>31</sup>P-NMR studies in DMSO-*d*<sub>6</sub> (Supplementary Fig. 9 and Fig. 10). The chemical shift of (*R*)-CPA is changed from 2.68 to 3.47 in the presence of **1b**.

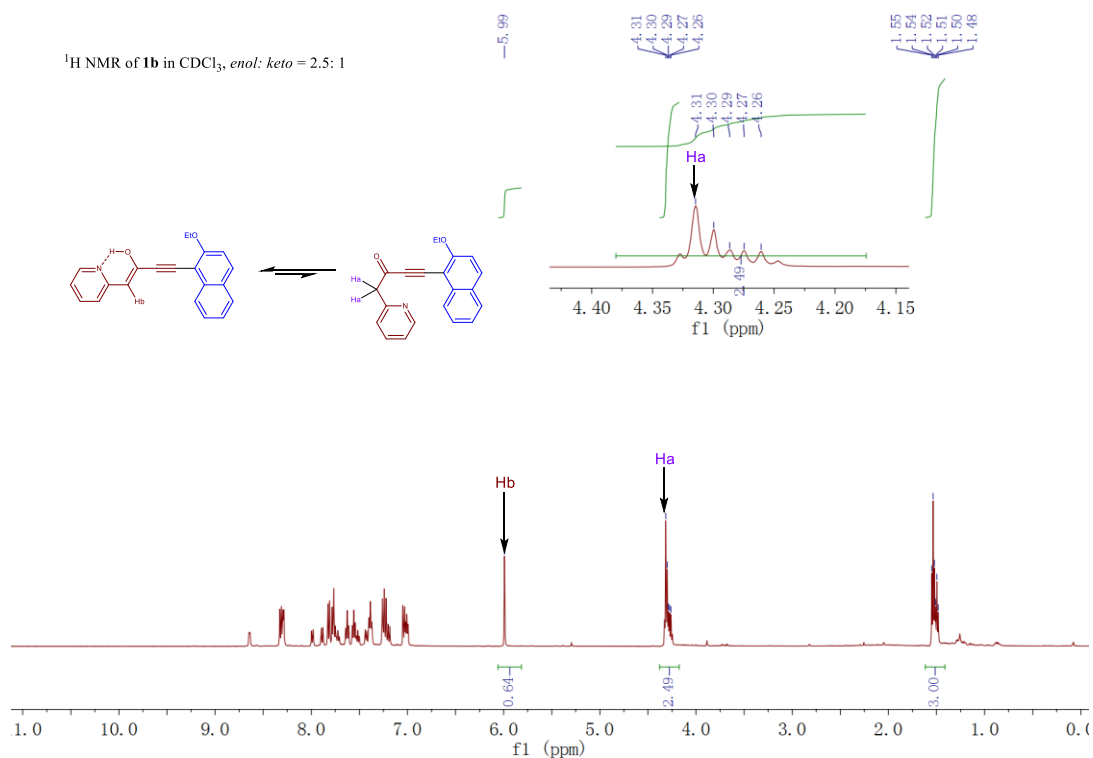

Supplementary Fig. 7. <sup>1</sup>H NMR spectrum of **1b**.

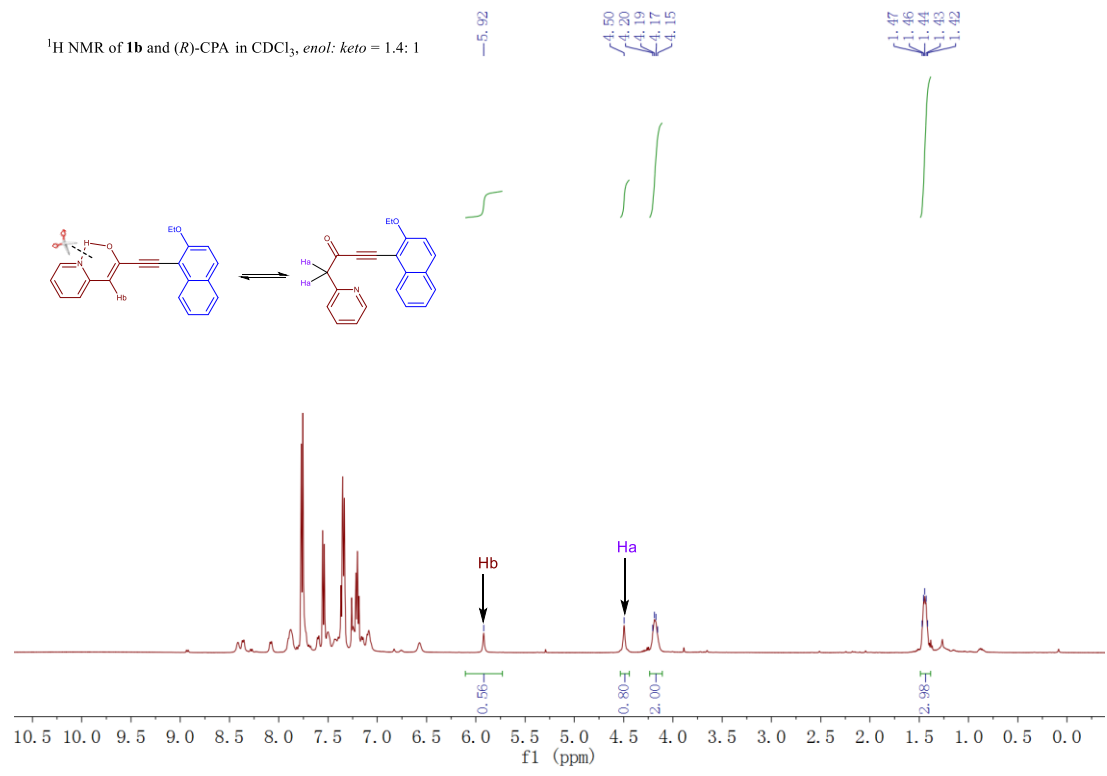

Supplementary Fig. 8. <sup>1</sup>H NMR spectrum of **1b** and (*R*)-CPA.

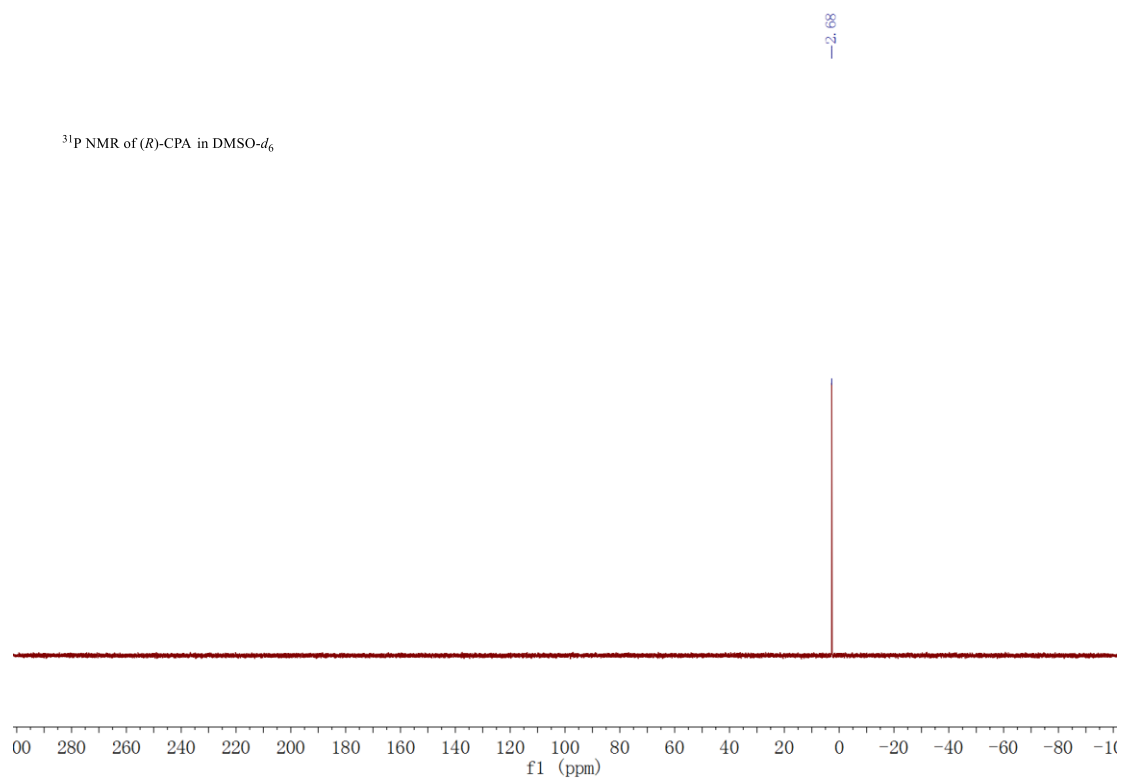

Supplementary Fig. 9. <sup>31</sup>P NMR spectrum of (*R*)-CPA.

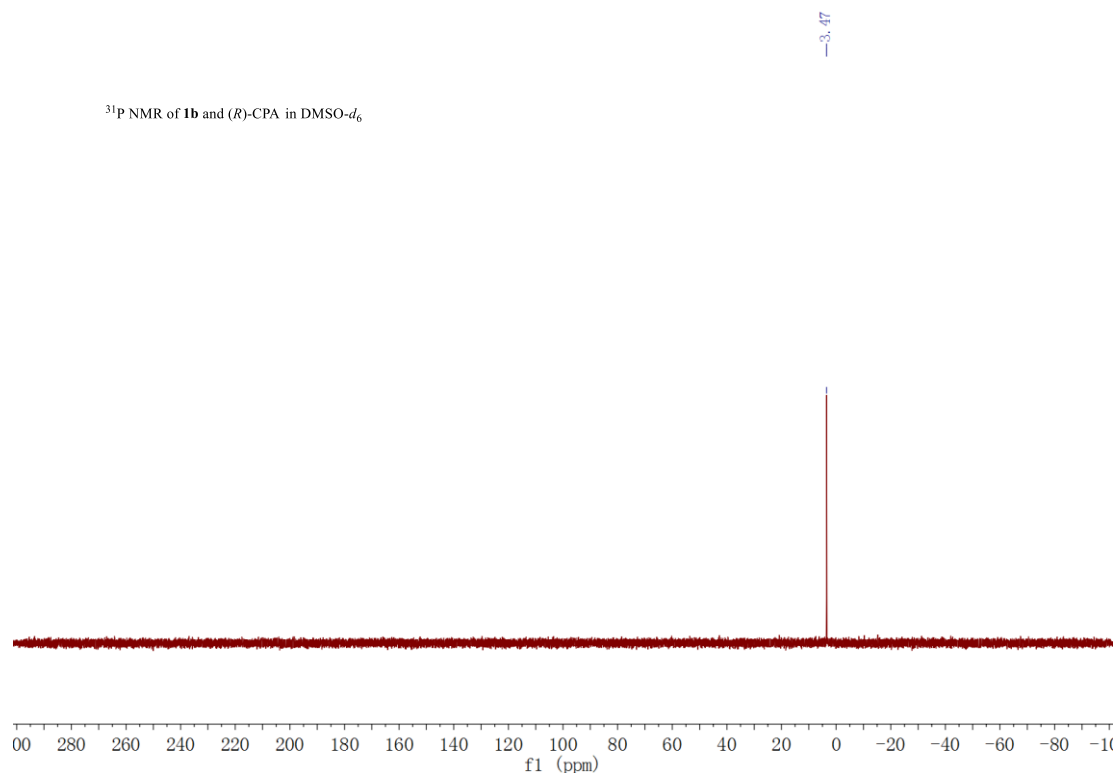

**Supplementary Fig. 10.** <sup>31</sup>P NMR spectrum of **1b** and (*R*)-CPA.

#### **Dynamic <sup>1</sup>H NMR spectrum of **1k** and CPA**

In order to study the ratio of *keto* and *enol* during the reaction, substrate **1k** was taken into consideration in CDCl<sub>3</sub> since the distinguished characteristic peaks between *keto* and ligand. The ratio of *keto* and *enol* during the reaction is unchanged from the dynamic <sup>1</sup>H NMR of the reaction. With the copper catalyst in the reaction system, the proton signals of CH<sub>2</sub> in *keto* moiety were recorded from δ 4.42 to δ 4.28 which indicated the direction of the carbonyl and copper catalyst. Those observations further strengthened our mechanism illustrated in Fig.6 of manuscript.

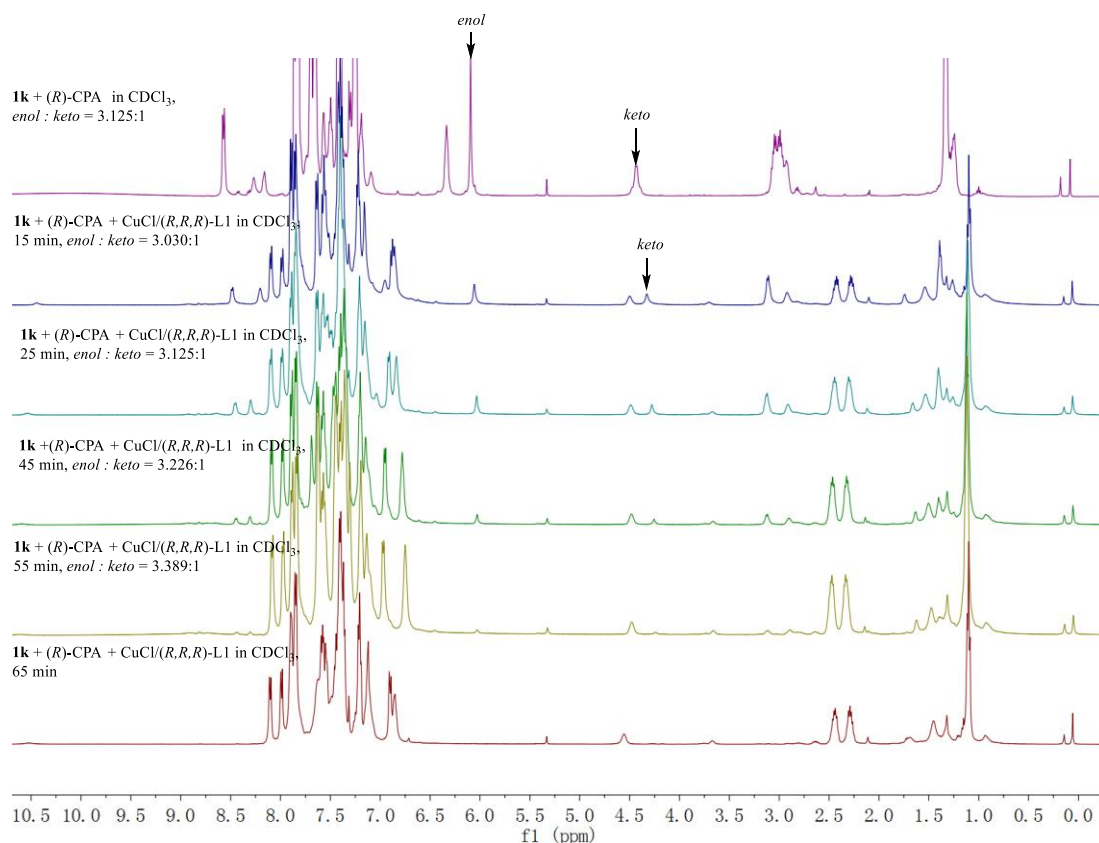

**Supplementary Fig. 11. Dynamic  $^1\text{H}$  NMR spectrum of **1k** and (*R*)-CPA.**

### Linear effect of ligand and product

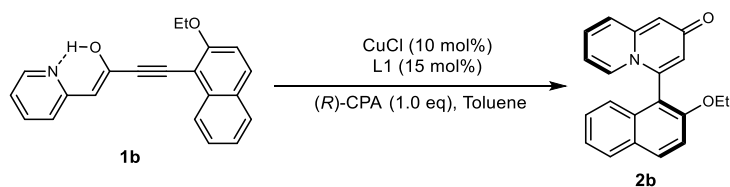

To a vial was added CuCl (1.0 mg, 10 mol%), L1 (8.5 mg, 15 mol%), toluene (2.0 mL) and stirring bar. The vial was wrapped with Teflon tape and fitted with corresponding cap. The vial was stirred at room temperature for 30 min. Then the corresponding substrate **1b** (31.5 mg, 0.1 mmol, 1.0 eq) and chiral phosphoric acid (34.8 mg, 0.1 mmol, 1.0 eq) were added. The reaction was stirred at 20 °C for 36 h. Then, the mixture was diluted with EA and washed with water for three times. The extracts were dried and concentrated in vacuo. The residue was purified by column chromatograph over silica gel. The ee values were determined by chiral HPLC.

|                         |   |      |      |       |      |      |
|-------------------------|---|------|------|-------|------|------|
| ee of L1                | 0 | 24.0 | 37.0 | 54.7  | 77.0 | >99  |
| ee of Product <b>2b</b> | 0 | 15.3 | 30.9 | 49.48 | 68.9 | 92.0 |

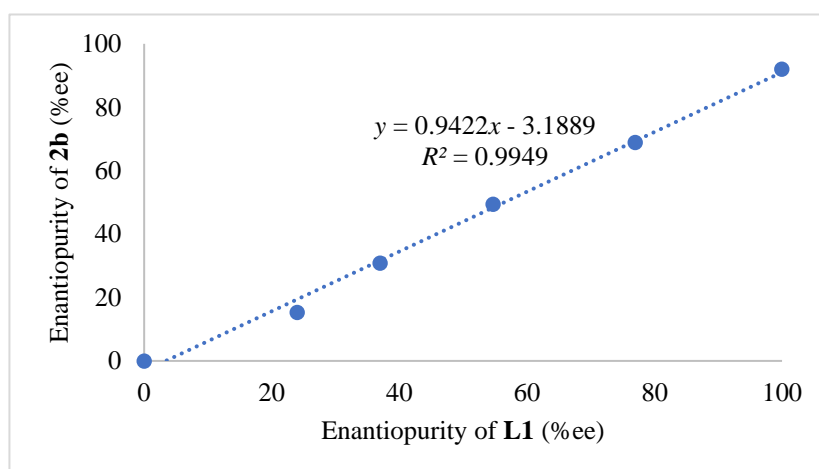

**Supplementary Fig. 12. Linear effect of L1 and 2b.**

**The linear free energy relationship analysis <sup>a</sup>**

**Supplementary Table 4. Literature values for the substituents used in this reaction <sup>6-10</sup>**

| Entry | R               | er          | Charton value | B1   | B5   | L    | $\sigma$ | $\Delta\Delta G^\ddagger(er)$ (kcal/mol) |
|-------|-----------------|-------------|---------------|------|------|------|----------|------------------------------------------|
| 1     | OMe             | 88.06:11.94 | 0.36          | -    | -    | -    | -0.23    | 1.16                                     |
| 2     | OEt             | 96.0:4.0    | 0.48          | -    | -    | -    | -0.24    | 1.85                                     |
| 3     | Ph              | 96.52:3.48  | 0.57          | 1.71 | 3.11 | 6.28 | -0.01    | 1.93                                     |
| 4     | Me              | 92.42:7.58  | 0.52          | 1.52 | 2.04 | 2.87 | -0.17    | 1.46                                     |
| 5     | Et              | 94.02:5.98  | 0.56          | 1.74 | 3.31 | 4.42 | -0.15    | 1.60                                     |
| 6     | <sup>n</sup> Bu | 95.45:4.55  | 0.68          | 1.73 | 3.39 | 5.35 | -0.16    | 1.77                                     |
| 7     | <sup>i</sup> Pr | 96.66:3.34  | 0.76          | 2.05 | 3.35 | 4.36 | -0.12    | 1.96                                     |
| 8     | Cl              | 18.32:81.68 | 0.55          | 1.73 | 1.73 | 3.47 | 0.24     | 0.87                                     |
| 9     | Br              | 16.95:83.05 | 0.65          | 1.95 | 1.95 | 3.85 | 0.23     | 0.93                                     |
| mean  |                 |             | 0.57          | 1.38 | 2.09 | 3.39 | -0.07    | 1.50                                     |
| std.  |                 |             | 0.1172        | 0.79 | 1.35 | 2.16 | 0.18     | 0.42                                     |

<sup>a</sup> $\Delta\Delta G^\ddagger = RT\ln(er)$ ,  $R = 0.001986 \text{ kcal K}^{-1} \text{ mol}^{-1}$ ,  $T = 293.15 \text{ K}$ .

For the purposes of comparison, the selected values were normalized according to this equation:

$$X_N = (X - X_{mean})/S_X$$

Where  $X_N$  is the normalized value,  $X$  is the value selected from the literature,  $X_{mean}$  is the mean for the range of  $X$ , and  $S_X$  is the standard derivation for the range in  $X$ . Supplementary Table 5 was obtained according to this equation.

**Supplementary Table 5. Normalized values for the substituents used in this reaction<sup>a</sup>**

| Entry | R               | er          | Charton<br>value | B1   | B5    | L     | $\sigma$ | $\Delta\Delta G^\ddagger(er)$<br>(kcal/mol) |
|-------|-----------------|-------------|------------------|------|-------|-------|----------|---------------------------------------------|
| 1     | OMe             | 88.06:11.94 | -1.79            | -    | -     | -     | -0.88    | 1.16                                        |
| 2     | OEt             | 96.0:4.0    | -0.77            | -    | -     | -     | -0.94    | 1.85                                        |
| 3     | Ph              | 96.52:3.48  | 0                | 0.41 | 0.75  | 1.33  | 0.31     | 1.93                                        |
| 4     | Me              | 92.42:7.58  | -0.43            | 0.17 | -0.04 | -0.24 | -0.56    | 1.46                                        |
| 5     | Et              | 94.02:5.98  | -0.08            | 0.45 | 0.89  | 0.47  | -0.45    | 1.60                                        |
| 6     | <sup>n</sup> Bu | 95.45:4.55  | 0.94             | 0.44 | 0.96  | 0.89  | -0.50    | 1.77                                        |
| 7     | <sup>i</sup> Pr | 96.66:3.34  | 1.62             | 0.84 | 0.92  | 0.44  | -0.28    | 1.96                                        |
| 8     | Cl              | 18.32:81.68 | -0.17            | 0.43 | -0.27 | 0.03  | 1.66     | 0.87                                        |
| 9     | Br              | 16.95:83.05 | 0.68             | 0.71 | -0.11 | 0.21  | 1.63     | 0.93                                        |

<sup>a</sup> $\Delta\Delta G^\ddagger = RT\ln(er)$ ,  $R = 0.001986 \text{ kcal K}^{-1} \text{ mol}^{-1}$ ,  $T = 293.15 \text{ K}$ .

The steric factor and electronic effect were supposed to affect the enantioselectivity simultaneously. We choose Hammett parameter to describe the electronic effect. In addition, Charton values and Sterimol parameter was used to describe the steric factor. However, after a stepwise regression analysis, we can't develop an appropriate model to elucidate stereoselectivity trends. And this mainly attribute to the fact that Hammett parameter was used to describe the electronic effect when the substituent was located at *para*-or *meta*-position, it can't elucidate the electronic effect when the substituent was located at *ortho*-position.

Supplementary Table 6. Single Crystal of X-ray Analysis of 2h·H<sub>2</sub>O.

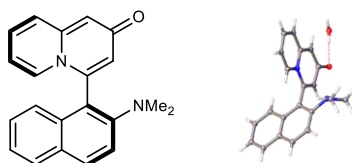

| Identification code                         | <b>2h·H<sub>2</sub>O</b>                                      |
|---------------------------------------------|---------------------------------------------------------------|
| Empirical formula                           | C <sub>21</sub> H <sub>20</sub> N <sub>2</sub> O <sub>2</sub> |
| Formula weight                              | 332.39                                                        |
| Temperature/K                               | 296.15                                                        |
| Crystal system                              | orthorhombic                                                  |
| Space group                                 | P2 <sub>1</sub> 2 <sub>1</sub> 2 <sub>1</sub>                 |
| a/Å                                         | 8.7709(9)                                                     |
| b/Å                                         | 13.1001(14)                                                   |
| c/Å                                         | 15.5884(17)                                                   |
| α/°                                         | 90                                                            |
| β/°                                         | 90                                                            |
| γ/°                                         | 90                                                            |
| Volume/Å <sup>3</sup>                       | 1791.1(3)                                                     |
| Z                                           | 4                                                             |
| ρ <sub>calc</sub> /cm <sup>3</sup>          | 1.233                                                         |
| μ/mm <sup>-1</sup>                          | 0.638                                                         |
| F(000)                                      | 704.0                                                         |
| Crystal size/mm <sup>3</sup>                | 0.12 × 0.11 × 0.08                                            |
| Radiation                                   | CuKα (λ = 1.54178)                                            |
| 2θ range for data collection/°              | 8.816 to 137.78                                               |
| Index ranges                                | -10 ≤ h ≤ 10, -15 ≤ k ≤ 15, -17 ≤ l ≤ 18                      |
| Reflections collected                       | 13749                                                         |
| Independent reflections                     | 3298 [R <sub>int</sub> = 0.0396, R <sub>sigma</sub> = 0.0325] |
| Data/restraints/parameters                  | 3298/0/231                                                    |
| Goodness-of-fit on F <sup>2</sup>           | 1.097                                                         |
| Final R indexes [I >= 2σ (I)]               | R <sub>1</sub> = 0.0315, wR <sub>2</sub> = 0.0812             |
| Final R indexes [all data]                  | R <sub>1</sub> = 0.0328, wR <sub>2</sub> = 0.0813             |
| Largest diff. peak/hole / e Å <sup>-3</sup> | 0.11/-0.19                                                    |
| Flack parameter                             | 0.04(8)                                                       |





**1b**, 4-(2-ethoxynaphthalen-1-yl)-1-(pyridin-2-yl)but-3-yn-2-one / (Z)-4-(2-ethoxynaphthalen-1-yl)-1-(pyridin-2-yl)but-1-en-3-yn-2-ol

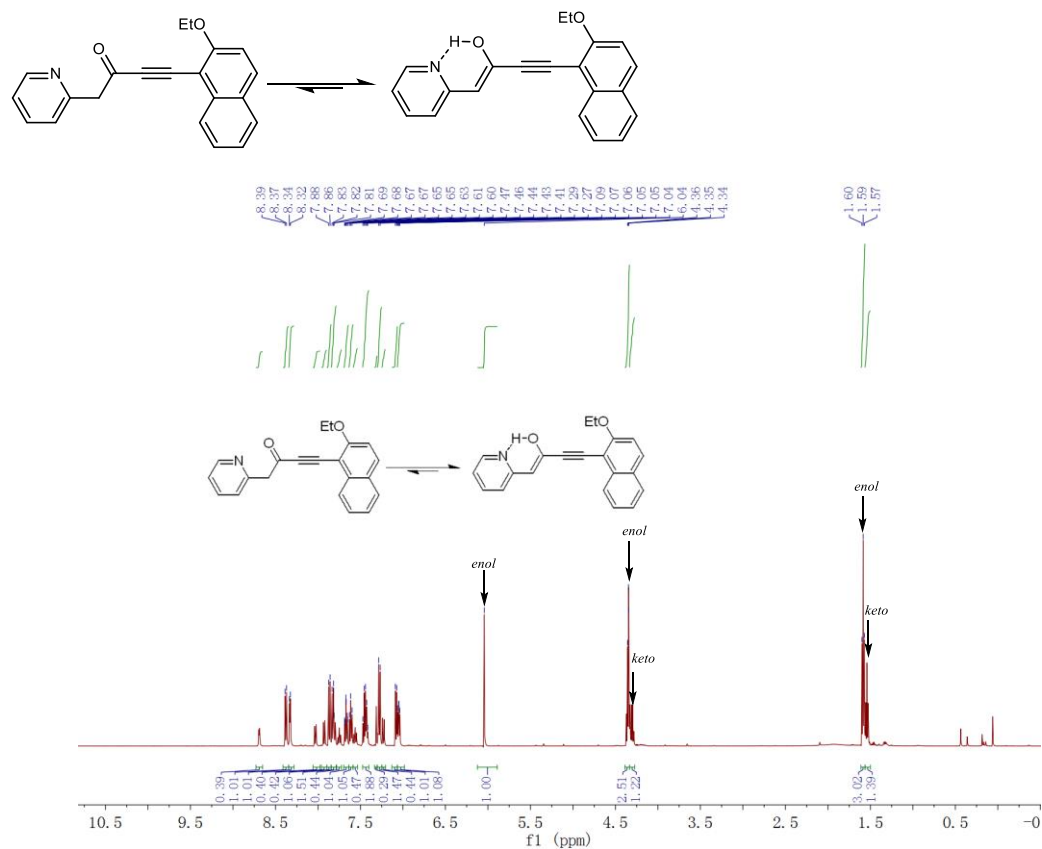

Supplementary Fig. 15. <sup>1</sup>H NMR spectrum of 1b.

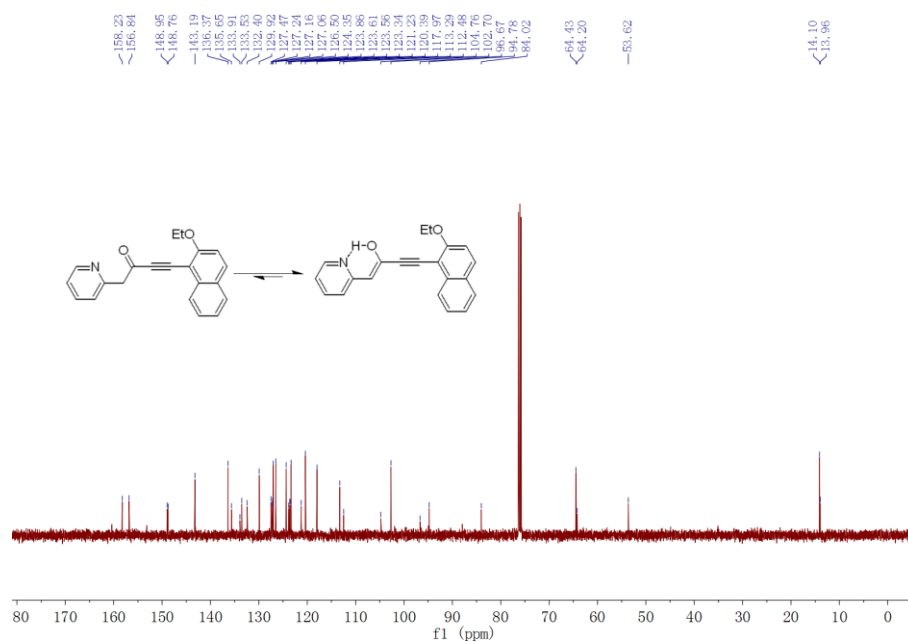

Supplementary Fig. 16. <sup>13</sup>C NMR spectrum of 1b.



**1d**, 4-(7-bromo-2-ethoxynaphthalen-1-yl)-1-(pyridin-2-yl)but-3-yn-2-one / (Z)-4-(7-bromo-2-ethoxynaphthalen-1-yl)-1-(pyridin-2-yl)but-1-en-3-yn-2-ol

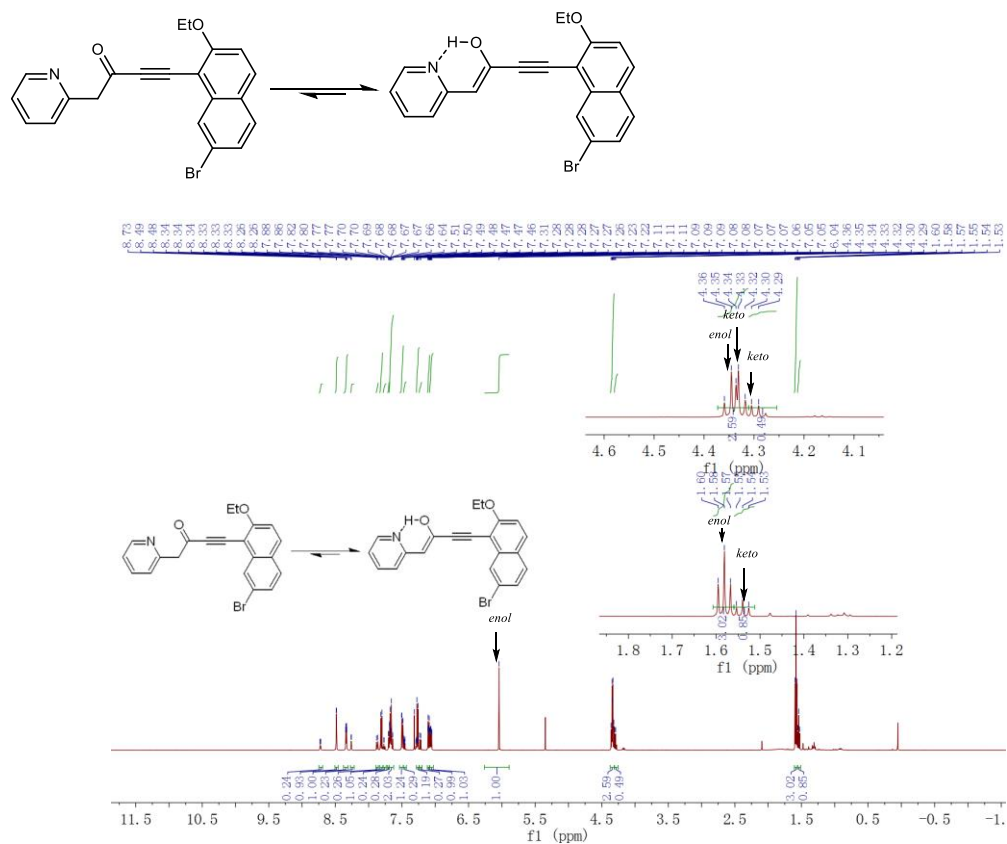

**Supplementary Fig. 19.** <sup>1</sup>H NMR spectrum of **1d**.

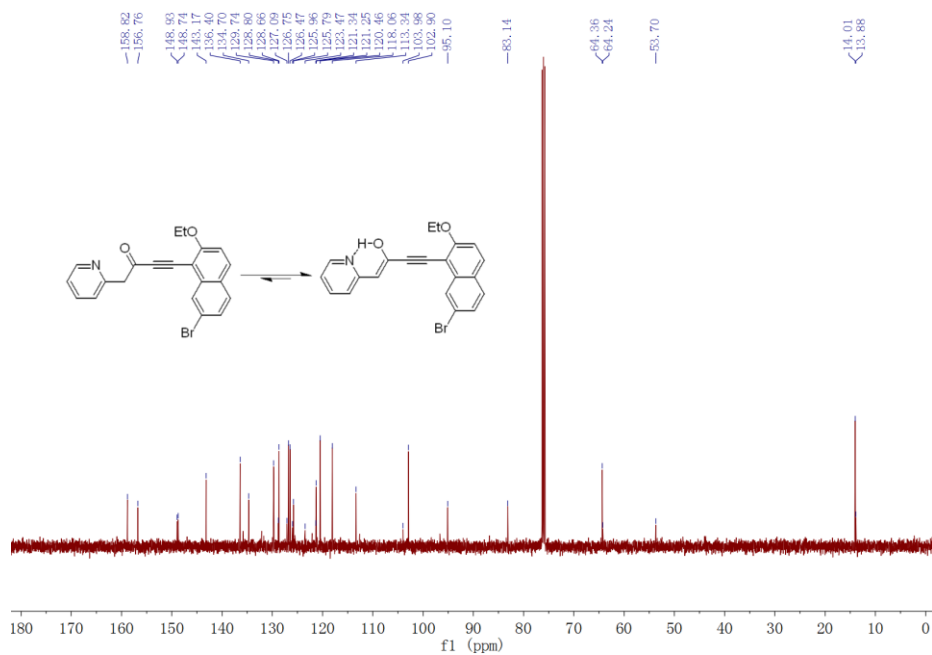

**Supplementary Fig. 20.** <sup>13</sup>C NMR spectrum of **1d**.

**1e**, 4-(2-ethoxy-7-phenylnaphthalen-1-yl)-1-(pyridin-2-yl)but-3-yn-2-one / (Z)-4-(2-ethoxy-7-phenylnaphthalen-1-yl)-1-(pyridin-2-yl)but-1-en-3-yn-2-ol

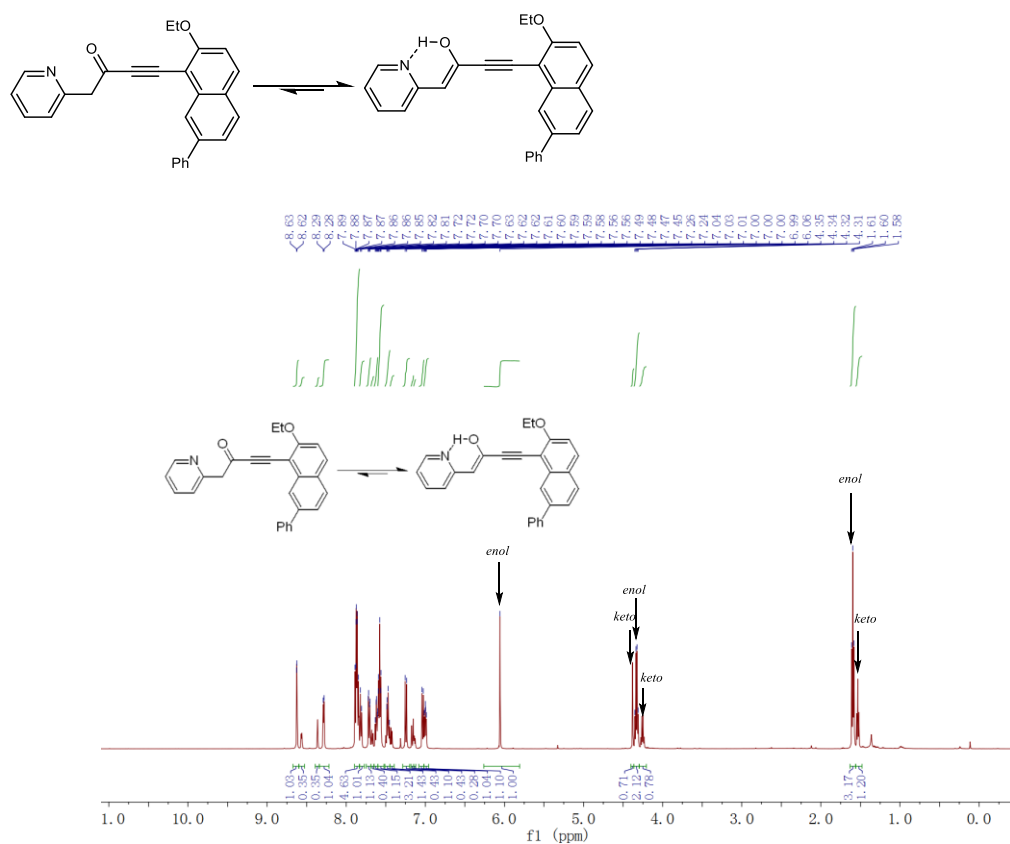

Supplementary Fig. 21. <sup>1</sup>H NMR spectrum of 1e.

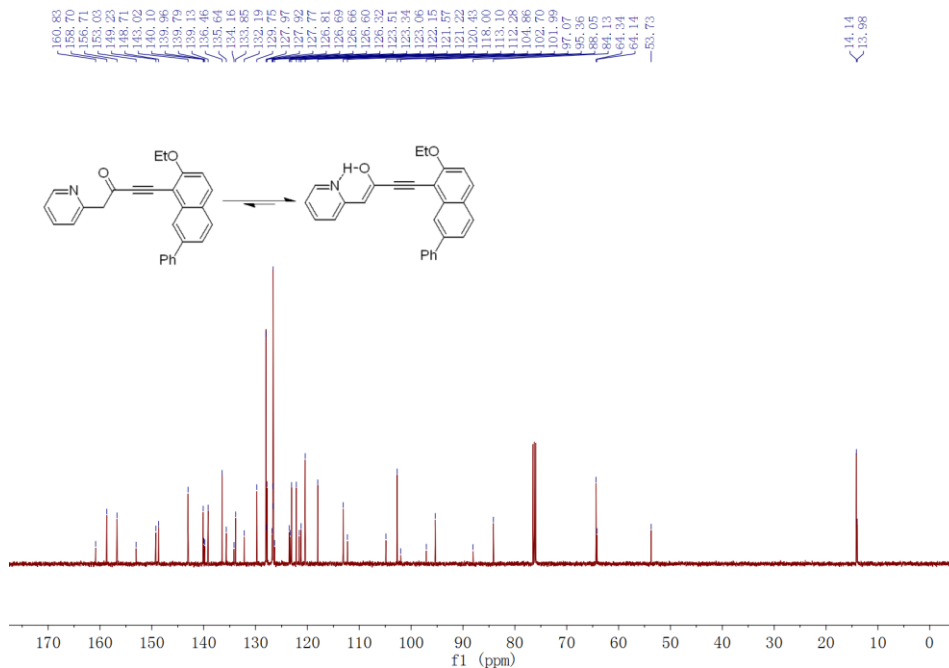

Supplementary Fig. 22. <sup>13</sup>C NMR spectrum of 1e.

**1f**, 4-(2-ethoxy-7-(phenylethynyl)naphthalen-1-yl)-1-(pyridin-2-yl)but-3-yn-2-one / (Z)-4-(2-ethoxy-7-(phenylethynyl)naphthalen-1-yl)-1-(pyridin-2-yl)but-1-en-3-yn-2-ol

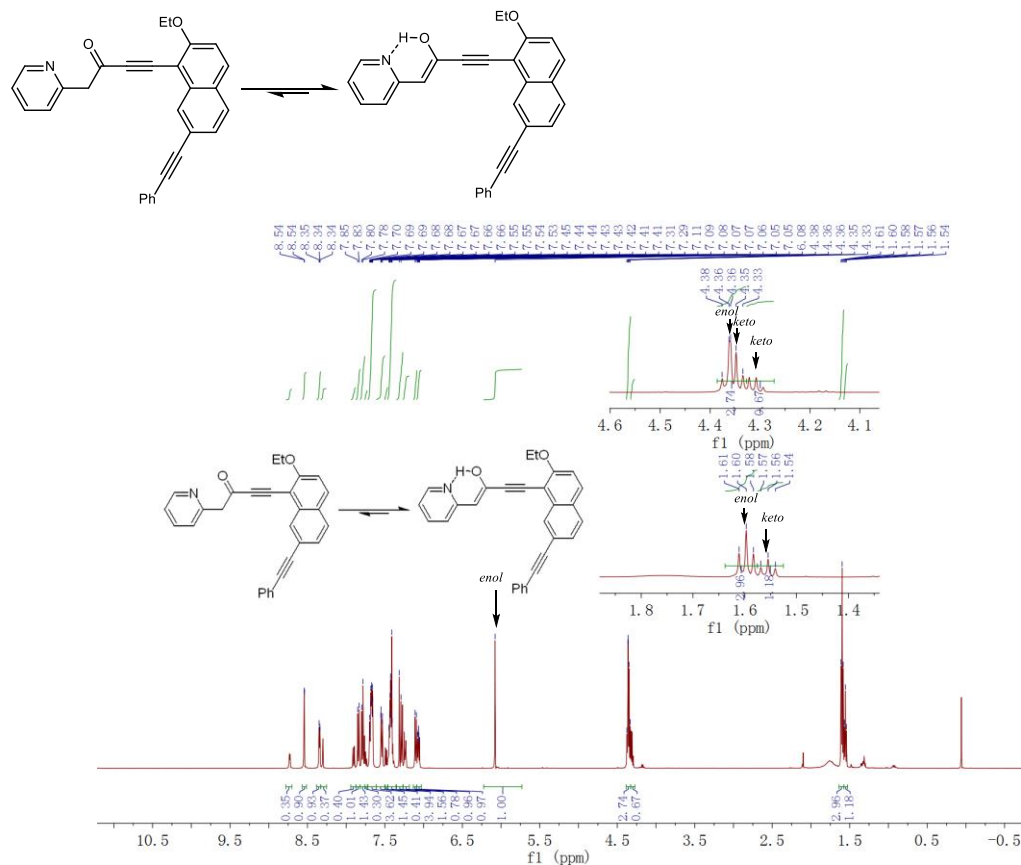

Supplementary Fig. 23.  $^1\text{H}$  NMR spectrum of **1f**.

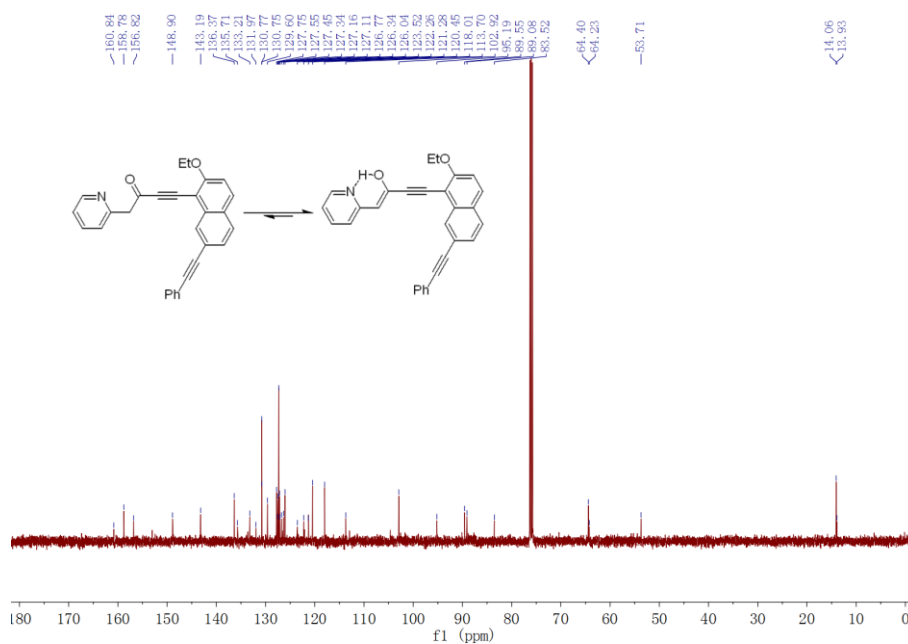

Supplementary Fig. 24.  $^{13}\text{C}$  NMR spectrum of **1f**.

**1g**, 4-(2-((4-methoxybenzyl)oxy)naphthalen-1-yl)-1-(pyridin-2-yl)but-3-yn-2-one / (Z)-4-(2-((4-methoxybenzyl)oxy)naphthalen-1-yl)-1-(pyridin-2-yl)but-1-en-3-yn-2-ol.

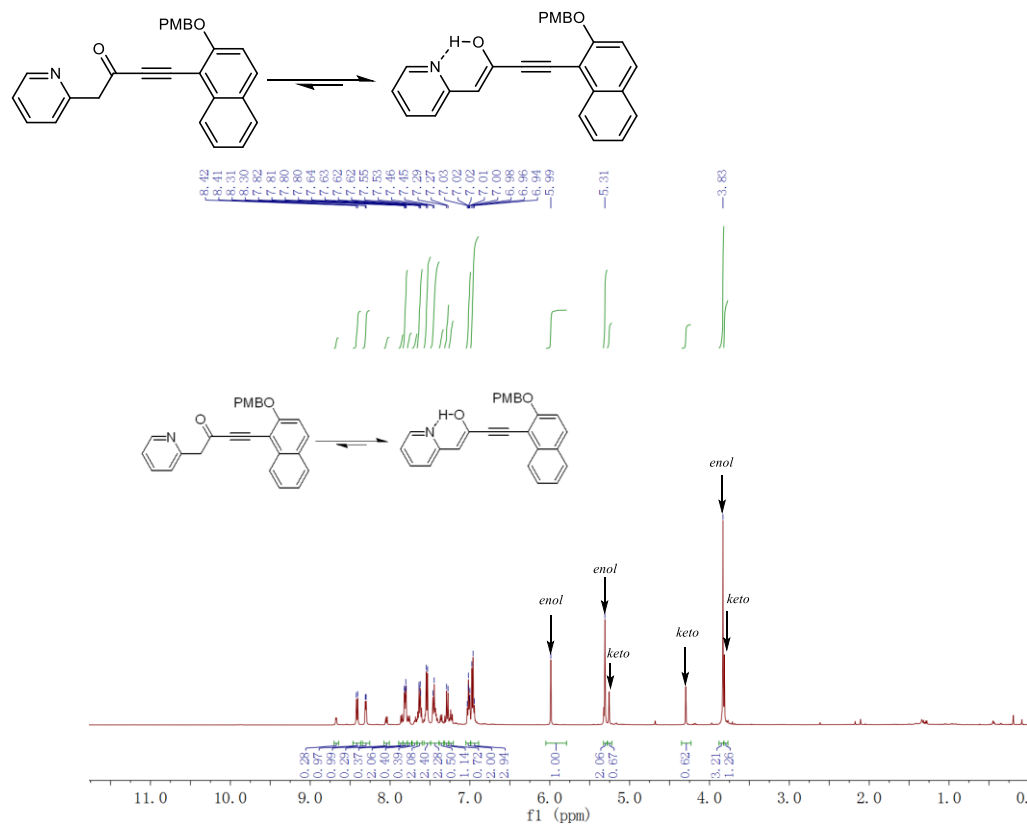

**Supplementary Fig. 25. <sup>1</sup>H NMR spectrum of 1g.**

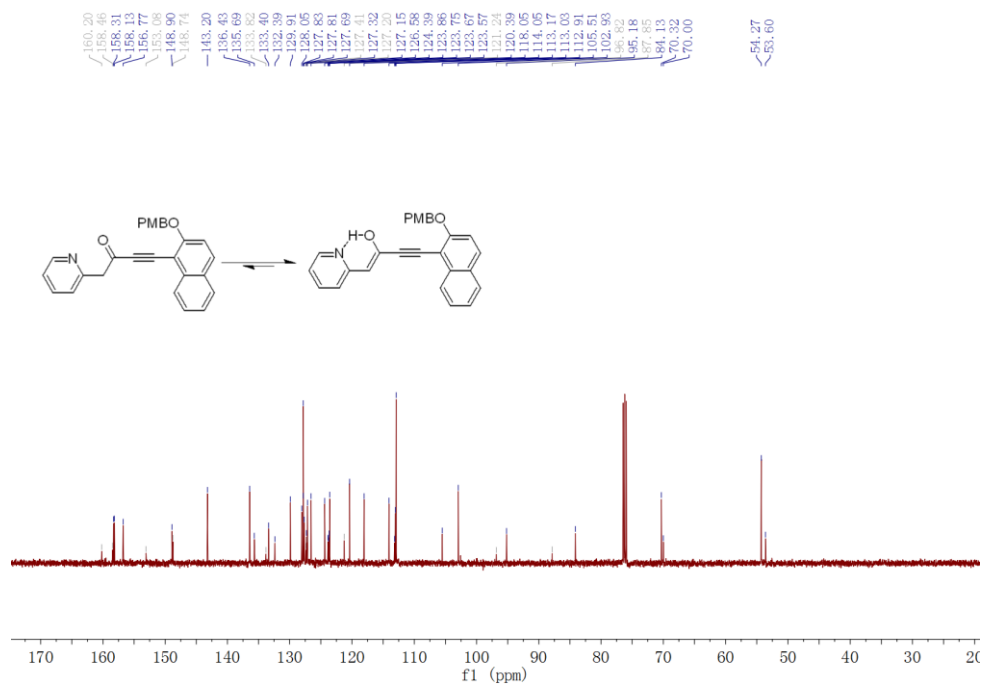

**Supplementary Fig. 26. <sup>13</sup>C NMR spectrum of 1g.**

**1h**, 4-(2-(dimethylamino)naphthalen-1-yl)-1-(pyridin-2-yl)but-3-yn-2-one / (Z)-4-(2-(dimethylamino)naphthalen-1-yl)-1-(pyridin-2-yl)but-1-en-3-yn-2-ol

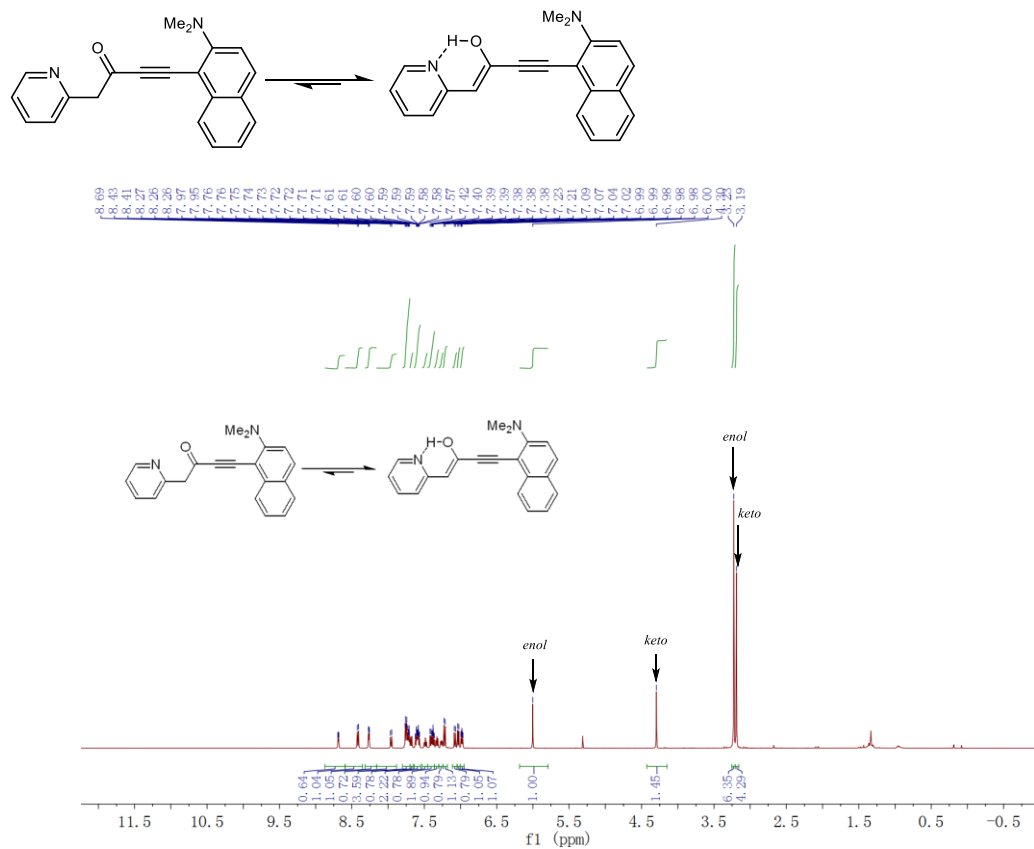

Supplementary Fig. 27. <sup>1</sup>H NMR spectrum of 1h.

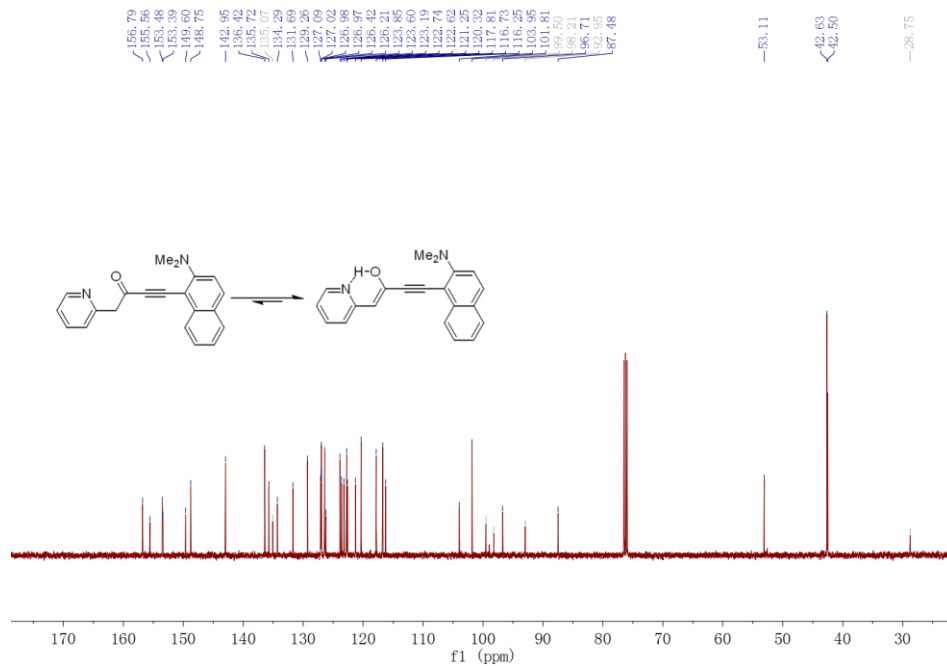

Supplementary Fig. 28. <sup>13</sup>C NMR spectrum of 1h.

**1i**, 4-(2-(dibenzylamino)naphthalen-1-yl)-1-(pyridin-2-yl)but-3-yn-2-one / (Z)-4-(2-(dibenzylamino)naphthalen-1-yl)-1-(pyridin-2-yl)but-1-en-3-yn-2-ol

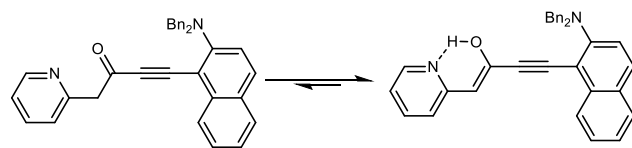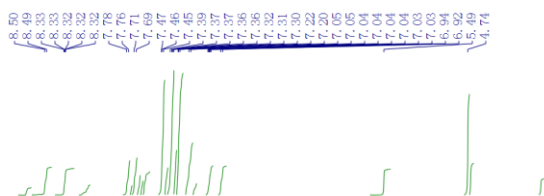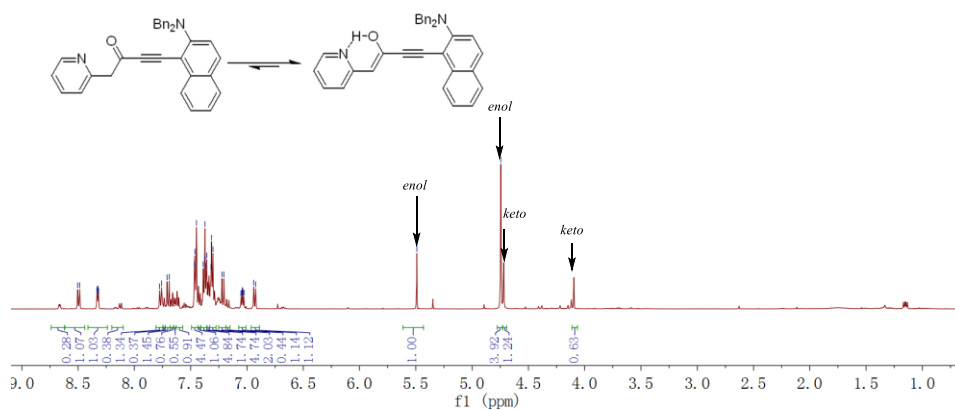

**Supplementary Fig. 29.**  $^1\text{H}$  NMR spectrum of **1i**.

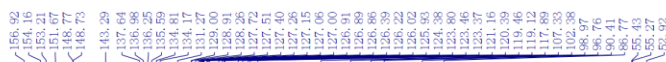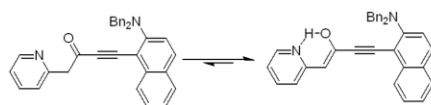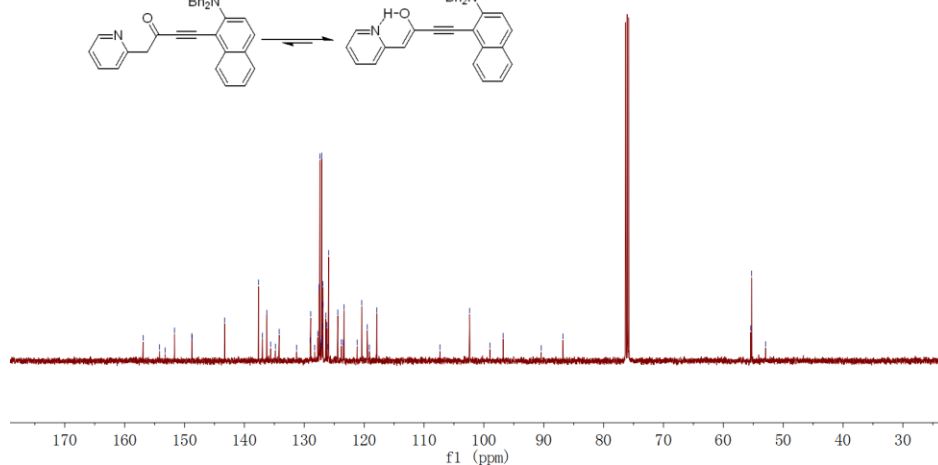

**Supplementary Fig. 30.**  $^{13}\text{C}$  NMR spectrum of **1i**.



**1j**, 4-(2-methylnaphthalen-1-yl)-1-(pyridin-2-yl)but-3-yn-2-one / (Z)-4-(2-methylnaphthalen-1-yl)-1-(pyridin-2-yl)but-1-en-3-yn-2-ol

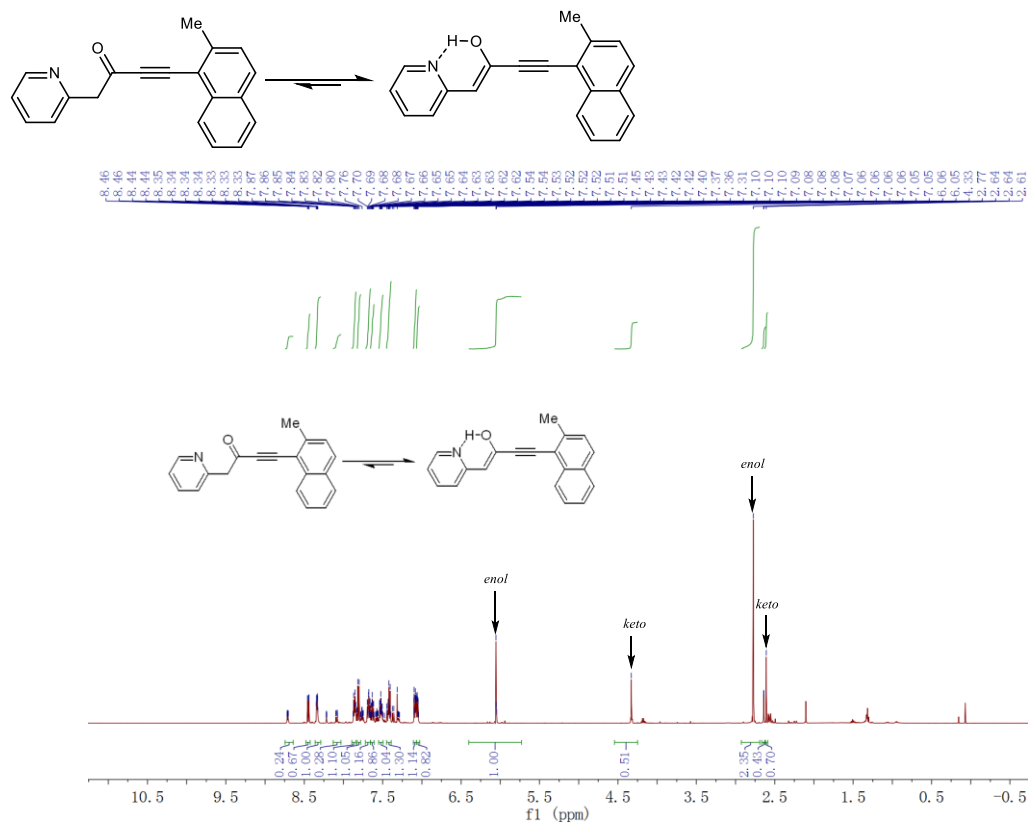

Supplementary Fig. 31.  $^1\text{H}$  NMR spectrum of **1j**.

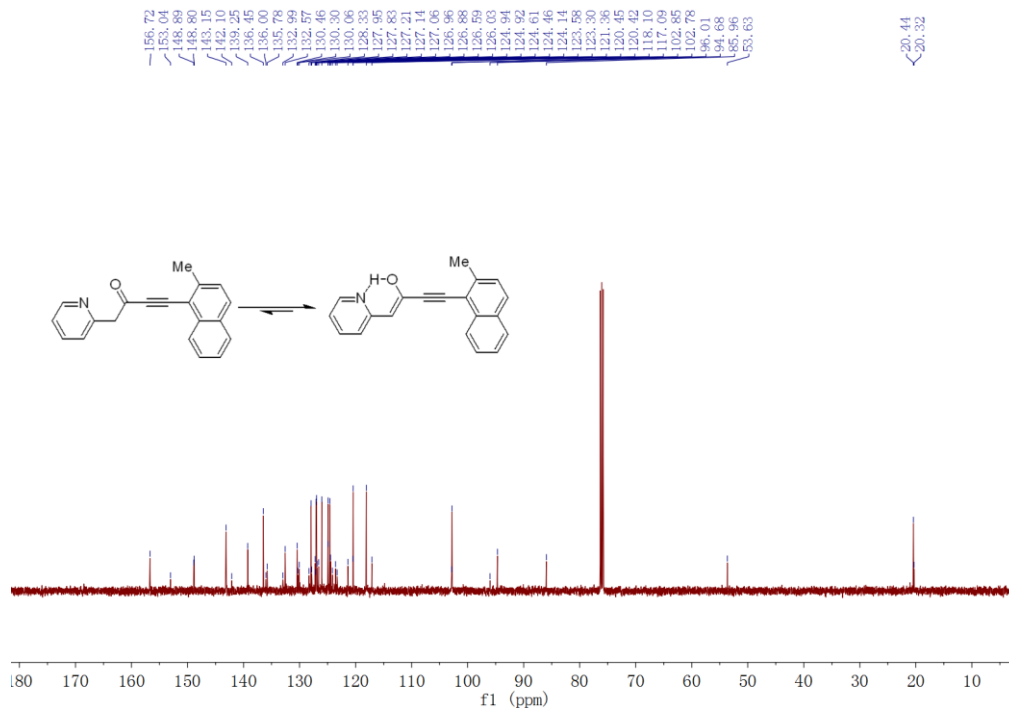

Supplementary Fig. 32.  $^{13}\text{C}$  NMR spectrum of **1j**.

**1k**, 4-(2-ethylnaphthalen-1-yl)-1-(pyridin-2-yl)but-3-yn-2-one / (Z)-4-(2-ethylnaphthalen-1-yl)-1-(pyridin-2-yl)but-1-en-3-yn-2-ol

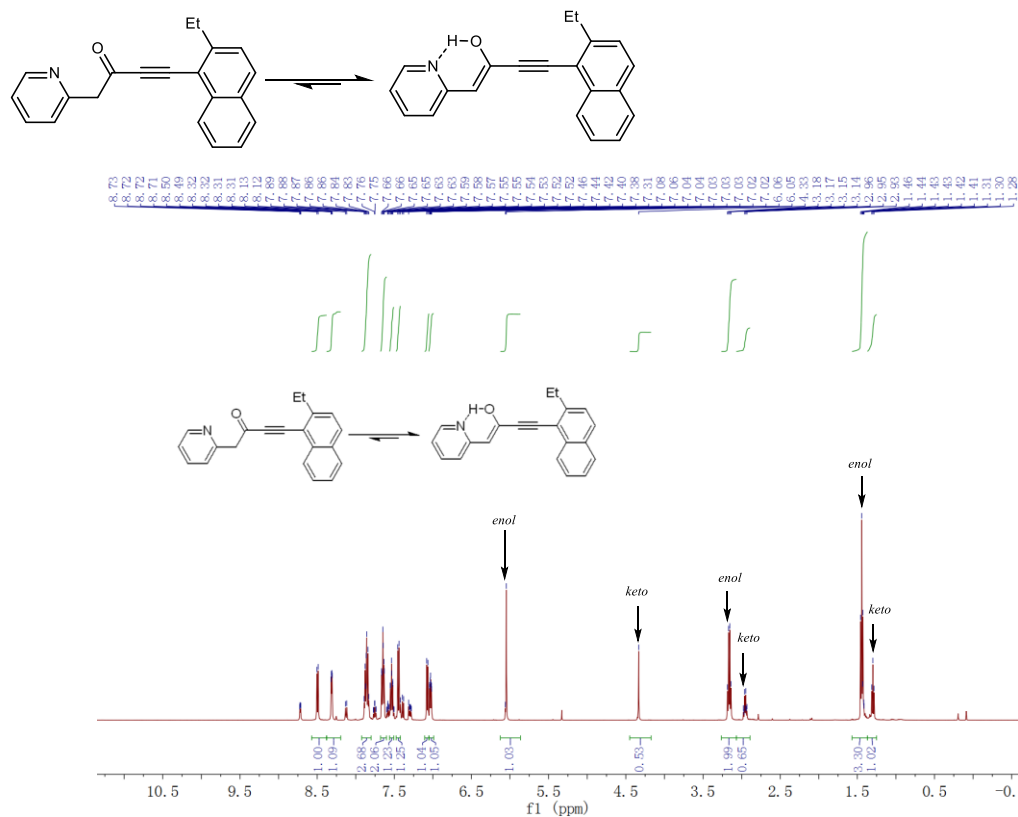

Supplementary Fig. 33. <sup>1</sup>H NMR spectrum of 1k.

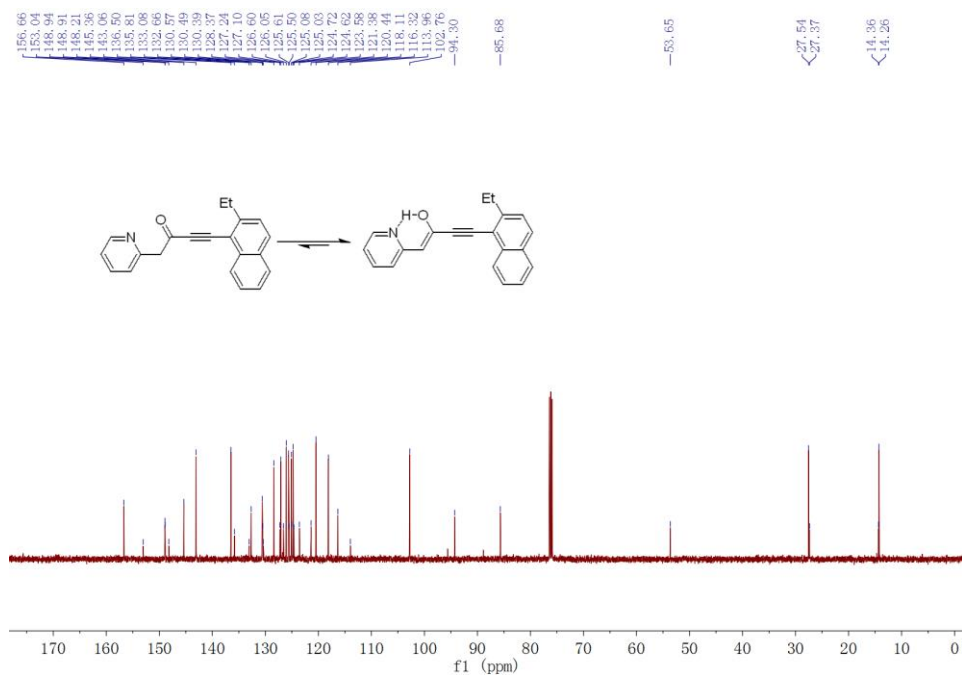

Supplementary Fig. 34. <sup>13</sup>C NMR spectrum of 1k.



**1m**, 4-(2-isopropyl-naphthalen-1-yl)-1-(pyridin-2-yl)but-3-yn-2-one / (Z)-4-(2-isopropyl-naphthalen-1-yl)-1-(pyridin-2-yl)but-1-en-3-yn-2-ol

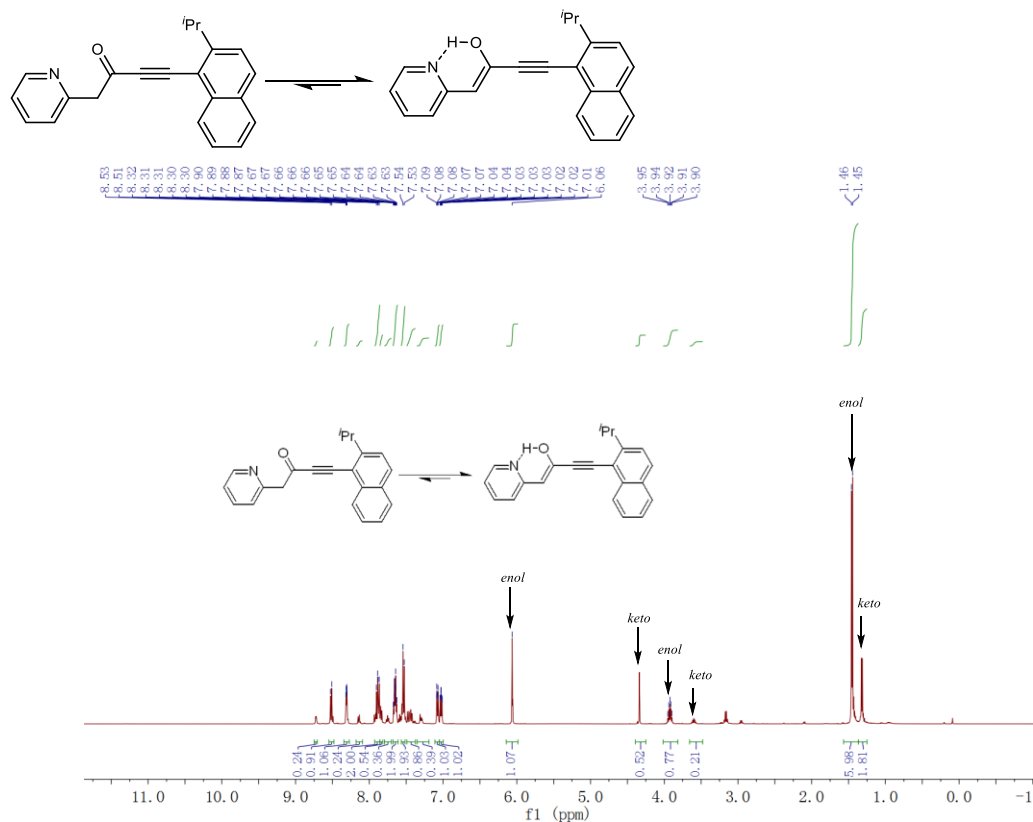

**Supplementary Fig. 37. <sup>1</sup>H NMR spectrum of 1m.**

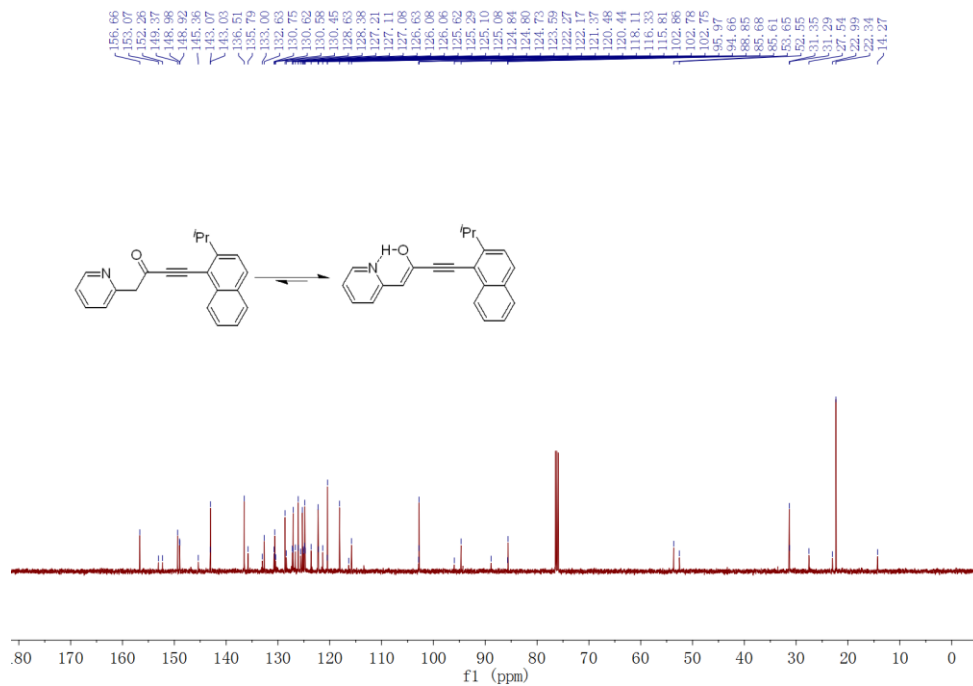

**Supplementary Fig. 38. <sup>13</sup>C NMR spectrum of 1m.**

**1n**, 4-(2-phenylnaphthalen-1-yl)-1-(pyridin-2-yl)but-3-yn-2-one / (Z)-4-(2-phenylnaphthalen-1-yl)-1-(pyridin-2-yl)but-1-en-3-yn-2-ol

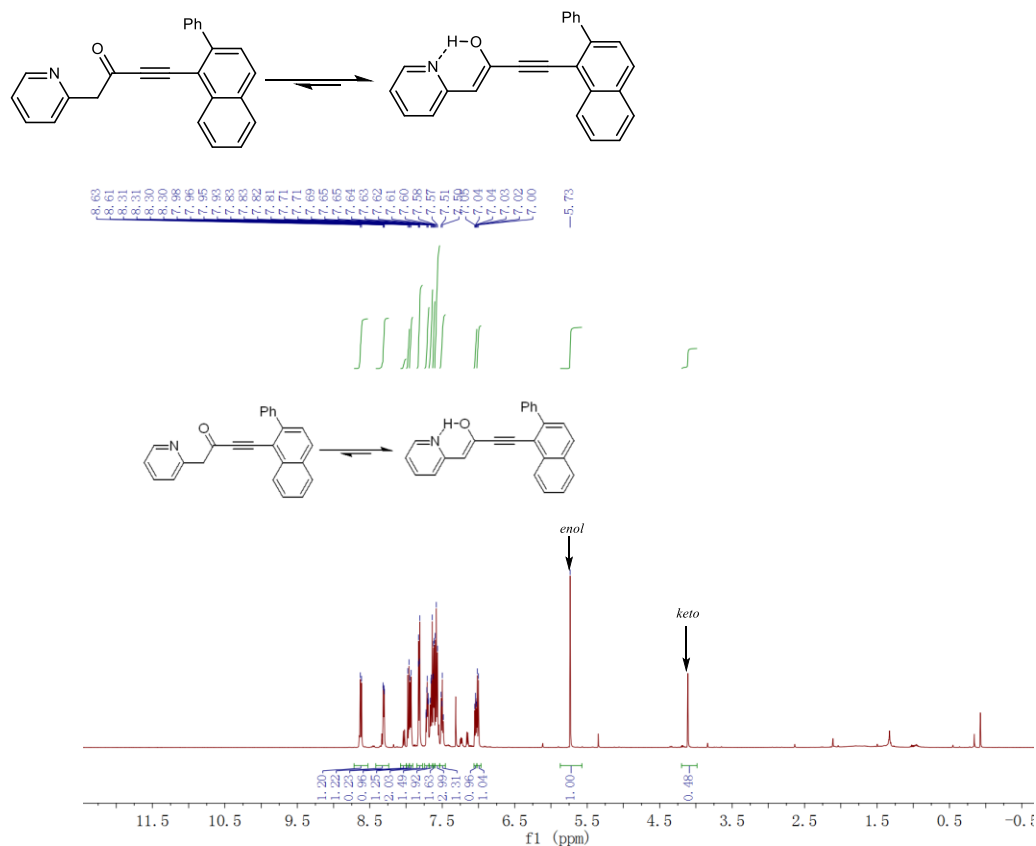

**Supplementary Fig. 39.** <sup>1</sup>H NMR spectrum of 1n.

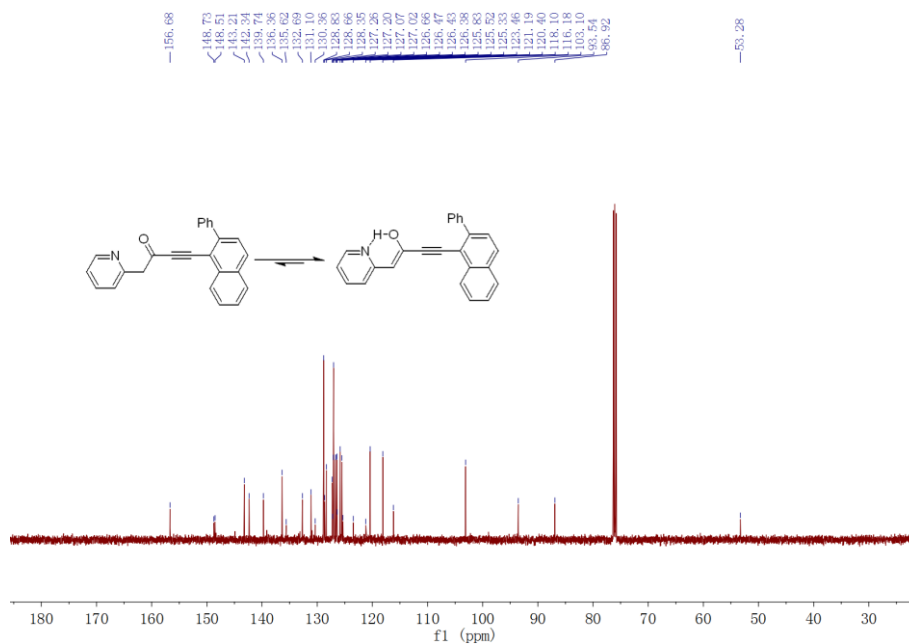

**Supplementary Fig. 40.** <sup>13</sup>C NMR spectrum of 1n.

**1o**, 4-([1,2'-binaphthalen]-1'-yl)-1-(pyridin-2-yl)but-3-yn-2-one / (Z)-4-([1,2'-binaphthalen]-1'-yl)-1-(pyridin-2-yl)but-1-en-3-yn-2-ol

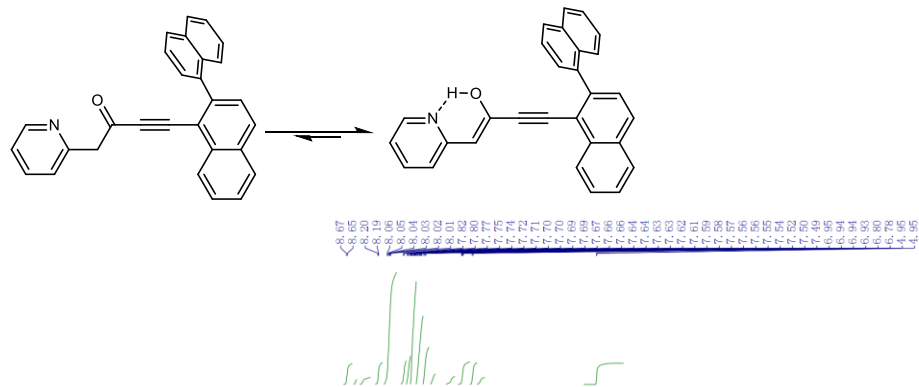

**Supplementary Fig. 41. <sup>1</sup>H NMR spectrum of 1o.**

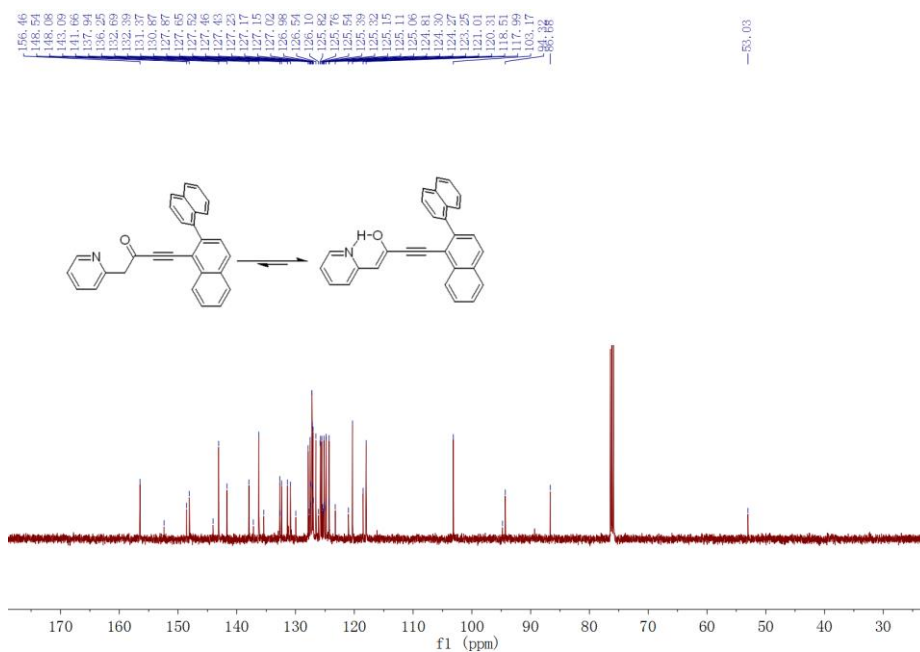

**Supplementary Fig. 42. <sup>13</sup>C NMR spectrum of 1o.**

**1p**, 4-(2-bromonaphthalen-1-yl)-1-(pyridin-2-yl)but-3-yn-2-one / (Z)-4-(2-bromonaphthalen-1-yl)-1-(pyridin-2-yl)but-1-en-3-yn-2-ol

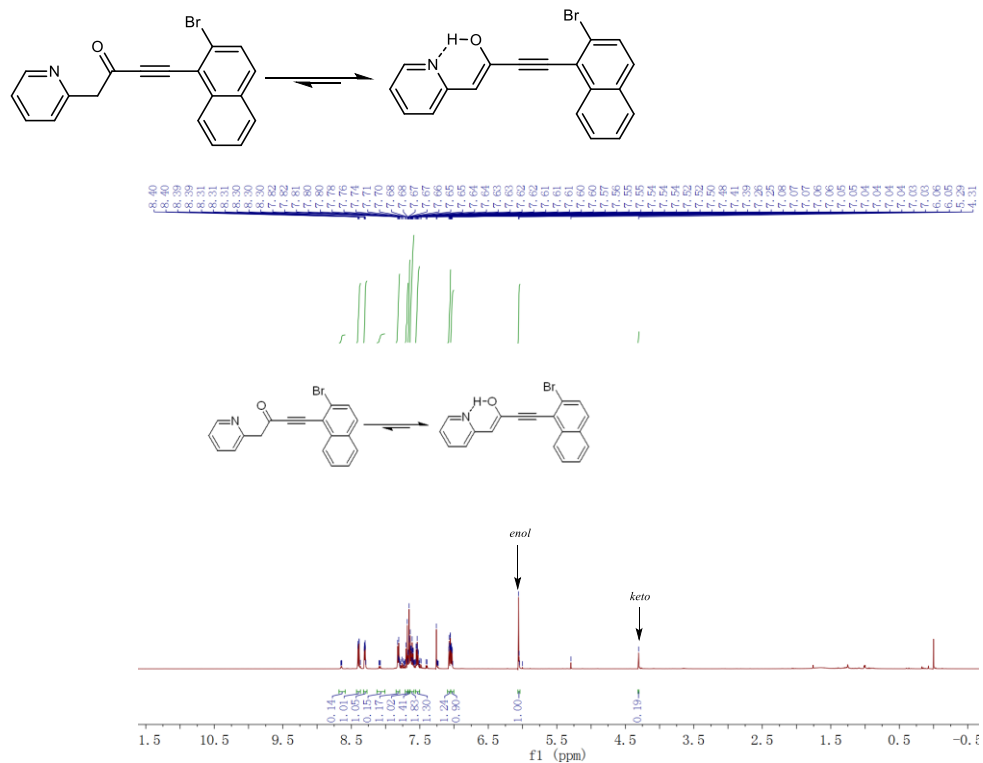

**Supplementary Fig. 43.**  $^1\text{H}$  NMR spectrum of **1p**.

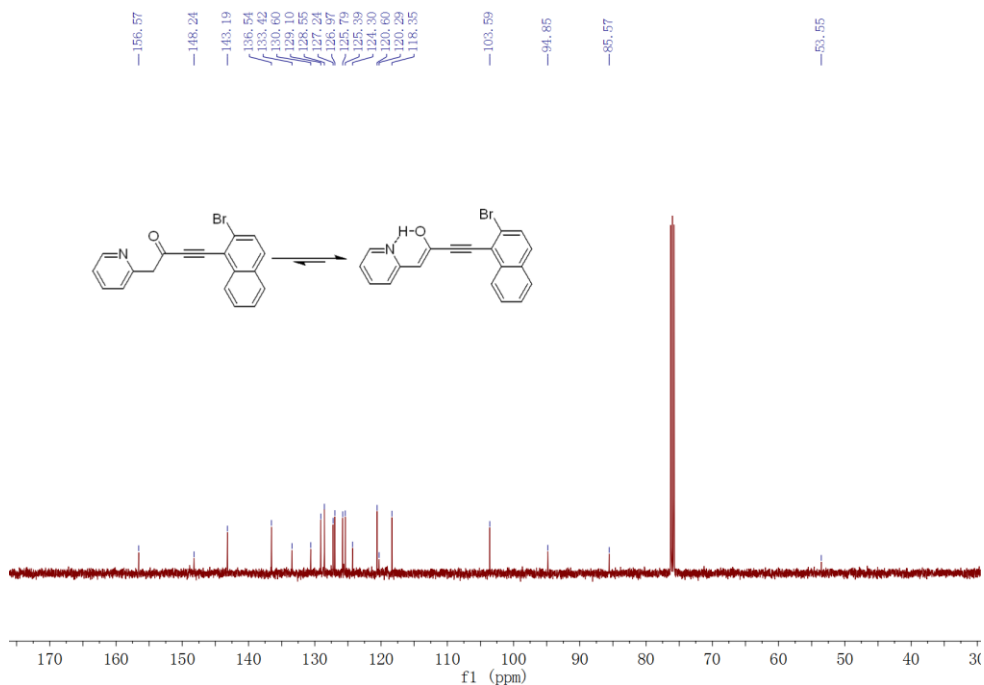

**Supplementary Fig. 44.**  $^{13}\text{C}$  NMR spectrum of **1p**.

**1q**, 4-(2-chloronaphthalen-1-yl)-1-(pyridin-2-yl)but-3-yn-2-one / (Z)-4-(2-chloronaphthalen-1-yl)-1-(pyridin-2-yl)but-1-en-3-yn-2-ol

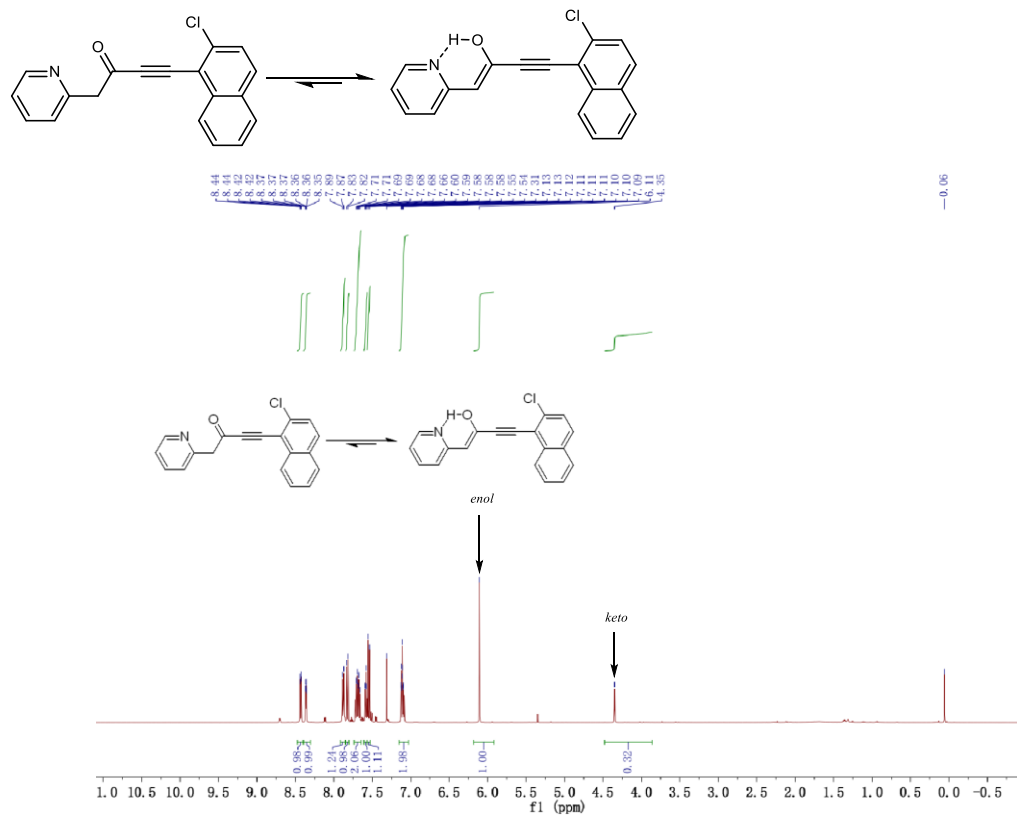

Supplementary Fig. 45. <sup>1</sup>H NMR spectrum of 1q.

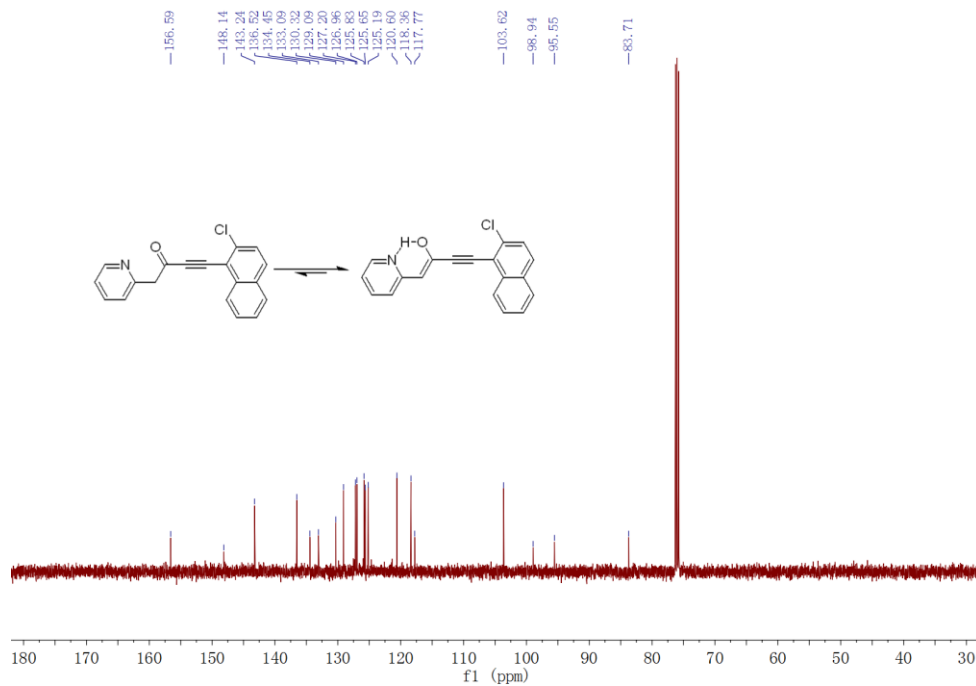

Supplementary Fig. 46. <sup>13</sup>C NMR spectrum of 1q.



**1r**, 1-(3-bromopyridin-2-yl)-4-(2-ethoxynaphthalen-1-yl)but-3-yn-2-one / (Z)-1-(3-bromopyridin-2-yl)-4-(2-ethoxynaphthalen-1-yl)but-1-en-3-yn-2-ol

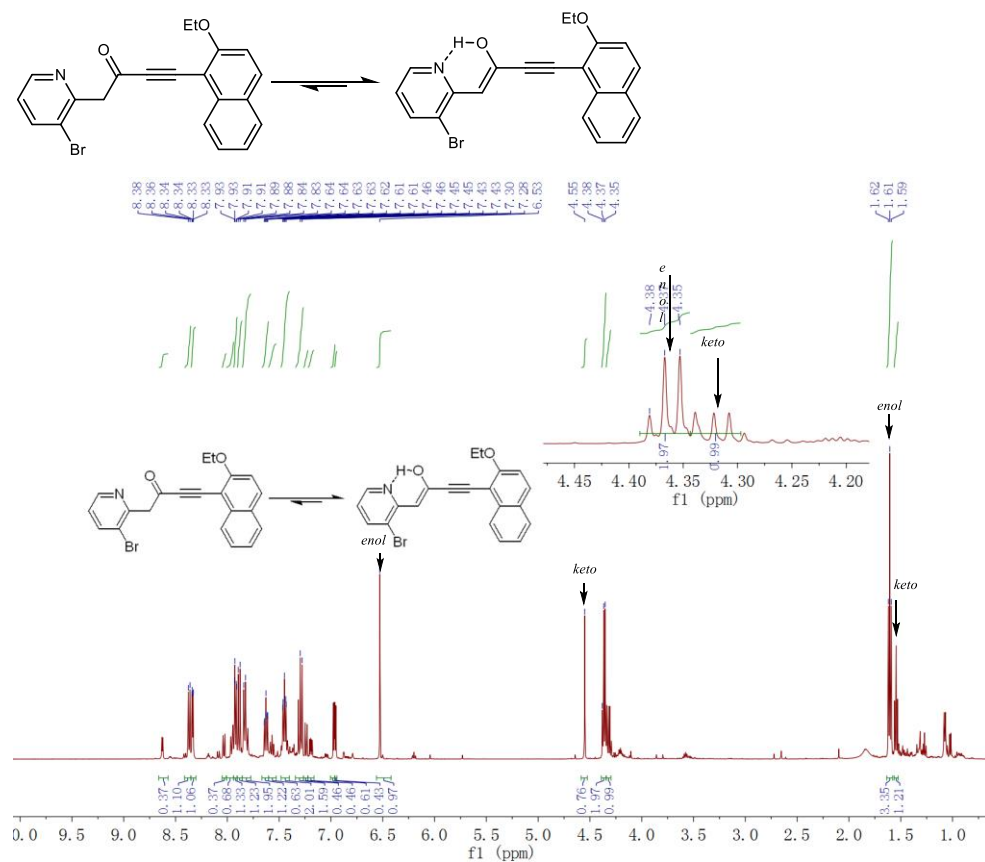

**1s**, 1-(4-bromopyridin-2-yl)-4-(2-ethoxynaphthalen-1-yl)but-3-yn-2-one / (Z)-1-(4-bromopyridin-2-yl)-4-(2-ethoxynaphthalen-1-yl)but-1-en-3-yn-2-ol

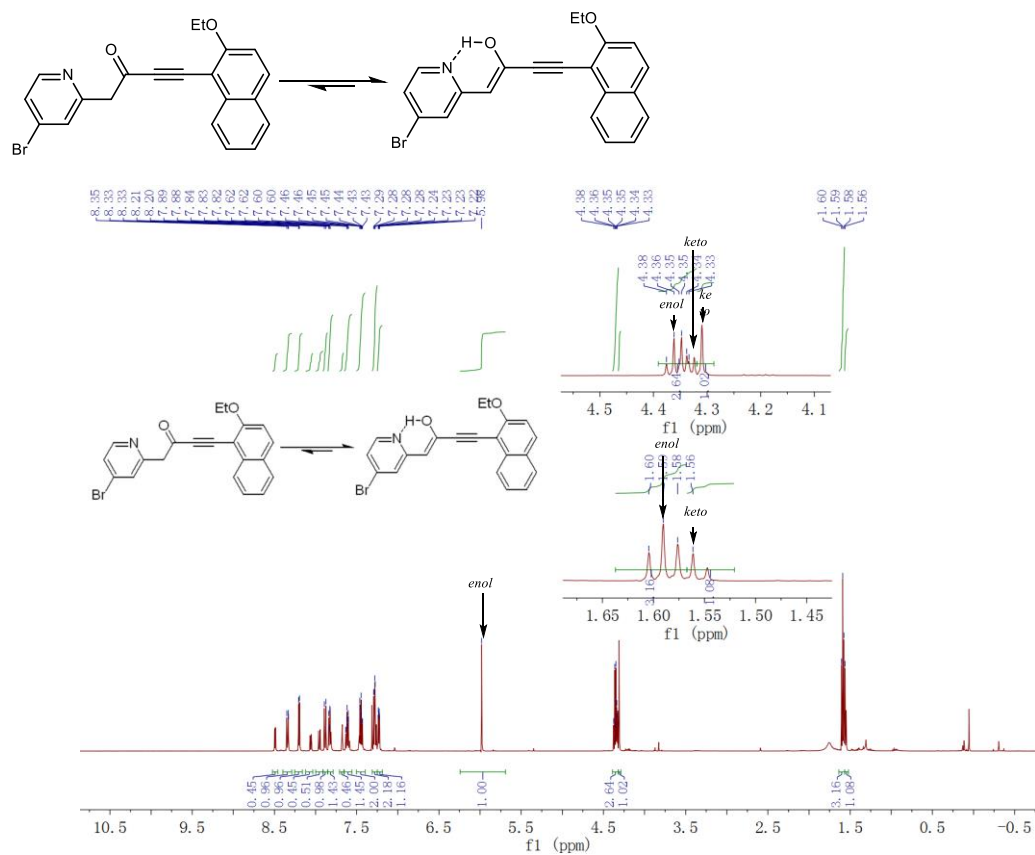

**Supplementary Fig. 49. <sup>1</sup>H NMR spectrum of 1s.**

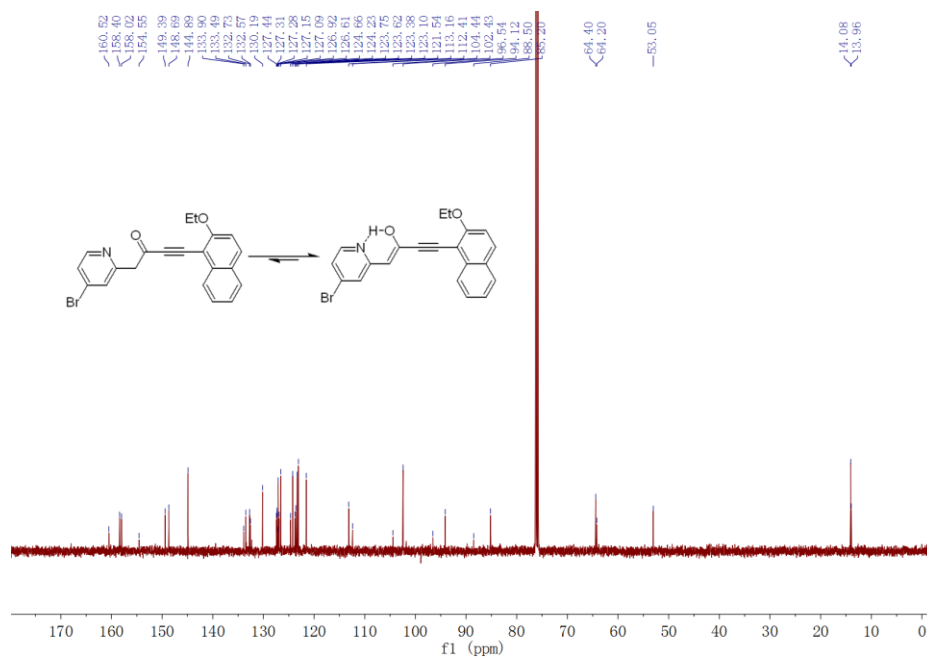

**Supplementary Fig. 50. <sup>13</sup>C NMR spectrum of 1s.**

**1t**, 1-(4-chloropyridin-2-yl)-4-(2-ethoxynaphthalen-1-yl)but-3-yn-2-one / (Z)-1-(4-chloropyridin-2-yl)-4-(2-ethoxynaphthalen-1-yl)but-1-en-3-yn-2-ol

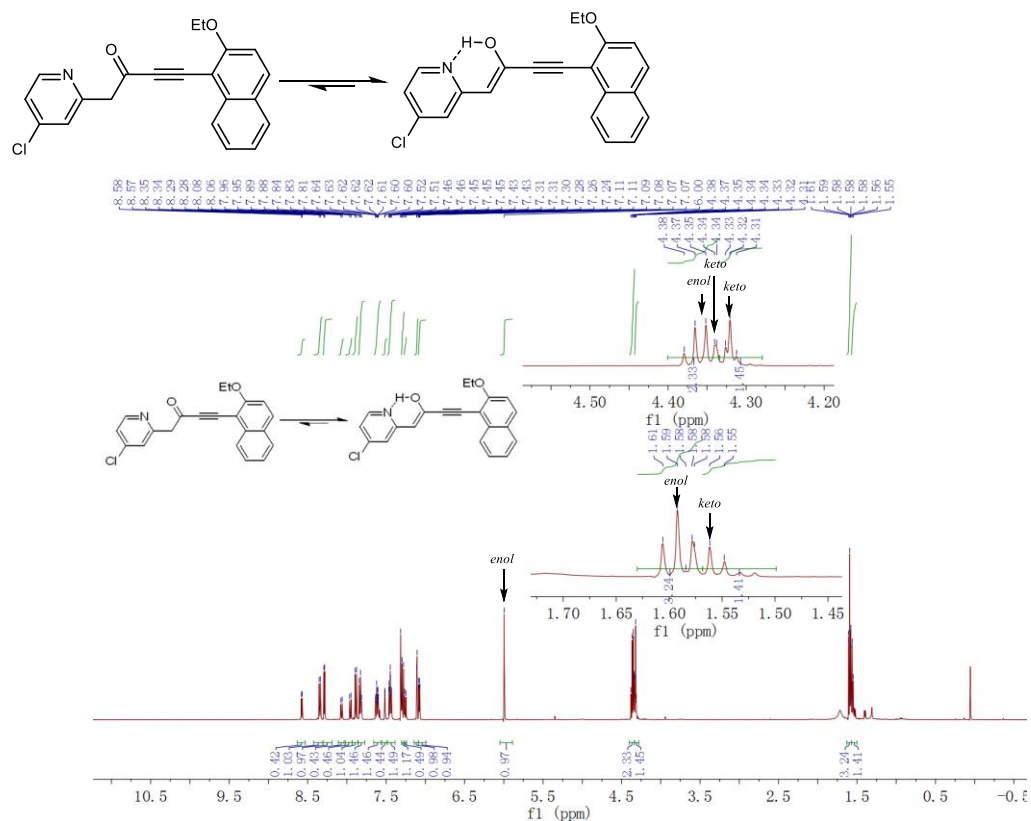

Supplementary Fig. 51. <sup>1</sup>H NMR spectrum of 1t.

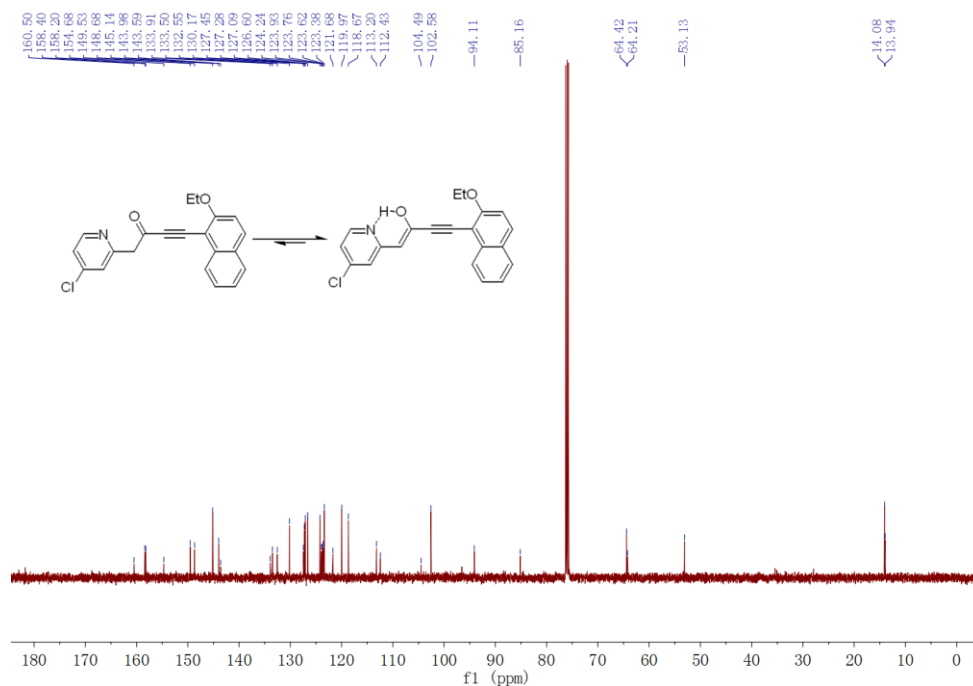

Supplementary Fig. 52. <sup>13</sup>C NMR spectrum of 1t.

**1u**, 1-(5-bromopyridin-2-yl)-4-(2-ethoxynaphthalen-1-yl)but-3-yn-2-one / (Z)-1-(5-bromopyridin-2-yl)-4-(2-ethoxynaphthalen-1-yl)but-1-en-3-yn-2-ol

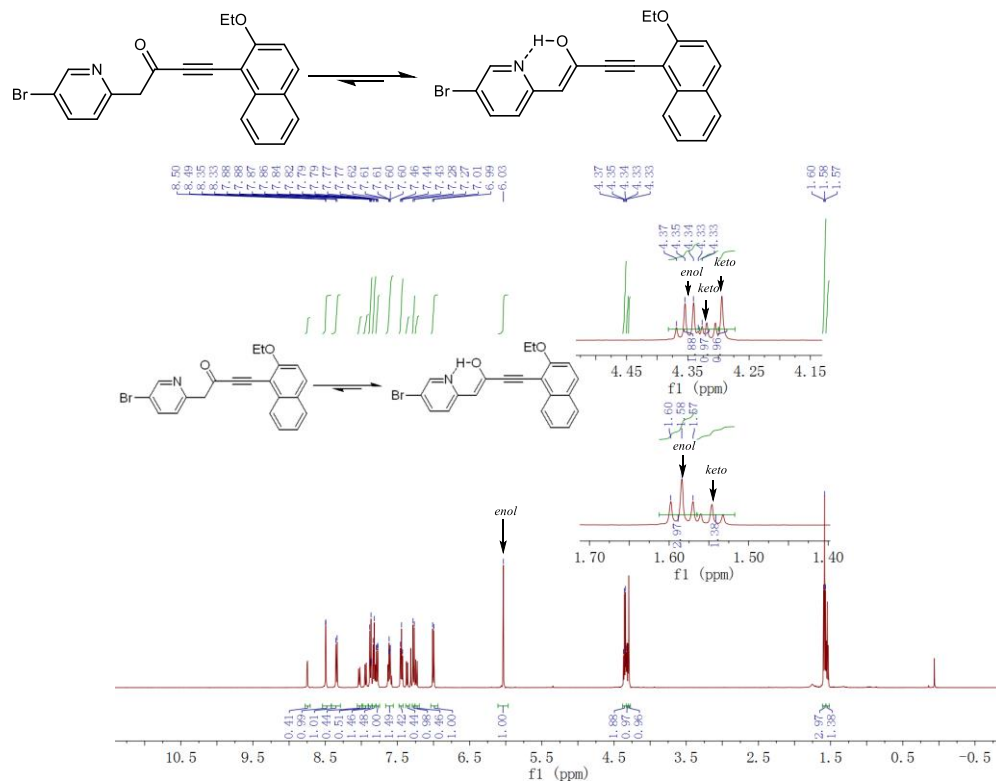

Supplementary Fig. 53. <sup>1</sup>H NMR spectrum of 1u.

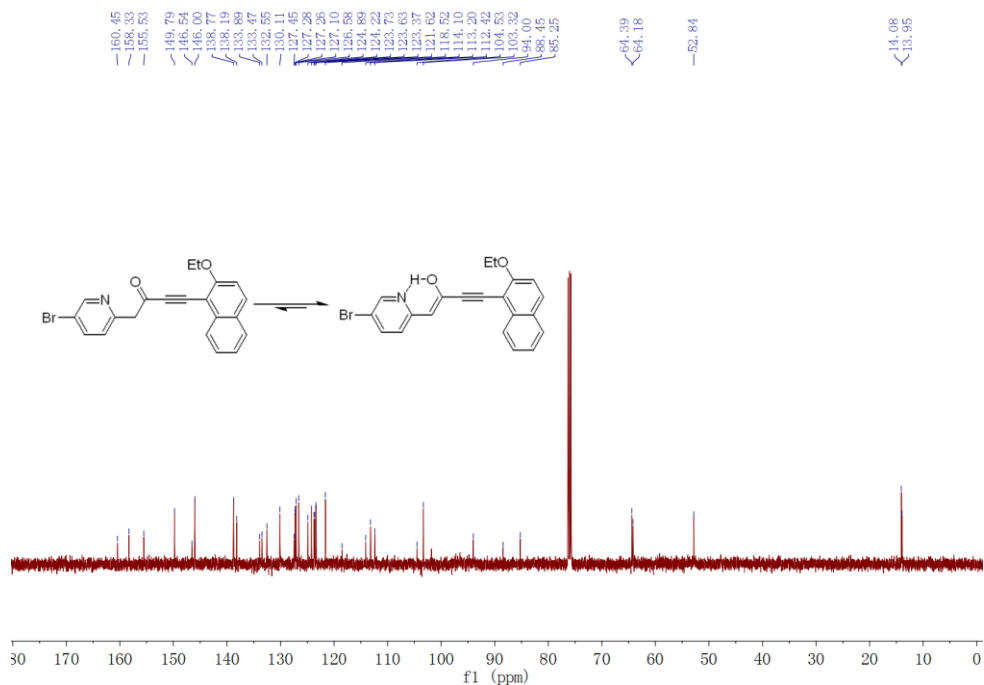

Supplementary Fig. 54. <sup>13</sup>C NMR spectrum of 1u.

**1v**, 4-(2-ethoxynaphthalen-1-yl)-1-(5-methylpyridin-2-yl)but-3-yn-2-one / (Z)-4-(2-ethoxynaphthalen-1-yl)-1-(5-methylpyridin-2-yl)but-1-en-3-yn-2-ol

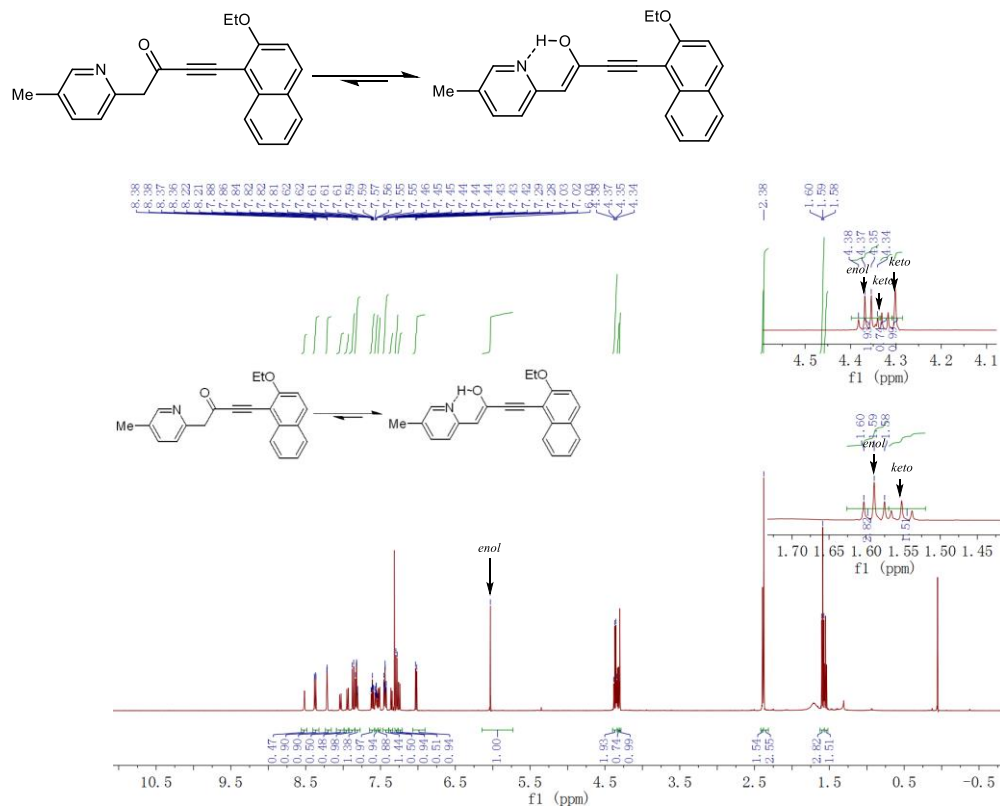

**Supplementary Fig. 55.  $^1\text{H}$  NMR spectrum of 1v.**

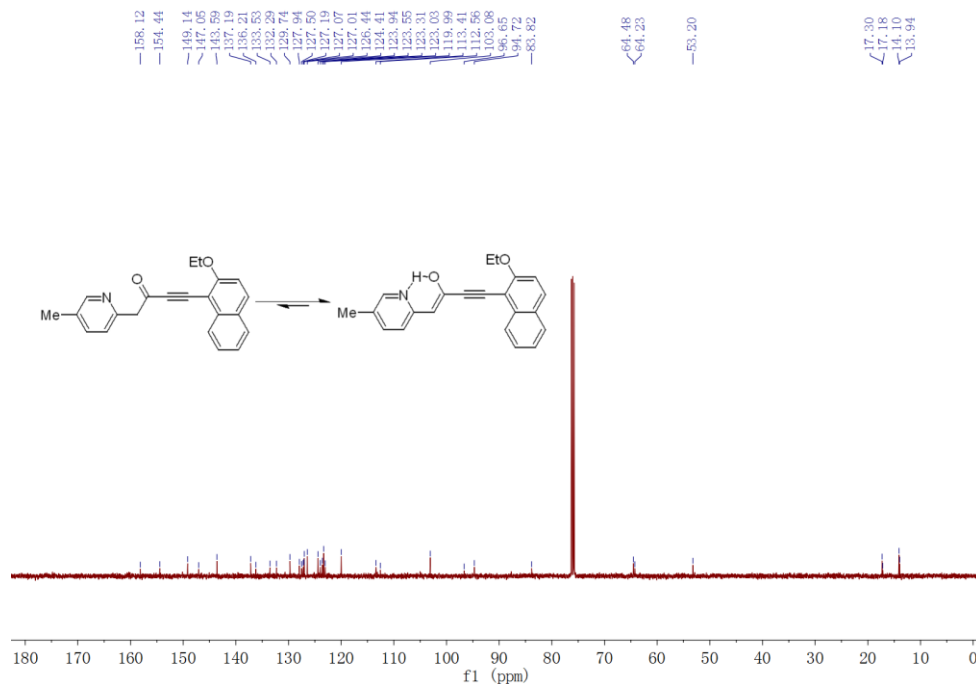

**Supplementary Fig. 56.  $^{13}\text{C}$  NMR spectrum of 1v.**

**1w**, 4-(2-ethoxynaphthalen-1-yl)-1-(pyrazin-2-yl)but-3-yn-2-one / (Z)-4-(2-ethoxynaphthalen-1-yl)-1-(pyrazin-2-yl)but-1-en-3-yn-2-ol

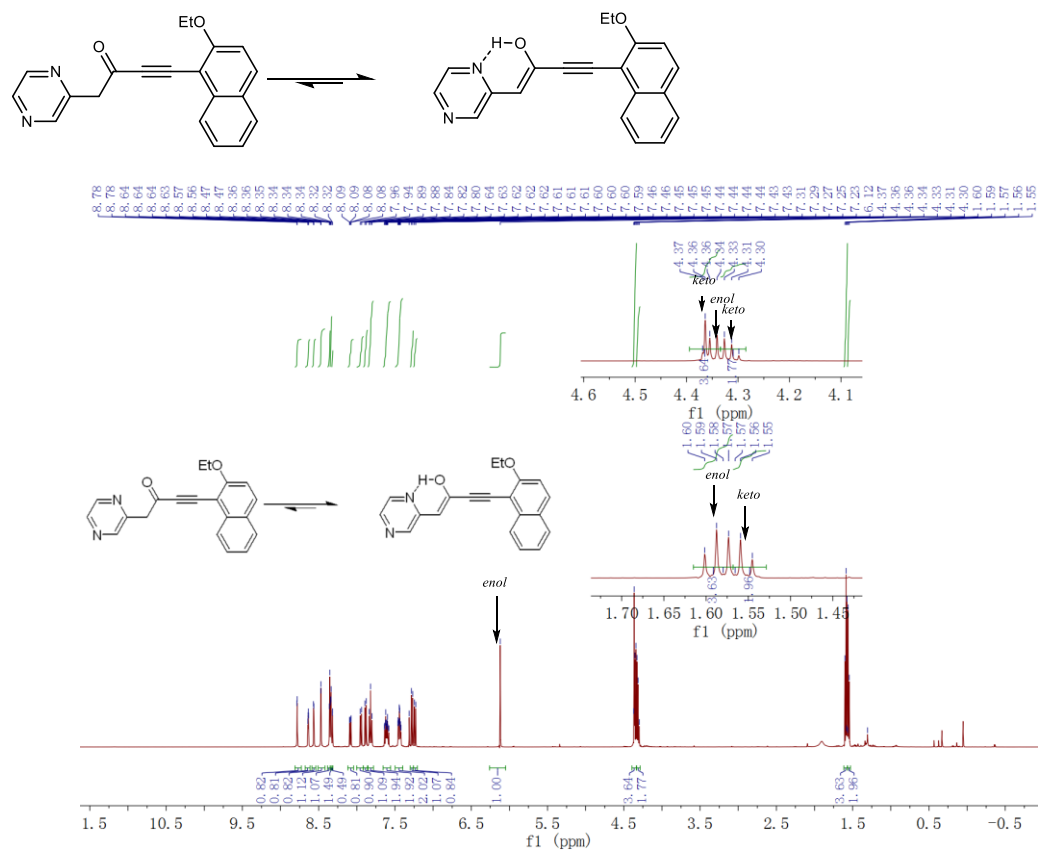

Supplementary Fig. 57. <sup>1</sup>H NMR spectrum of 1w.

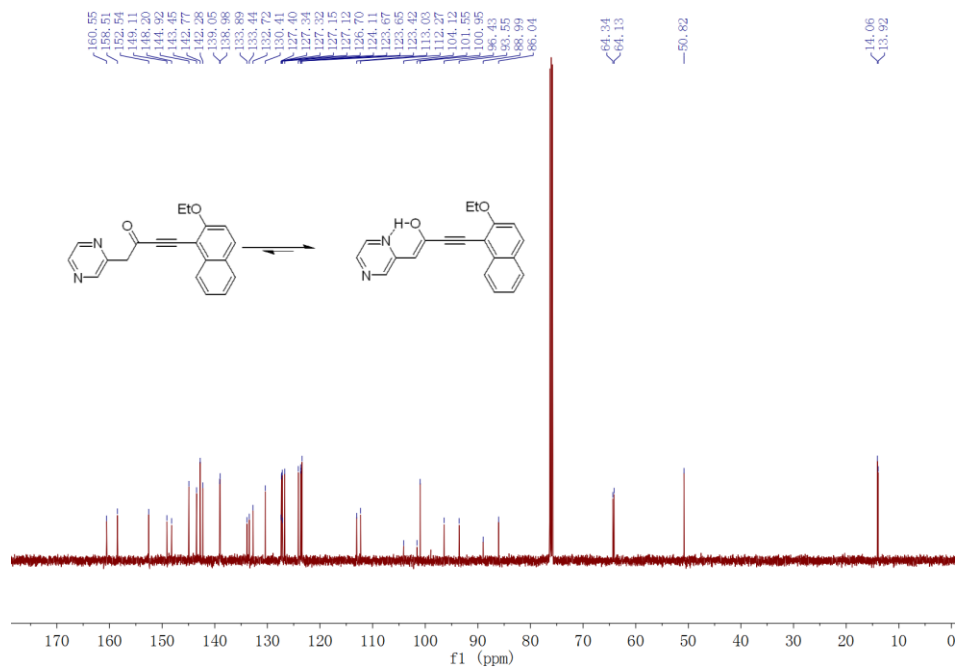

Supplementary Fig. 58. <sup>13</sup>C NMR spectrum of 1w.

**1x**, 4-(2-ethoxynaphthalen-1-yl)-1-(5-(4-((((3*aS*,5*aR*,8*aR*,8*bS*)-2,2,7,7-tetramethyltetrahydro-3*aH*-bis([1,3]dioxolo)[4,5-*b*:4',5'-*d*]pyran-3*a*-yl)methoxy)methyl)phenyl)pyridin-2-yl)but-3-yn-2-one / (Z)-4-(2-ethoxynaphthalen-1-yl)-1-(5-(4-((((3*aS*,5*aR*,8*aR*,8*bS*)-2,2,7,7-tetramethyltetrahydro-3*aH*-bis([1,3]dioxolo)[4,5-*b*:4',5'-*d*]pyran-3*a*-yl)methoxy)methyl)phenyl)pyridin-2-yl)but-1-en-3-yn-2-ol

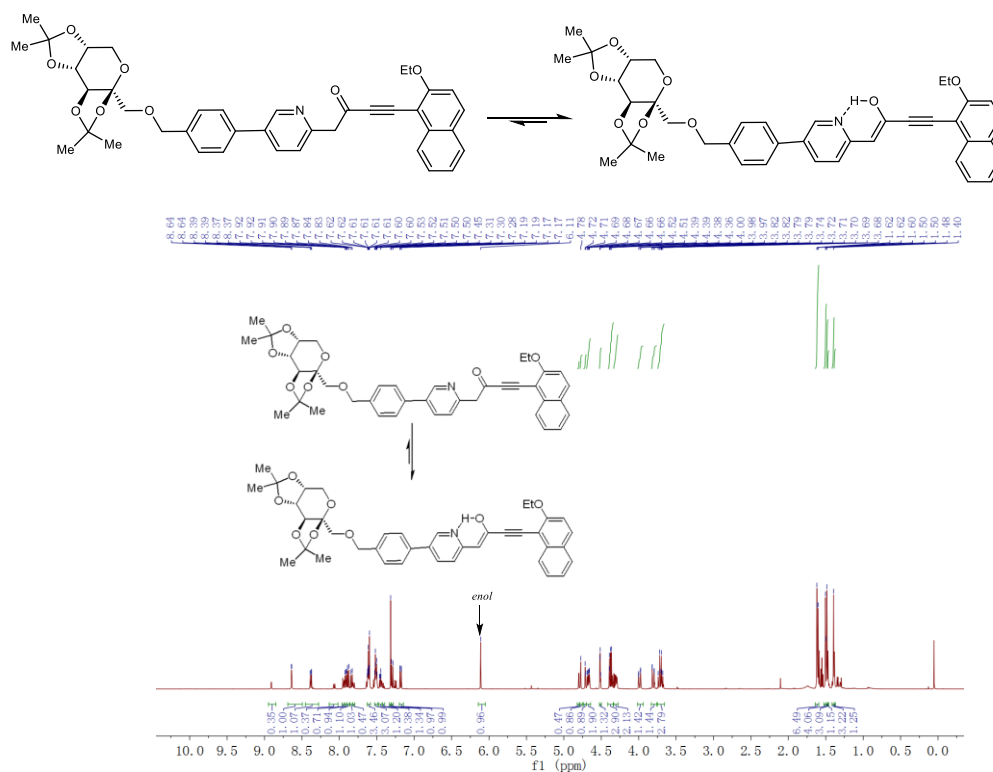

Supplementary Fig. 59. <sup>1</sup>H NMR spectrum of 1x.

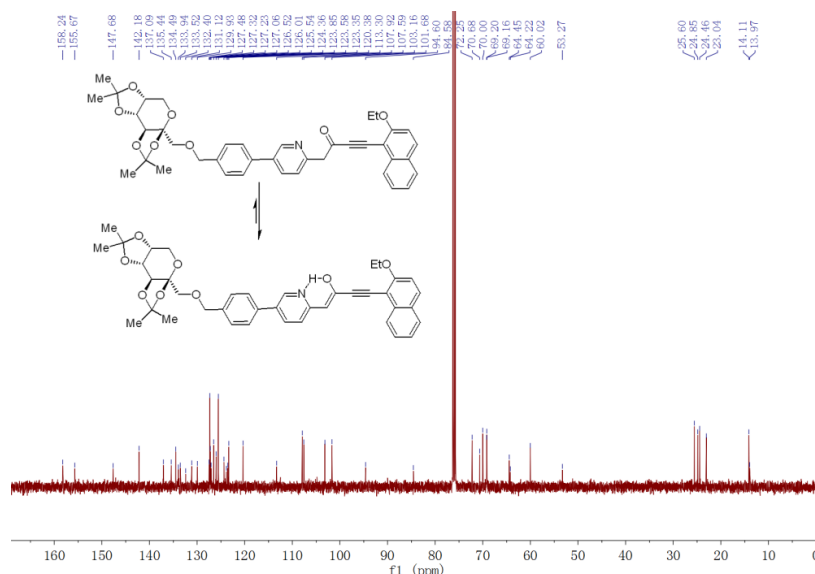

Supplementary Fig. 60. <sup>13</sup>C NMR spectrum of 1x.





**1z**, 4-(2-ethoxynaphthalen-1-yl)-1-(5-(4-((((1*R*,2*S*,5*R*)-2-isopropyl-5-methylcyclohexyl)oxy)methyl)phenyl)pyridin-2-yl)but-3-yn-2-one / (Z)-4-(2-ethoxynaphthalen-1-yl)-1-(5-(4-((((1*R*,2*S*,5*R*)-2-isopropyl-5-methylcyclohexyl)oxy)-methyl)phenyl)pyridin-2-yl)but-1-en-3-yn-2-ol

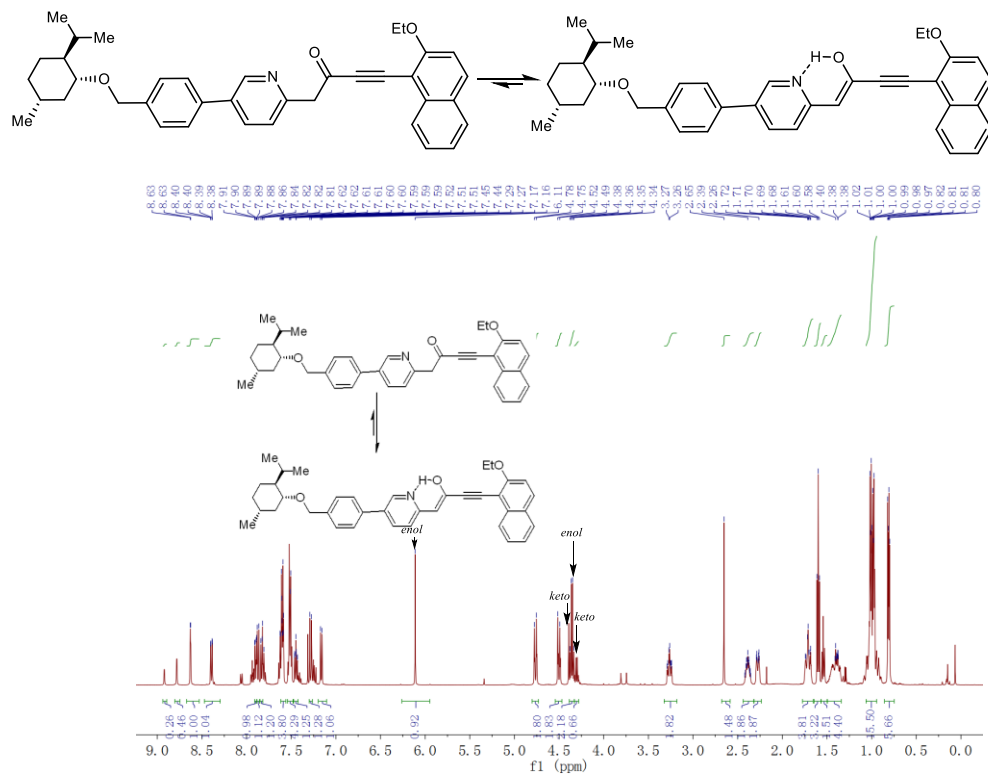

**Supplementary Fig. 63. <sup>1</sup>H NMR spectrum of 1z.**

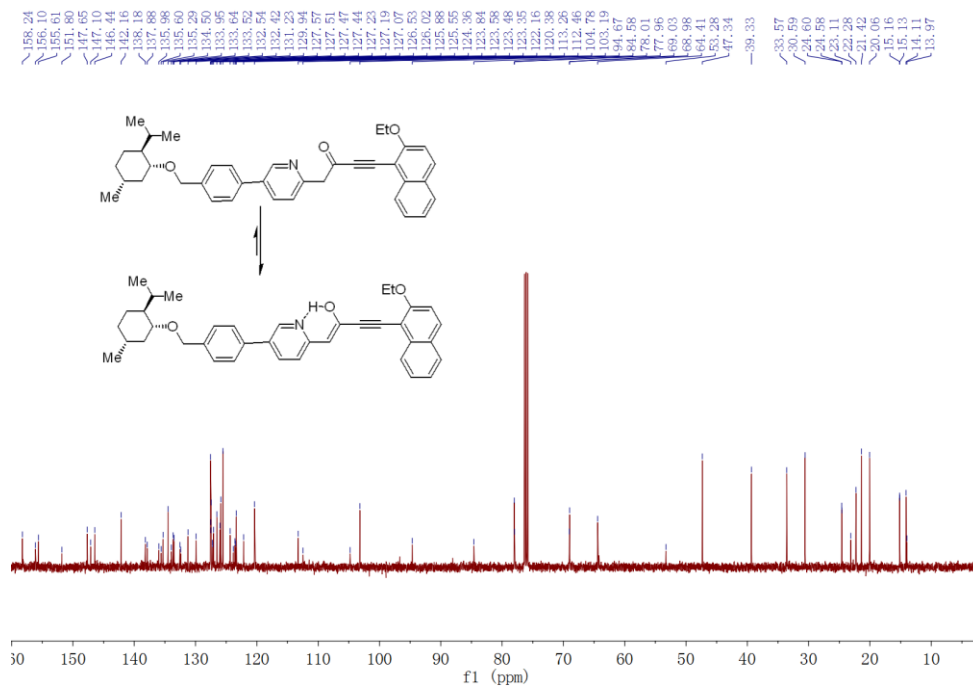

**Supplementary Fig. 64. <sup>13</sup>C NMR spectrum of 1z.**

**2a**, 4-(2-methoxynaphthalen-1-yl)-2H-quinolizin-2-one

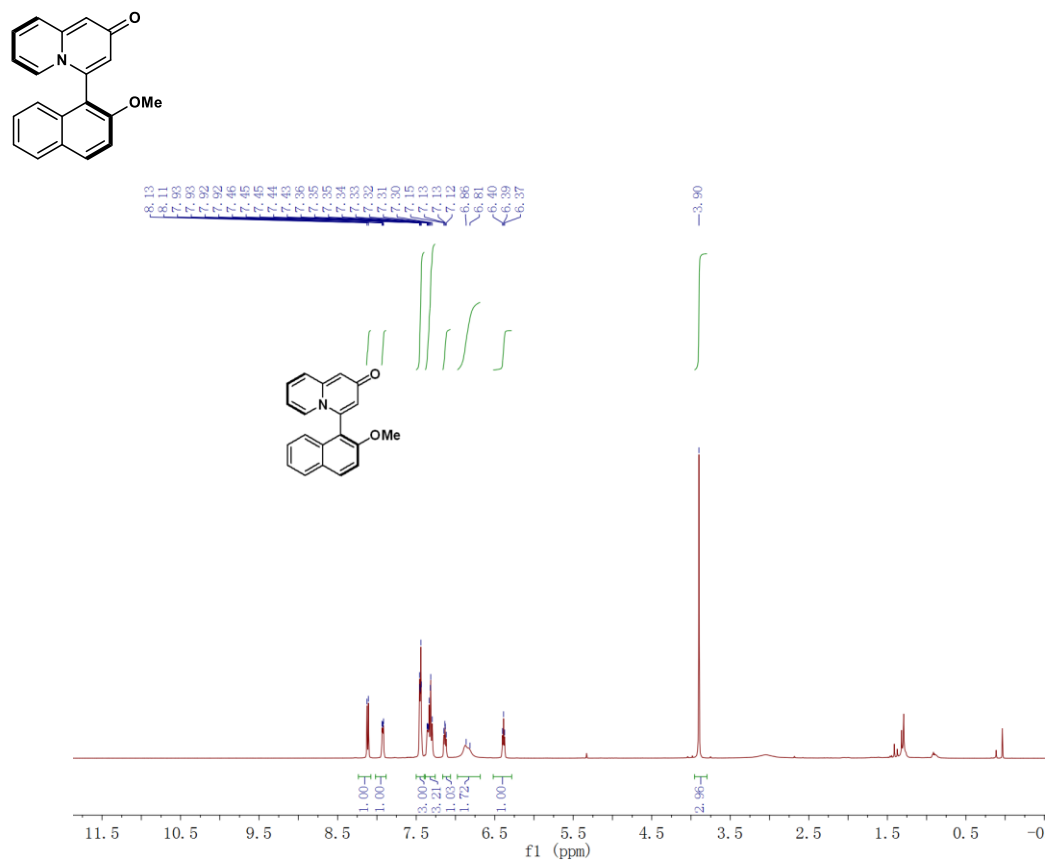

**Supplementary Fig. 65.** <sup>1</sup>H NMR spectrum of 2a.

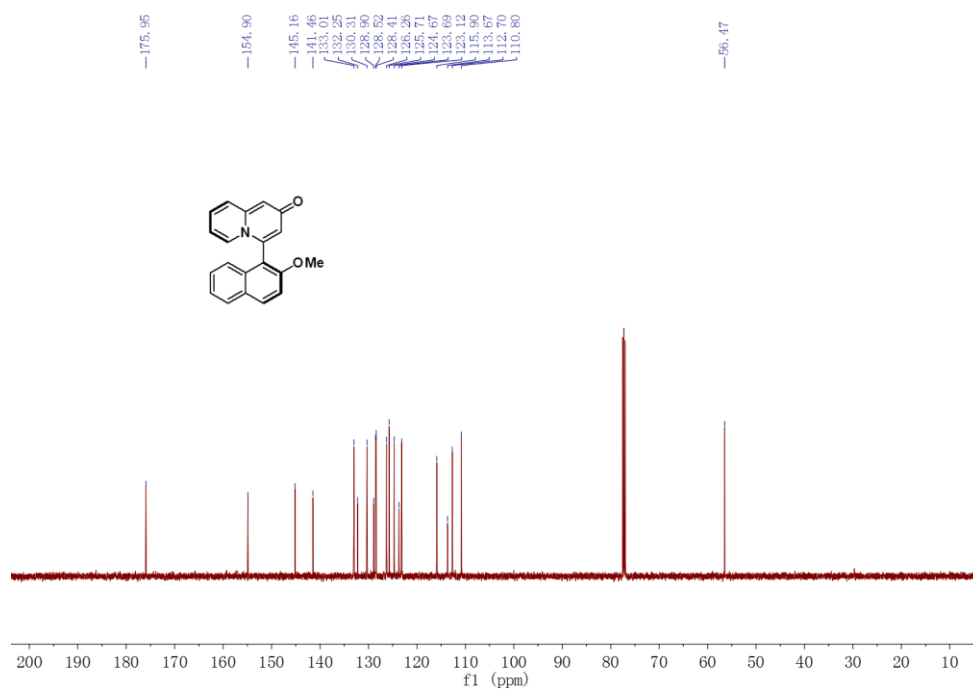

**Supplementary Fig. 66.** <sup>13</sup>C NMR spectrum of 2a.

**2b**, 4-(2-ethoxynaphthalen-1-yl)-2*H*-quinolizin-2-one

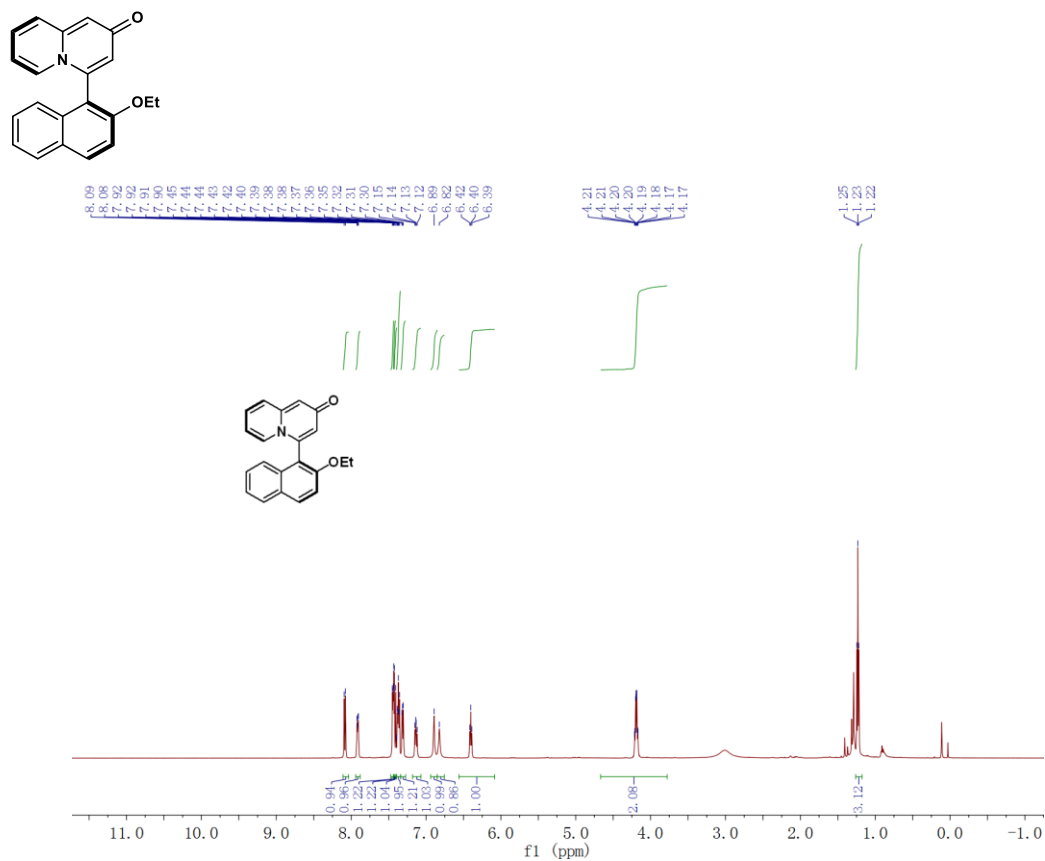

**Supplementary Fig. 67.** <sup>1</sup>H NMR spectrum of **2b**.

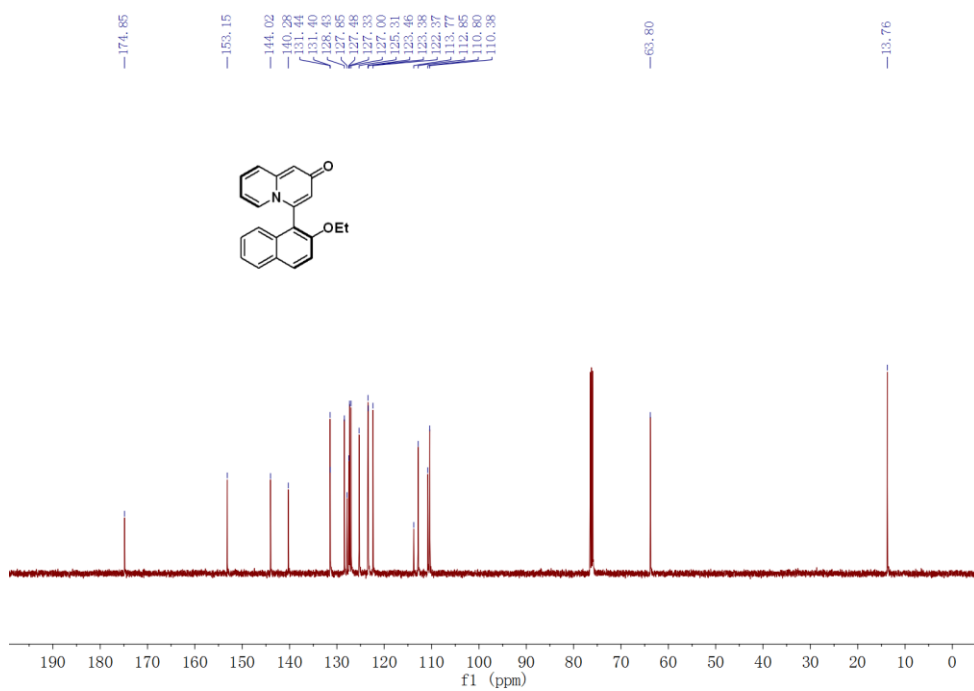

**Supplementary Fig. 68.** <sup>13</sup>C NMR spectrum of **2b**.

**2c**, 4-(6-bromo-2-ethoxynaphthalen-1-yl)-2*H*-quinolizin-2-one

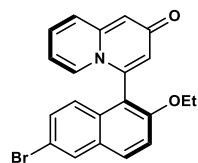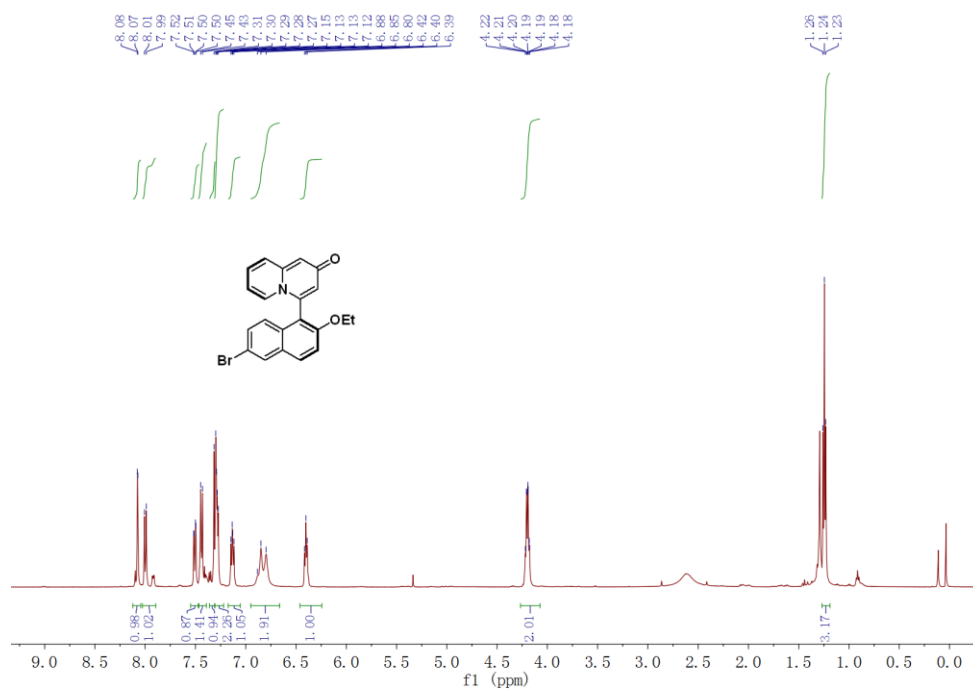

**Supplementary Fig. 69.** <sup>1</sup>H NMR spectrum of 2c.

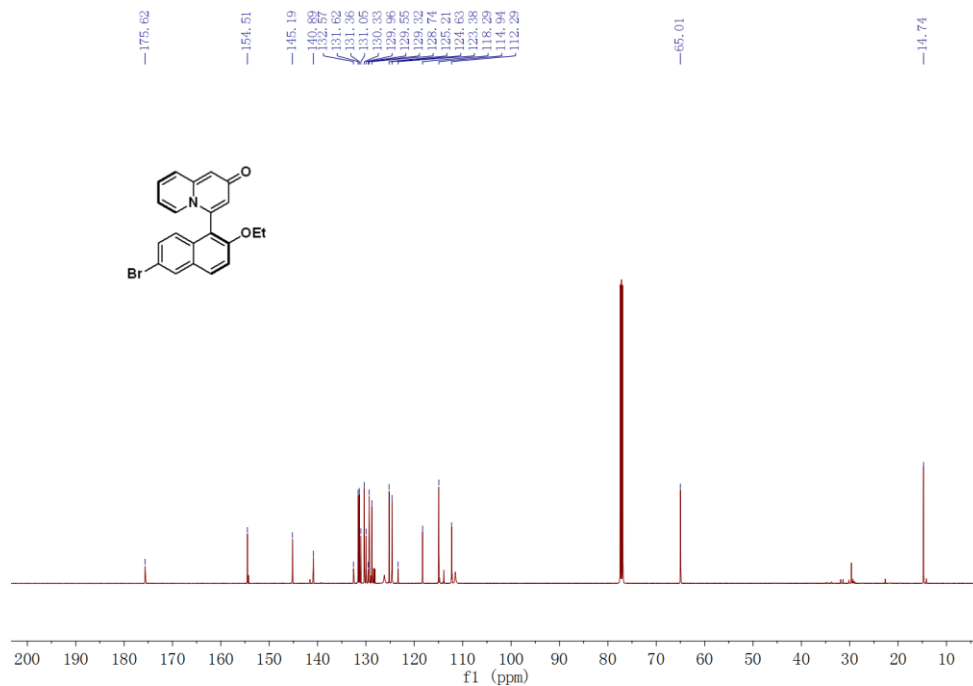

**Supplementary Fig. 70.** <sup>13</sup>C NMR spectrum of 2c.

**2d**, 4-(7-bromo-2-ethoxynaphthalen-1-yl)-2*H*-quinolizin-2-one

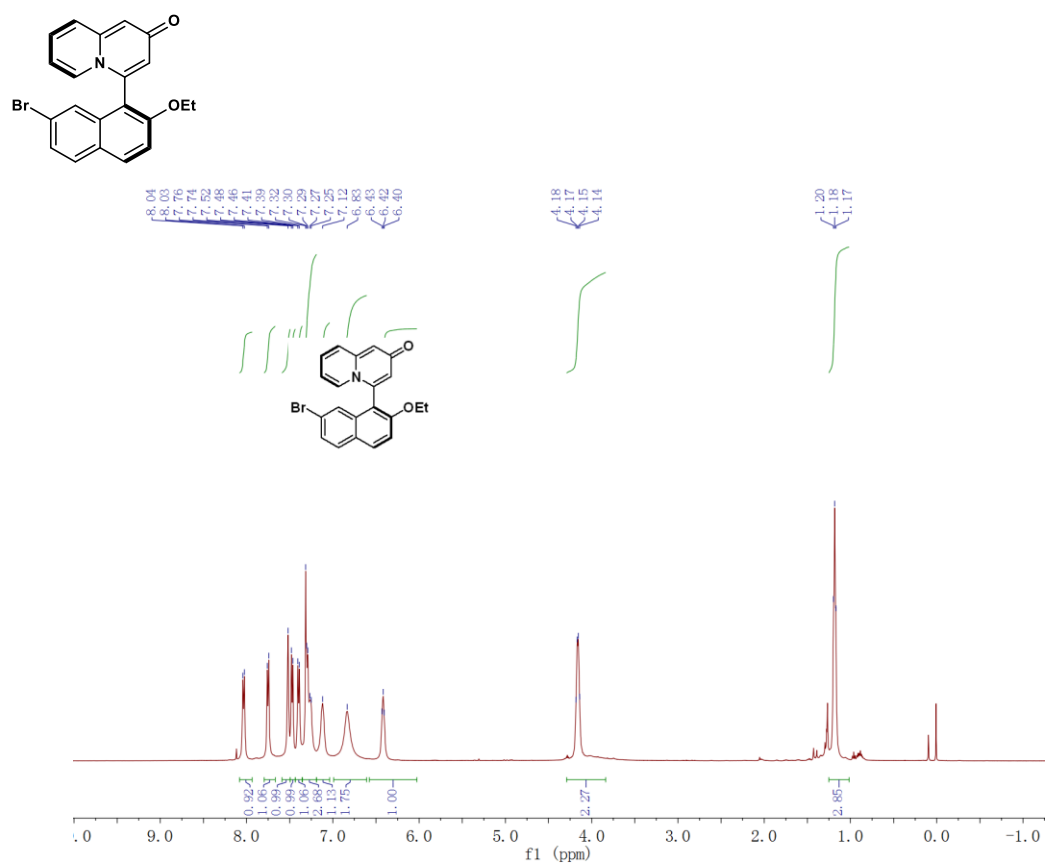

**Supplementary Fig. 71. <sup>1</sup>H NMR spectrum of 2d.**

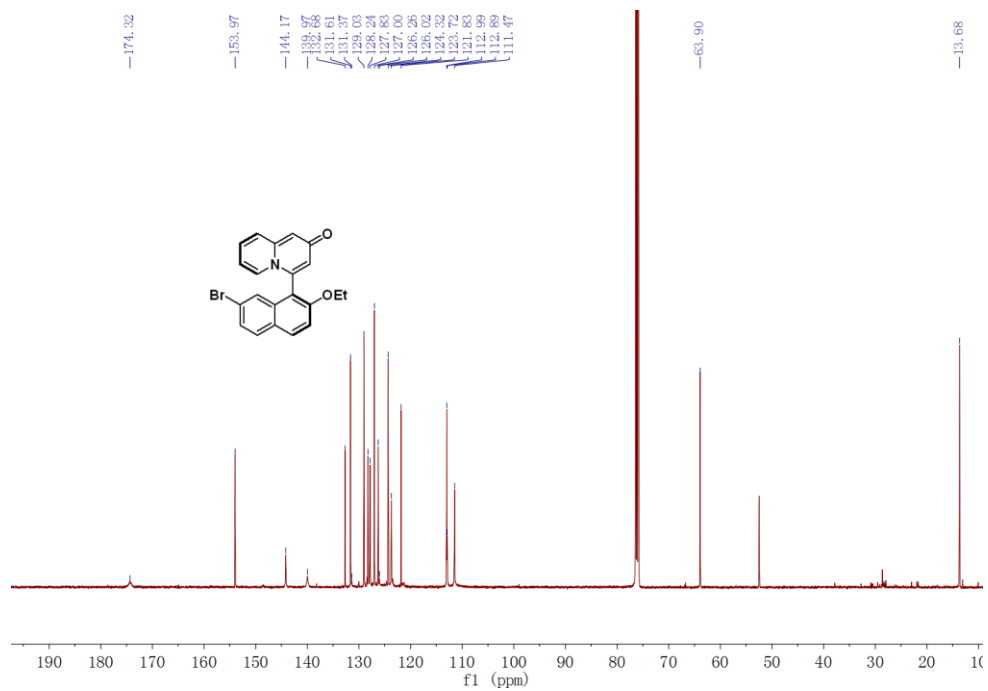

**Supplementary Fig. 72. <sup>13</sup>C NMR spectrum of 2d.**

2e, 4-(2-ethoxy-7-phenylnaphthalen-1-yl)-2H-quinolizin-2-one

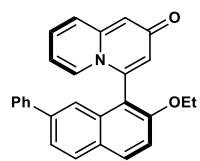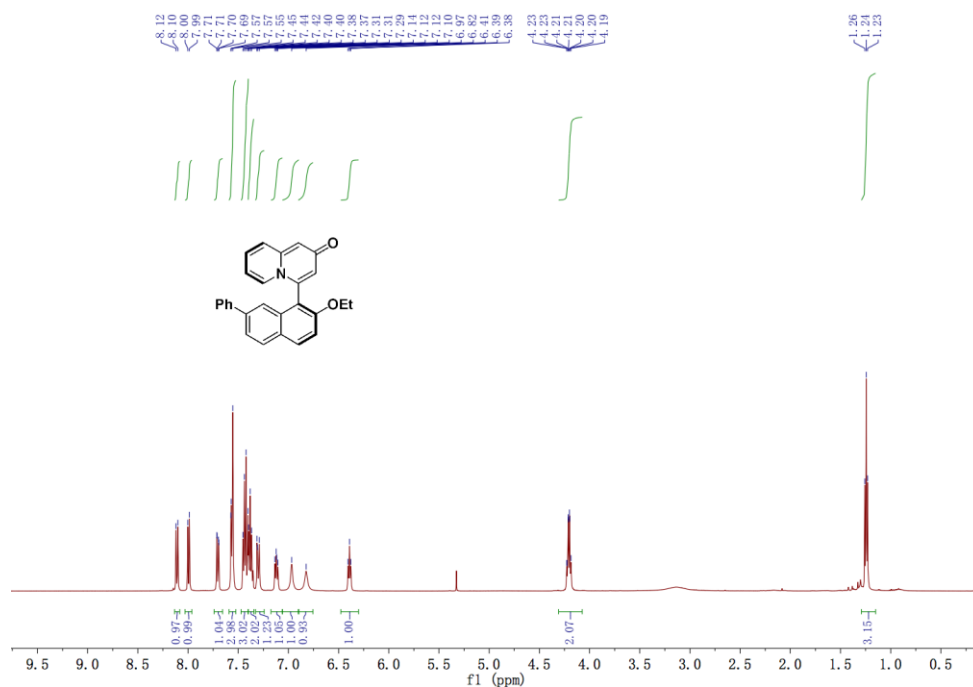

Supplementary Fig. 73. <sup>1</sup>H NMR spectrum of 2e.

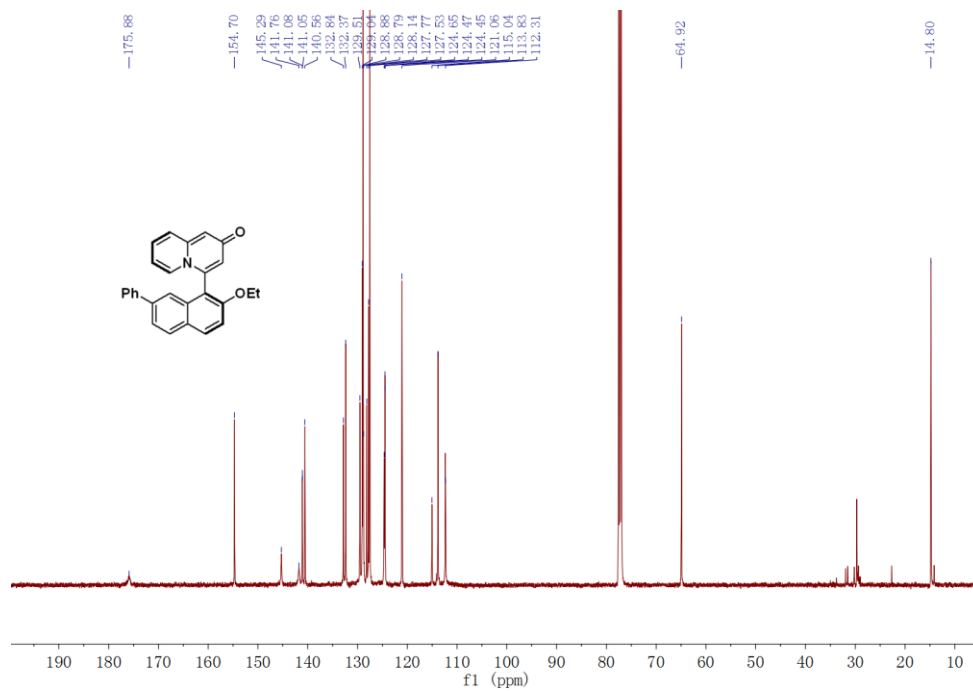

Supplementary Fig. 74. <sup>13</sup>C NMR spectrum of 2e.

**2f**, 4-(2-ethoxy-7-(phenylethynyl)naphthalen-1-yl)-2H-quinolizin-2-one

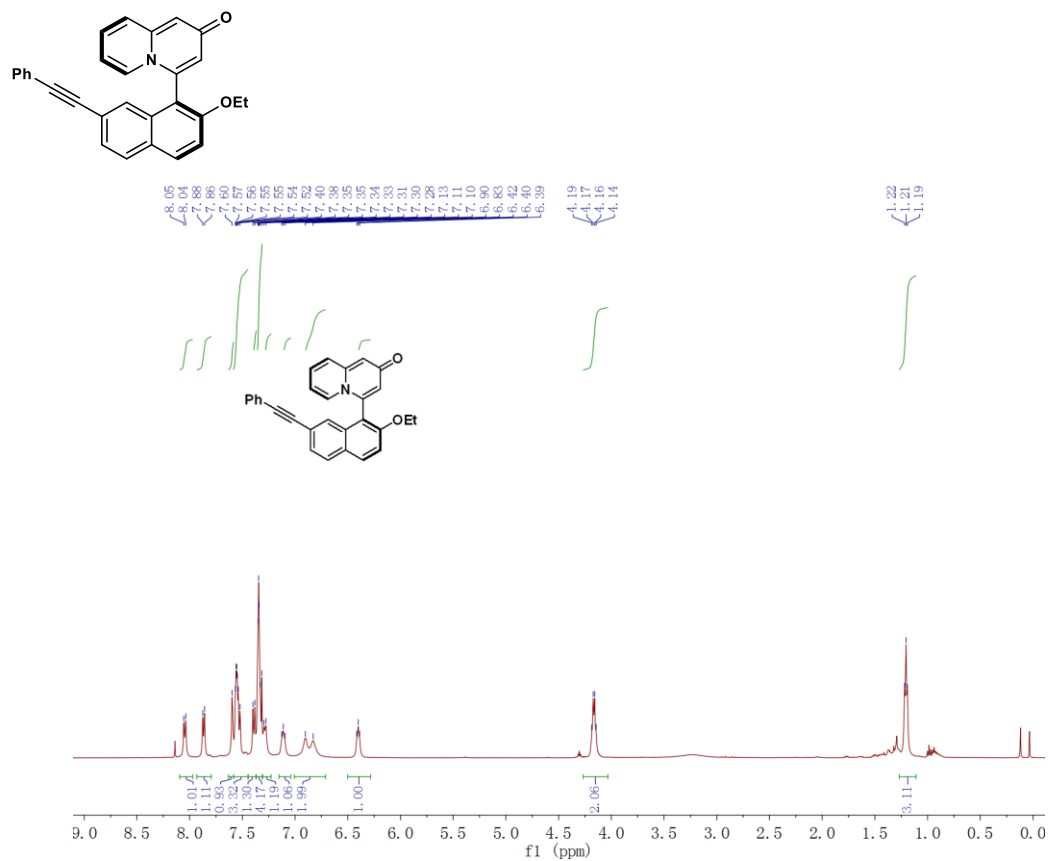

**Supplementary Fig. 75. <sup>1</sup>H NMR spectrum of 2f.**

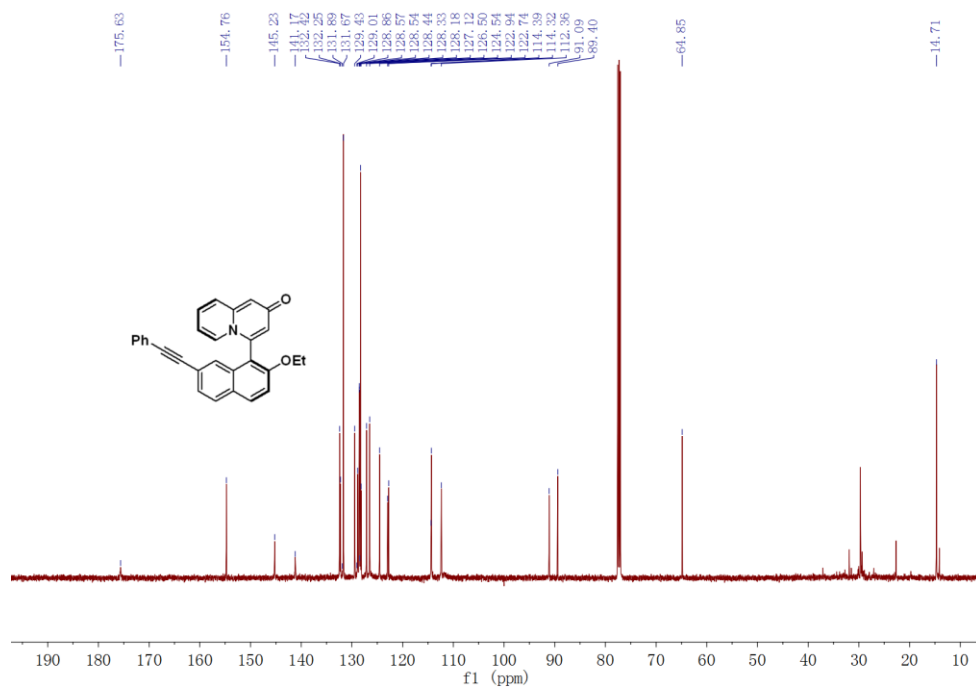

**Supplementary Fig. 76. <sup>13</sup>C NMR spectrum of 2f.**

**2g**, 4-(2-((4-methoxybenzyl)oxy)naphthalen-1-yl)-2H-quinolizin-2-one

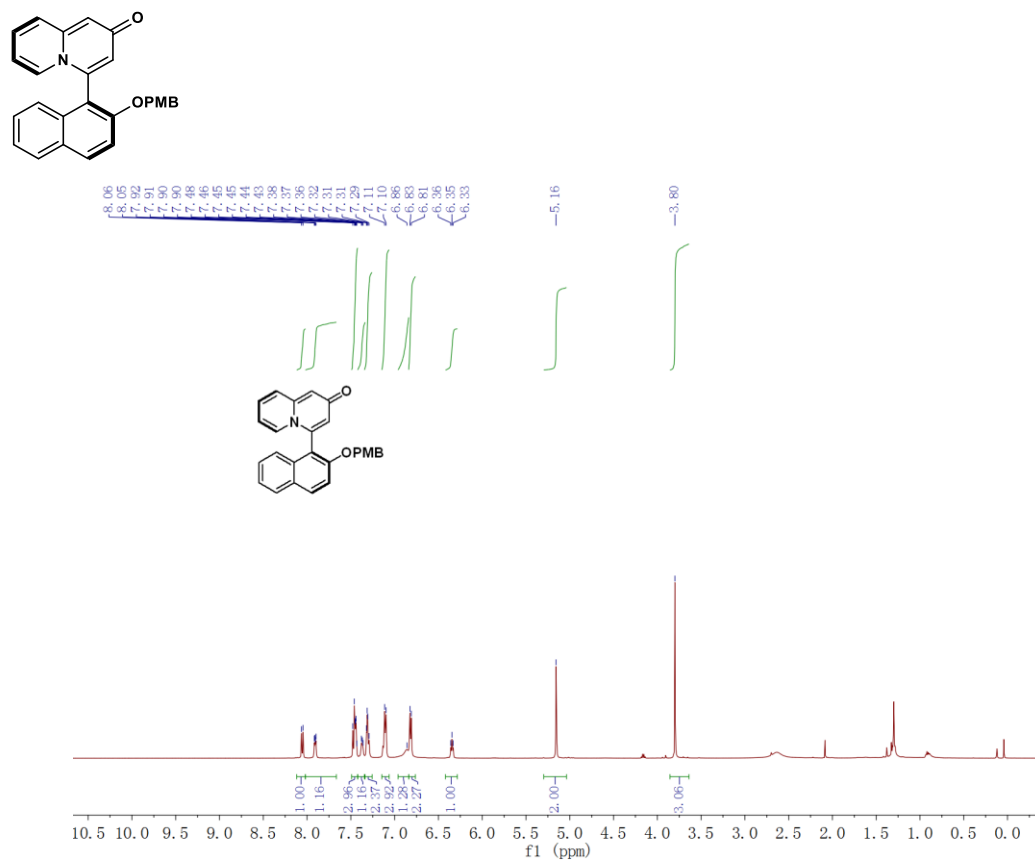

**Supplementary Fig. 77. <sup>1</sup>H NMR spectrum of 2g.**

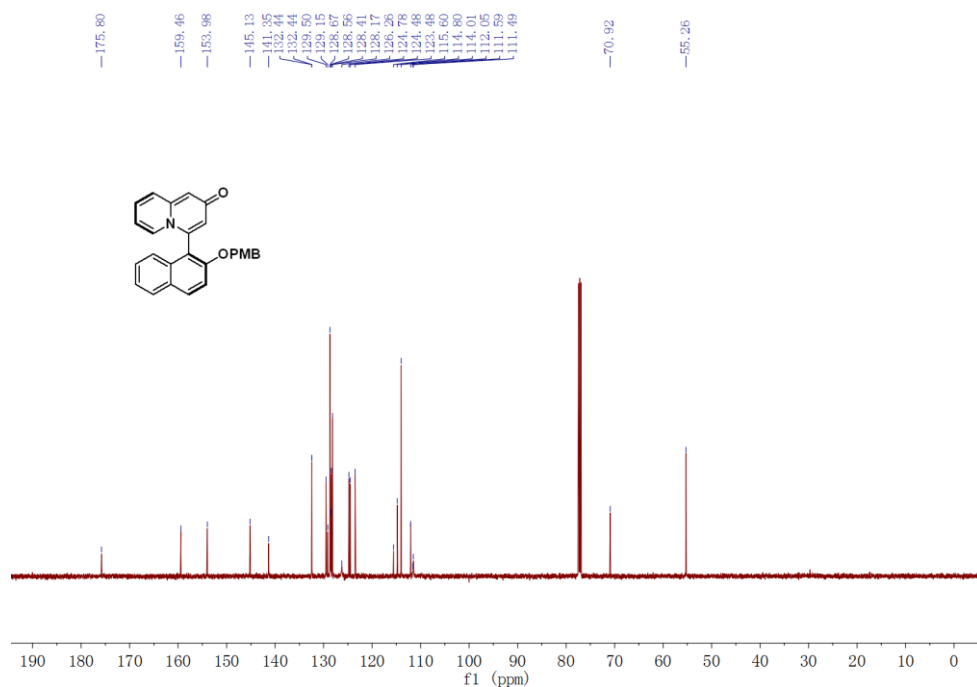

**Supplementary Fig. 78. <sup>13</sup>C NMR spectrum of 2g.**



**2h**, 4-(2-(dimethylamino)naphthalen-1-yl)-2H-quinolizin-2-one

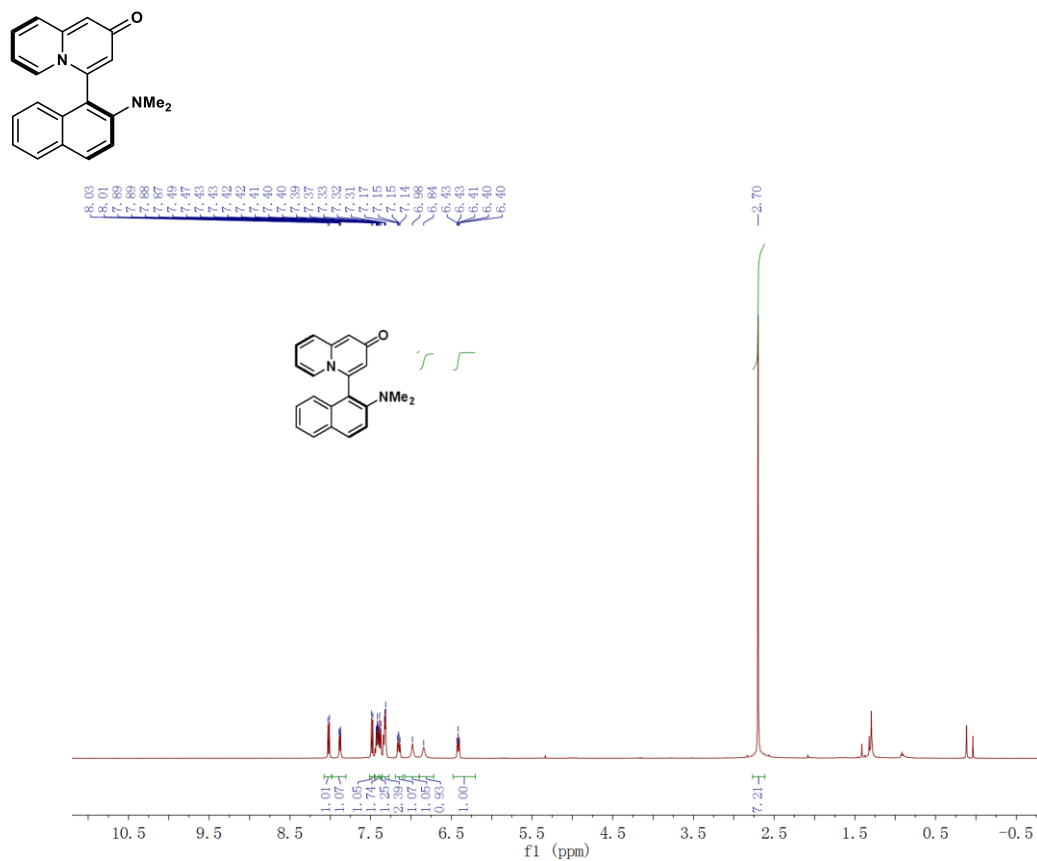

**Supplementary Fig. 79. <sup>1</sup>H NMR spectrum of 2h.**

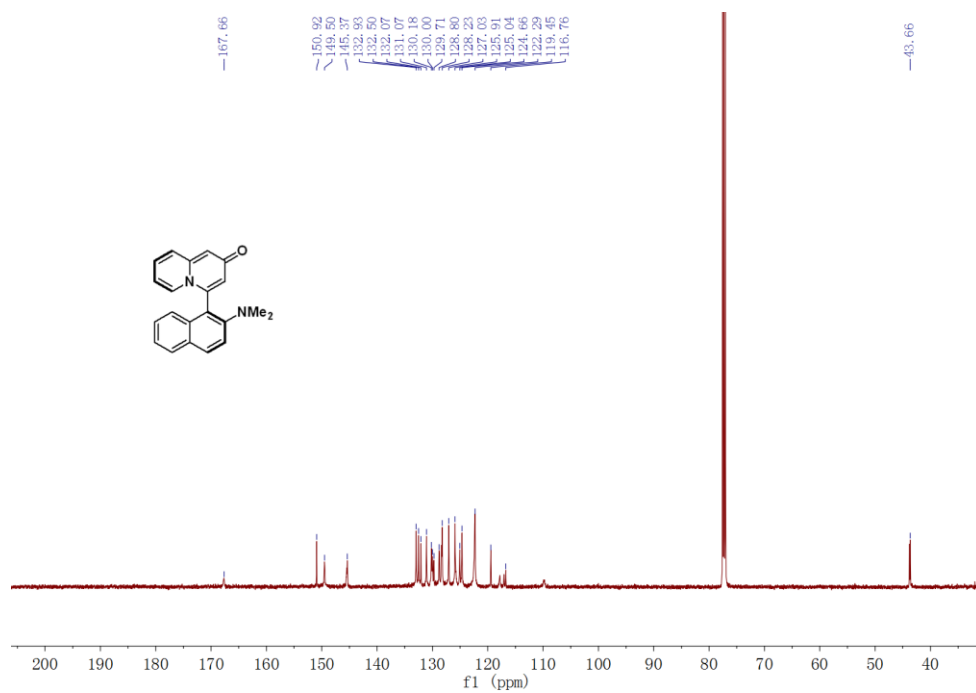

**Supplementary Fig. 80. <sup>13</sup>C NMR spectrum of 2h.**

**2i**, 4-(2-(dibenzylamino)naphthalen-1-yl)-2H-quinolizin-2-one

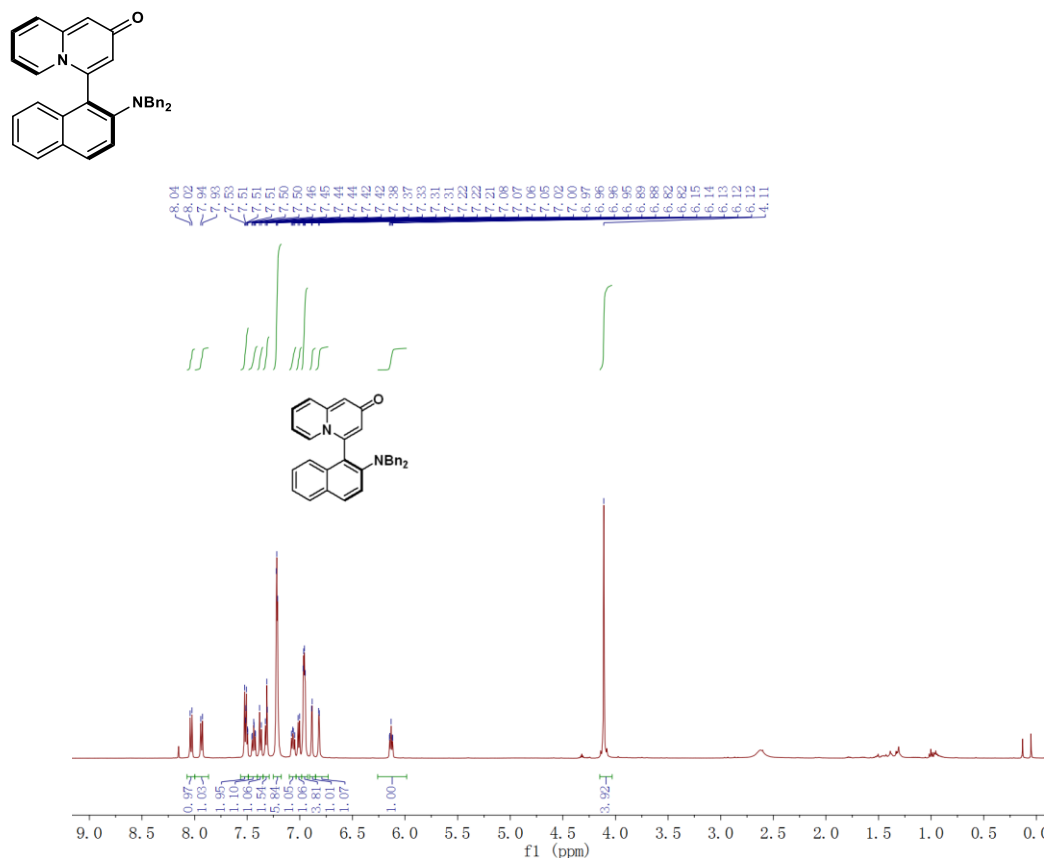

**Supplementary Fig. 81.**  $^1\text{H}$  NMR spectrum of **2i**.

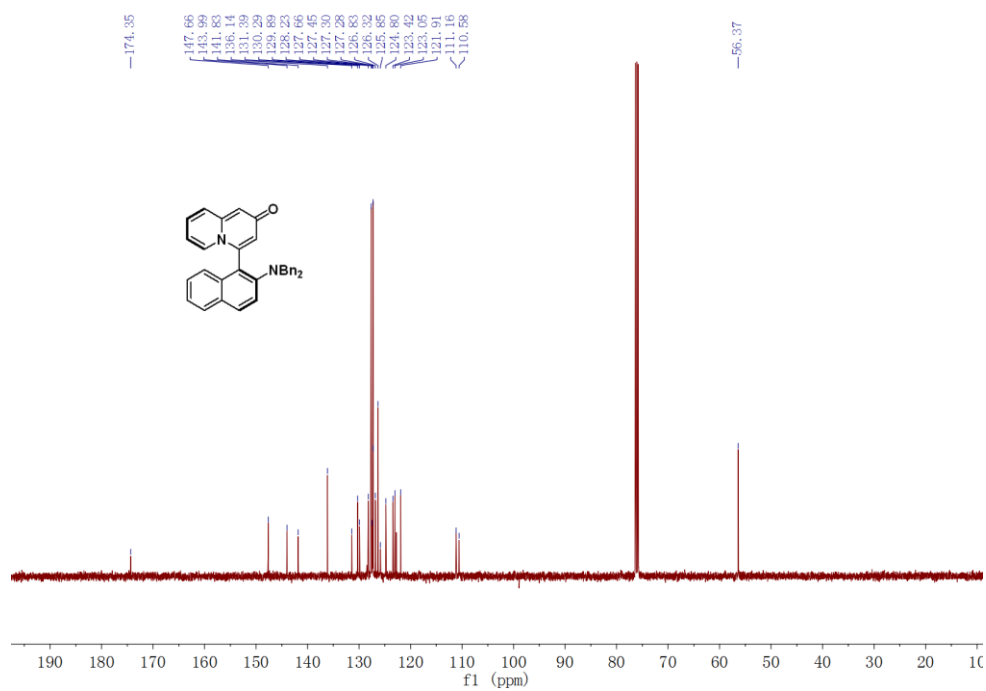

**Supplementary Fig. 82.**  $^{13}\text{C}$  NMR spectrum of **2i**.



**2k**, 4-(2-ethylnaphthalen-1-yl)-2*H*-quinolizin-2-one

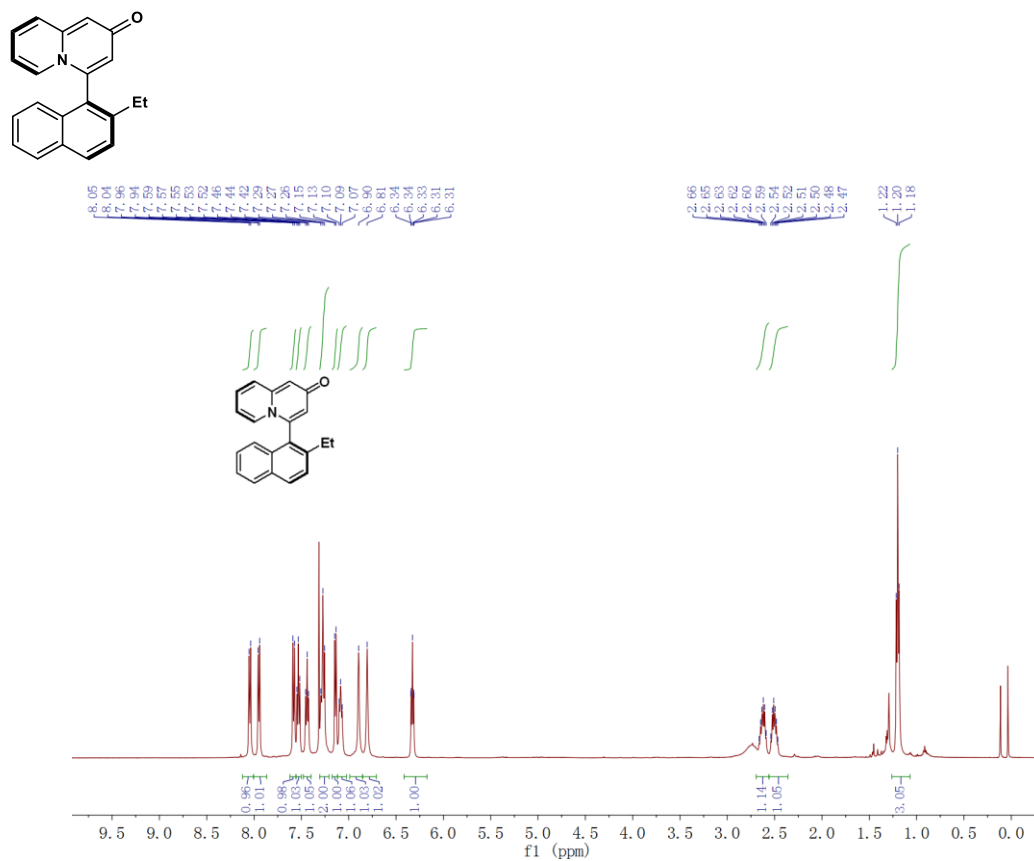

**Supplementary Fig. 85. <sup>1</sup>H NMR spectrum of 2k.**

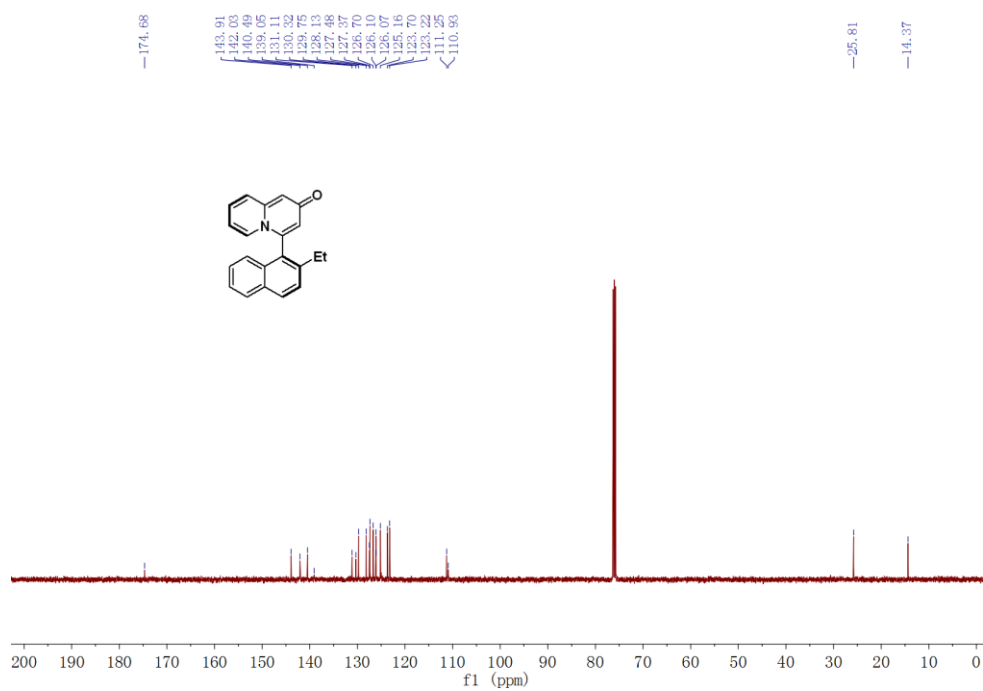

**Supplementary Fig. 86. <sup>13</sup>C NMR spectrum of 2k.**

**21**, 4-(2-butyl-naphthalen-1-yl)-2*H*-quinolizin-2-one

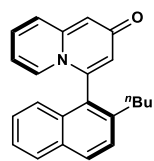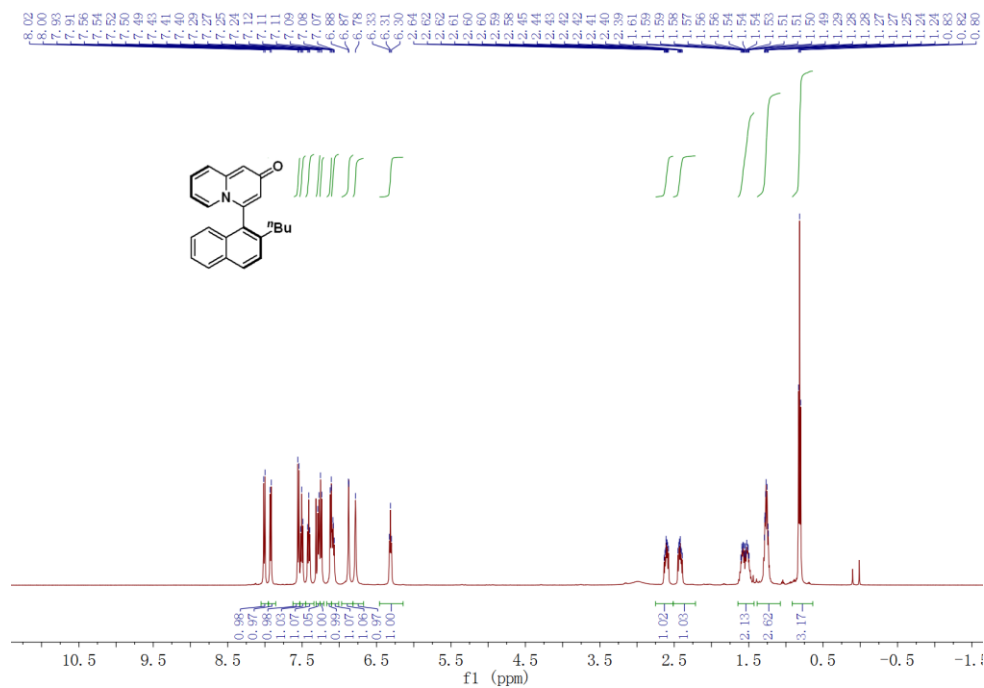

**Supplementary Fig. 87.**  $^1\text{H}$  NMR spectrum of **21**.

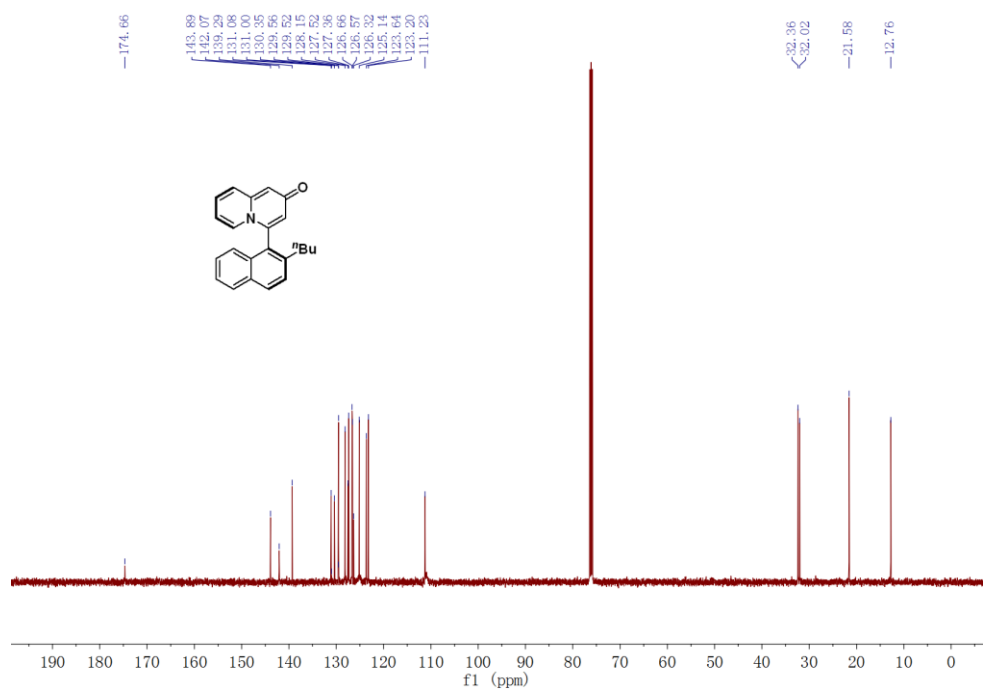

**Supplementary Fig. 88.**  $^{13}\text{C}$  NMR spectrum of **21**.

**2m**, 4-(2-isopropyl-naphthalen-1-yl)-2H-quinolizin-2-one

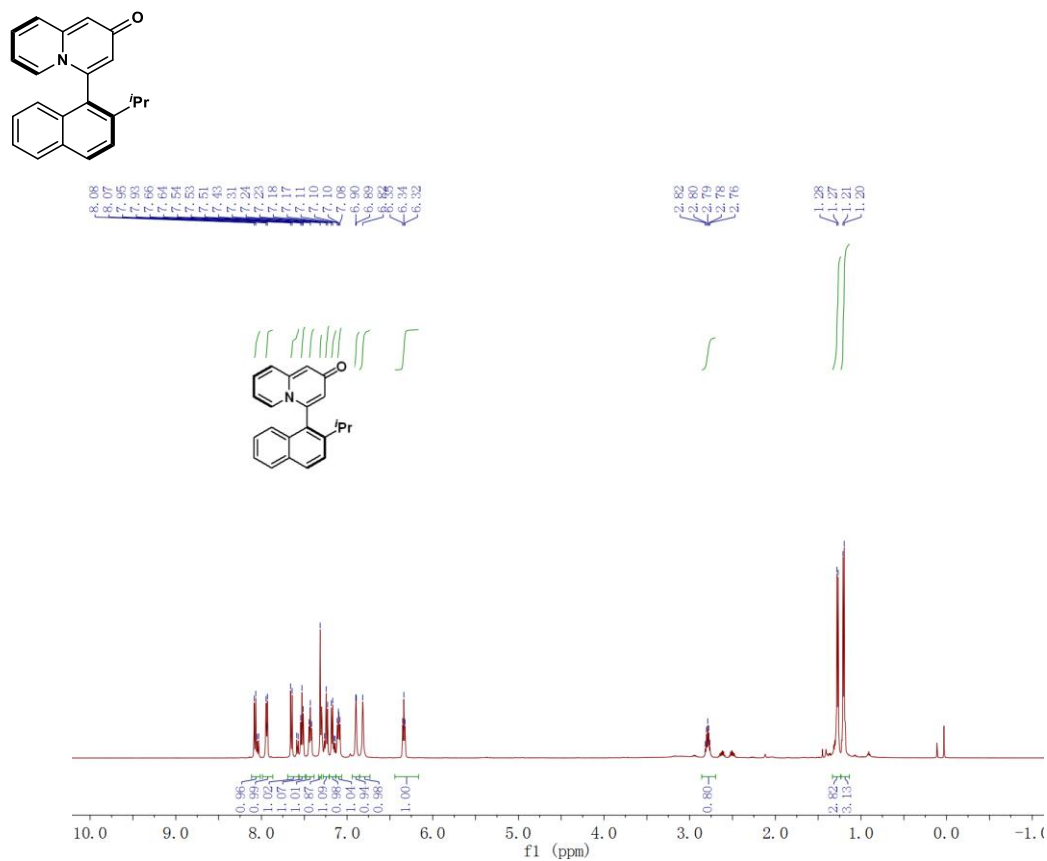

**Supplementary Fig. 89.** <sup>1</sup>H NMR spectrum of **2m**.

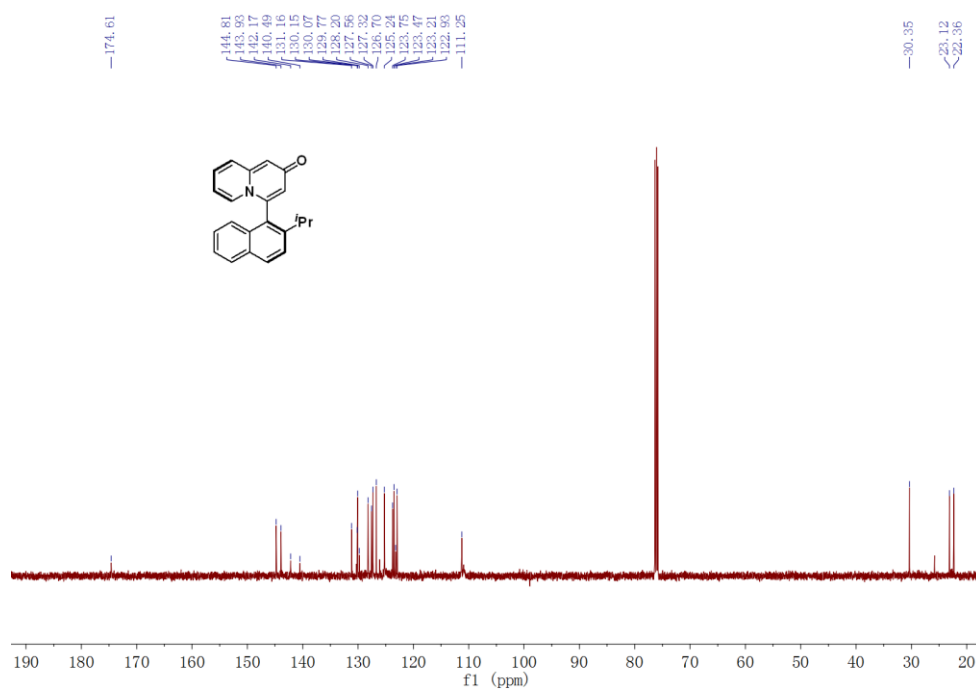

**Supplementary Fig. 90.** <sup>13</sup>C NMR spectrum of **2m**.

**2n**, 4-(2-phenylnaphthalen-1-yl)-2*H*-quinolizin-2-one

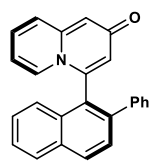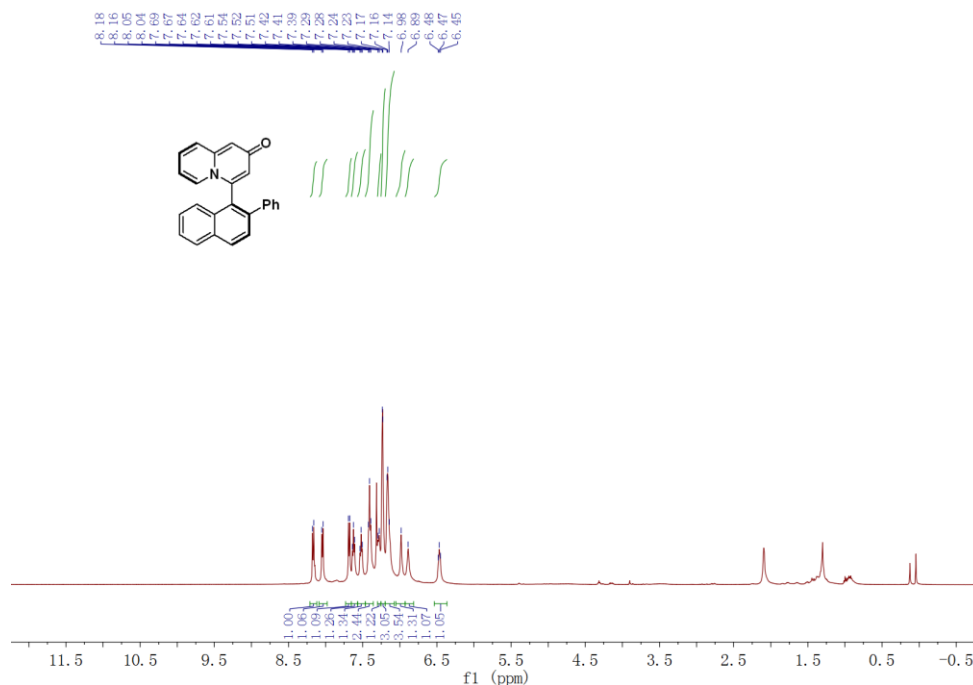

**Supplementary Fig. 91. <sup>1</sup>H NMR spectrum of 2n.**

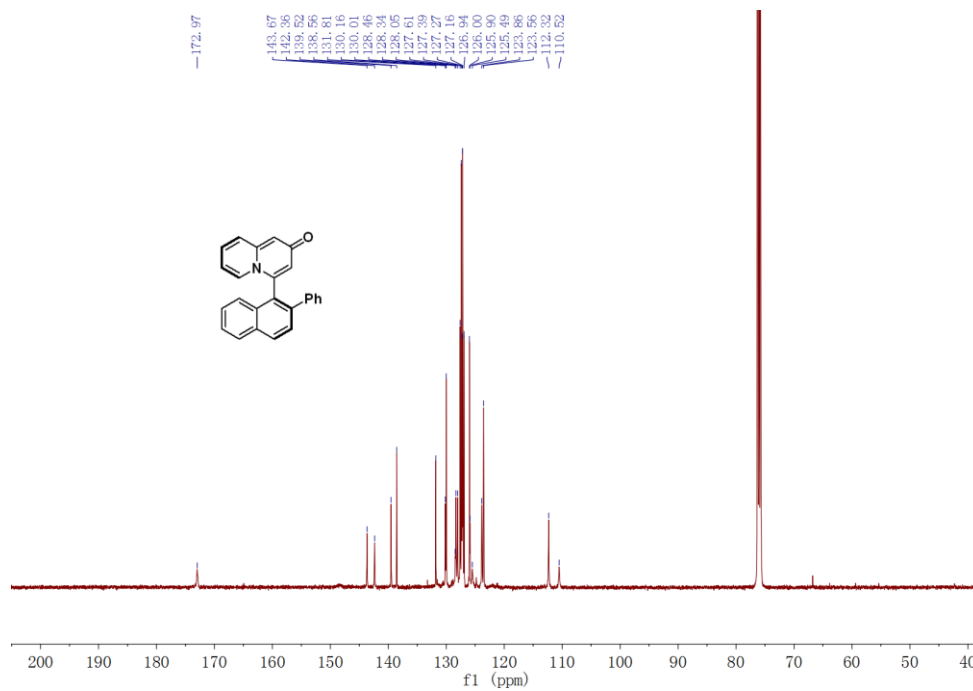

**Supplementary Fig. 92. <sup>13</sup>C NMR spectrum of 2n.**

**2o**, 4-([1,2'-binaphthalen]-1'-yl)-2*H*-quinolizin-2-one

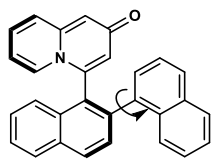

8.21  
8.20  
8.19  
8.17  
8.11  
8.10  
7.85  
7.82  
7.81  
7.78  
7.76  
7.75  
7.74  
7.72  
7.69  
7.67  
7.66  
7.61  
7.59  
7.51  
7.49  
7.47  
7.46  
7.45  
7.44  
7.42  
7.42  
7.41  
7.40  
7.36  
7.35  
7.34  
7.33  
7.33  
7.22  
7.19  
7.17  
7.15  
7.10  
7.09  
7.07  
7.04  
7.03  
7.02  
6.91  
6.86  
6.86  
6.51  
6.51  
6.49  
6.48  
6.47  
6.46  
6.46  
6.46

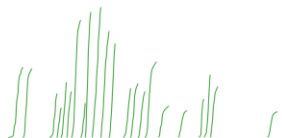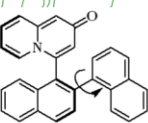

conformational isomers

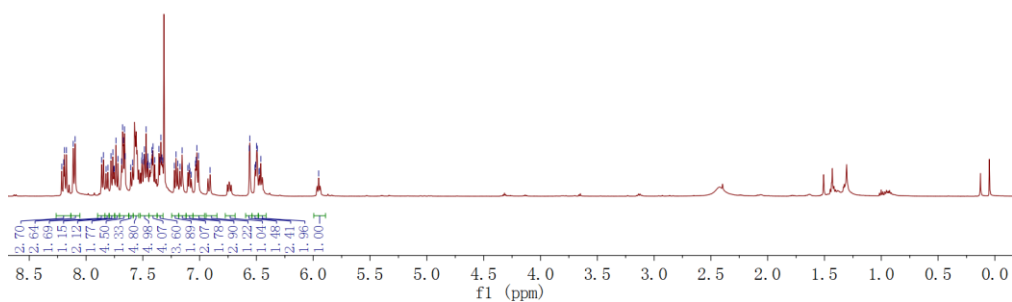

**Supplementary Fig. 93. <sup>1</sup>H NMR spectrum of 2o.**

174.20  
173.76  
143.43  
143.32  
141.97  
141.12  
138.38  
137.81  
136.37  
134.91  
132.57  
132.03  
131.11  
130.81  
130.73  
130.27  
130.20  
129.01  
128.54  
128.27  
128.27  
127.93  
127.89  
127.70  
127.69  
127.57  
127.37  
127.33  
127.24  
127.18  
127.09  
127.04  
126.15  
126.10  
125.80  
125.32  
124.82  
124.78  
124.22  
124.10  
124.07  
123.98  
123.67  
123.41  
123.25  
123.12  
111.12  
110.70  
110.50  
110.45

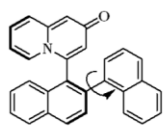

conformational isomers

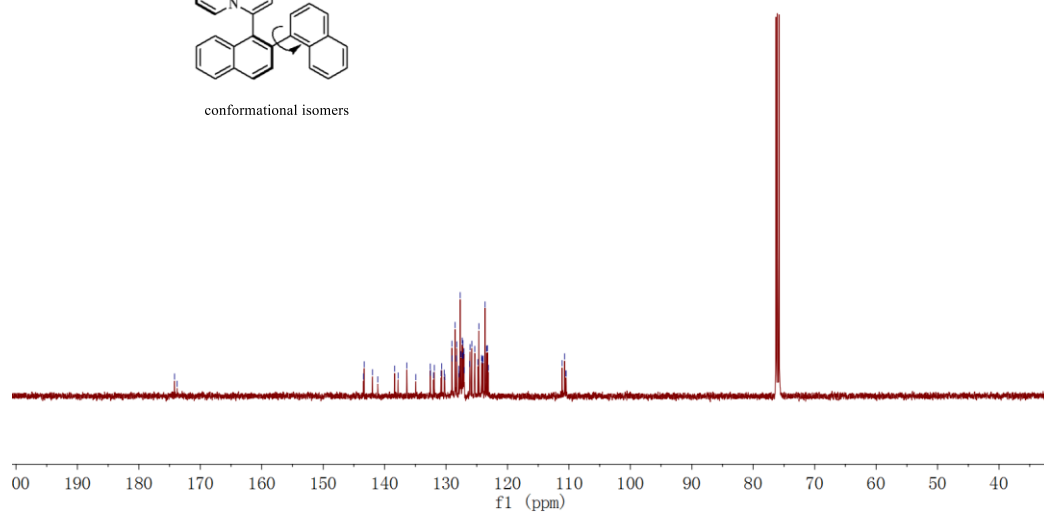



**Supplementary Fig. 94.  $^{13}\text{C}$  NMR spectrum of 2o.**

**2p**, 4-(2-bromonaphthalen-1-yl)-2*H*-quinolizin-2-one

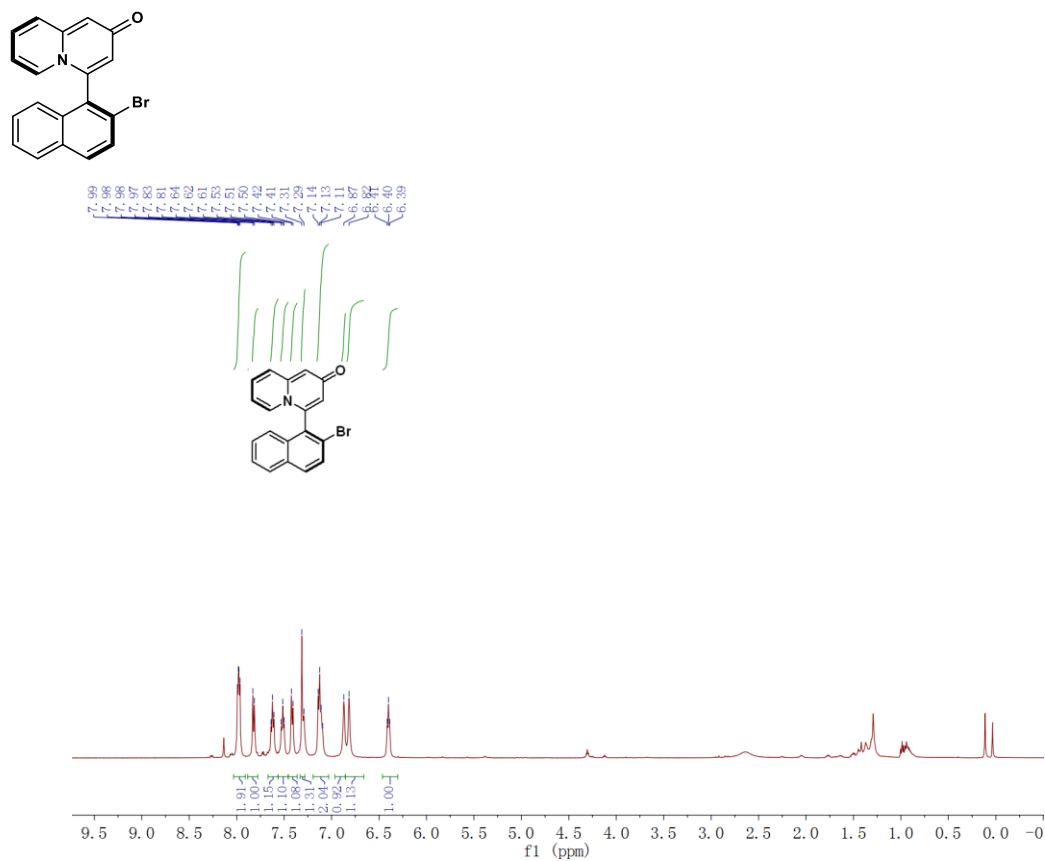

**Supplementary Fig. 95.** <sup>1</sup>H NMR spectrum of 2p.

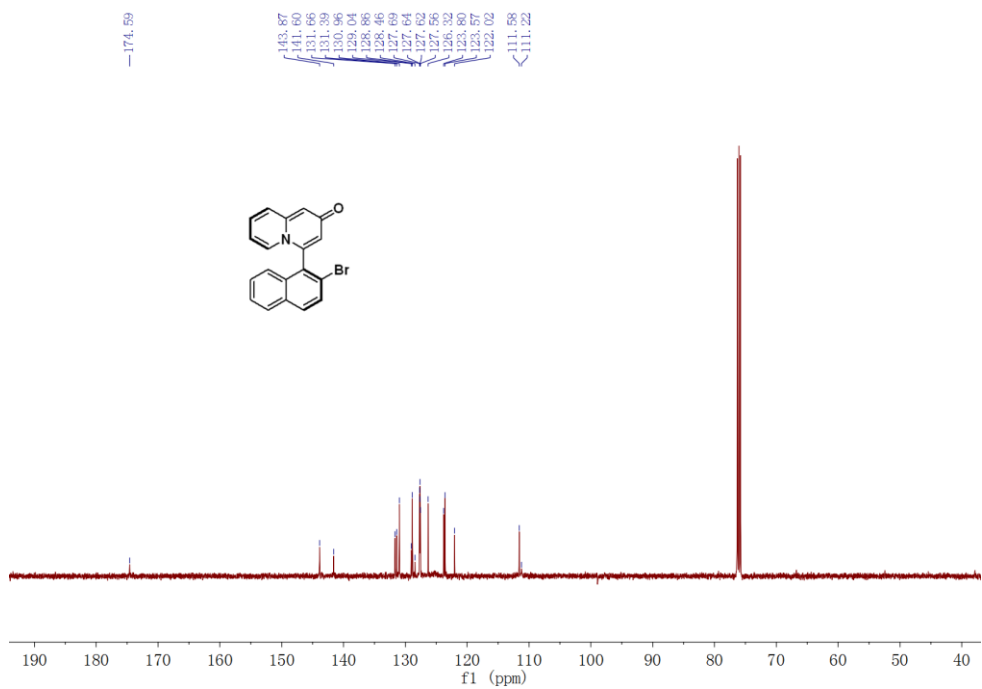

**Supplementary Fig. 96.** <sup>13</sup>C NMR spectrum of 2p.

**2q**, 4-(2-chloronaphthalen-1-yl)-2H-quinolizin-2-one

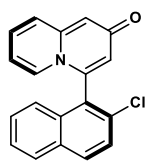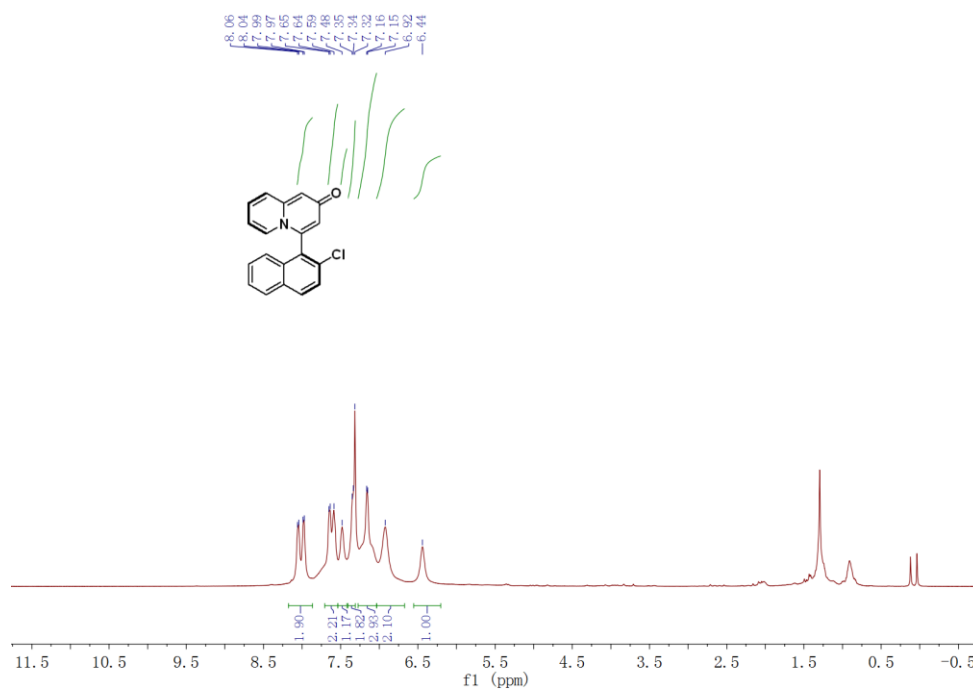

**Supplementary Fig. 97. <sup>1</sup>H NMR spectrum of 2q.**

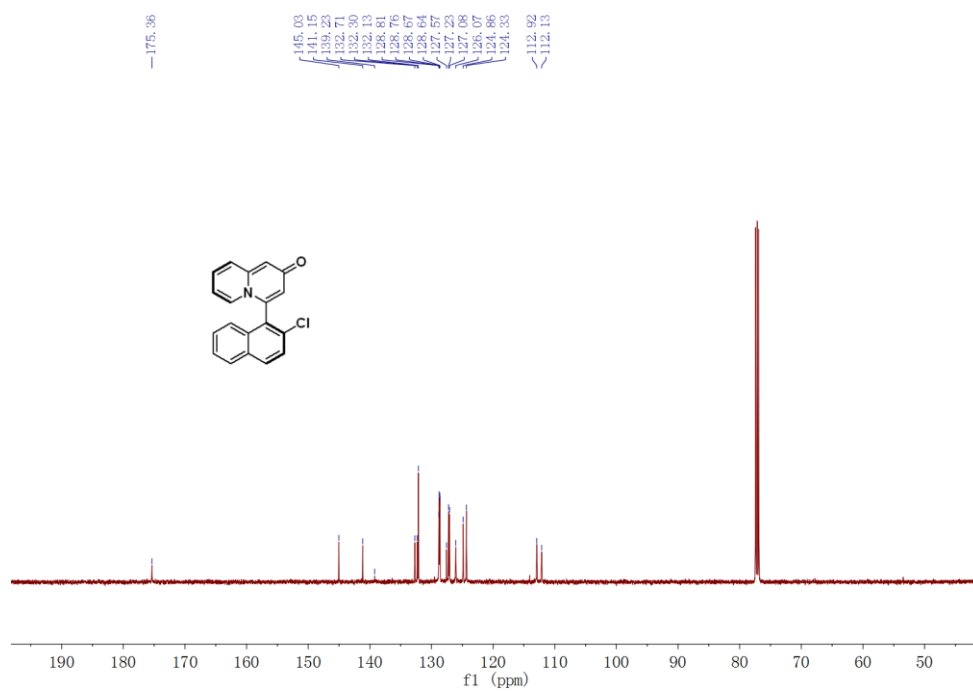

**Supplementary Fig. 98. <sup>13</sup>C NMR spectrum of 2q.**

**2r**, 9-bromo-4-(2-ethoxynaphthalen-1-yl)-2H-quinolizin-2-one

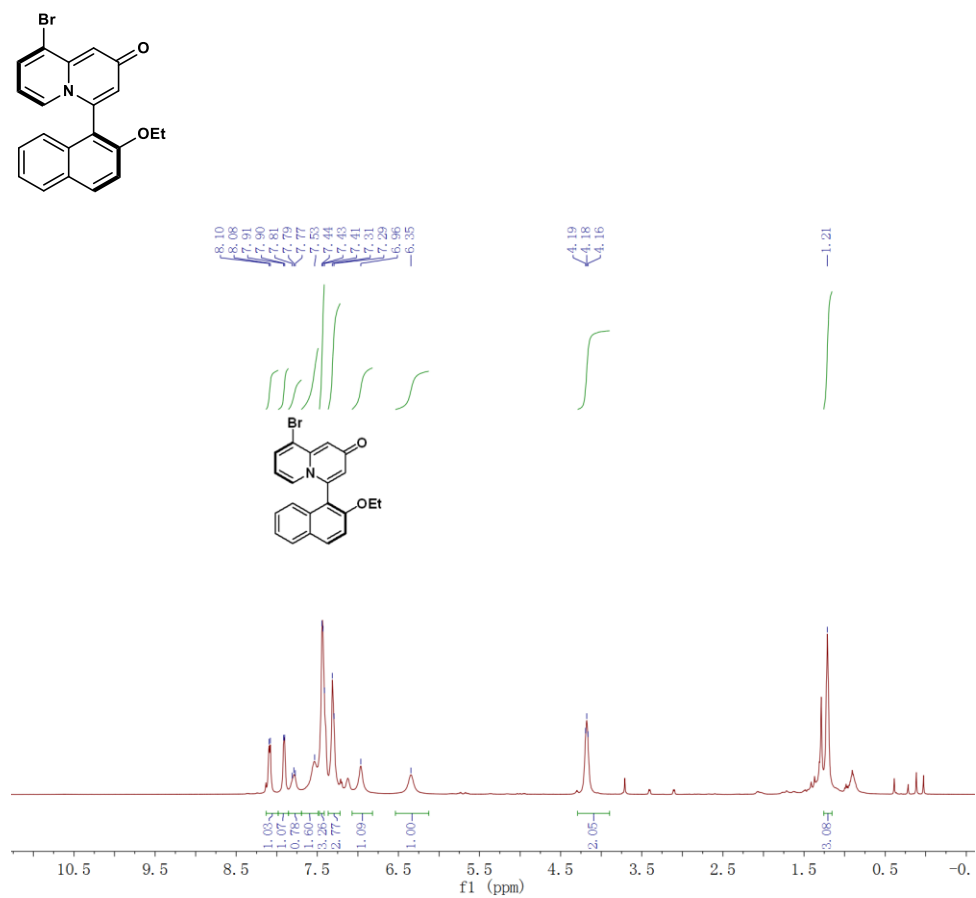

**Supplementary Fig. 99. <sup>1</sup>H NMR spectrum of 2r.**

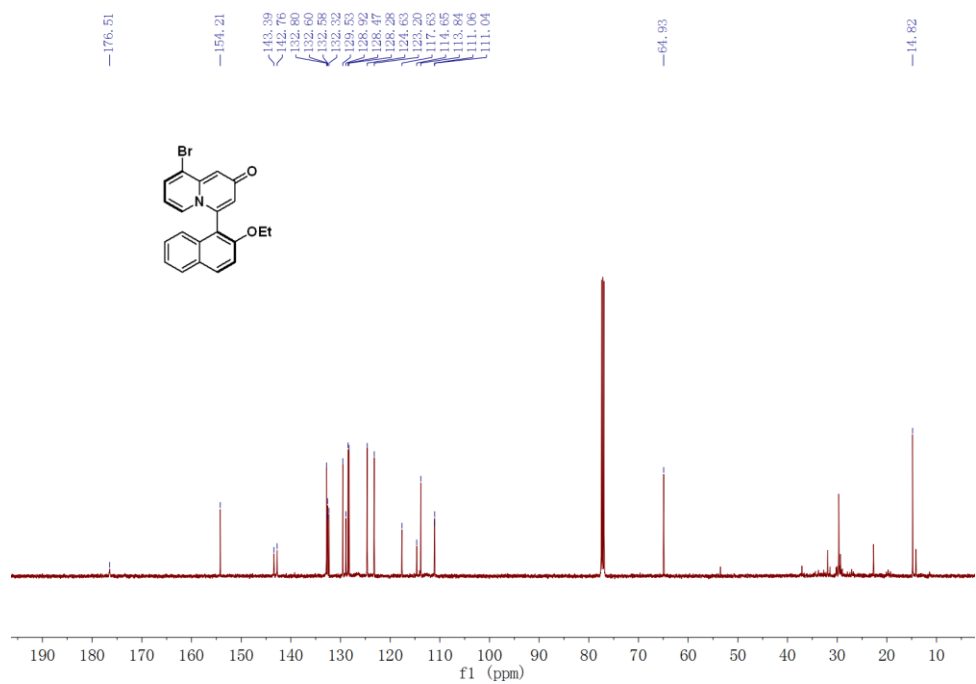

**Supplementary Fig. 100. <sup>13</sup>C NMR spectrum of 2r.**

**2s**, 8-bromo-4-(2-ethoxynaphthalen-1-yl)-2*H*-quinolizin-2-one

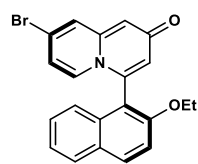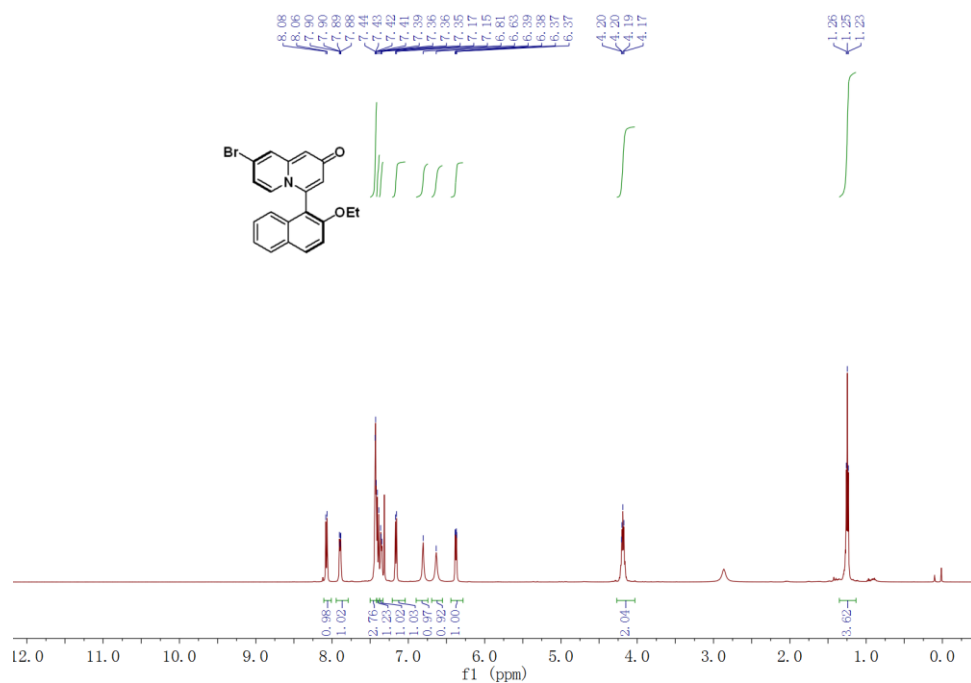

**Supplementary Fig. 101.** <sup>1</sup>H NMR spectrum of **2s**.

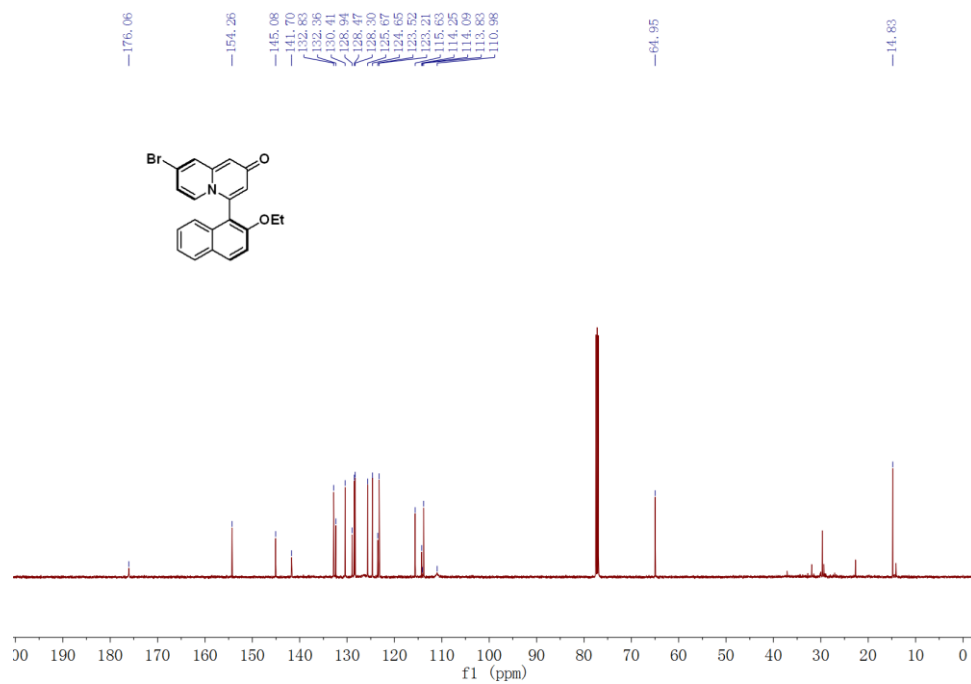

**Supplementary Fig. 102.** <sup>13</sup>C NMR spectrum of **2s**.

**2t**, 8-chloro-4-(2-ethoxynaphthalen-1-yl)-2H-quinolizin-2-one

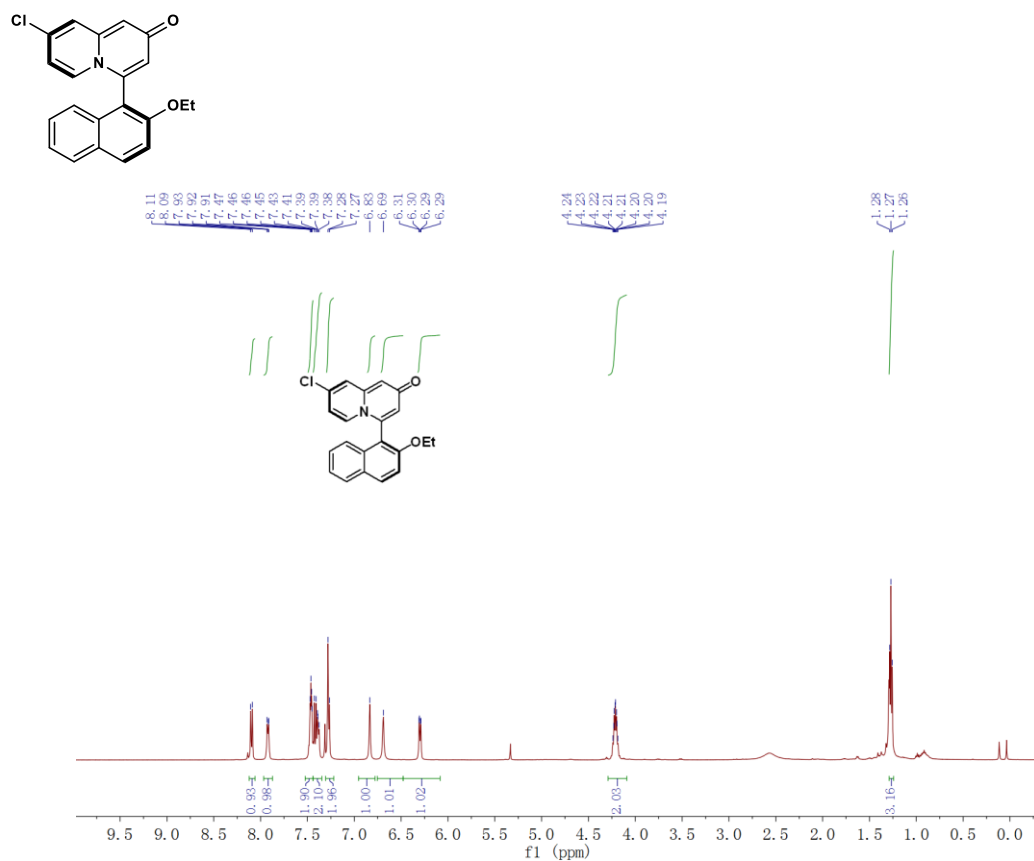

**Supplementary Fig. 103.**  $^1\text{H}$  NMR spectrum of **2t**.

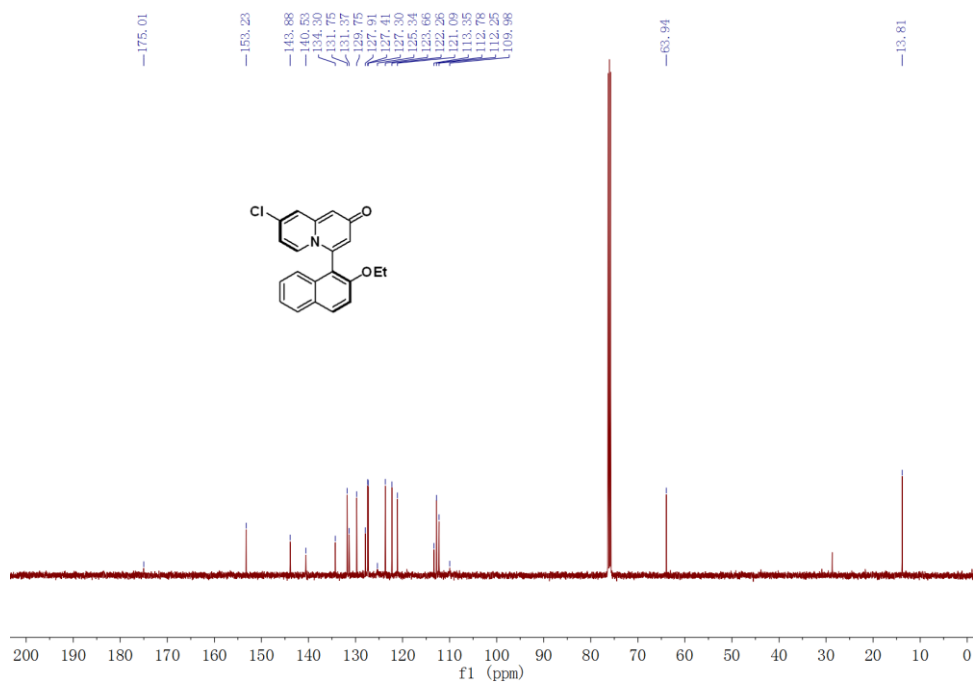

**Supplementary Fig. 104.**  $^{13}\text{C}$  NMR spectrum of **2t**.



2v, 4-(2-ethoxynaphthalen-1-yl)-7-methyl-2H-quinolizin-2-one

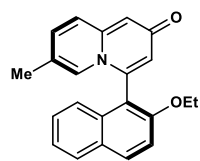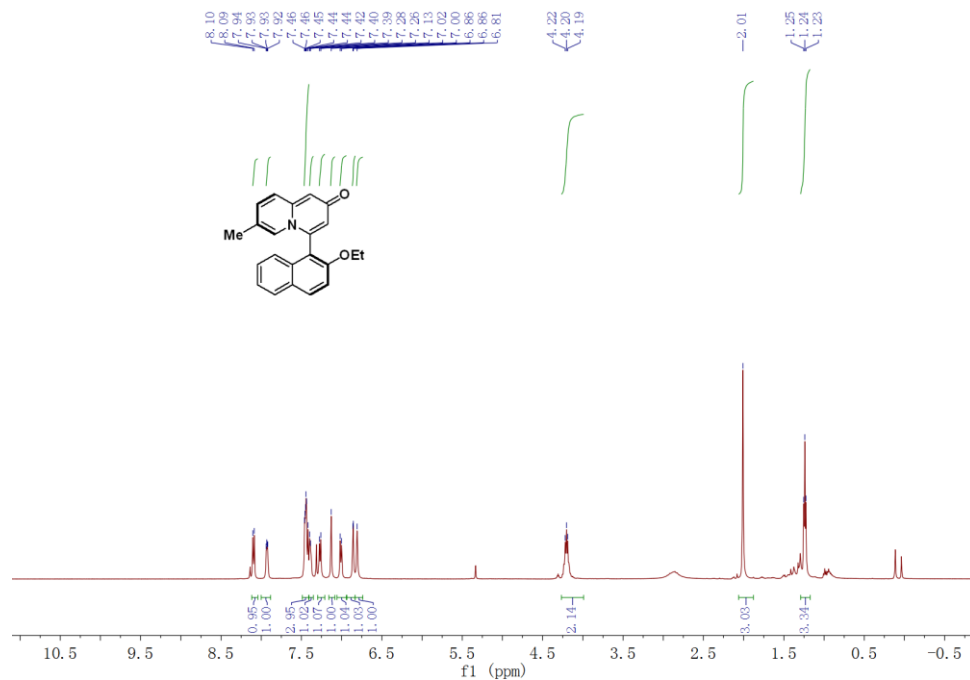

Supplementary Fig. 107. <sup>1</sup>H NMR spectrum of 2v.

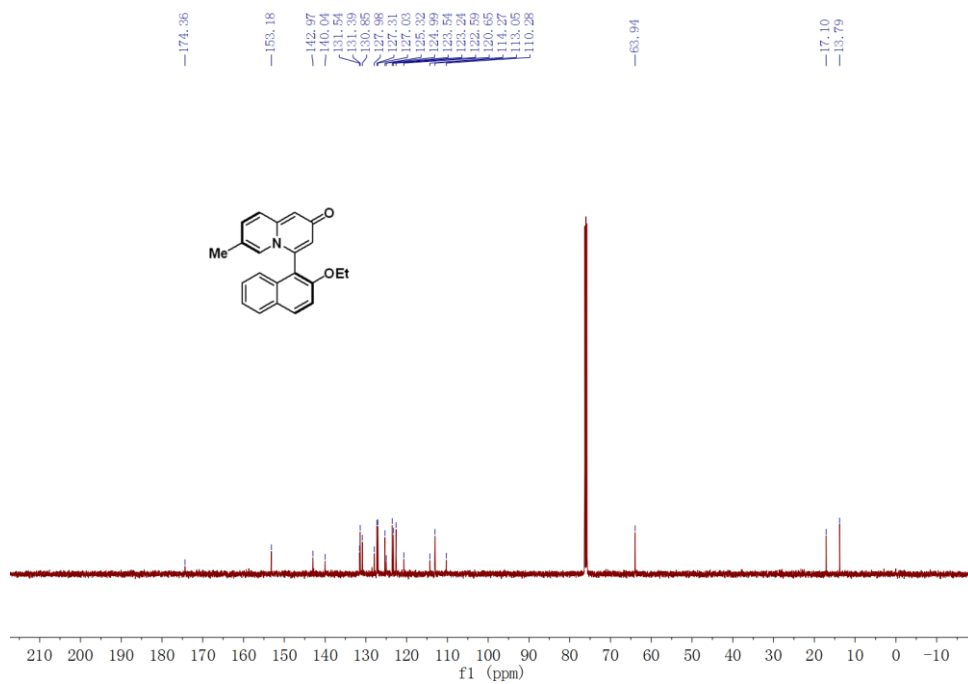

Supplementary Fig. 108. <sup>13</sup>C NMR spectrum of 2v.



**2w**, 6-(2-ethoxynaphthalen-1-yl)-8*H*-pyrido[1,2-*a*]pyrazin-8-one

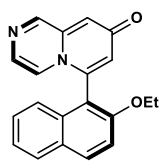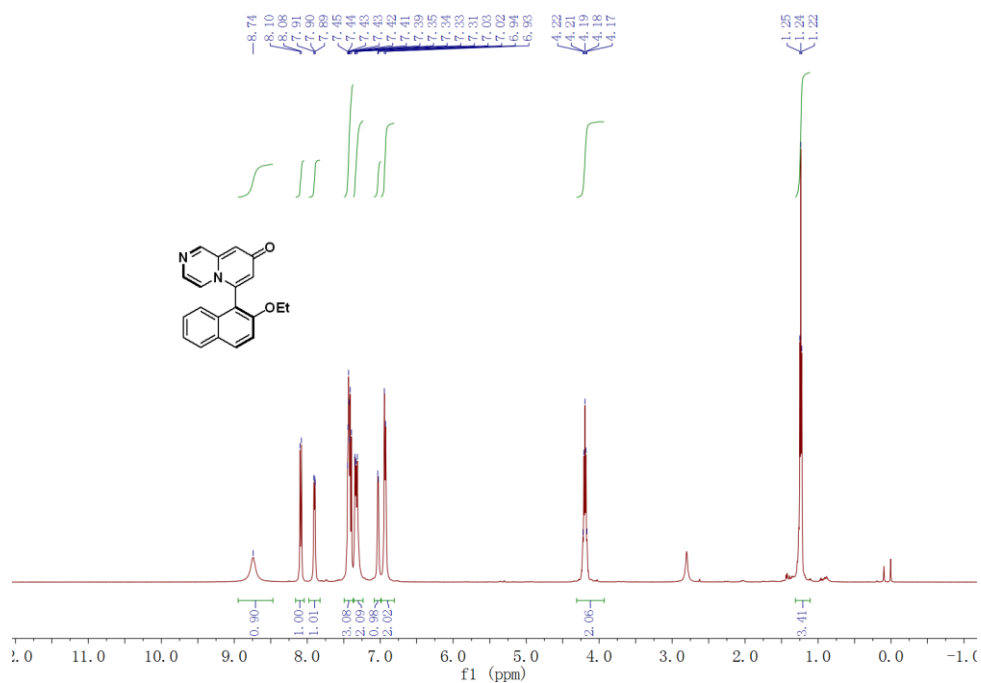

**Supplementary Fig. 109. <sup>1</sup>H NMR spectrum of 2w.**

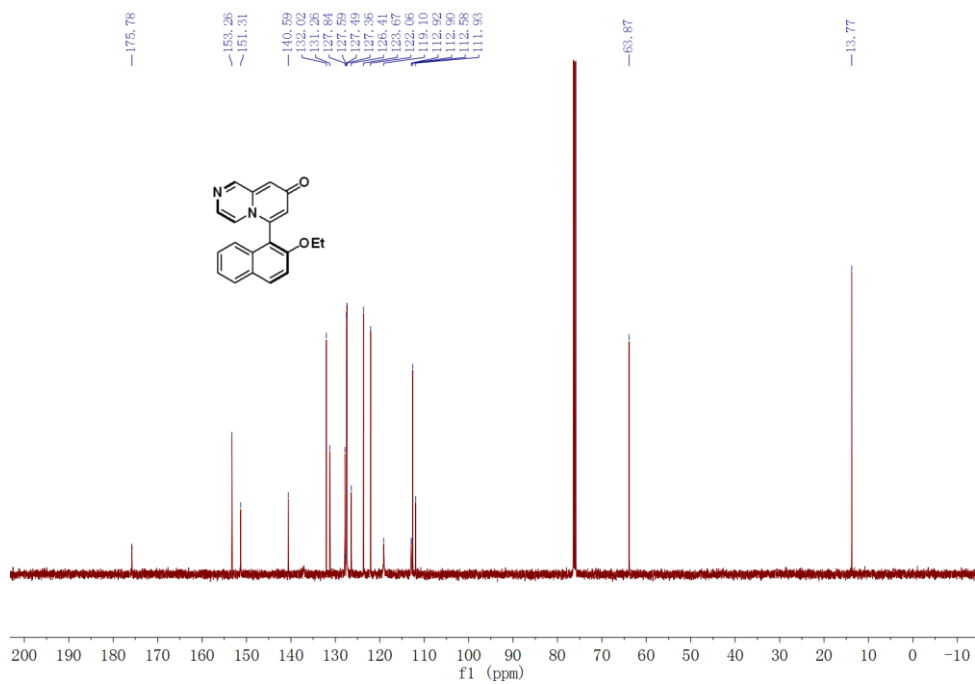

**Supplementary Fig. 110. <sup>13</sup>C NMR spectrum of 2w.**

**2x**, 4-(2-ethoxynaphthalen-1-yl)-7-(4-((((3*aS*,5*aR*,8*aR*,8*bS*)-2,2,7,7-Tetramethyltetrahydro-3*aH*-bis([1,3]dioxolo)[4,5-*b*:4',5'-*d*]pyran-3*a*-yl)methoxy)methyl)phenyl)-2*H*-quinolizin-2-one

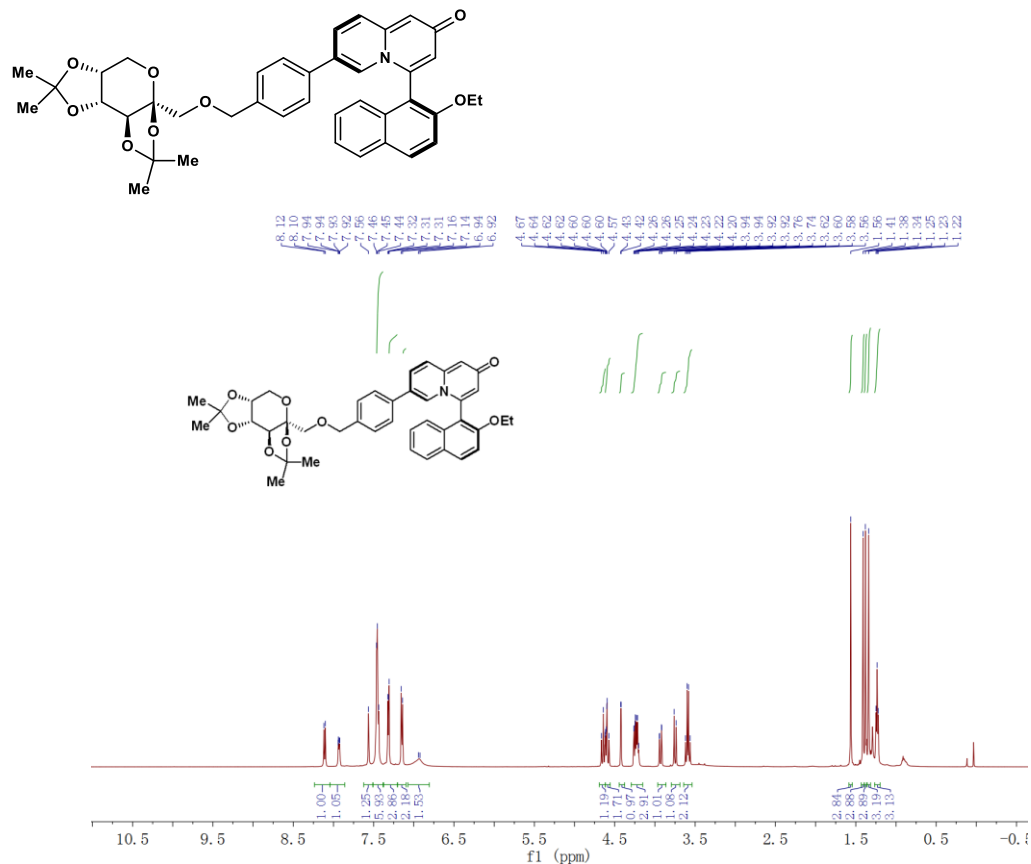

**Supplementary Fig. 111. <sup>1</sup>H NMR spectrum of 2x.**

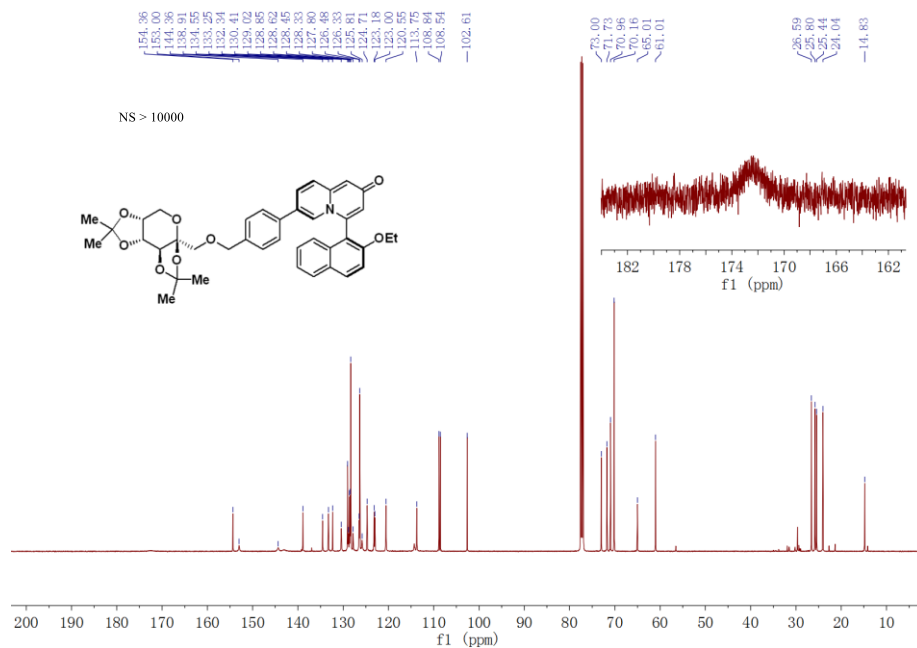

**Supplementary Fig. 112. <sup>13</sup>C NMR spectrum of 2x.**



**2z**, 4-(2-ethoxynaphthalen-1-yl)-7-(4-((((1*R*,2*S*,5*R*)-2-isopropyl-5-methyl -cyclohexyl)oxy)methyl)-phenyl)-2*H*-quinolizin-2-one

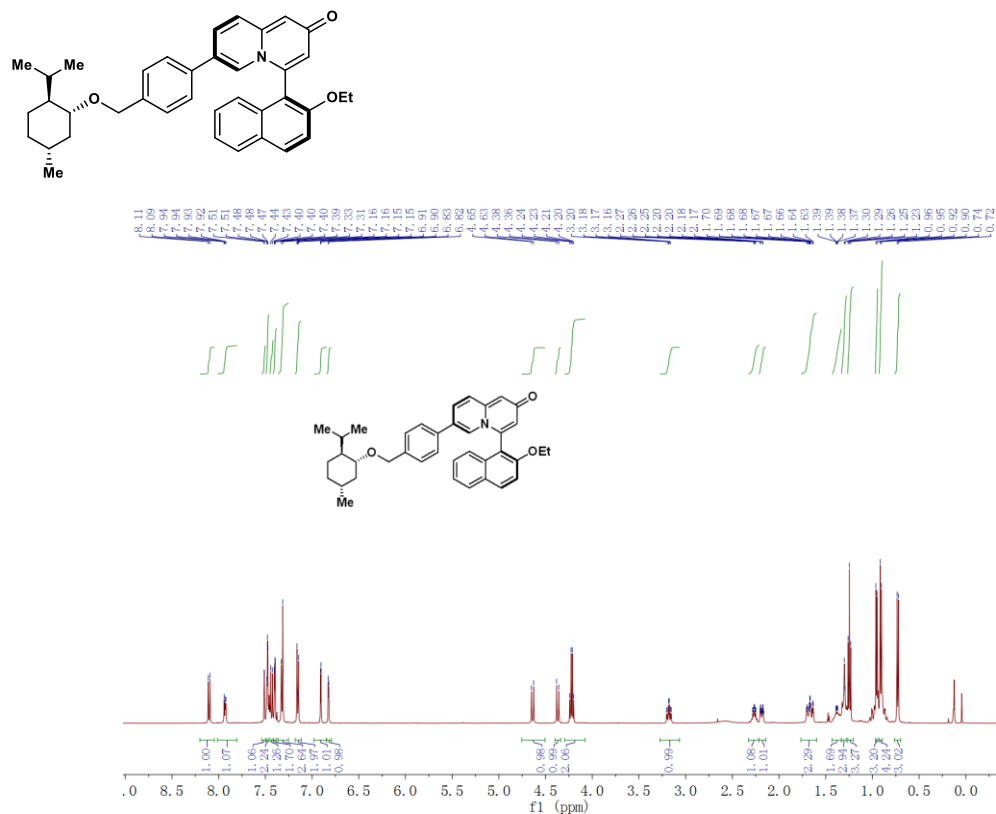

Supplementary Fig. 115. <sup>1</sup>H NMR spectrum of **2z**.

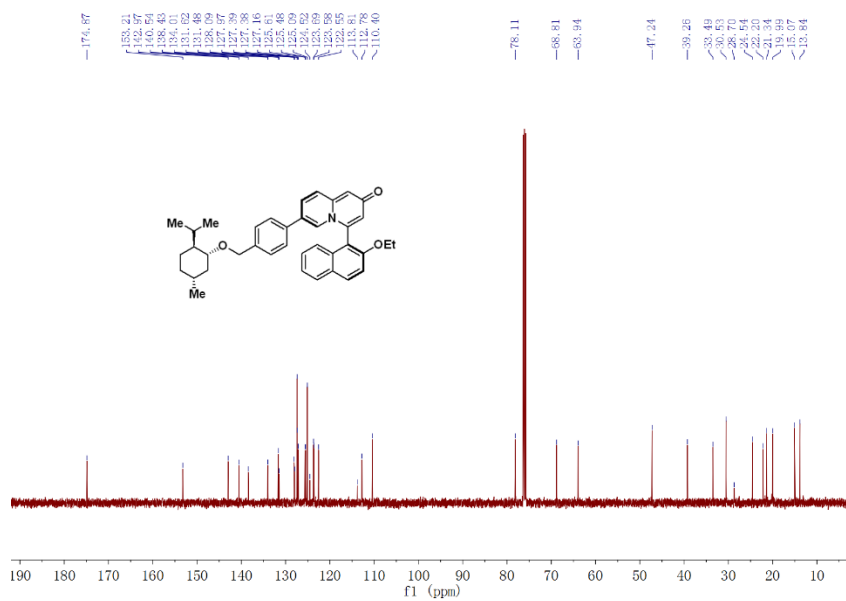

Supplementary Fig. 116. <sup>13</sup>C NMR spectrum of **2z**.

3, di-*tert*-butyl 1-(4-(2-ethoxynaphthalen-1-yl)-2-oxo-2*H*-quinolizin-1-yl)-hydrazine-1,2-dicarboxylate

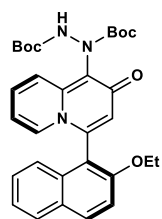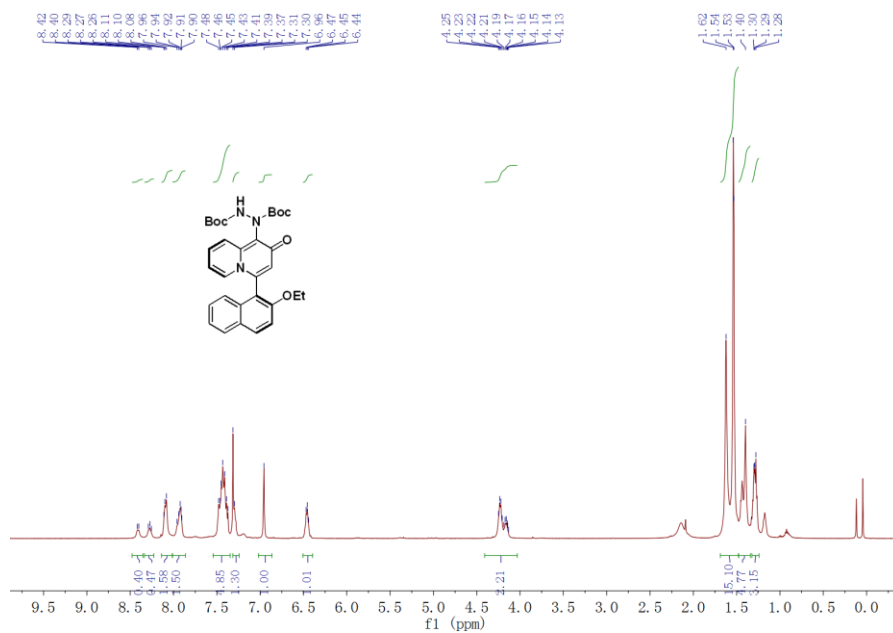

Supplementary Fig. 117. <sup>1</sup>H NMR spectrum of 3.

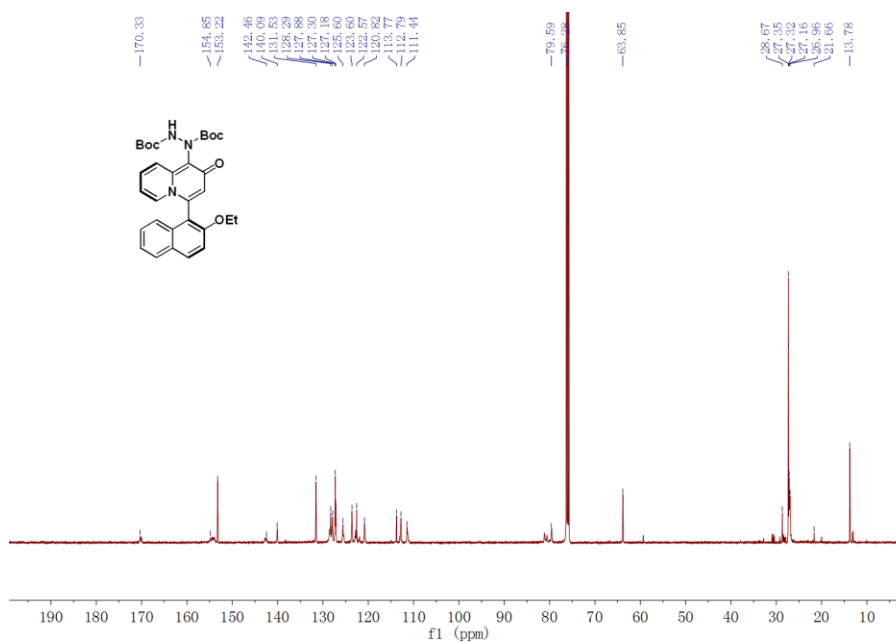

Supplementary Fig. 118. <sup>13</sup>C NMR spectrum of 3.



5, 4-(2-((diphenylphosphanyl)oxy)naphthalen-1-yl)-2H-quinolizin-2-one

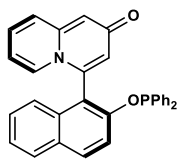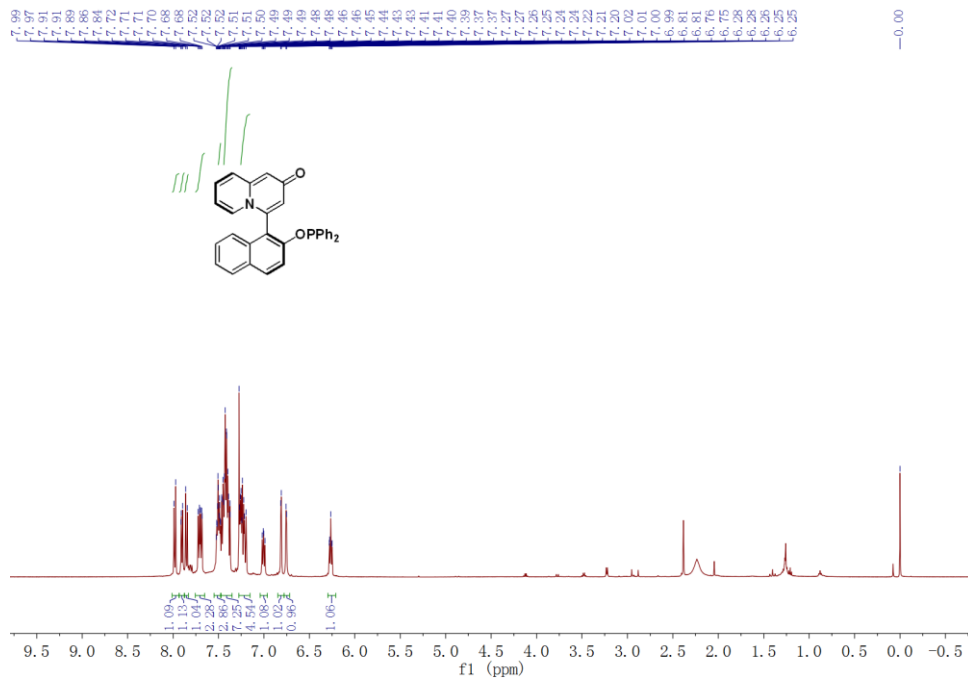

Supplementary Fig. 121. <sup>1</sup>H NMR spectrum of 5.

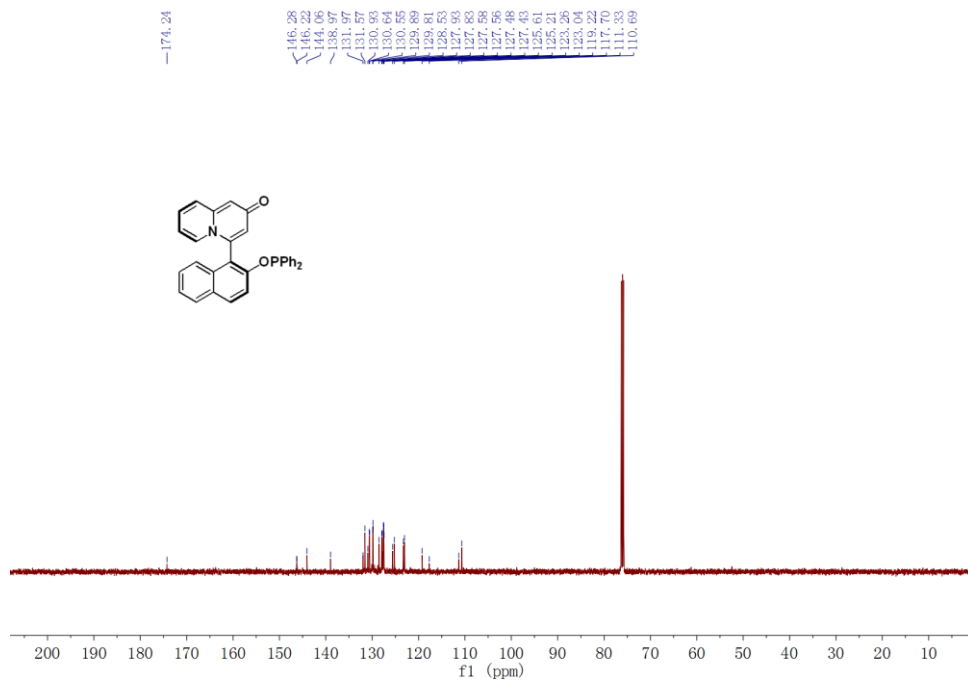

Supplementary Fig. 122. <sup>13</sup>C NMR spectrum of 5.

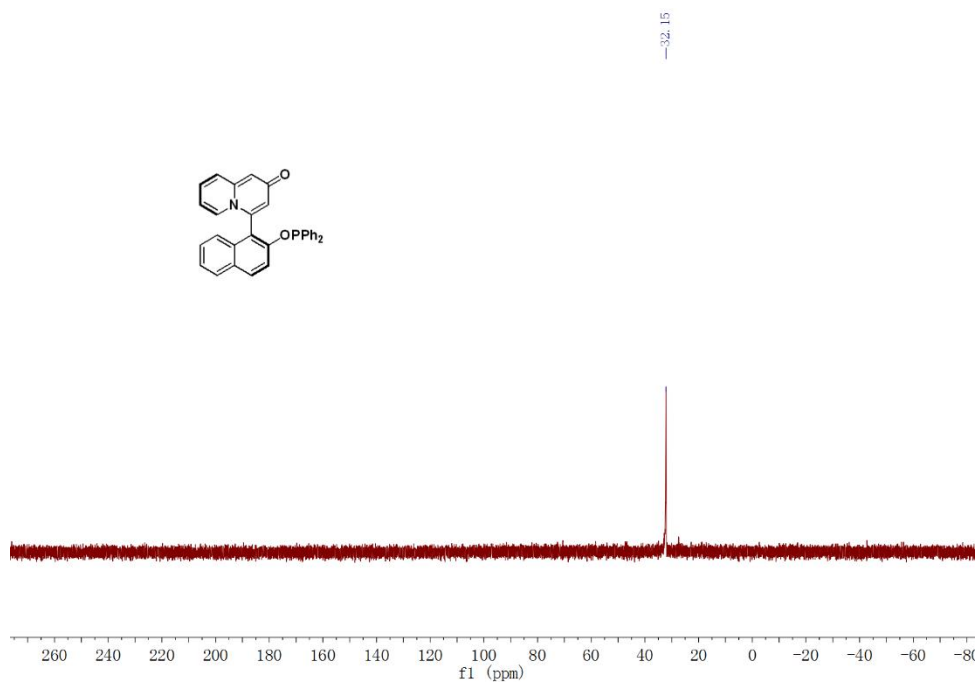

**Supplementary Fig. 123. <sup>31</sup>P NMR spectrum of 5.**

**6, 1-(2-oxo-2*H*-quinolizin-4-yl)naphthalen-2-yl trifluoromethanesulfonate**

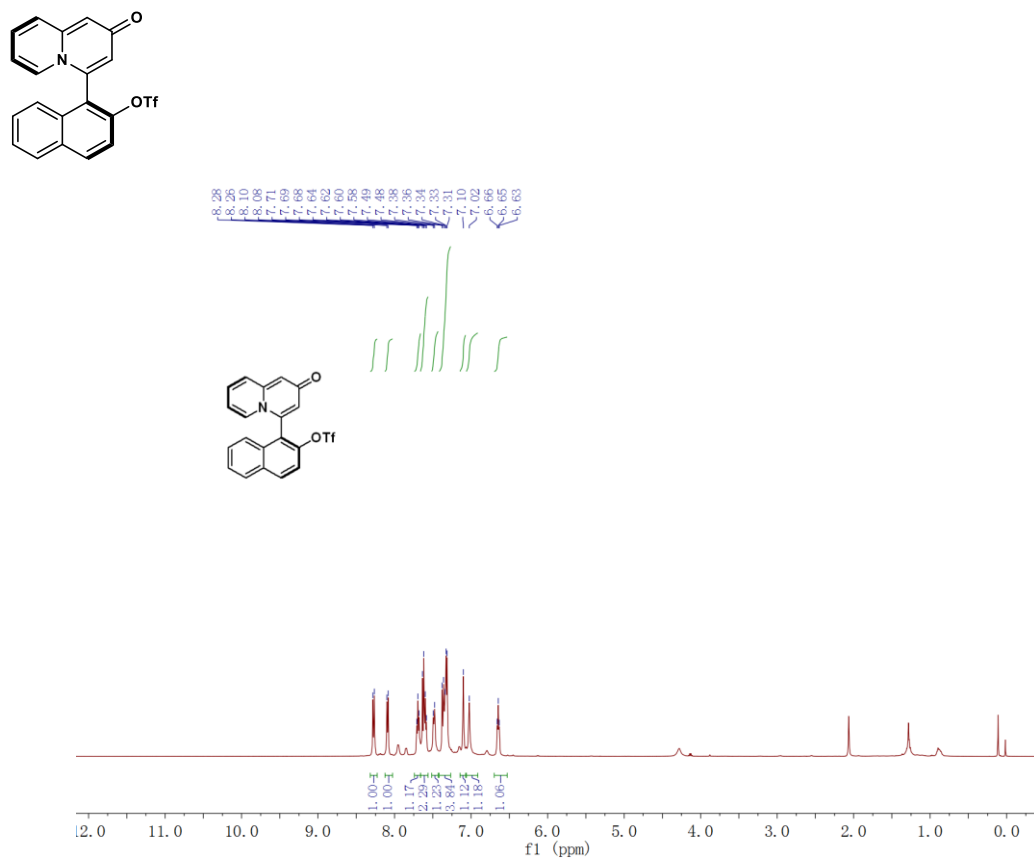

**Supplementary Fig. 124. <sup>1</sup>H NMR spectrum of 6.**



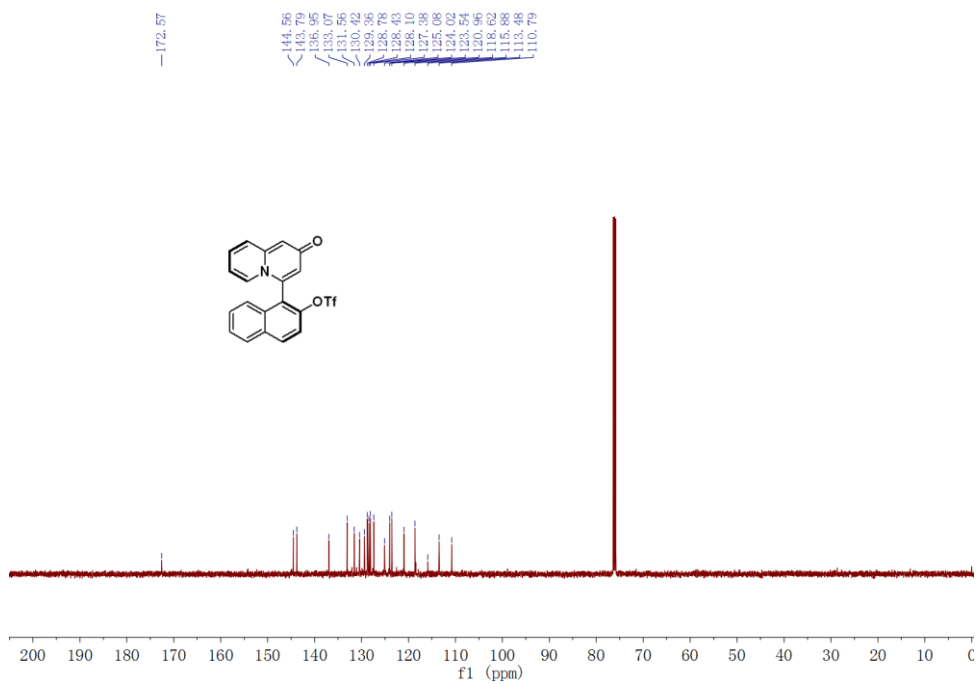

Supplementary Fig. 125.  $^{13}\text{C}$  NMR spectrum of 6.

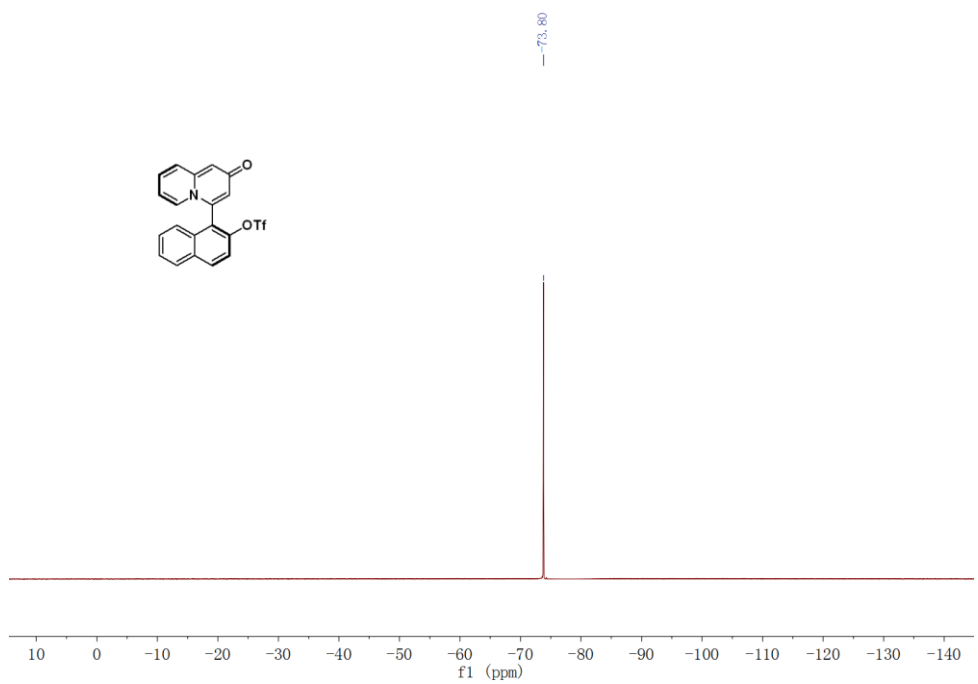

Supplementary Fig. 126.  $^{19}\text{F}$  NMR spectrum of 6.

7, 4-(2-(benzylamino)naphthalen-1-yl)-2H-quinolizin-2-one

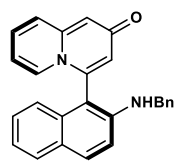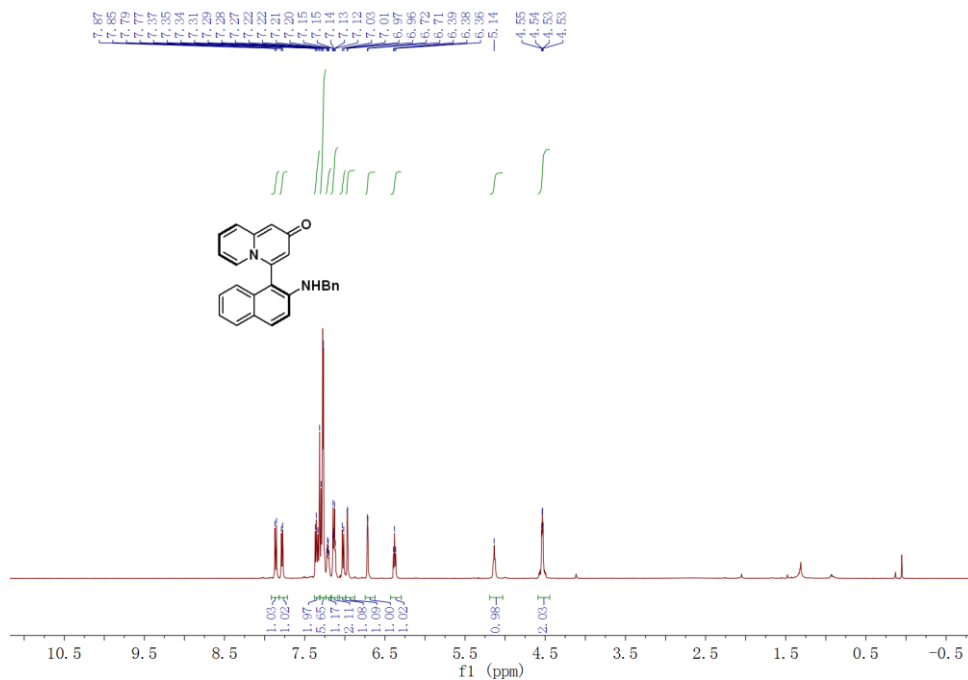

Supplementary Fig. 127. <sup>1</sup>H NMR spectrum of 7.

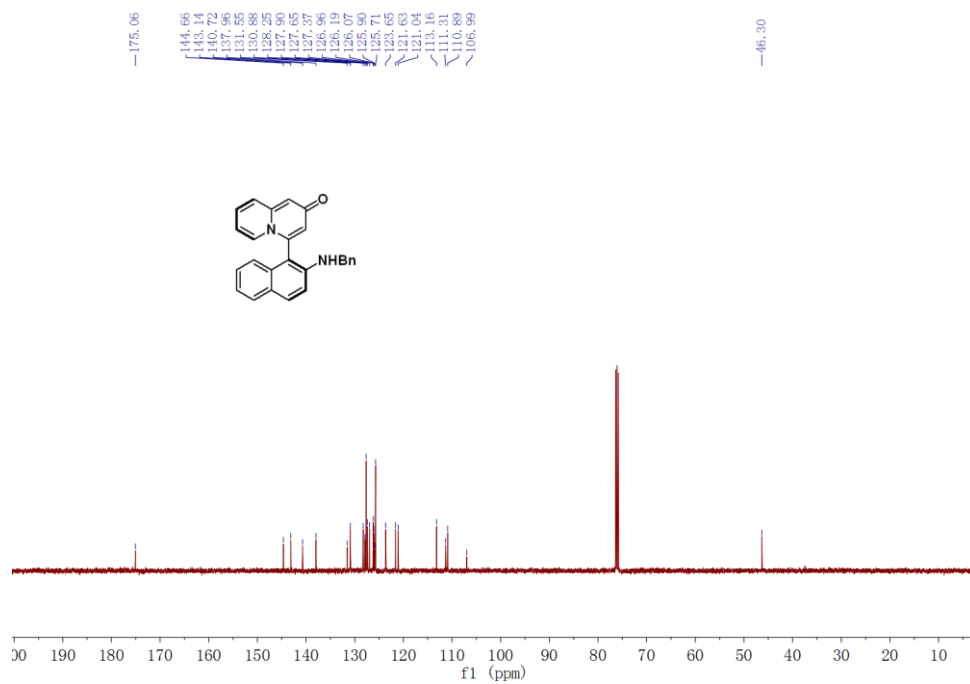

Supplementary Fig. 128. <sup>13</sup>C NMR spectrum of 7.

8, 4-(2-aminonaphthalen-1-yl)-6,7,8,9-tetrahydro-2H-quinolizin-2-one

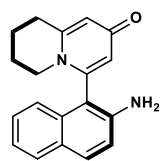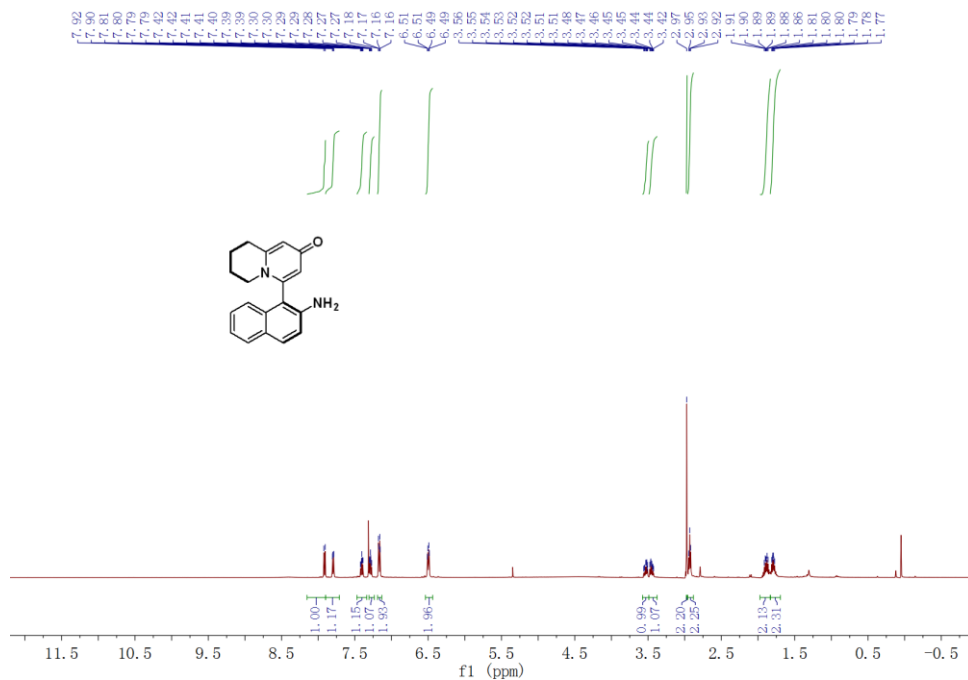

Supplementary Fig. 129. <sup>1</sup>H NMR spectrum of 8.

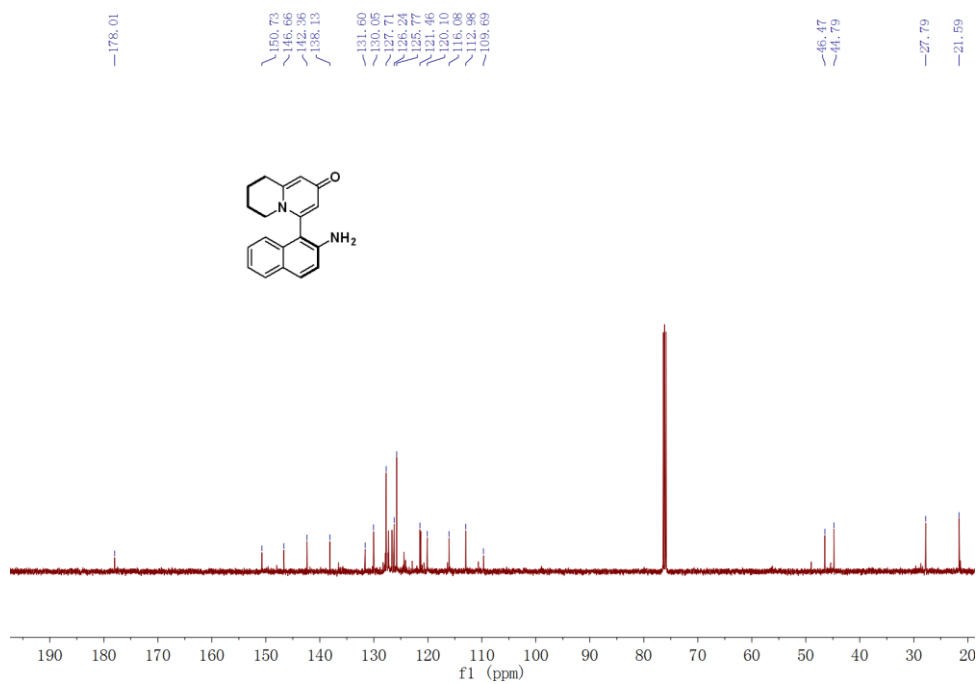

Supplementary Fig. 130. <sup>13</sup>C NMR spectrum of 8.

9, 4-(2-aminonaphthalen-1-yl)-2H-quinolizin-2-one

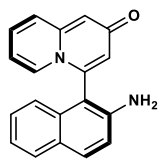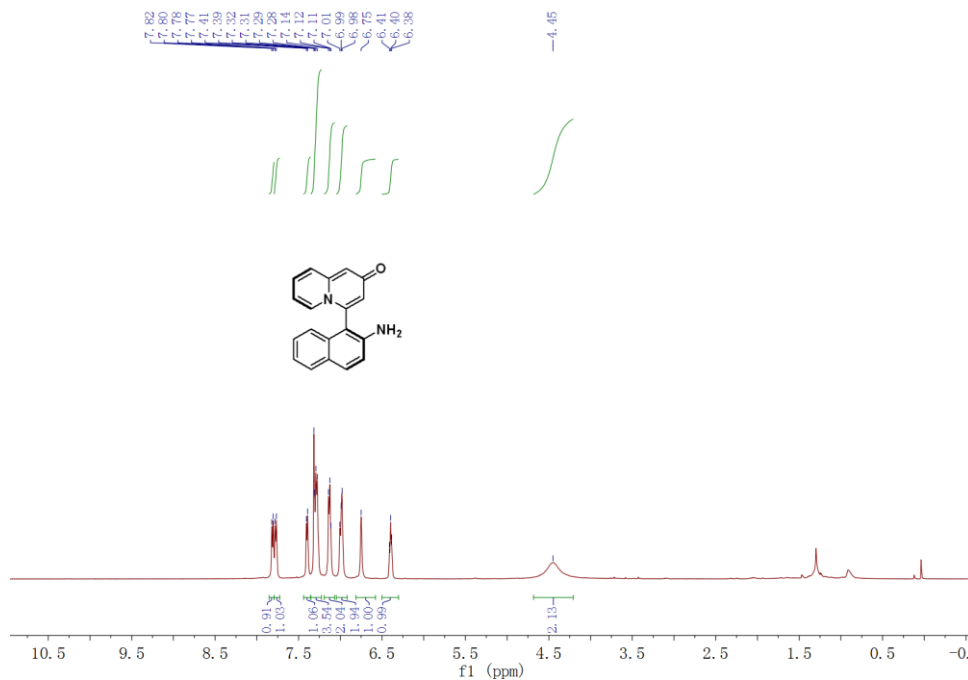

Supplementary Fig. 131. <sup>1</sup>H NMR spectrum of 9.

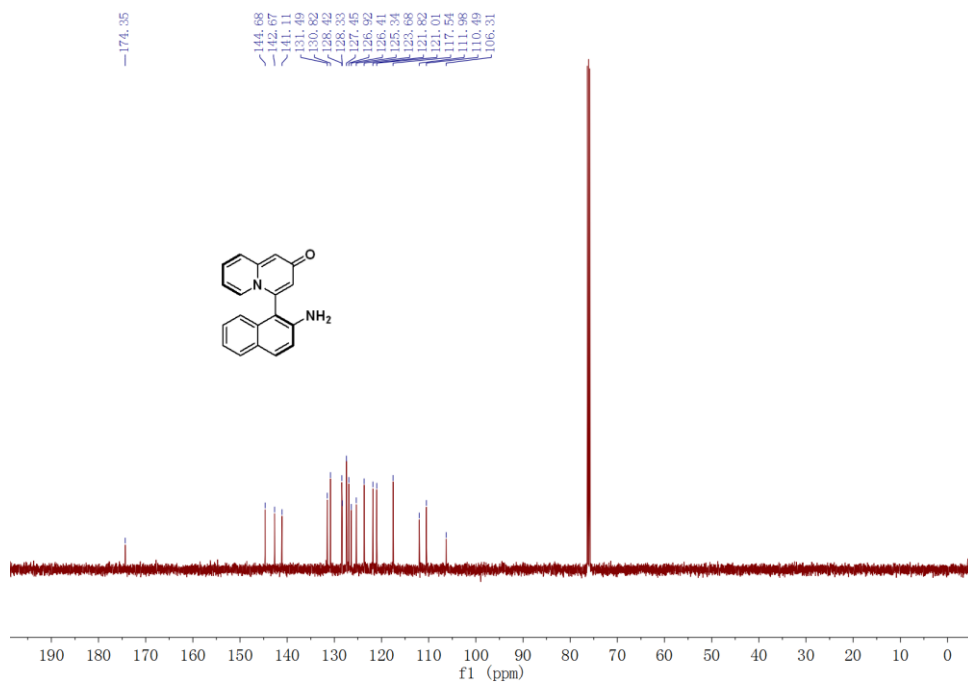

Supplementary Fig. 132. <sup>13</sup>C NMR spectrum of 9.

**10**, 1-(3,5-bis(trifluoromethyl)phenyl)-3-(1-(2-oxo-6,7,8,9-tetrahydro-2H-quinolizin-4-yl)naphthalen-2-yl)thiourea

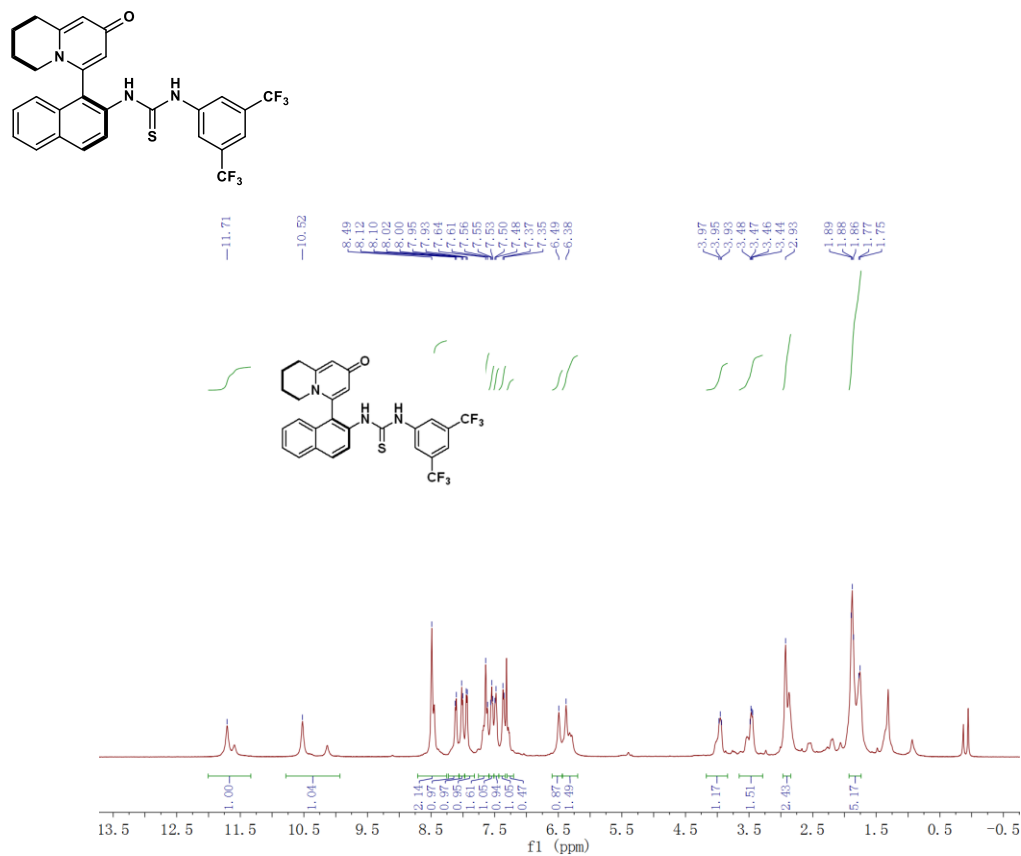

**Supplementary Fig. 133. <sup>1</sup>H NMR spectrum of 10.**

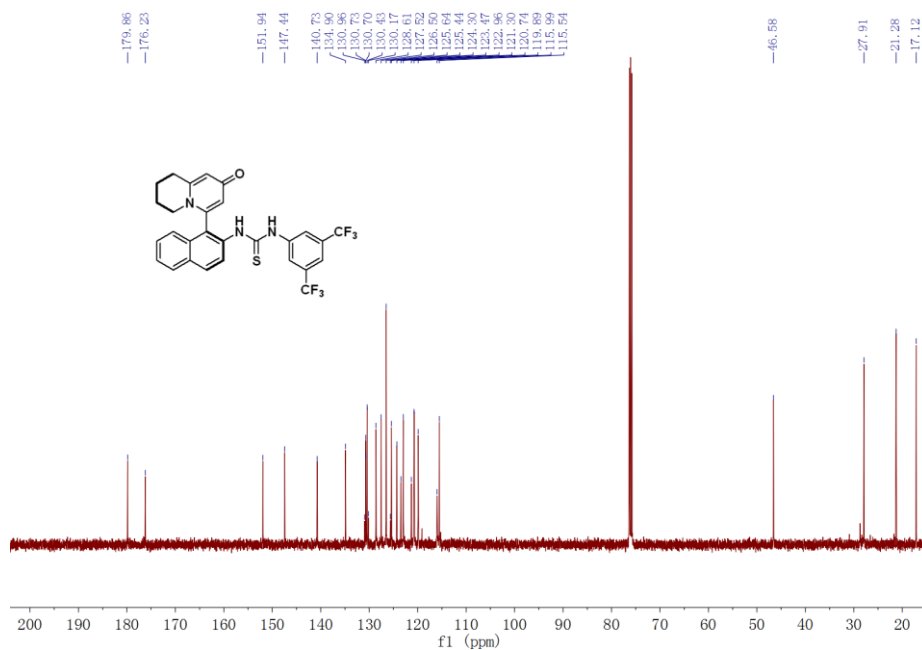

**Supplementary Fig. 134. <sup>13</sup>C NMR spectrum of 10.**

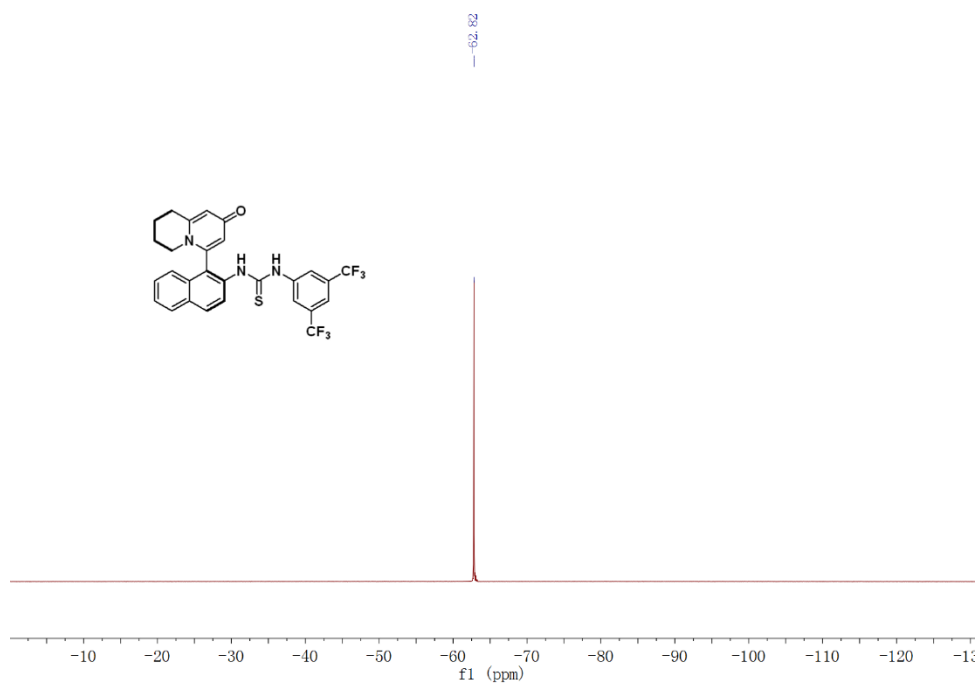

**Supplementary Fig. 135.  $^{19}\text{F}$  NMR spectrum of 10.**

**11**, 1-(3,5-bis(trifluoromethyl)phenyl)-3-(1-(2-oxo-2H-quinolizin-4-yl)naphthalen-2-yl)thiourea

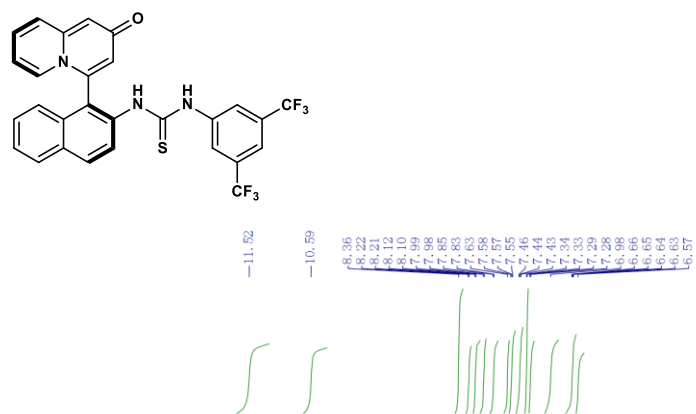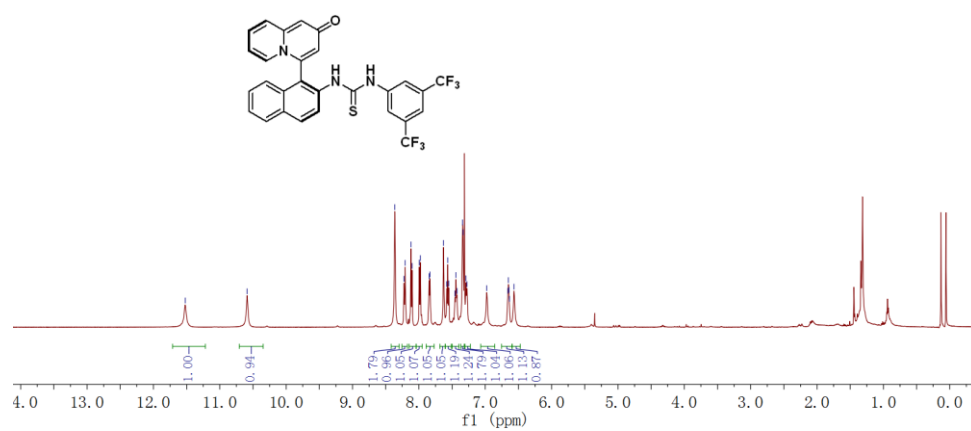

**Supplementary Fig. 136.**  $^1\text{H}$  NMR spectrum of **11**.

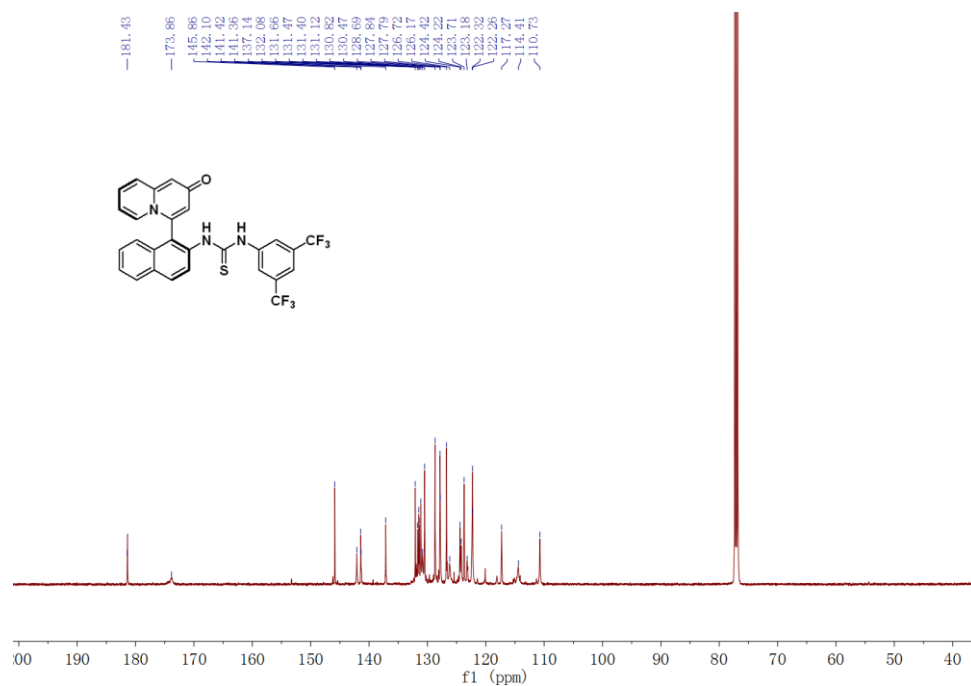

**Supplementary Fig. 137.**  $^{13}\text{C}$  NMR spectrum of **11**.

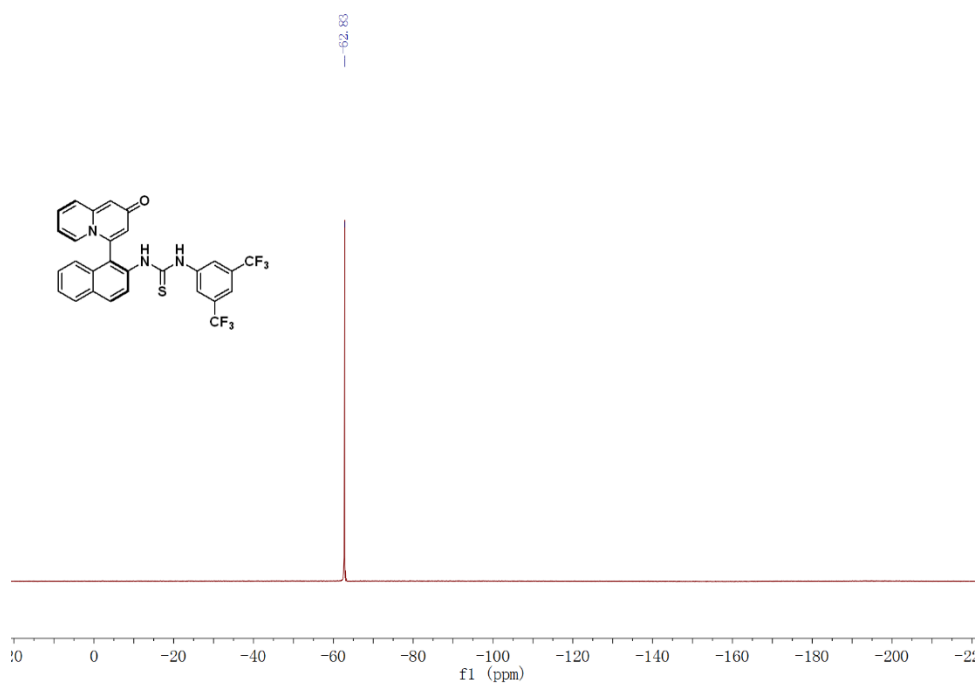

**Supplementary Fig. 138.  $^{19}\text{F}$  NMR spectrum of 11.**



## HPLC data

**2a**, 4-(2-methoxynaphthalen-1-yl)-2*H*-quinolizin-2-one

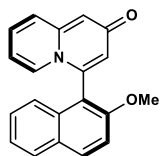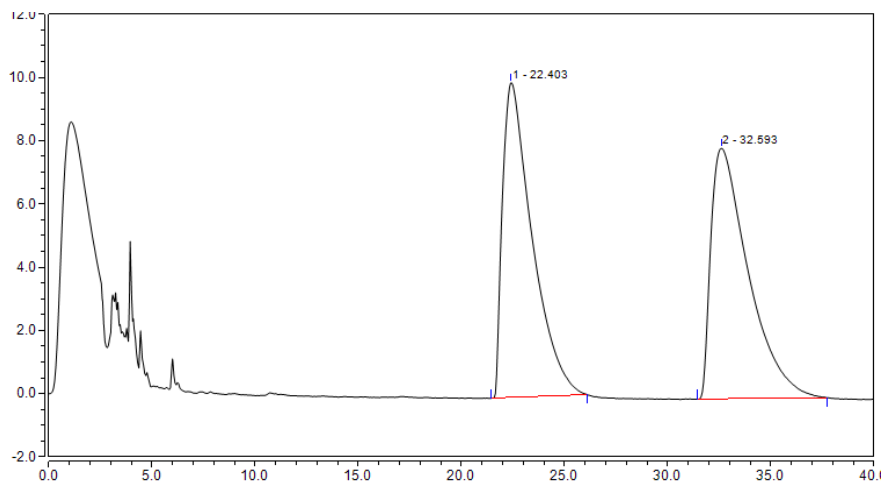

| Ret. Time (min) | Area (mAU*min) | Height (mAU)  | Area %        | Height %      |
|-----------------|----------------|---------------|---------------|---------------|
| 22.403          | 16.561         | 9.963         | 49.89         | 55.69         |
| 32.593          | 16.635         | 7.926         | 50.11         | 44.31         |
|                 | <b>33.196</b>  | <b>17.889</b> | <b>100.00</b> | <b>100.00</b> |

**Supplementary Fig. 139. HPLC spectrum of racemic 2a.**

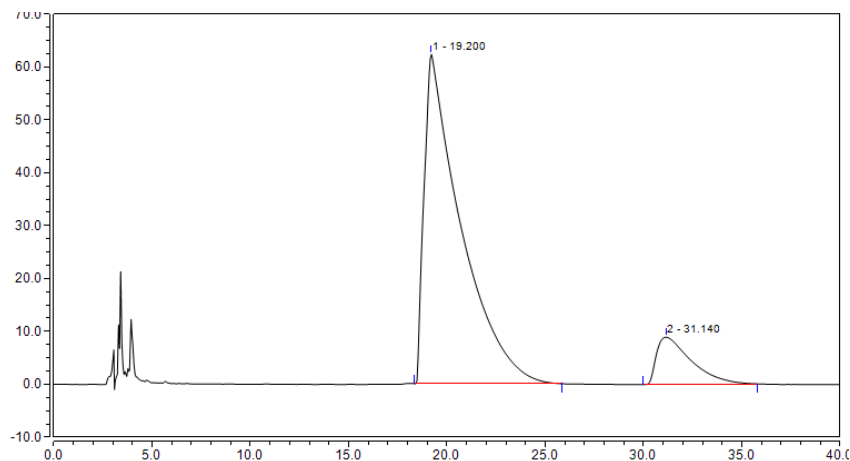

| Ret. Time (min) | Area (mAU*min) | Height (mAU)  | Area %        | Height %      |
|-----------------|----------------|---------------|---------------|---------------|
| 19.200          | 133.998        | 62.326        | 88.06         | 87.46         |
| 31.140          | 18.175         | 8.938         | 11.94         | 12.54         |
|                 | <b>152.173</b> | <b>71.264</b> | <b>100.00</b> | <b>100.00</b> |

**Supplementary Fig. 140. HPLC spectrum of chiral 2a.**

**2b**, 4-(2-ethoxynaphthalen-1-yl)-2*H*-quinolizin-2-one

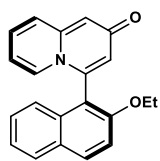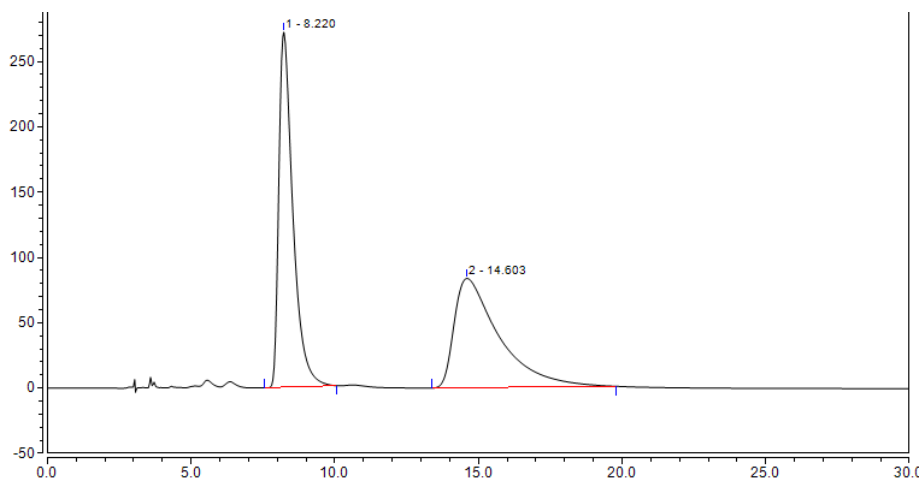

| Ret. Time (min) | Area (mAU*min) | Height (mAU)   | Area %        | Height %      |
|-----------------|----------------|----------------|---------------|---------------|
| 8.220           | 154.581        | 271.850        | 50.43         | 76.44         |
| 14.603          | 151.962        | 83.785         | 49.57         | 23.56         |
|                 | <b>306.544</b> | <b>355.635</b> | <b>100.00</b> | <b>100.00</b> |

Supplementary Fig. 141. HPLC spectrum of racemic 2b.

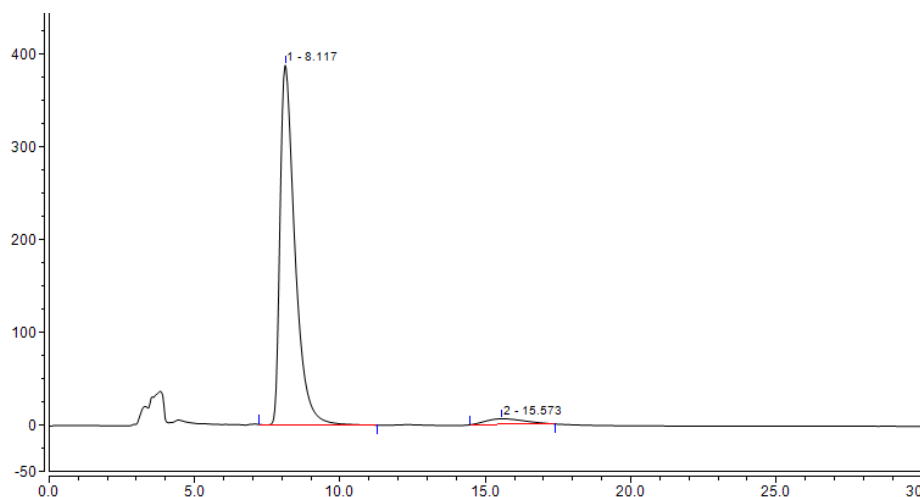

| Ret. Time (min) | Area (mAU*min) | Height (mAU)   | Area %        | Height %      |
|-----------------|----------------|----------------|---------------|---------------|
| 8.117           | 228.832        | 387.316        | 96.00         | 98.44         |
| 15.573          | 9.541          | 6.122          | 4.00          | 1.56          |
|                 | <b>238.373</b> | <b>393.439</b> | <b>100.00</b> | <b>100.00</b> |

Supplementary Fig. 142. HPLC spectrum of chiral 2b.

**2c**, 4-(6-bromo-2-ethoxynaphthalen-1-yl)-2*H*-quinolizin-2-one

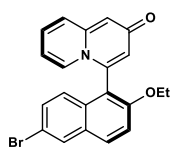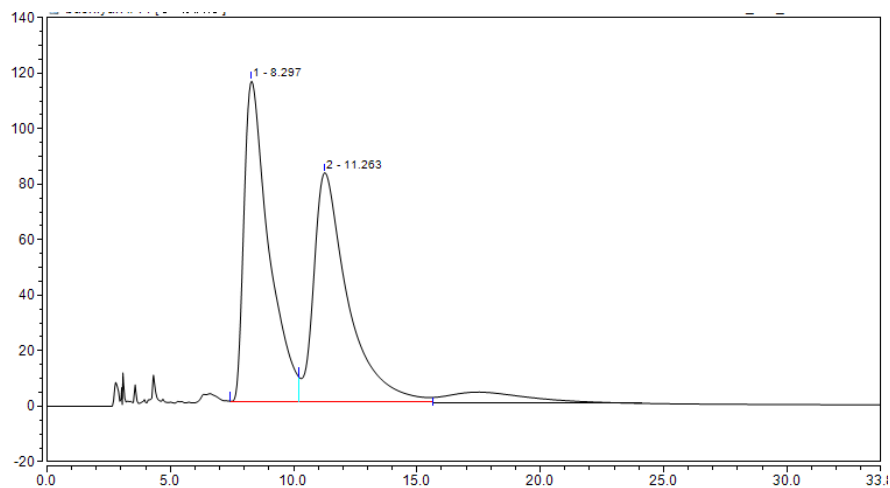

| Ret. Time (min) | Area (mAU*min) | Height (mAU)   | Area %        | Height %      |
|-----------------|----------------|----------------|---------------|---------------|
| 8.297           | 133.578        | 115.404        | 50.29         | 58.30         |
| 11.263          | 132.035        | 82.533         | 49.71         | 41.70         |
|                 | <b>265.614</b> | <b>197.937</b> | <b>100.00</b> | <b>100.00</b> |

Supplementary Fig. 143. HPLC spectrum of racemic **2c**.

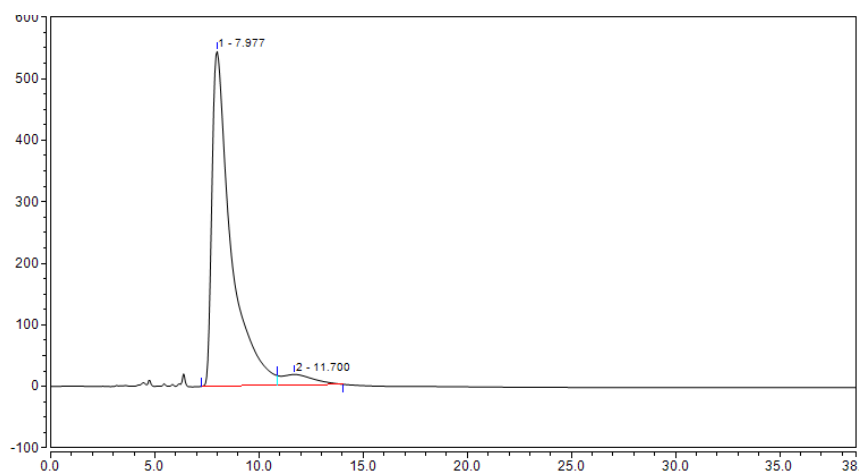

| Ret. Time (min) | Area (mAU*min) | Height (mAU)   | Area %        | Height %      |
|-----------------|----------------|----------------|---------------|---------------|
| 7.977           | 574.678        | 544.487        | 94.87         | 96.94         |
| 11.700          | 31.051         | 17.165         | 5.13          | 3.06          |
|                 | <b>605.729</b> | <b>561.652</b> | <b>100.00</b> | <b>100.00</b> |

Supplementary Fig. 144. HPLC spectrum of chiral **2c**.

**2d**, 4-(7-bromo-2-ethoxynaphthalen-1-yl)-2*H*-quinolizin-2-one

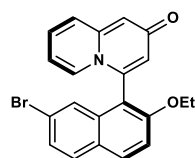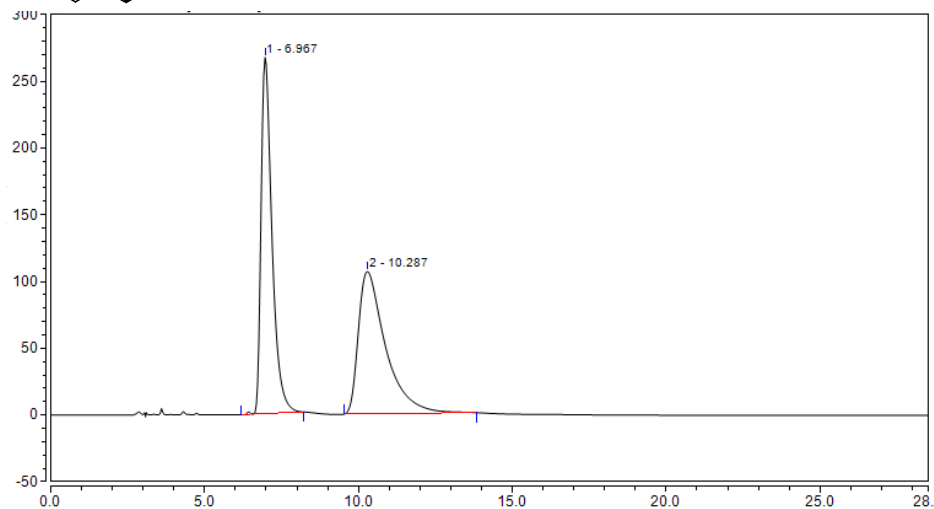

| Ret. Time (min) | Area (mAU*min) | Height (mAU)   | Area %        | Height %      |
|-----------------|----------------|----------------|---------------|---------------|
| 6.967           | 109.682        | 266.955        | 50.11         | 71.45         |
| 10.287          | 109.185        | 106.685        | 49.89         | 28.55         |
|                 | <b>218.866</b> | <b>373.640</b> | <b>100.00</b> | <b>100.00</b> |

Supplementary Fig. 145. HPLC spectrum of racemic 2d.

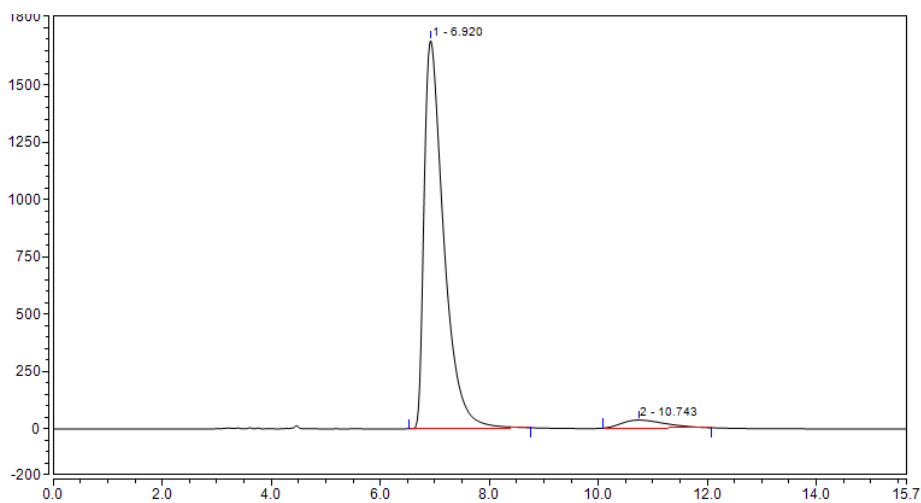

| Ret. Time (min) | Area (mAU*min) | Height (mAU)    | Area %        | Height %      |
|-----------------|----------------|-----------------|---------------|---------------|
| 6.920           | 705.916        | 1691.753        | 95.61         | 97.98         |
| 10.743          | 32.420         | 34.793          | 4.39          | 2.02          |
|                 | <b>738.336</b> | <b>1726.546</b> | <b>100.00</b> | <b>100.00</b> |

Supplementary Fig. 146. HPLC spectrum of chiral 2d.

**2e**, 4-(2-ethoxy-7-phenylnaphthalen-1-yl)-2H-quinolizin-2-one

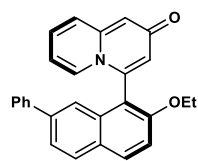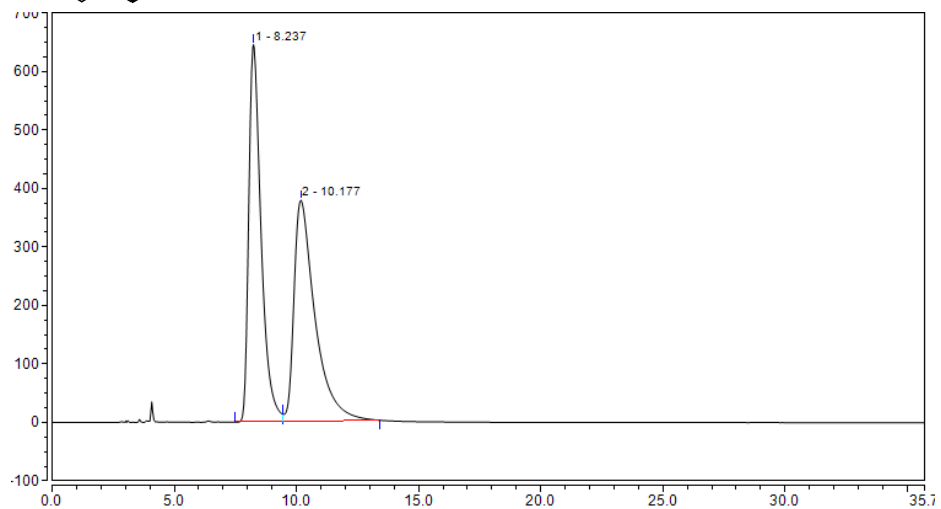

| Ret. Time (min) | Area (mAU*min) | Height (mAU)    | Area %        | Height %      |
|-----------------|----------------|-----------------|---------------|---------------|
| 8.237           | 376.680        | 645.359         | 50.00         | 63.04         |
| 10.177          | 376.615        | 378.429         | 50.00         | 36.96         |
|                 | <b>753.295</b> | <b>1023.788</b> | <b>100.00</b> | <b>100.00</b> |

**Supplementary Fig. 147. HPLC spectrum of racemic 2e.**

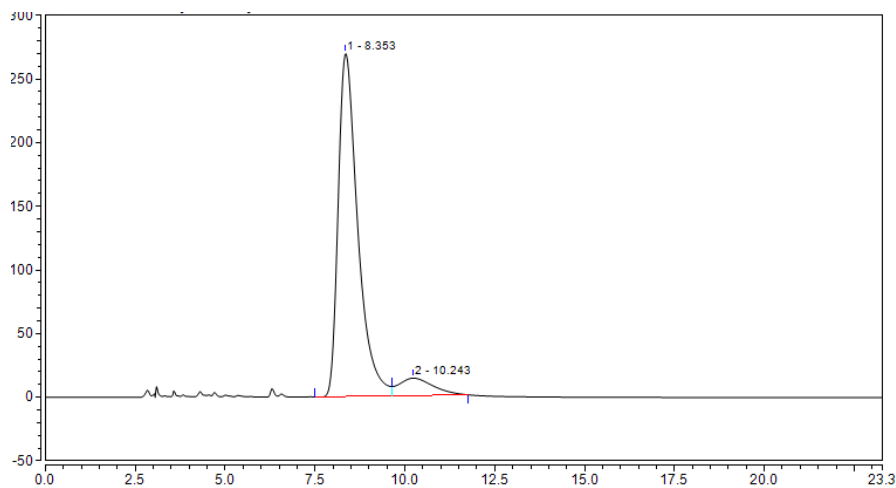

| Ret. Time (min) | Area (mAU*min) | Height (mAU)   | Area %        | Height %      |
|-----------------|----------------|----------------|---------------|---------------|
| 8.353           | 170.112        | 269.770        | 91.79         | 95.15         |
| 10.243          | 15.218         | 13.749         | 8.21          | 4.85          |
|                 | <b>185.330</b> | <b>283.519</b> | <b>100.00</b> | <b>100.00</b> |

**Supplementary Fig. 148. HPLC spectrum of chiral 2e.**

**2f**, 4-(2-ethoxy-7-(phenylethynyl)naphthalen-1-yl)-2*H*-quinolizin-2-one

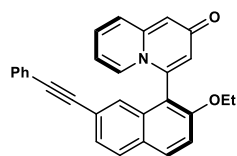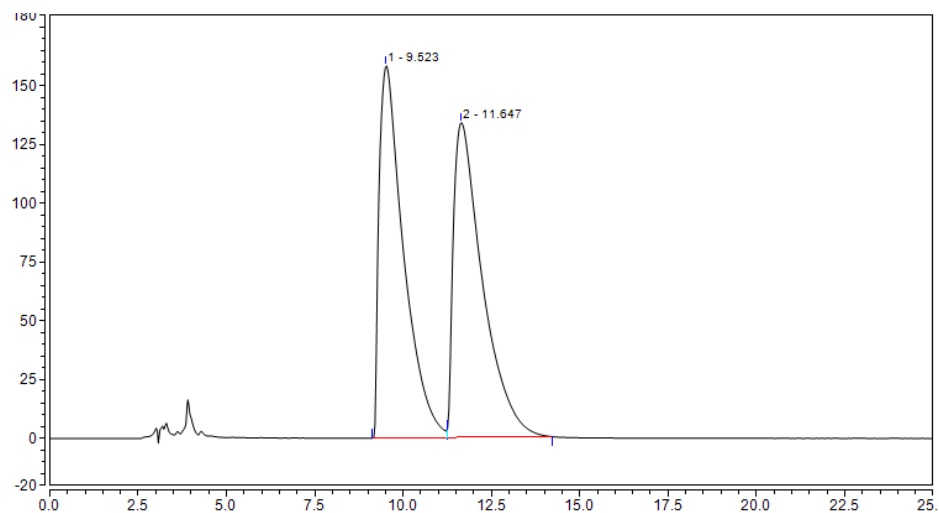

| Ret. Time (min) | Area (mAU*min) | Height (mAU)   | Area %        | Height %      |
|-----------------|----------------|----------------|---------------|---------------|
| 9.523           | 127.179        | 158.469        | 49.88         | 54.18         |
| 11.647          | 127.804        | 134.003        | 50.12         | 45.82         |
|                 | <b>254.983</b> | <b>292.472</b> | <b>100.00</b> | <b>100.00</b> |

**Supplementary Fig. 149. HPLC spectrum of racemic 2f.**

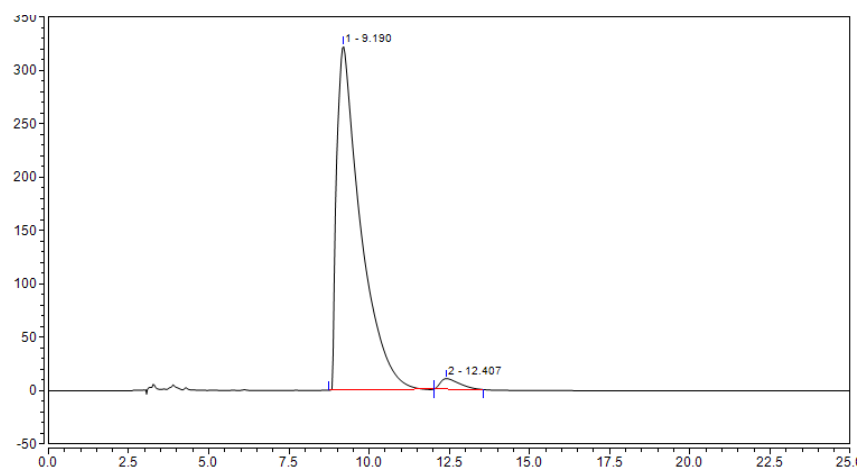

| Ret. Time (min) | Area (mAU*min) | Height (mAU)   | Area %        | Height %      |
|-----------------|----------------|----------------|---------------|---------------|
| 9.190           | 276.815        | 322.149        | 97.58         | 97.00         |
| 12.407          | 6.855          | 9.952          | 2.42          | 3.00          |
|                 | <b>283.671</b> | <b>332.101</b> | <b>100.00</b> | <b>100.00</b> |

**Supplementary Fig. 150. HPLC spectrum of chiral 2f.**

**2g**, 4-(2-((4-methoxybenzyl)oxy)naphthalen-1-yl)-2H-quinolizin-2-one

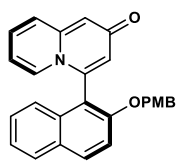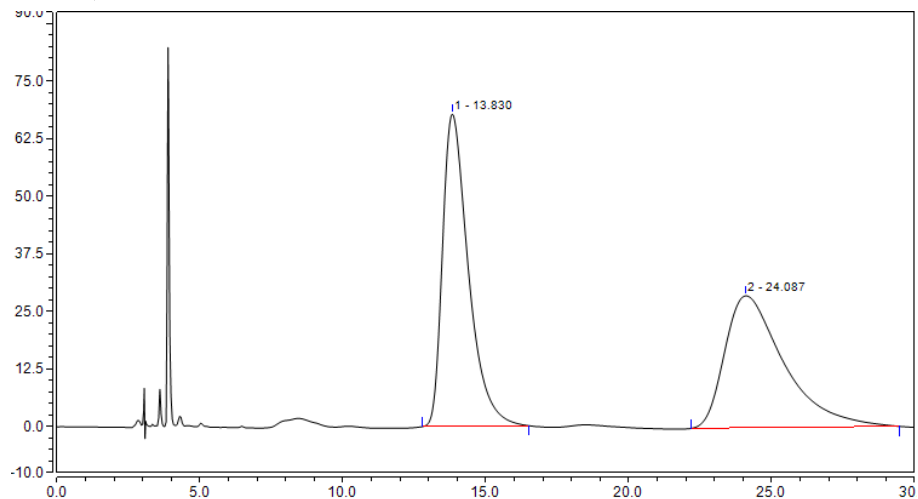

| Ret. Time (min) | Area (mAU*min) | Height (mAU)  | Area %        | Height %      |
|-----------------|----------------|---------------|---------------|---------------|
| 13.830          | 71.014         | 67.803        | 50.79         | 70.27         |
| 24.087          | 68.808         | 28.686        | 49.21         | 29.73         |
|                 | <b>139.822</b> | <b>96.489</b> | <b>100.00</b> | <b>100.00</b> |

**Supplementary Fig. 151. HPLC spectrum of racemic 2g.**

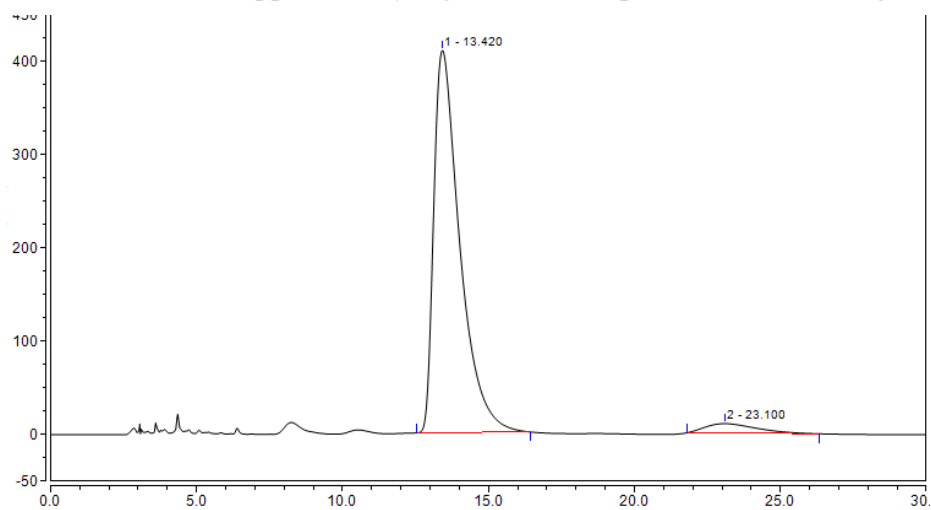

| Ret. Time (min) | Area (mAU*min) | Height (mAU)   | Area %        | Height %      |
|-----------------|----------------|----------------|---------------|---------------|
| 13.420          | 423.151        | 410.141        | 95.35         | 97.59         |
| 23.100          | 20.645         | 10.117         | 4.65          | 2.41          |
|                 | <b>443.796</b> | <b>420.258</b> | <b>100.00</b> | <b>100.00</b> |

**Supplementary Fig. 152. HPLC spectrum of chiral 2g.**

**2h**, 4-(2-(dimethylamino)naphthalen-1-yl)-2H-quinolizin-2-one

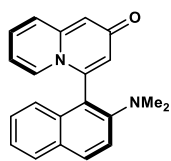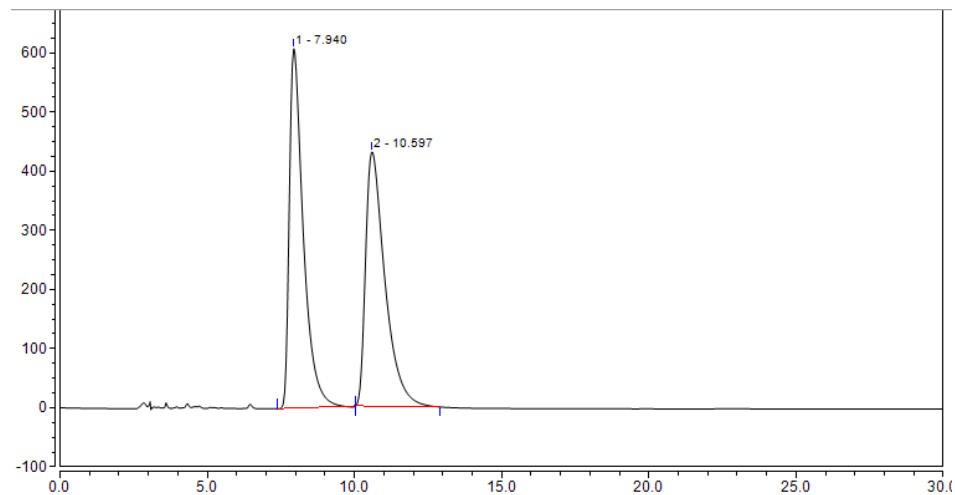

| Ret. Time (min) | Area (mAU*min) | Height (mAU)    | Area %        | Height %      |
|-----------------|----------------|-----------------|---------------|---------------|
| 7.940           | 333.945        | 608.182         | 50.51         | 58.54         |
| 10.597          | 327.255        | 430.787         | 49.49         | 41.46         |
|                 | <b>661.200</b> | <b>1038.969</b> | <b>100.00</b> | <b>100.00</b> |

Supplementary Fig. 153. HPLC spectrum of racemic 2h.

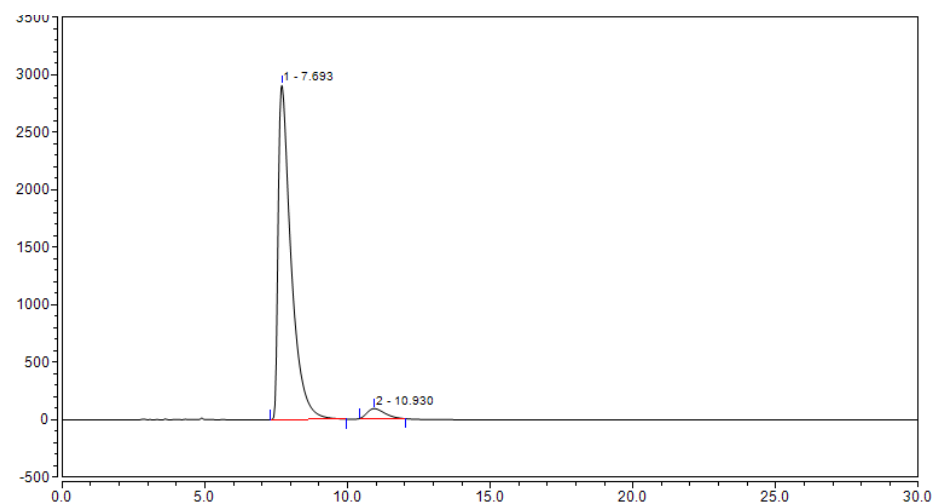

| Ret. Time (min) | Area (mAU*min)  | Height (mAU)    | Area %        | Height %      |
|-----------------|-----------------|-----------------|---------------|---------------|
| 7.693           | 1523.968        | 2907.582        | 96.20         | 97.16         |
| 10.930          | 60.133          | 85.017          | 3.80          | 2.84          |
|                 | <b>1584.101</b> | <b>2992.599</b> | <b>100.00</b> | <b>100.00</b> |

Supplementary Fig. 154. HPLC spectrum of chiral 2h.



**2i**, 4-(2-(dibenzylamino)naphthalen-1-yl)-2*H*-quinolizin-2-one

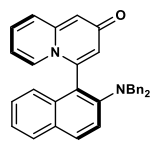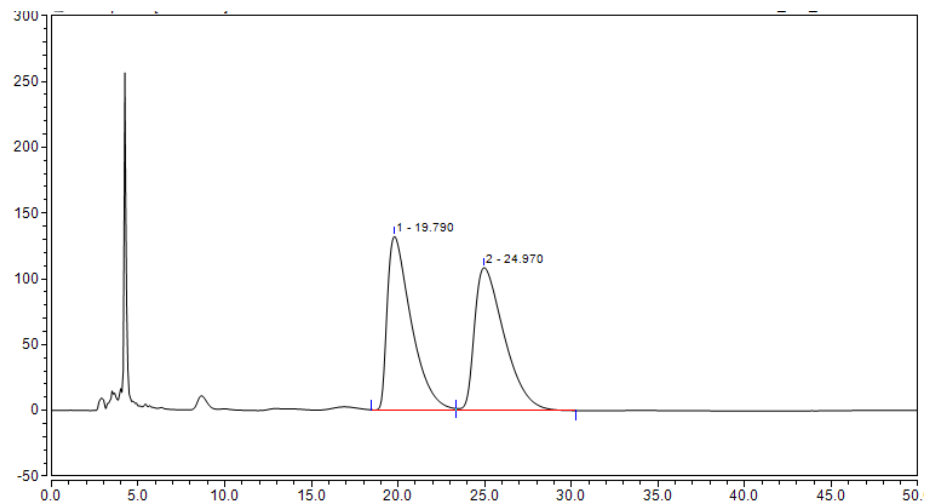

| Ret. Time<br>(min) | Area<br>(mAU*min) | Height<br>(mAU) | Area<br>%     | Height<br>%   |
|--------------------|-------------------|-----------------|---------------|---------------|
| 19.790             | 211.241           | 131.896         | 49.52         | 54.87         |
| 24.970             | 215.297           | 108.462         | 50.48         | 45.13         |
|                    | <b>426.538</b>    | <b>240.358</b>  | <b>100.00</b> | <b>100.00</b> |

Supplementary Fig. 155. HPLC spectrum of racemic 2i.

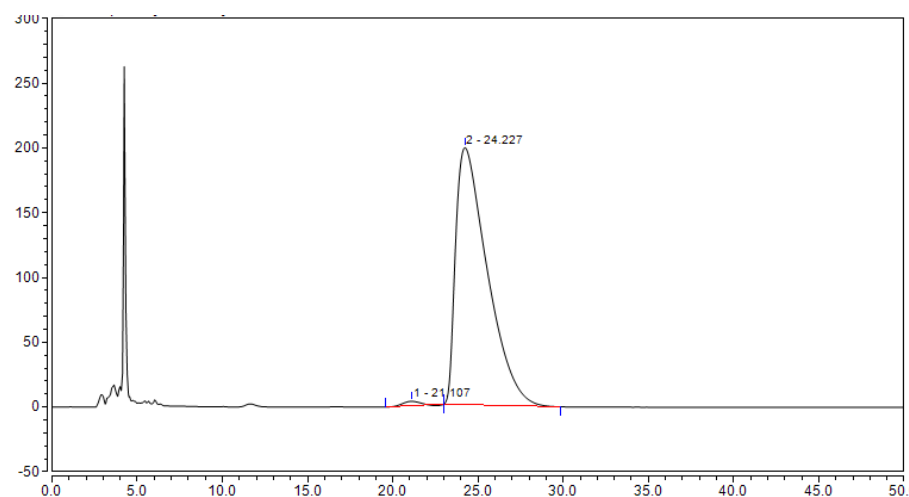

| Ret. Time<br>(min) | Area<br>(mAU*min) | Height<br>(mAU) | Area<br>%     | Height<br>%   |
|--------------------|-------------------|-----------------|---------------|---------------|
| 21.107             | 3.522             | 3.429           | 0.82          | 1.70          |
| 24.227             | 427.313           | 198.465         | 99.18         | 98.30         |
|                    | <b>430.835</b>    | <b>201.894</b>  | <b>100.00</b> | <b>100.00</b> |

Supplementary Fig. 156. HPLC spectrum of chiral 2i.

**2j**, 4-(2-methylnaphthalen-1-yl)-2H-quinolizin-2-one

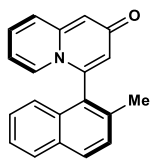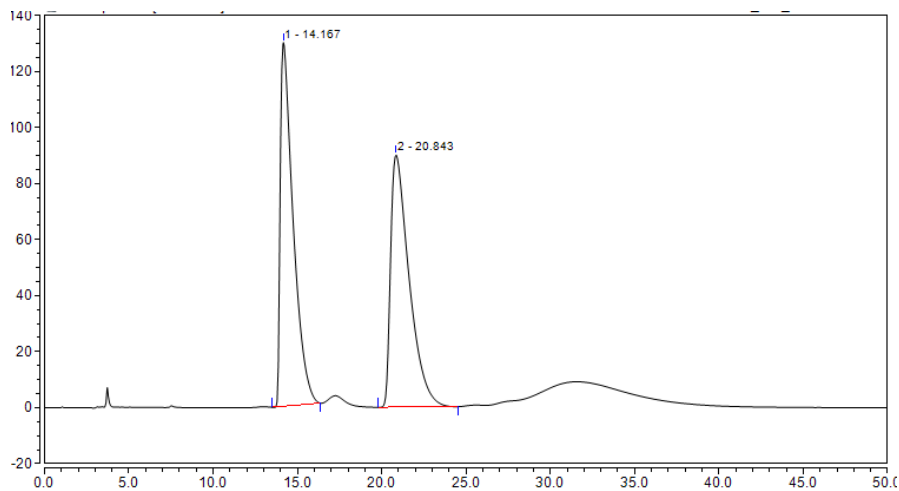

| Ret. Time (min) | Area (mAU*min) | Height (mAU)   | Area %        | Height %      |
|-----------------|----------------|----------------|---------------|---------------|
| 14.167          | 115.138        | 129.962        | 50.10         | 59.04         |
| 20.843          | 114.667        | 90.147         | 49.90         | 40.96         |
|                 | <b>229.805</b> | <b>220.109</b> | <b>100.00</b> | <b>100.00</b> |

Supplementary Fig. 157. HPLC spectrum of racemic 2j.

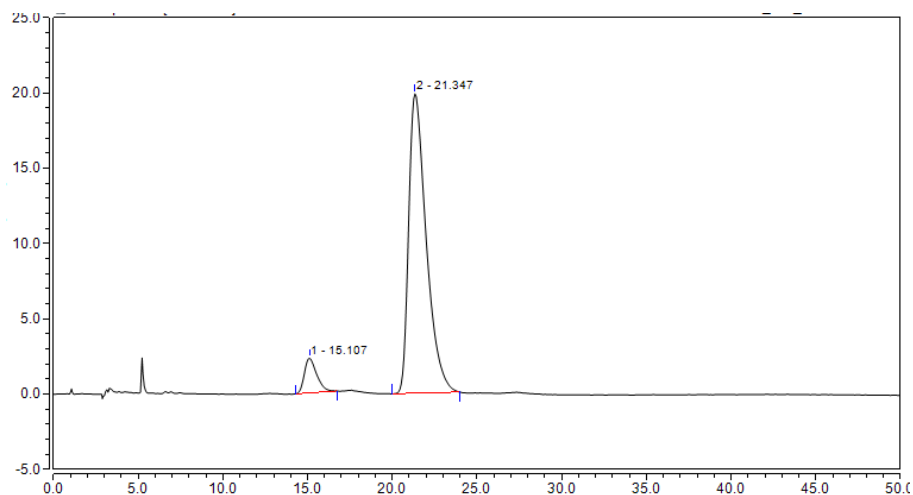

| Ret. Time (min) | Area (mAU*min) | Height (mAU)  | Area %        | Height %      |
|-----------------|----------------|---------------|---------------|---------------|
| 15.107          | 1.953          | 2.307         | 7.58          | 10.39         |
| 21.347          | 23.828         | 19.893        | 92.42         | 89.61         |
|                 | <b>25.782</b>  | <b>22.200</b> | <b>100.00</b> | <b>100.00</b> |

Supplementary Fig. 158. HPLC spectrum of chiral 2j.

**2k**, 4-(2-ethylnaphthalen-1-yl)-2*H*-quinolizin-2-one

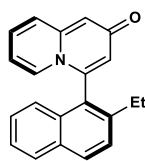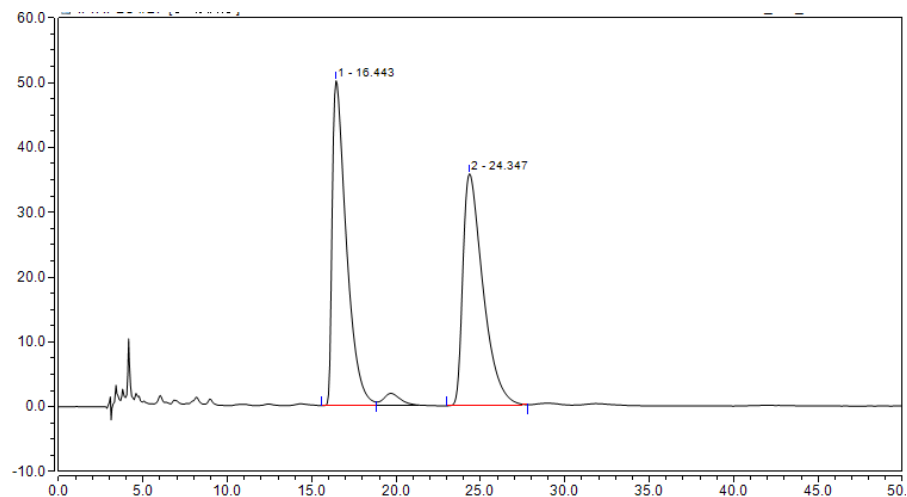

| Ret. Time (min) | Area (mAU*min) | Height (mAU)  | Area %        | Height %      |
|-----------------|----------------|---------------|---------------|---------------|
| 16.443          | 48.720         | 50.120        | 49.70         | 58.35         |
| 24.347          | 49.304         | 35.774        | 50.30         | 41.65         |
|                 | <b>98.024</b>  | <b>85.894</b> | <b>100.00</b> | <b>100.00</b> |

Supplementary Fig. 159. HPLC spectrum of racemic 2k.

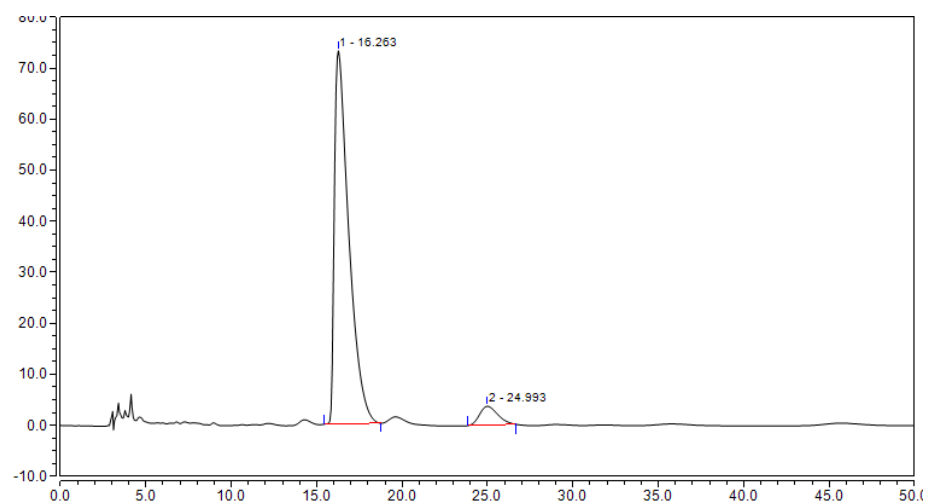

| Ret. Time (min) | Area (mAU*min) | Height (mAU)  | Area %        | Height %      |
|-----------------|----------------|---------------|---------------|---------------|
| 16.263          | 71.652         | 73.144        | 94.02         | 95.18         |
| 24.993          | 4.558          | 3.701         | 5.98          | 4.82          |
|                 | <b>76.210</b>  | <b>76.845</b> | <b>100.00</b> | <b>100.00</b> |

Supplementary Fig. 160. HPLC spectrum of chiral 2k.

**21**, 4-(2-butyl-naphthalen-1-yl)-2*H*-quinolizin-2-one

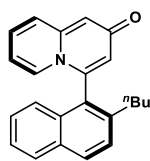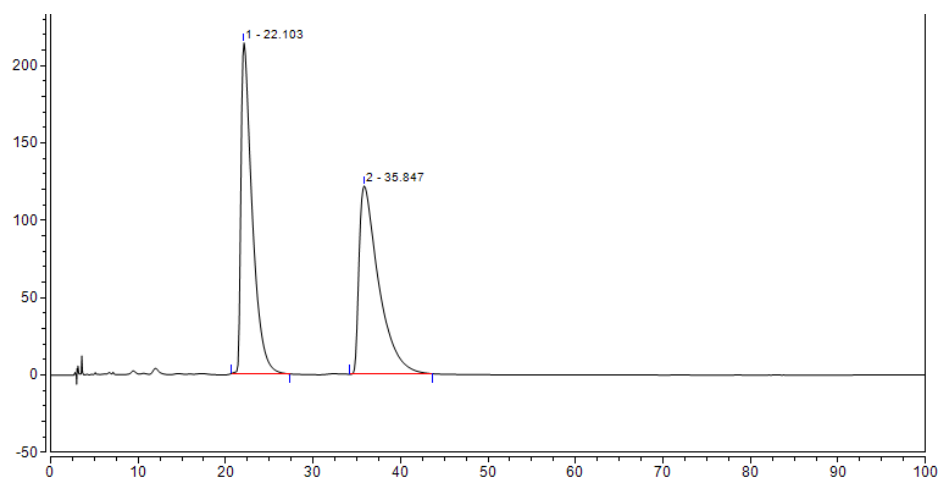

| Ret. Time (min) | Area (mAU*min) | Height (mAU)   | Area %        | Height %      |
|-----------------|----------------|----------------|---------------|---------------|
| 22.103          | 316.775        | 213.669        | 50.13         | 63.71         |
| 35.847          | 315.075        | 121.695        | 49.87         | 36.29         |
|                 | <b>631.849</b> | <b>335.364</b> | <b>100.00</b> | <b>100.00</b> |

Supplementary Fig. 161. HPLC spectrum of racemic 21.

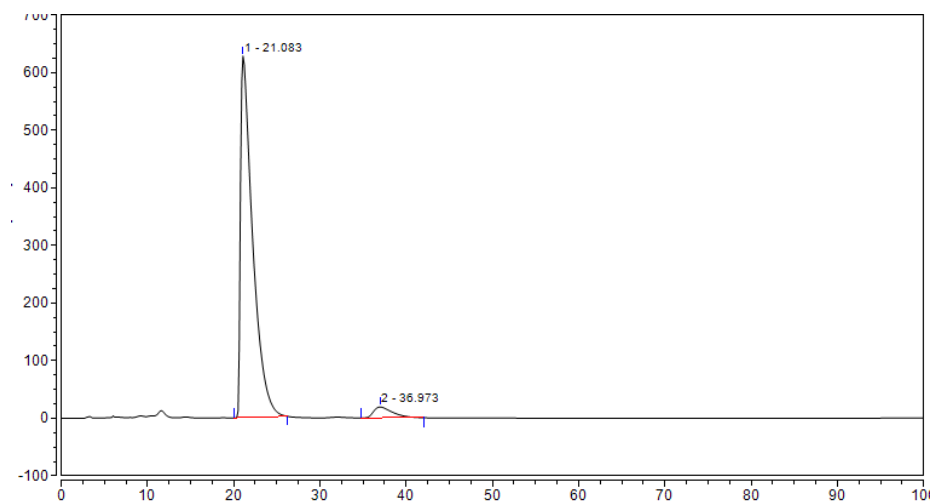

| Ret. Time (min) | Area (mAU*min)  | Height (mAU)   | Area %        | Height %      |
|-----------------|-----------------|----------------|---------------|---------------|
| 21.083          | 1024.229        | 628.384        | 95.45         | 97.06         |
| 36.973          | 48.809          | 19.049         | 4.55          | 2.94          |
|                 | <b>1073.038</b> | <b>647.433</b> | <b>100.00</b> | <b>100.00</b> |

Supplementary Fig. 162. HPLC spectrum of chiral 21.

**2m**, 4-(2-isopropyl-naphthalen-1-yl)-2*H*-quinolizin-2-one

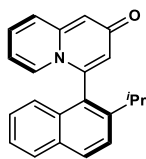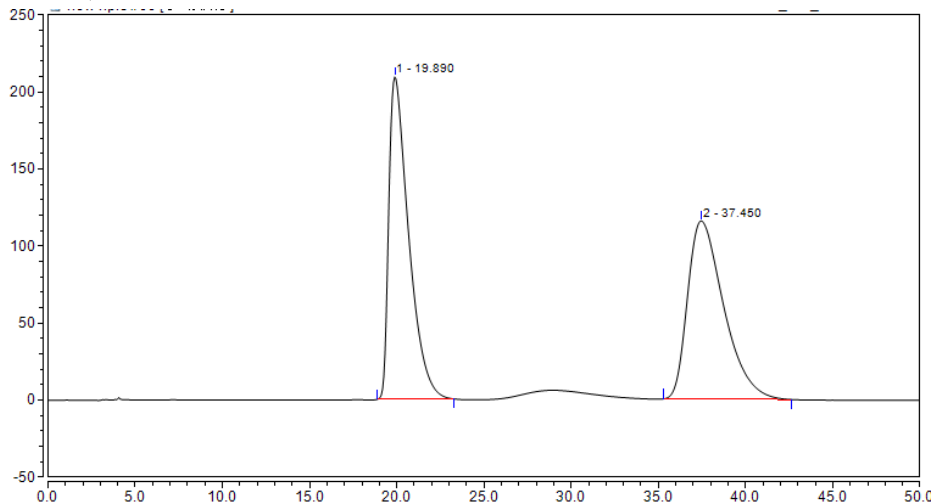

| Ret. Time (min) | Area (mAU*min) | Height (mAU)   | Area %        | Height %      |
|-----------------|----------------|----------------|---------------|---------------|
| 19.890          | 275.422        | 209.290        | 49.80         | 64.40         |
| 37.450          | 277.619        | 115.686        | 50.20         | 35.60         |
|                 | <b>553.041</b> | <b>324.977</b> | <b>100.00</b> | <b>100.00</b> |

Supplementary Fig. 163. HPLC spectrum of racemic 2m.

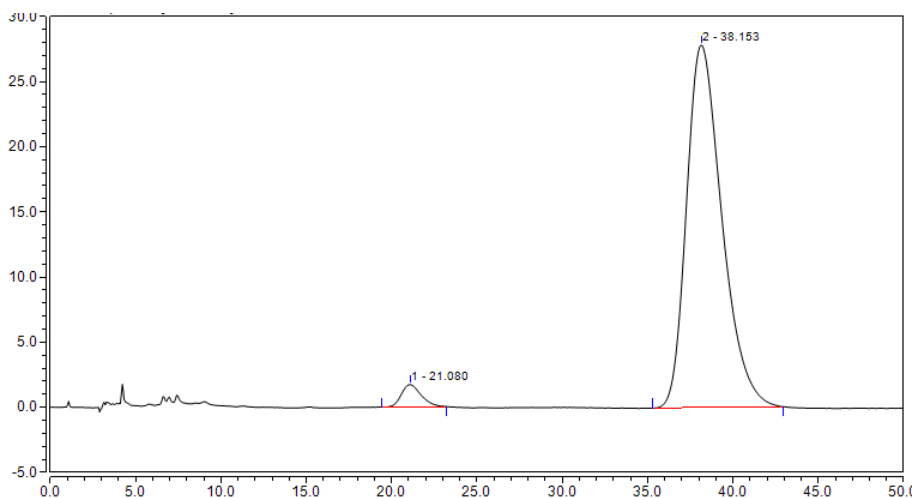

| Ret. Time (min) | Area (mAU*min) | Height (mAU)  | Area %        | Height %      |
|-----------------|----------------|---------------|---------------|---------------|
| 21.080          | 2.308          | 1.727         | 3.34          | 5.84          |
| 38.153          | 66.764         | 27.833        | 96.66         | 94.16         |
|                 | <b>69.072</b>  | <b>29.559</b> | <b>100.00</b> | <b>100.00</b> |

Supplementary Fig. 164. HPLC spectrum of chiral 2m.

**2n**, 4-(2-phenylnaphthalen-1-yl)-2*H*-quinolizin-2-one

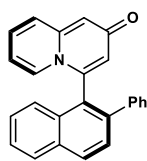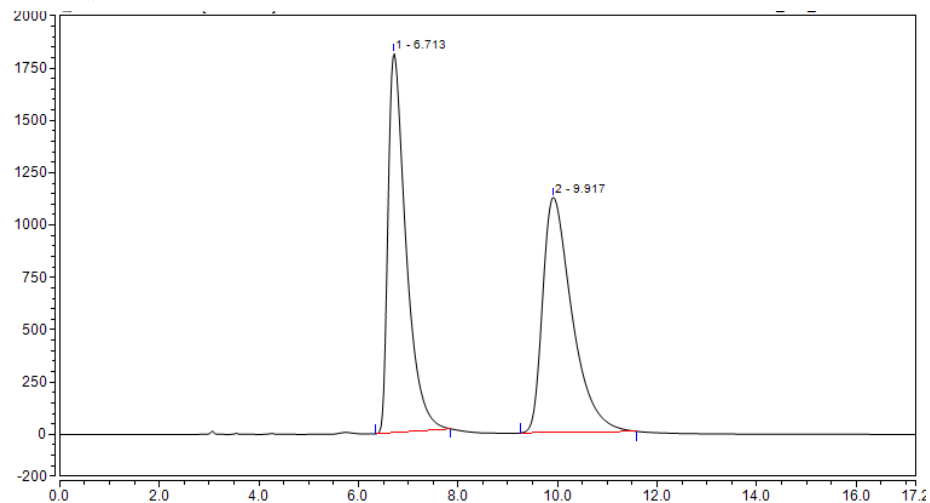

| Ret. Time (min) | Area (mAU*min)  | Height (mAU)    | Area %        | Height %      |
|-----------------|-----------------|-----------------|---------------|---------------|
| 6.713           | 756.574         | 1811.137        | 49.64         | 61.71         |
| 9.917           | 767.576         | 1123.857        | 50.36         | 38.29         |
|                 | <b>1524.150</b> | <b>2934.994</b> | <b>100.00</b> | <b>100.00</b> |

**Supplementary Fig. 165. HPLC spectrum of racemic 2n.**

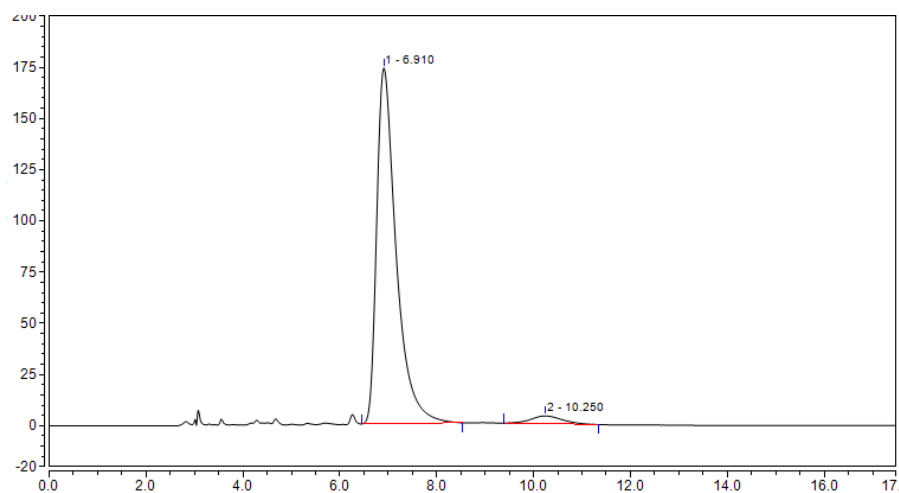

| Ret. Time (min) | Area (mAU*min) | Height (mAU)   | Area %        | Height %      |
|-----------------|----------------|----------------|---------------|---------------|
| 6.910           | 80.853         | 173.770        | 96.52         | 97.85         |
| 10.250          | 2.911          | 3.826          | 3.48          | 2.15          |
|                 | <b>83.764</b>  | <b>177.596</b> | <b>100.00</b> | <b>100.00</b> |

**Supplementary Fig. 166. HPLC spectrum of chiral 2n.**

**2o**, 4-([1,2'-binaphthalen]-1'-yl)-2*H*-quinolizin-2-one

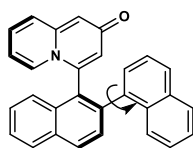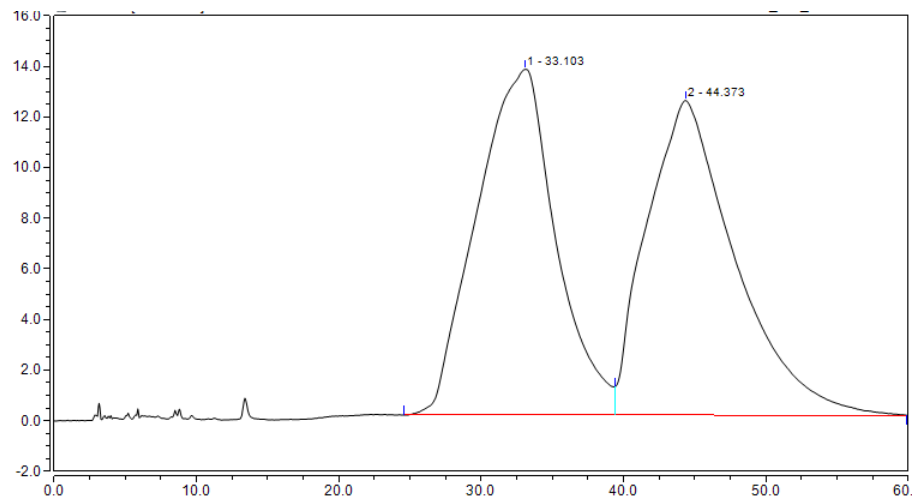

| Ret. Time (min) | Area (mAU*min) | Height (mAU)  | Area %        | Height %      |
|-----------------|----------------|---------------|---------------|---------------|
| 33.103          | 88.146         | 13.658        | 49.75         | 52.35         |
| 44.373          | 89.022         | 12.429        | 50.25         | 47.65         |
|                 | <b>177.167</b> | <b>26.088</b> | <b>100.00</b> | <b>100.00</b> |

Supplementary Fig. 167. HPLC spectrum of racemic 2o.

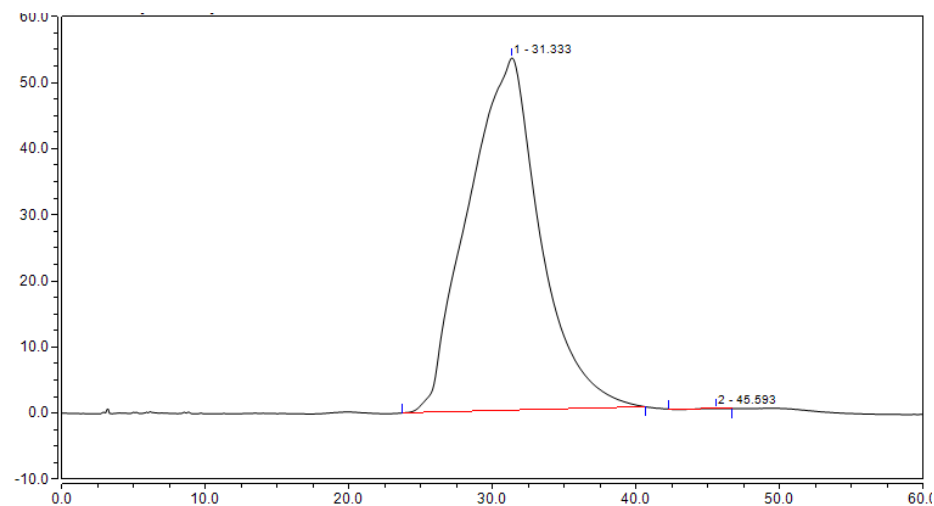

| Ret. Time (min) | Area (mAU*min) | Height (mAU)  | Area %        | Height %      |
|-----------------|----------------|---------------|---------------|---------------|
| 31.333          | 310.095        | 53.307        | 99.97         | 99.93         |
| 45.593          | 0.087          | 0.036         | 0.03          | 0.07          |
|                 | <b>310.182</b> | <b>53.344</b> | <b>100.00</b> | <b>100.00</b> |

Supplementary Fig. 168. HPLC spectrum of chiral 2o.

**2p**, 4-(2-bromonaphthalen-1-yl)-2*H*-quinolizin-2-one

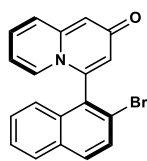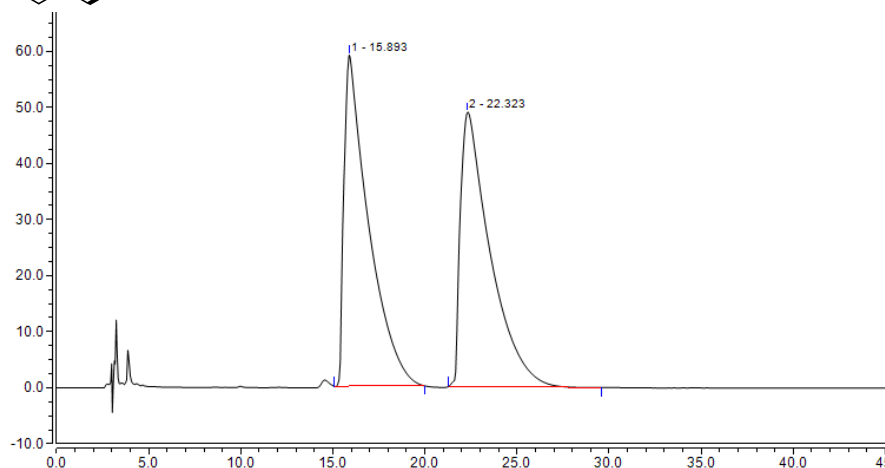

| Ret. Time<br>(min) | Area<br>(mAU*min) | Height<br>(mAU) | Area<br>%     | Height<br>%   |
|--------------------|-------------------|-----------------|---------------|---------------|
| 15.893             | 91.130            | 59.077          | 49.87         | 54.67         |
| 22.323             | 91.587            | 48.975          | 50.13         | 45.33         |
|                    | <b>182.717</b>    | <b>108.052</b>  | <b>100.00</b> | <b>100.00</b> |

**Supplementary Fig. 169. HPLC spectrum of racemic 2p.**

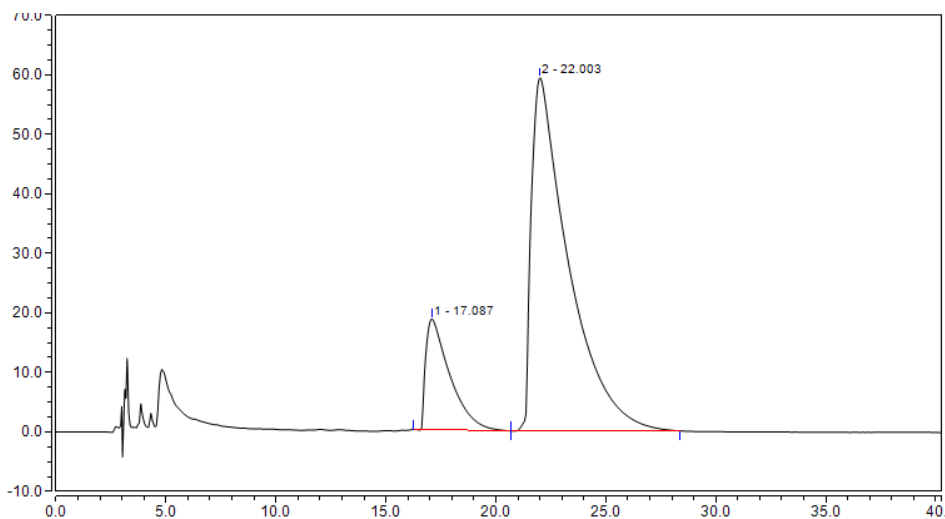

| Ret. Time<br>(min) | Area<br>(mAU*min) | Height<br>(mAU) | Area<br>%     | Height<br>%   |
|--------------------|-------------------|-----------------|---------------|---------------|
| 17.087             | 23.639            | 18.618          | 16.95         | 23.87         |
| 22.003             | 115.808           | 59.382          | 83.05         | 76.13         |
|                    | <b>139.447</b>    | <b>78.000</b>   | <b>100.00</b> | <b>100.00</b> |

**Supplementary Fig. 170. HPLC spectrum of chiral 2p.**



**2q**, 4-(2-chloronaphthalen-1-yl)-2H-quinolizin-2-one

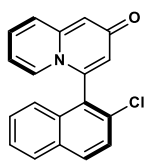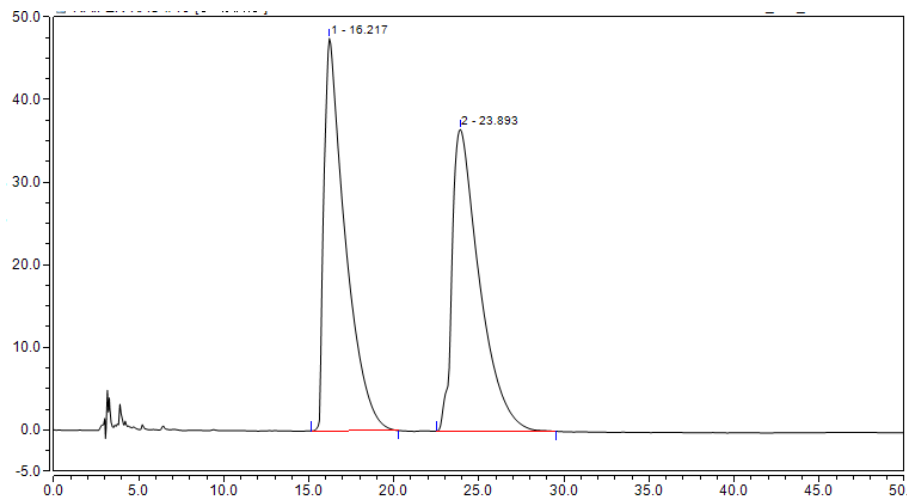

| Ret. Time (min) | Area (mAU*min) | Height (mAU)  | Area %        | Height %      |
|-----------------|----------------|---------------|---------------|---------------|
| 16.217          | 68.875         | 47.539        | 50.28         | 56.54         |
| 23.893          | 68.120         | 36.535        | 49.72         | 43.46         |
|                 | <b>136.995</b> | <b>84.074</b> | <b>100.00</b> | <b>100.00</b> |

Supplementary Fig. 171. HPLC spectrum of racemic 2q.

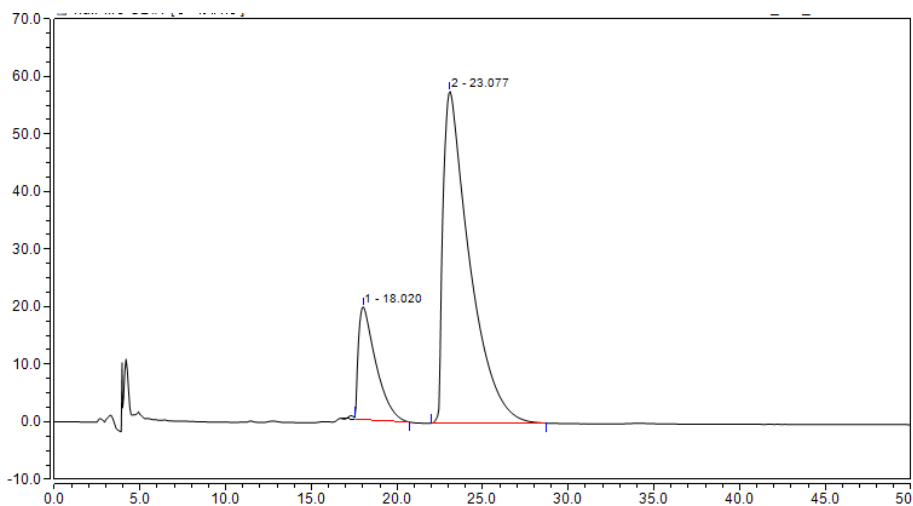

| Ret. Time (min) | Area (mAU*min) | Height (mAU)  | Area %        | Height %      |
|-----------------|----------------|---------------|---------------|---------------|
| 18.020          | 23.196         | 19.631        | 18.32         | 25.39         |
| 23.077          | 103.452        | 57.684        | 81.68         | 74.61         |
|                 | <b>126.648</b> | <b>77.315</b> | <b>100.00</b> | <b>100.00</b> |

Supplementary Fig. 172. HPLC spectrum of chiral 2q.

**2r**, 9-bromo-4-(2-ethoxynaphthalen-1-yl)-2*H*-quinolizin-2-one

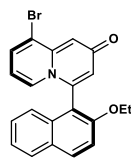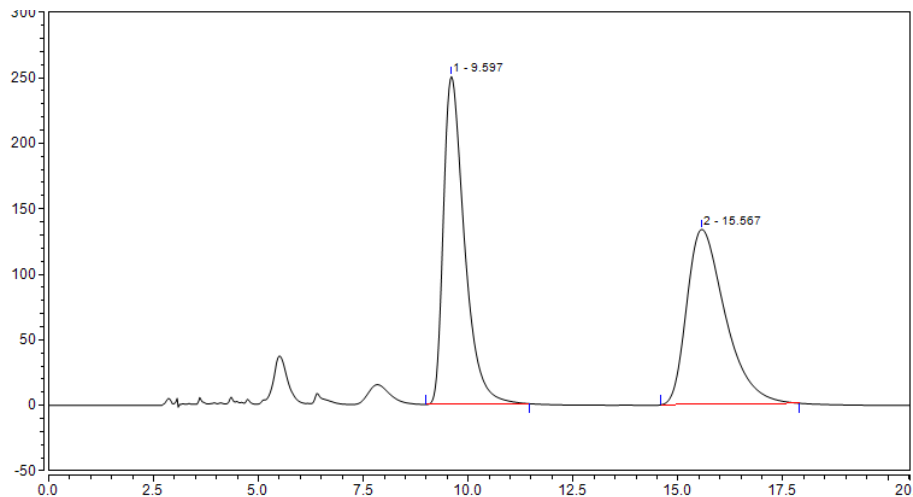

| Ret. Time (min) | Area (mAU*min) | Height (mAU)   | Area %        | Height %      |
|-----------------|----------------|----------------|---------------|---------------|
| 9.597           | 145.641        | 250.255        | 50.67         | 65.20         |
| 15.567          | 141.791        | 133.587        | 49.33         | 34.80         |
|                 | <b>287.432</b> | <b>383.843</b> | <b>100.00</b> | <b>100.00</b> |

**Supplementary Fig. 173. HPLC spectrum of racemic 2r.**

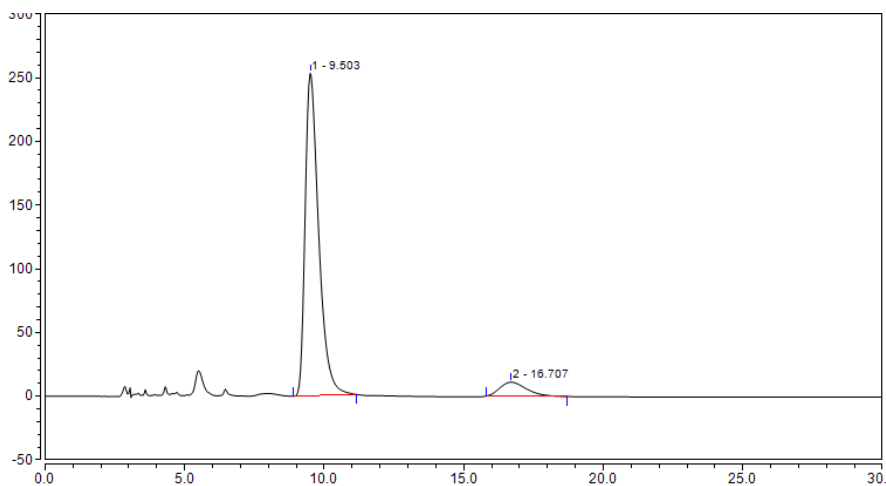

| Ret. Time (min) | Area (mAU*min) | Height (mAU)   | Area %        | Height %      |
|-----------------|----------------|----------------|---------------|---------------|
| 9.503           | 142.233        | 253.223        | 92.07         | 95.83         |
| 16.707          | 12.245         | 11.024         | 7.93          | 4.17          |
|                 | <b>154.478</b> | <b>264.247</b> | <b>100.00</b> | <b>100.00</b> |

**Supplementary Fig. 174. HPLC spectrum of chiral 2r.**

**2s**, 8-bromo-4-(2-ethoxynaphthalen-1-yl)-2*H*-quinolizin-2-one

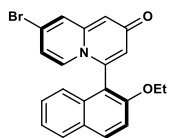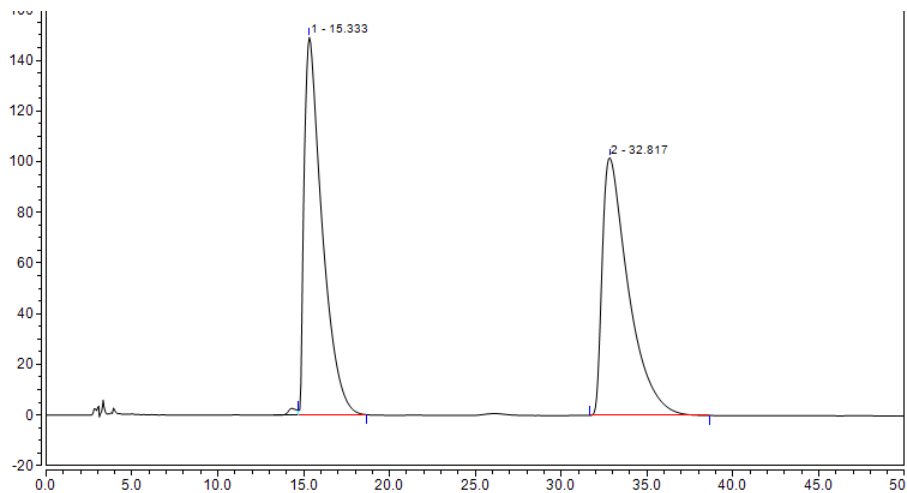

| Ret. Time (min) | Area (mAU*min) | Height (mAU)   | Area %        | Height %      |
|-----------------|----------------|----------------|---------------|---------------|
| 15.333          | 180.769        | 149.079        | 50.21         | 59.44         |
| 32.817          | 179.221        | 101.727        | 49.79         | 40.56         |
|                 | <b>359.990</b> | <b>250.805</b> | <b>100.00</b> | <b>100.00</b> |

**Supplementary Fig. 175. HPLC spectrum of racemic 2s.**

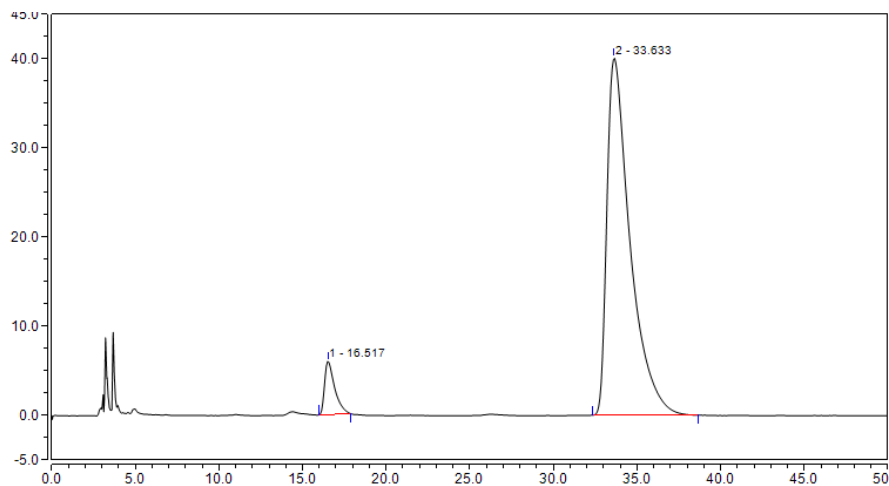

| Ret. Time (min) | Area (mAU*min) | Height (mAU)  | Area %        | Height %      |
|-----------------|----------------|---------------|---------------|---------------|
| 16.517          | 4.213          | 5.999         | 6.16          | 13.03         |
| 33.633          | 64.233         | 40.059        | 93.84         | 86.97         |
|                 | <b>68.447</b>  | <b>46.059</b> | <b>100.00</b> | <b>100.00</b> |

**Supplementary Fig. 176. HPLC spectrum of chiral 2s.**

**2t**, 8-chloro-4-(2-ethoxynaphthalen-1-yl)-2H-quinolizin-2-one

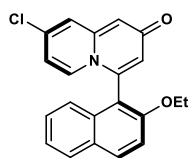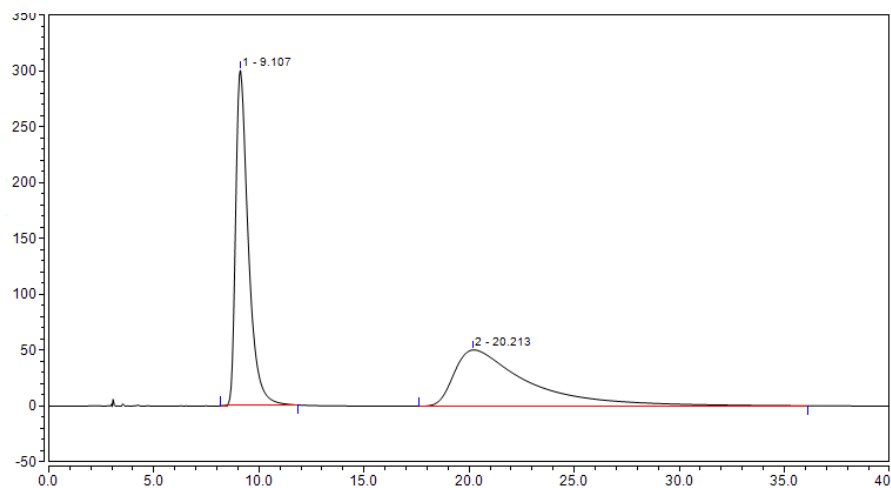

| Ret. Time (min) | Area (mAU*min) | Height (mAU)   | Area %        | Height %      |
|-----------------|----------------|----------------|---------------|---------------|
| 9.107           | 209.491        | 300.214        | 50.65         | 85.63         |
| 20.213          | 204.145        | 50.379         | 49.35         | 14.37         |
|                 | <b>413.637</b> | <b>350.594</b> | <b>100.00</b> | <b>100.00</b> |

Supplementary Fig. 177. HPLC spectrum of racemic 2t.

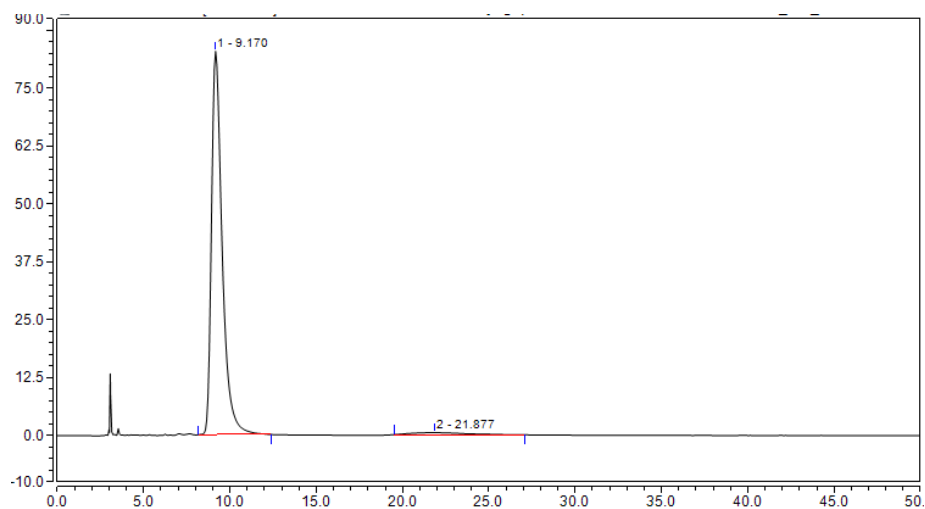

| Ret. Time (min) | Area (mAU*min) | Height (mAU)  | Area %        | Height %      |
|-----------------|----------------|---------------|---------------|---------------|
| 9.170           | 59.532         | 82.800        | 97.32         | 99.46         |
| 21.877          | 1.639          | 0.452         | 2.68          | 0.54          |
|                 | <b>61.172</b>  | <b>83.253</b> | <b>100.00</b> | <b>100.00</b> |

Supplementary Fig. 178. HPLC spectrum of chiral 2t.

**2u**, 7-bromo-4-(2-ethoxynaphthalen-1-yl)-2*H*-quinolizin-2-one

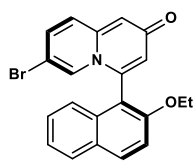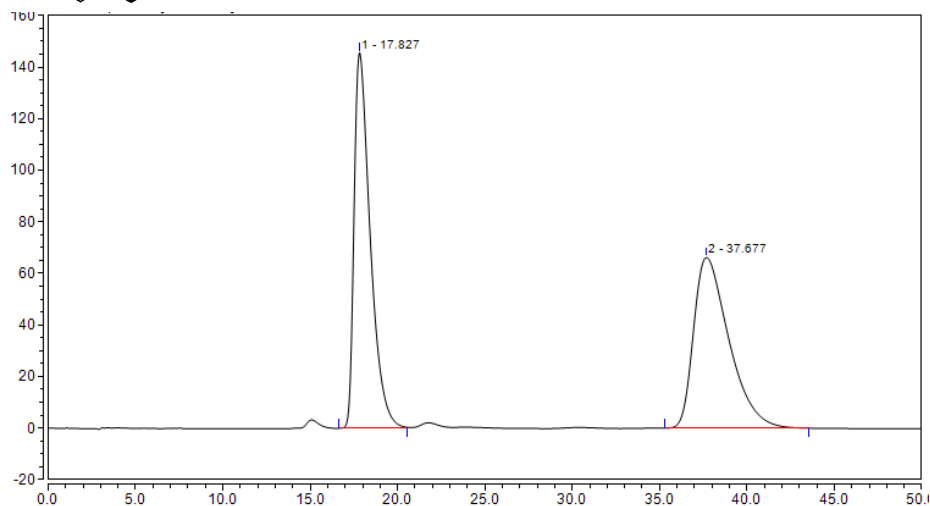

| Ret. Time (min) | Area (mAU*min) | Height (mAU)   | Area %        | Height %      |
|-----------------|----------------|----------------|---------------|---------------|
| 17.827          | 154.963        | 145.585        | 50.01         | 68.76         |
| 37.677          | 154.889        | 66.157         | 49.99         | 31.24         |
|                 | <b>309.852</b> | <b>211.742</b> | <b>100.00</b> | <b>100.00</b> |

Supplementary Fig. 179. HPLC spectrum of racemic 2u.

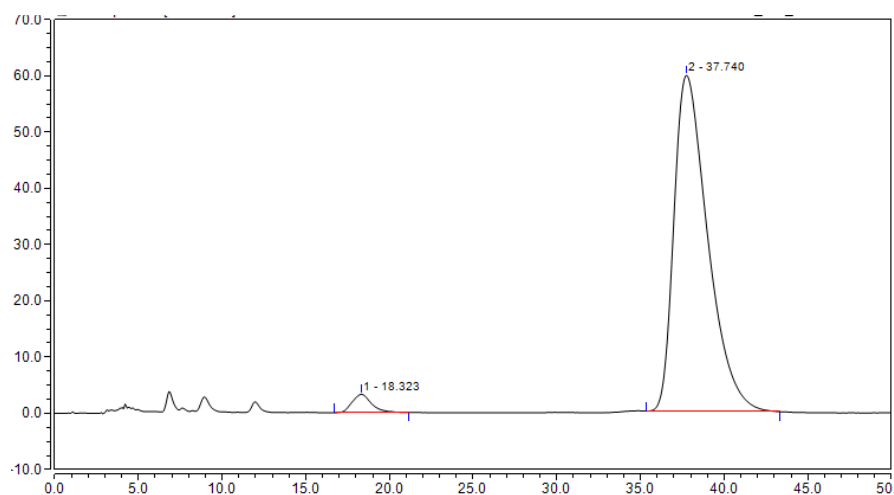

| Ret. Time (min) | Area (mAU*min) | Height (mAU)  | Area %        | Height %      |
|-----------------|----------------|---------------|---------------|---------------|
| 18.323          | 4.387          | 3.248         | 3.05          | 5.16          |
| 37.740          | 139.504        | 59.748        | 96.95         | 94.84         |
|                 | <b>143.891</b> | <b>62.997</b> | <b>100.00</b> | <b>100.00</b> |

Supplementary Fig. 180. HPLC spectrum of chiral 2u.

**2v**, 4-(2-ethoxynaphthalen-1-yl)-7-methyl-2H-quinolizin-2-one

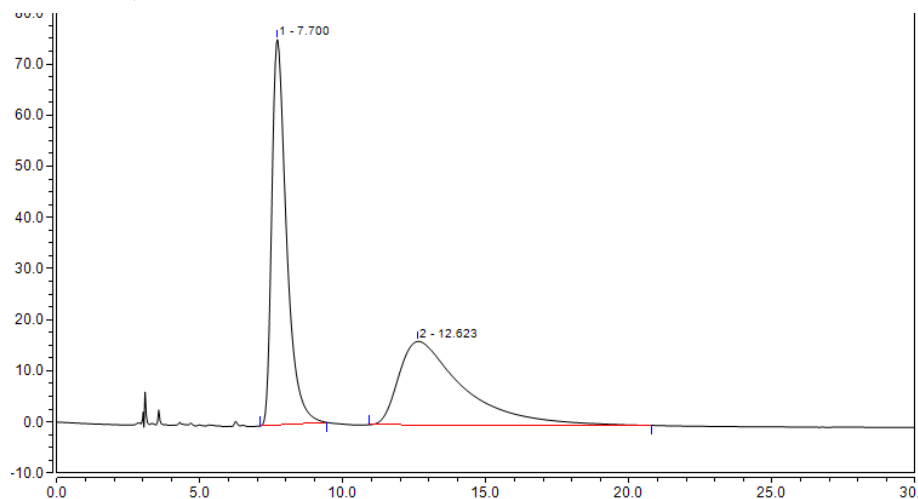

| Ret. Time (min) | Area (mAU*min) | Height (mAU)  | Area %        | Height %      |
|-----------------|----------------|---------------|---------------|---------------|
| 7.700           | 45.202         | 75.400        | 51.63         | 82.20         |
| 12.623          | 42.343         | 16.331        | 48.37         | 17.80         |
|                 | <b>87.545</b>  | <b>91.731</b> | <b>100.00</b> | <b>100.00</b> |

**Supplementary Fig. 181. HPLC spectrum of racemic 2v.**

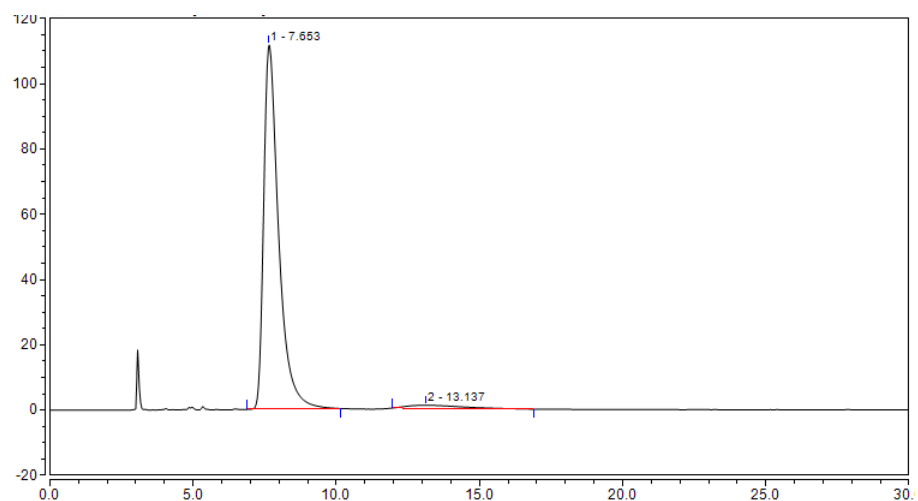

| Ret. Time (min) | Area (mAU*min) | Height (mAU)   | Area %        | Height %      |
|-----------------|----------------|----------------|---------------|---------------|
| 7.653           | 67.655         | 111.631        | 96.93         | 99.15         |
| 13.137          | 2.143          | 0.955          | 3.07          | 0.85          |
|                 | <b>69.797</b>  | <b>112.586</b> | <b>100.00</b> | <b>100.00</b> |

**Supplementary Fig. 182. HPLC spectrum of chiral 2v.**

**2w**, 6-(2-ethoxynaphthalen-1-yl)-8*H*-pyrido[1,2-*a*]pyrazin-8-one

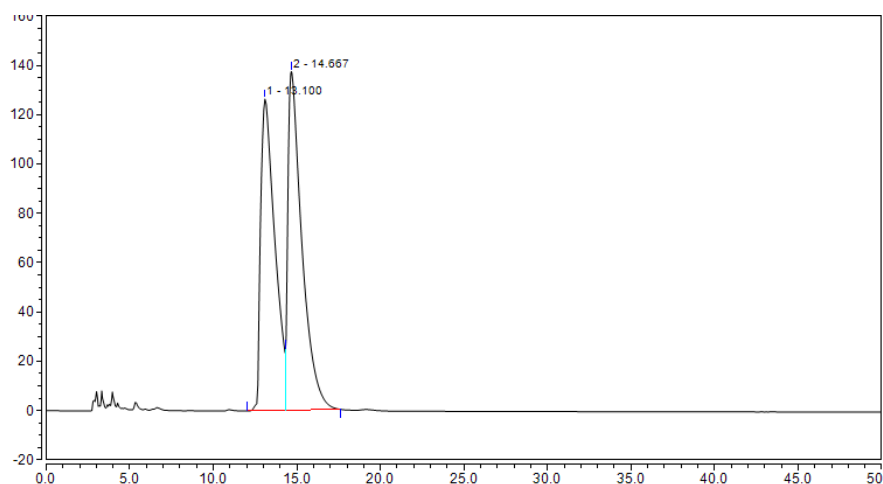

| Ret. Time (min) | Area (mAU*min) | Height (mAU)   | Area %        | Height %      |
|-----------------|----------------|----------------|---------------|---------------|
| 13.100          | 123.929        | 126.442        | 48.21         | 47.93         |
| 14.667          | 133.146        | 137.361        | 51.79         | 52.07         |
|                 | <b>257.076</b> | <b>263.802</b> | <b>100.00</b> | <b>100.00</b> |

**Supplementary Fig. 183. HPLC spectrum of racemic 2w.**

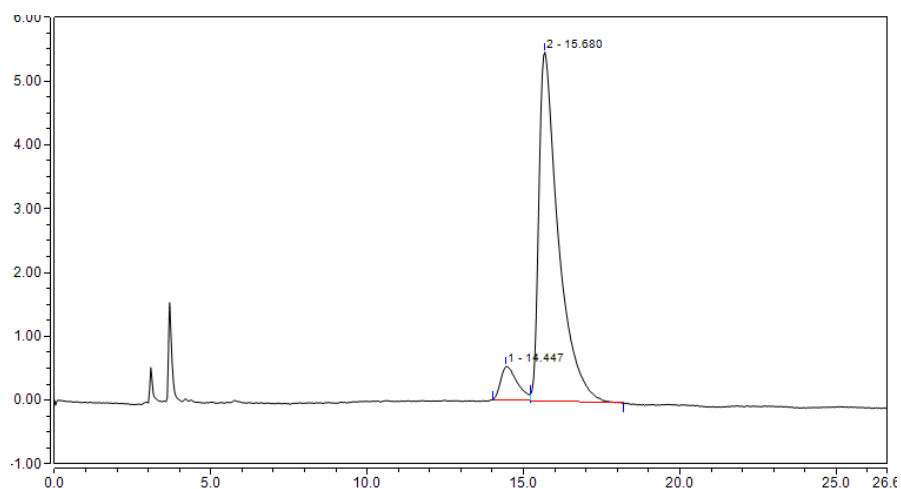

| Ret. Time (min) | Area (mAU*min) | Height (mAU) | Area %        | Height %      |
|-----------------|----------------|--------------|---------------|---------------|
| 14.447          | 0.324          | 0.529        | 7.58          | 8.83          |
| 15.680          | 3.951          | 5.467        | 92.42         | 91.17         |
|                 | <b>4.275</b>   | <b>5.996</b> | <b>100.00</b> | <b>100.00</b> |

**Supplementary Fig. 184. HPLC spectrum of chiral 2w.**

**3,** di-*tert*-butyl 1-(4-(2-ethoxynaphthalen-1-yl)-2-oxo-2*H*-quinolizin-1-yl)-hydrazine-1,2-dicarboxylate

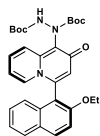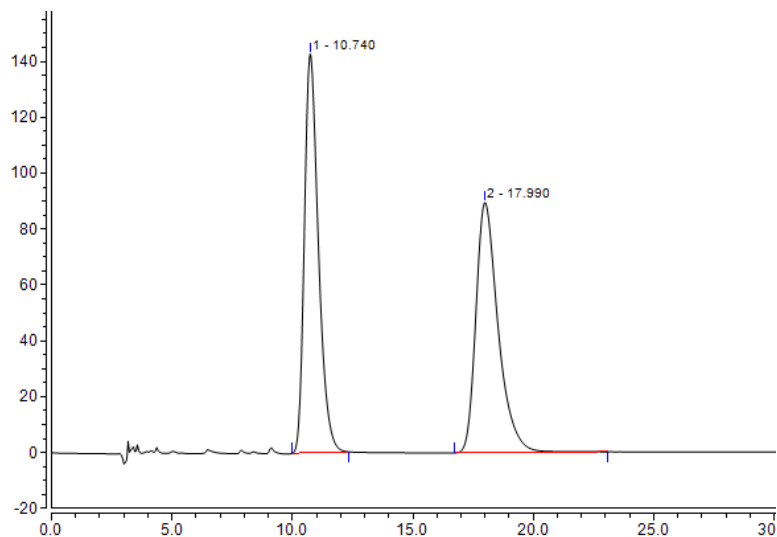

| Ret. Time (min) | Area (mAU*min) | Height (mAU)   | Area %        | Height %      |
|-----------------|----------------|----------------|---------------|---------------|
| 10.740          | 96.163         | 142.799        | 50.09         | 61.44         |
| 17.990          | 95.817         | 89.615         | 49.91         | 38.56         |
|                 | <b>191.980</b> | <b>232.414</b> | <b>100.00</b> | <b>100.00</b> |

**Supplementary Fig. 185. HPLC spectrum of racemic 3.**

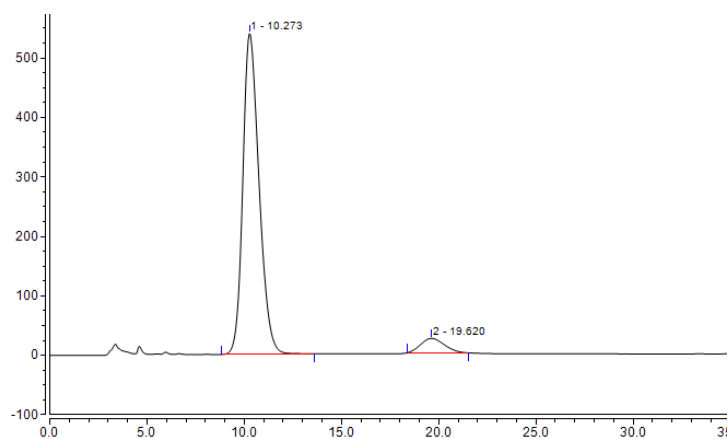

| Ret. Time (min) | Area (mAU*min) | Height (mAU)   | Area %        | Height %      |
|-----------------|----------------|----------------|---------------|---------------|
| 10.273          | 521.843        | 539.849        | 93.89         | 95.71         |
| 19.620          | 33.973         | 24.203         | 6.11          | 4.29          |
|                 | <b>555.816</b> | <b>564.052</b> | <b>100.00</b> | <b>100.00</b> |

**Supplementary Fig. 186. HPLC spectrum of chiral 3.**



4, 4-(2-hydroxynaphthalen-1-yl)-2H-quinolizin-2-one

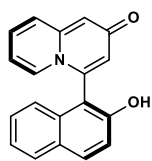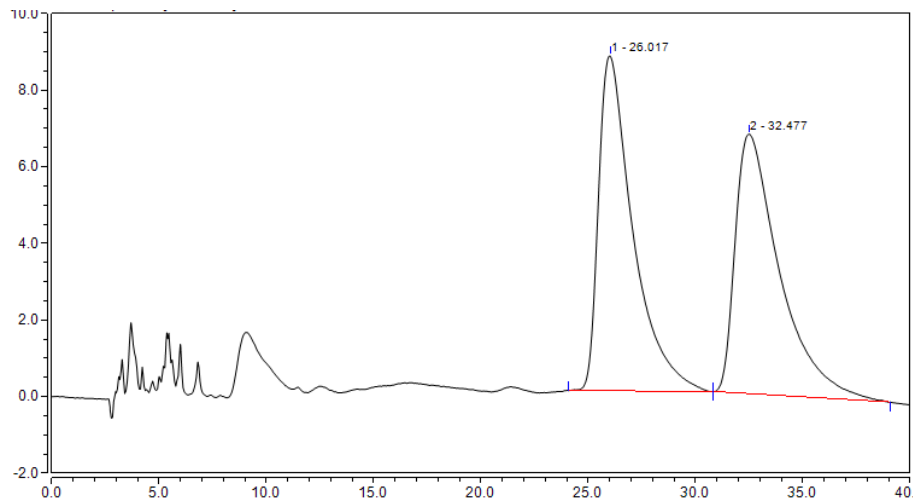

| Ret. Time (min) | Area (mAU*min) | Height (mAU)  | Area %        | Height %      |
|-----------------|----------------|---------------|---------------|---------------|
| 26.017          | 16.249         | 8.753         | 50.07         | 56.36         |
| 32.477          | 16.203         | 6.778         | 49.93         | 43.64         |
|                 | <b>32.452</b>  | <b>15.531</b> | <b>100.00</b> | <b>100.00</b> |

Supplementary Fig. 187. HPLC spectrum of racemic 4.

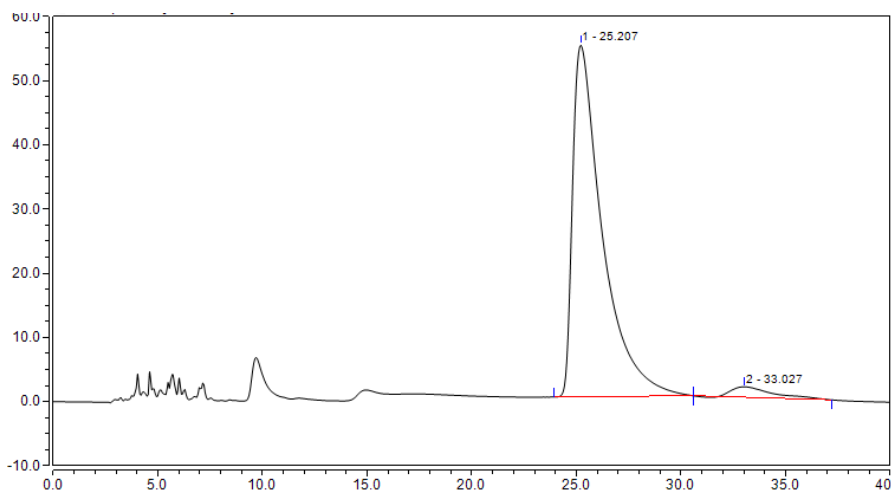

| Ret. Time (min) | Area (mAU*min) | Height (mAU)  | Area %        | Height %      |
|-----------------|----------------|---------------|---------------|---------------|
| 25.207          | 90.276         | 54.790        | 96.06         | 97.11         |
| 33.027          | 3.703          | 1.632         | 3.94          | 2.89          |
|                 | <b>93.979</b>  | <b>56.422</b> | <b>100.00</b> | <b>100.00</b> |

Supplementary Fig. 188. HPLC spectrum of chiral 4.

5, 4-(2-((diphenylphosphanyl)oxy)naphthalen-1-yl)-2H-quinolizin-2-one

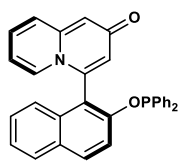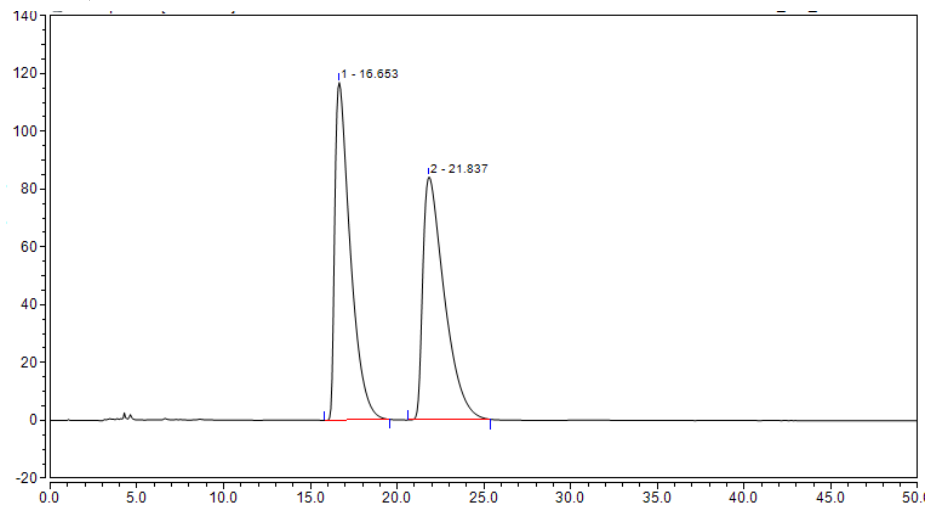

| Ret. Time (min) | Area (mAU*min) | Height (mAU)   | Area %        | Height %      |
|-----------------|----------------|----------------|---------------|---------------|
| 16.653          | 121.084        | 116.870        | 50.10         | 58.17         |
| 21.837          | 120.599        | 84.025         | 49.90         | 41.83         |
|                 | <b>241.684</b> | <b>200.895</b> | <b>100.00</b> | <b>100.00</b> |

Supplementary Fig. 189. HPLC spectrum of racemic 5.

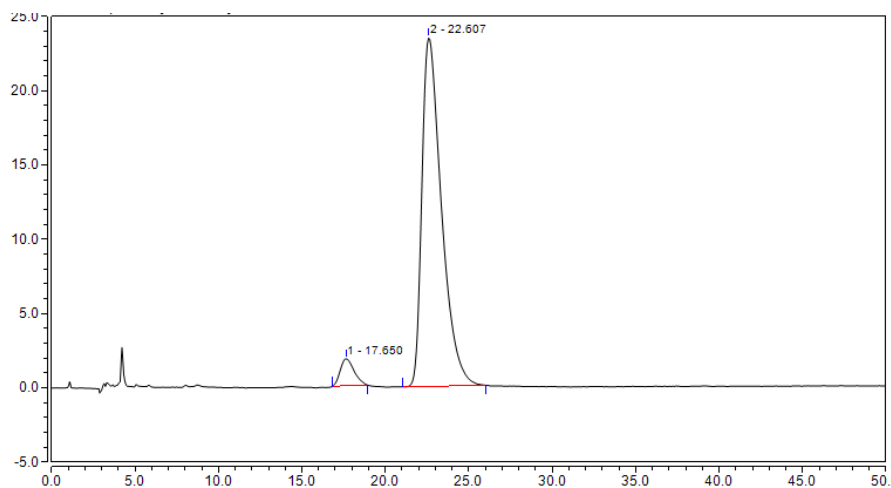

| Ret. Time (min) | Area (mAU*min) | Height (mAU)  | Area %        | Height %      |
|-----------------|----------------|---------------|---------------|---------------|
| 17.650          | 1.762          | 1.832         | 5.23          | 7.24          |
| 22.607          | 31.934         | 23.490        | 94.77         | 92.76         |
|                 | <b>33.696</b>  | <b>25.323</b> | <b>100.00</b> | <b>100.00</b> |

Supplementary Fig. 190. HPLC spectrum of chiral 5.

6,1-(2-oxo-2H-quinolizin-4-yl)naphthalen-2-yl trifluoromethanesulfonate

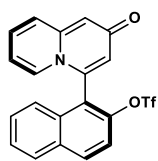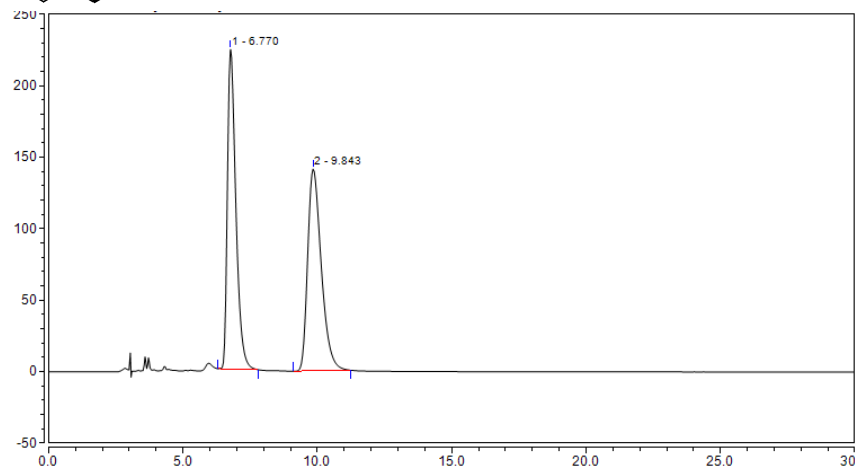

| Ret. Time (min) | Area (mAU*min) | Height (mAU)   | Area %        | Height %      |
|-----------------|----------------|----------------|---------------|---------------|
| 6.770           | 81.415         | 223.591        | 49.61         | 61.28         |
| 9.843           | 82.699         | 141.292        | 50.39         | 38.72         |
|                 | <b>164.113</b> | <b>364.883</b> | <b>100.00</b> | <b>100.00</b> |

Supplementary Fig. 191. HPLC spectrum of racemic 6.

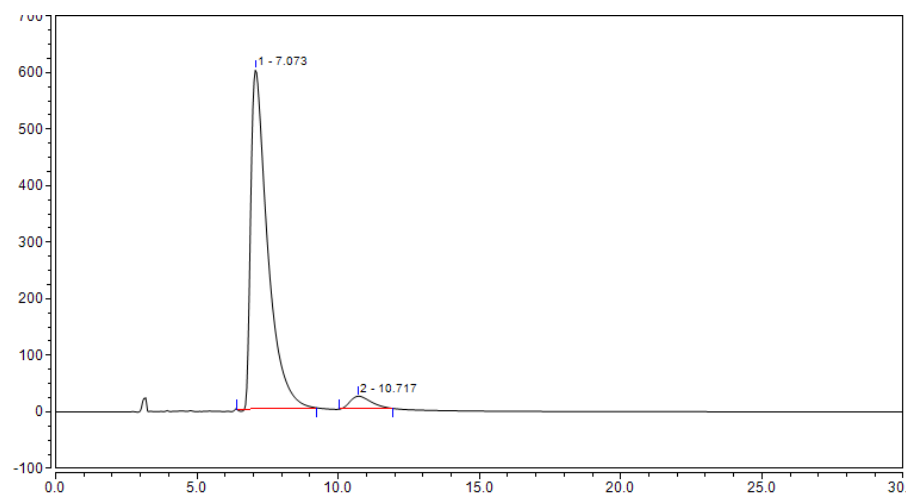

| Ret. Time (min) | Area (mAU*min) | Height (mAU)   | Area %        | Height %      |
|-----------------|----------------|----------------|---------------|---------------|
| 7.073           | 413.948        | 600.035        | 95.53         | 96.40         |
| 10.717          | 19.351         | 22.392         | 4.47          | 3.60          |
|                 | <b>433.299</b> | <b>622.427</b> | <b>100.00</b> | <b>100.00</b> |

Supplementary Fig. 192. HPLC spectrum of chiral 6.

7, 4-(2-(benzylamino)naphthalen-1-yl)-2H-quinolizin-2-one

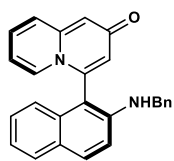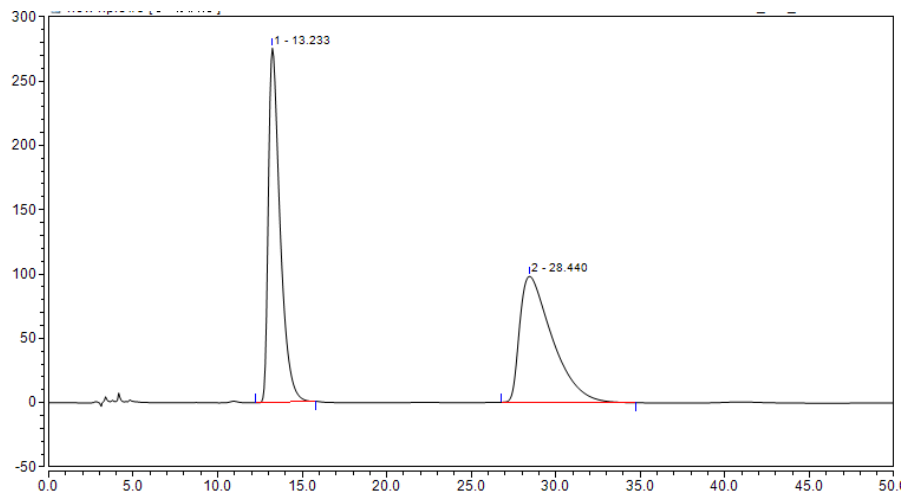

| Ret. Time (min) | Area (mAU*min) | Height (mAU)   | Area %        | Height %      |
|-----------------|----------------|----------------|---------------|---------------|
| 13.233          | 220.618        | 275.523        | 50.21         | 73.76         |
| 28.440          | 218.735        | 97.997         | 49.79         | 26.24         |
|                 | <b>439.354</b> | <b>373.520</b> | <b>100.00</b> | <b>100.00</b> |

Supplementary Fig. 193. HPLC spectrum of racemic 7.

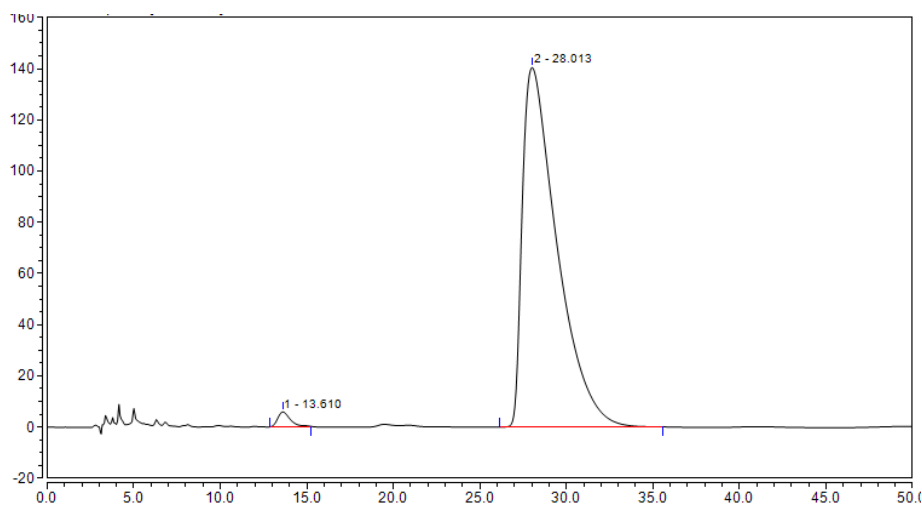

| Ret. Time (min) | Area (mAU*min) | Height (mAU)   | Area %        | Height %      |
|-----------------|----------------|----------------|---------------|---------------|
| 13.610          | 4.804          | 5.781          | 1.45          | 3.95          |
| 28.013          | 325.536        | 140.477        | 98.55         | 96.05         |
|                 | <b>330.341</b> | <b>146.257</b> | <b>100.00</b> | <b>100.00</b> |

Supplementary Fig. 194. HPLC spectrum of chiral 7.

8, 4-(2-aminonaphthalen-1-yl)-6,7,8,9-tetrahydro-2H-quinolizin-2-one

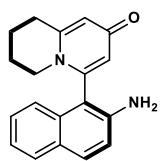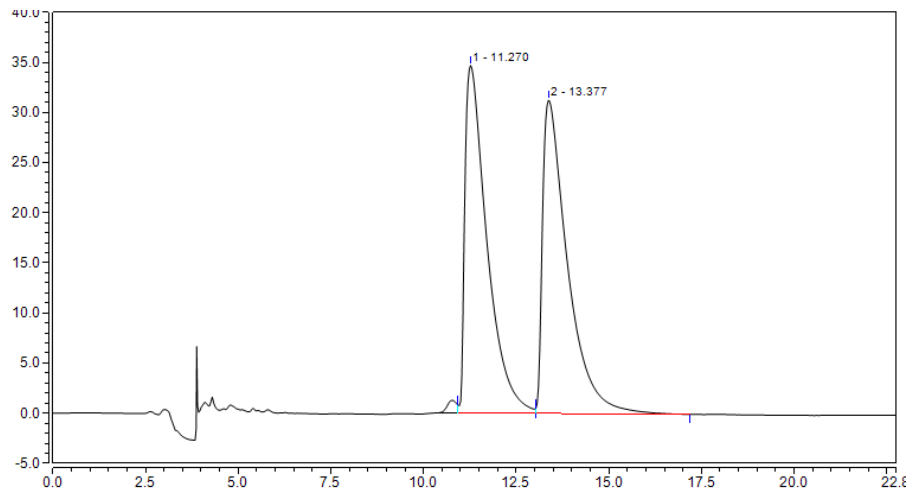

| Ret. Time (min) | Area (mAU*min) | Height (mAU)  | Area %        | Height %      |
|-----------------|----------------|---------------|---------------|---------------|
| 11.270          | 23.881         | 34.686        | 49.44         | 52.59         |
| 13.377          | 24.420         | 31.269        | 50.56         | 47.41         |
|                 | <b>48.302</b>  | <b>65.955</b> | <b>100.00</b> | <b>100.00</b> |

Supplementary Fig. 195. HPLC spectrum of racemic 8.

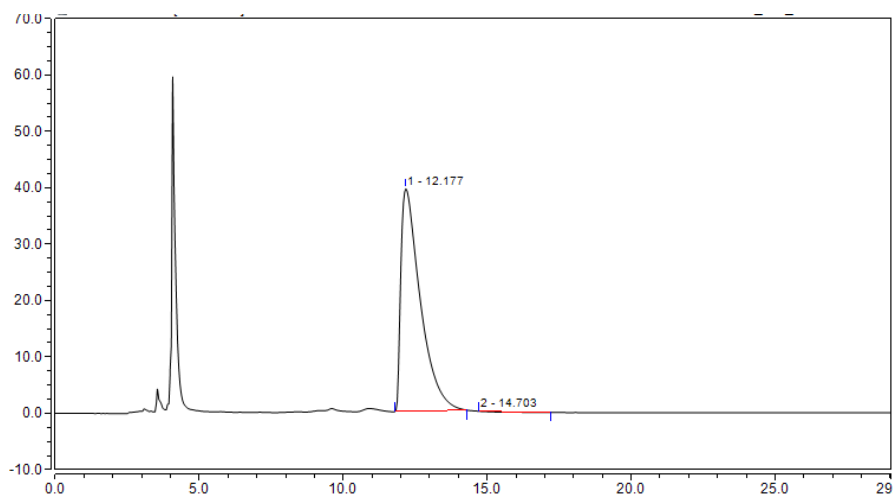

| Ret. Time (min) | Area (mAU*min) | Height (mAU)  | Area %        | Height %      |
|-----------------|----------------|---------------|---------------|---------------|
| 12.177          | 30.930         | 39.505        | 99.63         | 100.00        |
| 14.703          | 0.114          | 0.000         | 0.37          | 0.00          |
|                 | <b>31.044</b>  | <b>39.505</b> | <b>100.00</b> | <b>100.00</b> |

Supplementary Fig. 196. HPLC spectrum of chiral 8.

9, 4-(2-aminonaphthalen-1-yl)-2H-quinolizin-2-one

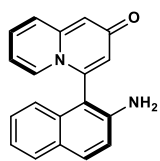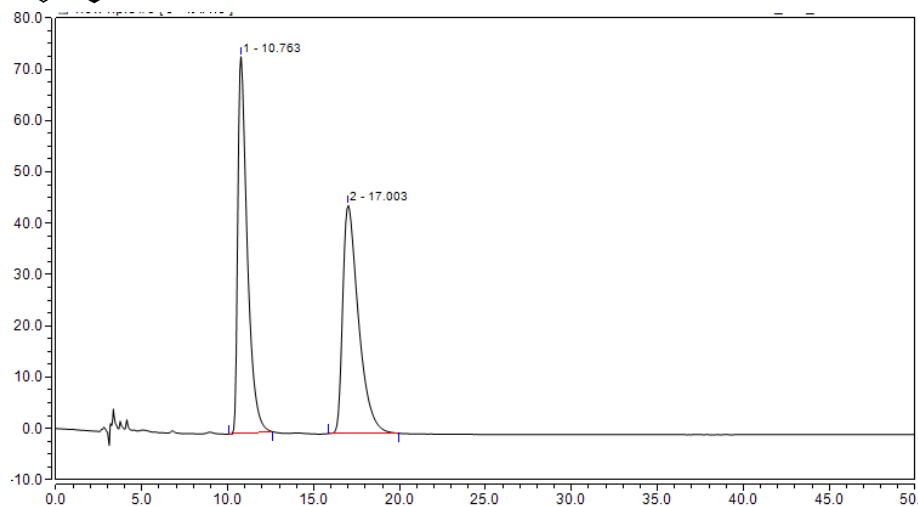

| Ret. Time (min) | Area (mAU*min) | Height (mAU)   | Area %        | Height %      |
|-----------------|----------------|----------------|---------------|---------------|
| 10.763          | 47.018         | 73.435         | 49.94         | 62.28         |
| 17.003          | 47.122         | 44.473         | 50.06         | 37.72         |
|                 | <b>94.140</b>  | <b>117.908</b> | <b>100.00</b> | <b>100.00</b> |

Supplementary Fig. 197. HPLC spectrum of racemic 9.

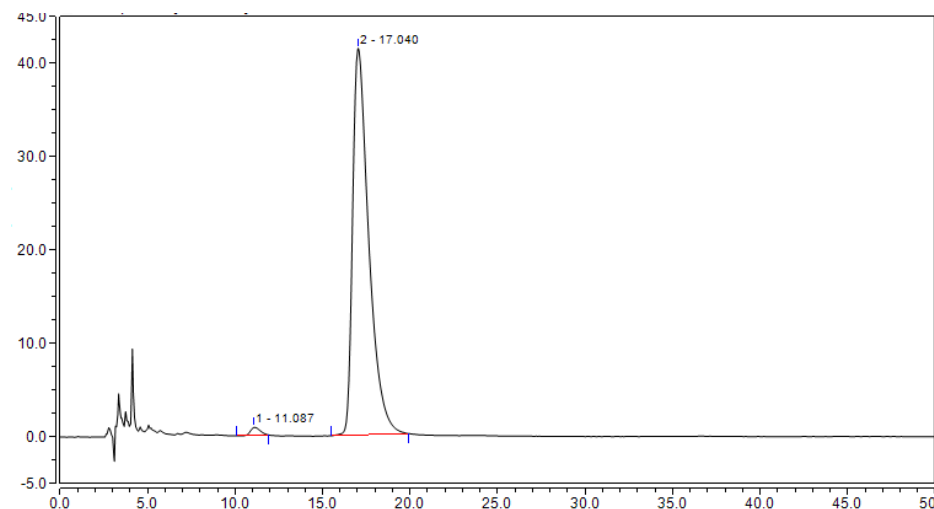

| Ret. Time (min) | Area (mAU*min) | Height (mAU)  | Area %        | Height %      |
|-----------------|----------------|---------------|---------------|---------------|
| 11.087          | 0.539          | 0.858         | 1.20          | 2.03          |
| 17.040          | 44.358         | 41.398        | 98.80         | 97.97         |
|                 | <b>44.897</b>  | <b>42.257</b> | <b>100.00</b> | <b>100.00</b> |

Supplementary Fig. 198. HPLC spectrum of chiral 9.

10,

1-(3,5-bis(trifluoromethyl)phenyl)-3-(1-(2-oxo-6,7,8,9-tetrahydro-2H

-quinolizin-4-yl)naphthalen-2-yl)thiourea

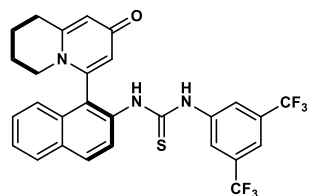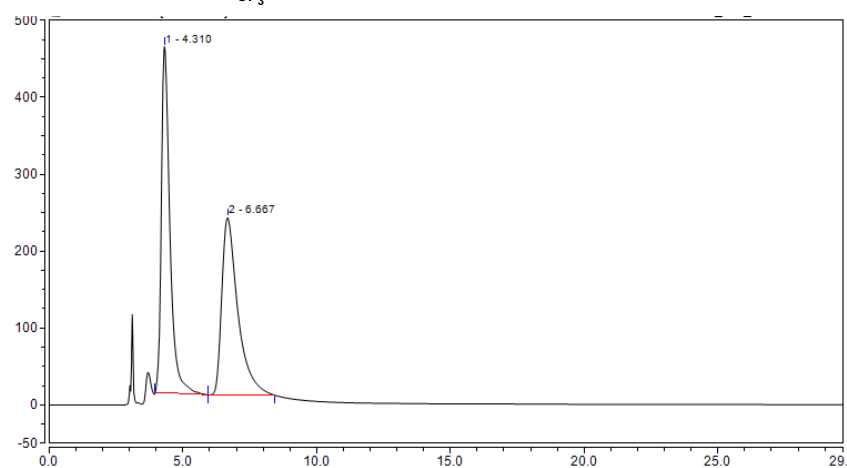

| Ret. Time (min) | Area (mAU*min) | Height (mAU)   | Area %        | Height %      |
|-----------------|----------------|----------------|---------------|---------------|
| 4.310           | 166.963        | 450.204        | 50.93         | 66.13         |
| 6.667           | 160.865        | 230.615        | 49.07         | 33.87         |
|                 | <b>327.828</b> | <b>680.819</b> | <b>100.00</b> | <b>100.00</b> |

Supplementary Fig. 199. HPLC spectrum of racemic 10.

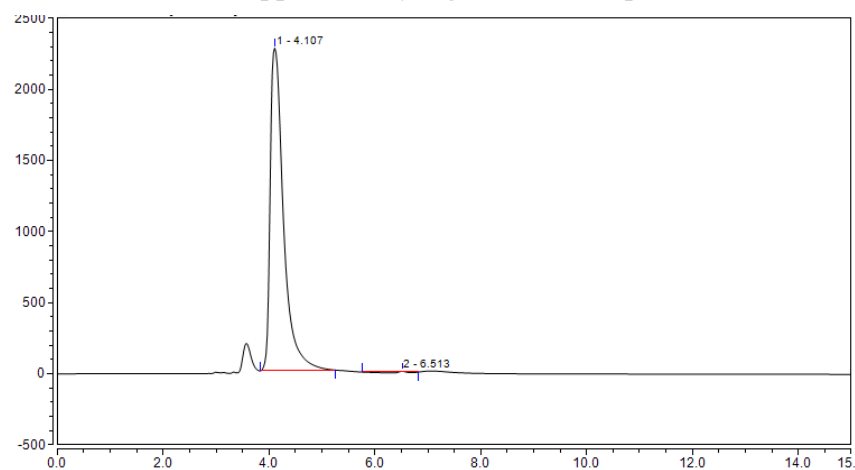

| Ret. Time (min) | Area (mAU*min) | Height (mAU)    | Area %        | Height %      |
|-----------------|----------------|-----------------|---------------|---------------|
| 4.107           | 663.051        | 2269.579        | 99.61         | 99.75         |
| 6.513           | 2.575          | 5.714           | 0.39          | 0.25          |
|                 | <b>665.626</b> | <b>2275.293</b> | <b>100.00</b> | <b>100.00</b> |

Supplementary Fig. 200. HPLC spectrum of chiral 10.

**11**, 1-(3,5-bis(trifluoromethyl)phenyl)-3-(1-(2-oxo-2H-quinolizin-4-yl)naphthalen-2-yl)thiourea

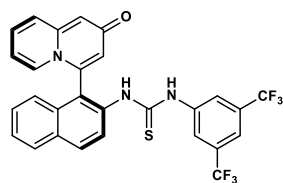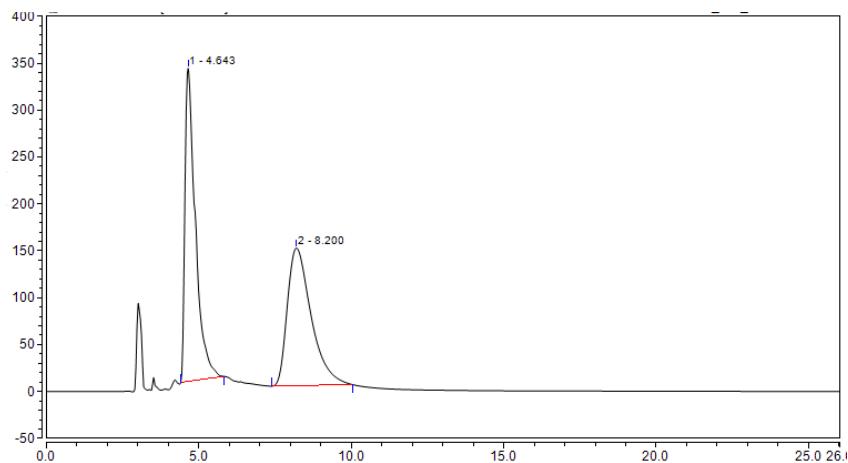

| Ret. Time (min) | Area (mAU*min) | Height (mAU)   | Area %        | Height %      |
|-----------------|----------------|----------------|---------------|---------------|
| 4.643           | 132.931        | 333.893        | 49.98         | 69.45         |
| 8.200           | 133.023        | 146.847        | 50.02         | 30.55         |
|                 | <b>265.953</b> | <b>480.739</b> | <b>100.00</b> | <b>100.00</b> |

**Supplementary Fig. 201. HPLC spectrum of racemic 11.**

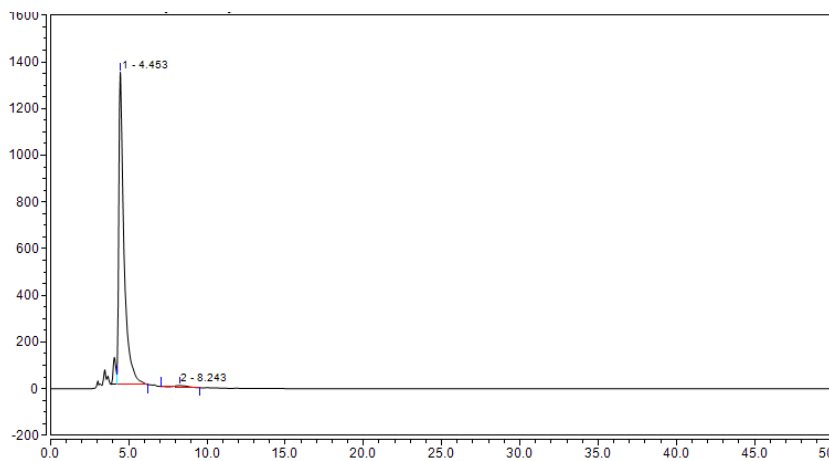

| Ret. Time (min) | Area (mAU*min) | Height (mAU)    | Area %        | Height %      |
|-----------------|----------------|-----------------|---------------|---------------|
| 4.453           | 515.280        | 1336.940        | 98.89         | 99.51         |
| 8.243           | 5.809          | 6.546           | 1.11          | 0.49          |
|                 | <b>521.089</b> | <b>1343.486</b> | <b>100.00</b> | <b>100.00</b> |

**Supplementary Fig. 202. HPLC spectrum of chiral 11.**



(S)-3-(p-tolylthio)cyclohexan-1-one

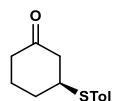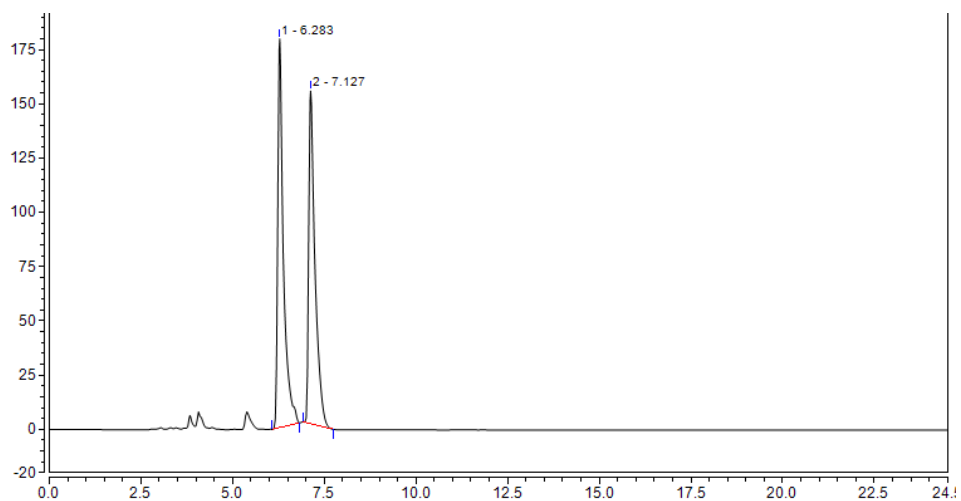

| Ret. Time (min) | Area (mAU*min) | Height (mAU)   | Area %        | Height %      |
|-----------------|----------------|----------------|---------------|---------------|
| 6.283           | 32.204         | 179.144        | 51.39         | 53.88         |
| 7.127           | 30.467         | 153.367        | 48.61         | 46.12         |
|                 | <b>62.671</b>  | <b>332.511</b> | <b>100.00</b> | <b>100.00</b> |

Supplementary Fig. 203. HPLC spectrum of racemic 3-(p-tolylthio)cyclohexan-1-one

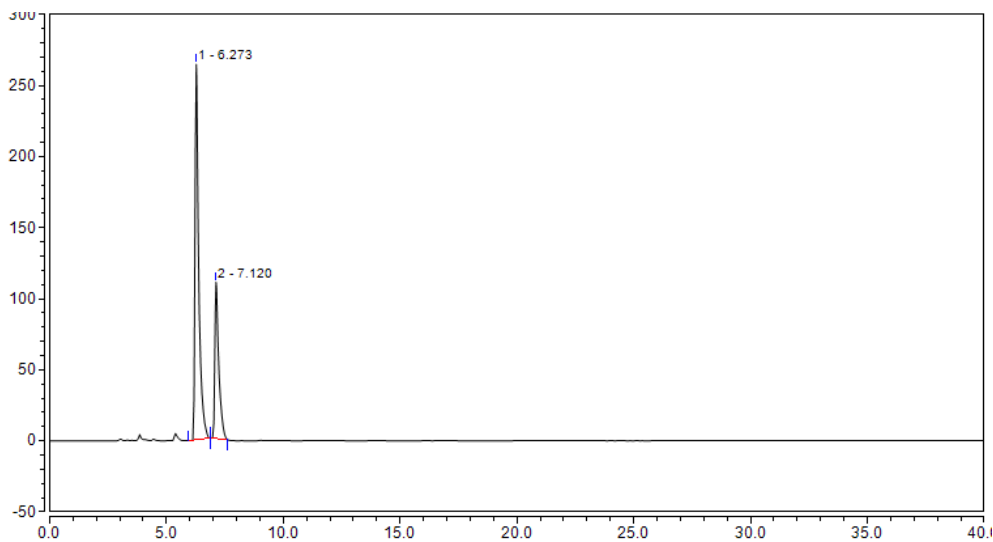

| Ret. Time (min) | Area (mAU*min) | Height (mAU)   | Area %        | Height %      |
|-----------------|----------------|----------------|---------------|---------------|
| 6.273           | 48.199         | 264.218        | 69.38         | 70.58         |
| 7.120           | 21.276         | 110.129        | 30.62         | 29.42         |
|                 | <b>69.475</b>  | <b>374.347</b> | <b>100.00</b> | <b>100.00</b> |

Supplementary Fig. 204. HPLC spectrum of chiral 3-(p-tolylthio)cyclohexan-1-one

## Supplementary References

1. Min, X.-L., Sun, C., & He, Y. Synthesis of 1-amino-2*H*-quinolizin-2-one scaffolds by tandem silver catalysis. *Org. Lett.* **21**, 724-728 (2019).
2. Ageshina, A. A., Chesnokov, G. A., Topchiy, M. A., Alabugin, I. V., Nechaev, M. S., & Asachenke, A. F. Making endo-cyclizations favorable again: A conceptually new synthetic approach to benzotriazoles *via* azide group directed lithiation/cyclization of 2-azidoaryl bromides. *Org. Biomol. Chem.* **17**, 4523-4534 (2019).
3. Li S.-L., Yang C., Wu Q., Zheng H.-L., Li X & Cheng J.-P. Atroposelective catalytic asymmetric allylic alkylation reaction for axially chiral anilides with achiral Morita–Baylis–Hillman carbonates. *J. Am. Chem. Soc.* **140**, 12836–12843(2018).
4. Li, Y., Manickam, G., Ghoshal, A., & Subramaniam, P. More efficient palladium catalyst for hydrogenolysis of benzyl groups. *Synth. Commun.* **36**, 925-928 (2006).
5. Rana, N. K. Selvakumar, S. & Singh, V. K. Highly enantioselective organocatalytic dulfa-Michael addition to  $\alpha$ ,  $\beta$ -unsaturated ketones. *J. Org. Chem.* **75**, 2089-2091 (2010).
6. Adams, R., & Yuan, H. C. The stereochemistry of diphenyls and analogous compounds. *Chem. Rev.* **12**, 261-338 (1933).
7. Winstein, S., & Holness, N. J. Neighboring carbon and hydrogen. XIX. *t*-Butylcyclohexyl derivatives. Quantitative conformational analysis. *J. Am. Chem. Soc.* **77**, 5562-5578 (1955).
8. Charton, M. Steric effects. II. Base-catalyzed ester hydrolysis. *J. Am. Chem. Soc.* **97**, 3691-3693 (1975).
9. Charton, M. Steric effects. 7. Additional V constants. *J. Org. Chem.* **41**, 2217-2220 (1976).
10. Bott, G., Field, L. D., & Sternhell, S. Steric effects. A study of a rationally designed system. *J. Am. Chem. Soc.* **102**, 5618-5626 (1980).
